# Supplementary material for: Variability in Leaf Color Induced by Chlorophyll Deficiency: Transcriptional Changes in Bamboo Leaves
Source: Preprints.org preprint supplement (doi:10.20944/preprints202311.0939.v2), 2023-12-27
Supplement: Supplementary file 2 [file supplementary]

Archive with 11 entries (11 files):
- Document S1.pdf
- Figure S1.jpg
- Figure S2.png
- Table S1.tsv
- Table S2.tsv
- Table S3.tsv
- Table S4.tsv
- Table S5.tsv
- Table S6.tsv
- Table S7.tsv
- Table S8.tsv
