# Supplementary material for: Variability in Leaf Color Induced by Chlorophyll Deficiency: Transcriptional Changes in Bamboo Leaves
Source: Preprints.org preprint supplement (doi:10.20944/preprints202311.0939.v2), 2023-12-27
Supplement: Supplementary file 2 [file supplementary › Table S1.tsv]

Sample	Raw Reads	Clean Reads	Clean Bases	Error(%)	Q20(%)	Q30(%)	GC Content(%)
Bm_G1	49957690	47530902	7.13G	0.02	96.82	92.17	54.24
Bm_G2	57647582	55202994	8.28G	0.01	97.75	94.37	53.87
Bm_G3	58272240	55460720	8.32G	0.02	96.81	92.13	53.91
Bm_A1	61993084	59391684	8.91G	0.01	97.47	93.7	53.88
Bm_A2	62831136	60043804	9.01G	0.02	96.34	91.04	55.04
Bm_A3	56468348	54271804	8.14G	0.02	96.97	92.38	54.5
Bm_GA1	61278648	58619420	8.79G	0.01	97.55	93.89	53.94
Bm_GA2	57829216	55928216	8.39G	0.02	97.07	92.52	52.36
Bm_GA3	63693312	61322908	9.2G	0.02	96.75	91.89	55.1
