# Supplementary material for: Variability in Leaf Color Induced by Chlorophyll Deficiency: Transcriptional Changes in Bamboo Leaves
Source: Preprints.org preprint supplement (doi:10.20944/preprints202311.0939.v2), 2023-12-27
Supplement: Supplementary file 2 [file supplementary › Table S2.tsv]

Unigene length interval							Information of transcriptome assemby
Unigene length interval	200-500bp	500-1kbp	1k-2kbp	>2kbp	Total		min length	mean length	median length	max length	N50	N90	total nucleotides
Number of Unigenes	100951	111452	77117	47359	336879		201	1090	740	14962	1586	502	367063318
	0.299665459	0.330836888	0.22891602	0.140581633
