# Supplementary material for: Variability in Leaf Color Induced by Chlorophyll Deficiency: Transcriptional Changes in Bamboo Leaves
Source: Preprints.org preprint supplement (doi:10.20944/preprints202311.0939.v2), 2023-12-27
Supplement: Supplementary file 2 [file supplementary › Table S3.tsv]

gene_id	Bm_G1	Bm_G2	Bm_G3	Bm_A1	Bm_A2	Bm_A3	Bm_GA1	Bm_GA2	Bm_GA3
Bm324511	0	0	0	0	2	9	5	2	0
Bm218421	11.92	22.3	41.51	7.15	15.17	5.53	1.08	5.04	14.78
Bm065720	18.82	9.52	9.41	0	0	0	0	37.86	0
Bm253245	0	0	2	1.33	3	5	2	2.68	0
Bm248056	0	0	0	1	0	3	1	0	0
Bm237047	2	4	1	0	0	0	1	0	0
Bm146294	0	0	0	6	0	0	6	0	0
Bm206830	1655.61	3181.55	1965.11	3230.77	2623.98	2374.28	2707.78	2789.15	2406.18
Bm216211	0	0	0	2	4	5	1	0	0
Bm073236	0	0	0	1	3	0	0	2	3
Bm193955	0	0	0	34	88	69.21	208.53	135.66	120.96
Bm271849	4	9	1	2	0	2	1	0	0
Bm239973	13.93	8.11	3.63	1.64	1.7	1.66	1.72	3.42	2.69
Bm130443	3	5	0	0	1	0	0	0	2
Bm230429	0	0	0	6	12.63	12.56	11	12.99	4
Bm087887	1	3	4	1	1	1	4	0	2
Bm331700	3.34	5.48	4.74	2.9	5.54	7.71	9.24	9.15	4.81
Bm088778	39.26	83	47.55	16.54	23	19	22	0	20
Bm145454	0	4	0	2	1	0	0	1	1
Bm264402	0	0	0	0	0	0	2	9	5
Bm012584	34.42	1.86	17.89	1	1.07	0	0	27.91	32.09
Bm082669	5.71	4.54	8.73	7.53	0	3.86	0.22	0	1.72
Bm233107	36.1	22.56	31.26	16.79	8.52	11.55	9.53	13.31	8
Bm193638	14.65	19.42	0	0	0	10.28	0	6.45	4.94
Bm028387	85	77.39	103	116.52	155.92	108.38	203	177	171
Bm075765	0	2	0	0	0	0	0	0	0
Bm054047	0	2	0	7	5	1	5	1	0
Bm318316	14.19	28.84	11.63	65	31.13	29	36	28.24	54
Bm139097	10	28	11	5	9	8	18	8	12
Bm202054	4.98	0	8.99	0	0	0	0	7.85	0
Bm095942	3.88	0	2.05	2	3	0	0	0	1
Bm177971	5.16	13.95	7.15	18.98	14.41	13.11	10.41	18.34	15.12
Bm322511	0	0	0	0	1	0	0	0	0
Bm159911	0	0	6.88	12.3	18.42	12.18	9.12	6.19	17.9
Bm212841	222.15	253.2	268.65	419.92	391.84	346.5	409.97	454.31	359.95
Bm034759	4	4	8	0	0	0	0	7	7
Bm111700	0	0	0	0	7	4	0	2	0
Bm190611	5	0	5	17.16	16.4	12.44	12.98	12.51	26.83
Bm127436	12.77	23.32	19.01	6.28	5.62	13.09	6.01	7.42	5.64
Bm213915	25.26	19.92	30.19	0	1	0	1.92	2.57	0
Bm169414	315.08	322.12	361.37	894.25	907.6	895.17	725.74	877.77	835.59
Bm251897	0	22	0	0	0	0	0	0	0
Bm134005	0	0	0	18	10	19	26	8	5
Bm225927	32	115.18	38.83	33	20	29	32.95	31.5	22
Bm096740	0	0	0	1	2	2	1	1	0
Bm324516	312.92	181.94	339	1429.28	1779.05	1681.33	1142.41	1146.21	1218.29
Bm035381	7.95	19.54	14.96	6.98	6.28	10.28	20.76	11.73	14.96
Bm042350	29.21	27.74	36.51	54.09	51.9	60.56	53.88	56.66	37.56
Bm007136	9	0	13	0	0	0	0	0	2
Bm279452	0	0	0	9	31	24	12	2	1
Bm319491	7	2	8	0	0	0	0	11	17
Bm295350	0	2	0	0	0	0	0	1	2
Bm233347	3.14	5.48	1.46	0	0	1.27	2.61	0	1.44
Bm210596	0.32	0.07	0.18	0.92	47	0.03	0.26	45	0.18
Bm075503	1	17	0	1	1	0	0	0	0
Bm105657	0	4	1	0	0	0	0	2	1
Bm126185	77.5	22.03	95.67	59.81	92.41	68.16	74.35	88.25	47.9
Bm162553	2.39	0	0.32	0	0.99	0	5.43	0	0.07
Bm169810	45	0	39	8	21.15	0	17	17	19.11
Bm243201	52.78	51.76	12.58	8.1	19.13	25.6	29.46	38.1	13.38
Bm241789	3.9	0	5.1	3.55	0	0	0	8.94	0
Bm113384	0	10	0	0	2.39	0	2.46	4.82	2.48
Bm086582	0	0	0	0	2	3	3	0	0
Bm005958	14.67	87.39	12.72	36.86	9	20.49	39.31	17.31	29.82
Bm093605	5	2	6	2	3	0	0	0	0
Bm159493	0	0	0	1	1	3	0	1	2
Bm126765	2	0	1	1	1	1	0	0	2
Bm031036	1	0	0	3	6	2	4	19	11
Bm123324	2.63	0	1.72	0	0	0	0	1.29	4
Bm070750	3	1	1	0	0	0	0	4	4
Bm210923	230.84	257.57	247.19	399.66	414.44	451.27	363.52	384.43	373.19
Bm069827	29	0	31	0	12	11	0	8	9
Bm191131	0	0	0	1	1	0	0	0	2
Bm150181	107	14	143	3	4	0	0	16	28
Bm161295	185.65	274.8	235.93	1.72	1.13	5.08	5.28	5.22	3.6
Bm159858	450.98	690.6	453.54	364.41	341.92	189.76	366.23	313.77	383.11
Bm066729	2	1.48	2	0	3	0	0	0	0
Bm286497	0	0	0	2	0	0	3	0	0
Bm009010	0	0	0	0	35	42	0	40	31
Bm201957	8.29	8.12	43.68	0	0	1	0	0	7.11
Bm004278	0	0	2	0	2	0	3	4	3
Bm224413	2.12	1.04	3.14	2.16	0	0	1.05	5.21	1.02
Bm039898	5	0	11	0	0	2	0	0	1
Bm176876	0	1	0	0	1	0	0	0	1
Bm172372	0	2	0	0	0	2	3	2	1
Bm062921	3773.64	3843.7	4632.64	3022.26	2973.63	2509.99	2925.06	2938.85	2504.06
Bm281384	3	5	13	4	2	2	3	1	1
Bm141846	17.97	44.41	16.73	70.25	67.43	58.55	51.58	46.61	106.59
Bm083249	0	0	0	4	15	7	16	6	9
Bm294331	0	0	1	1	2	0	1	1	0
Bm297839	12.52	6.26	19.84	0	0	2	3	7.56	1
Bm270346	0	24	6	2	3	2	8	5	1
Bm140600	9.38	5.06	14.43	0	0	0	4.82	2.98	3.26
Bm086081	7.59	2.24	20.9	0	0	0	0	9.89	19.93
Bm183032	0	3	1	3	0	2	1	2	7
Bm068671	0	0	2	0	1	5	2	2	2
Bm111843	352.98	298.47	411.13	1419.5	1314	1511.59	1128.83	1228.52	1025.31
Bm283694	0	3	0	1	0	0	0	0	0
Bm331988	3.27	5.64	1.74	2.98	0	0	0	7.61	2.09
Bm186627	8	0	0	5	1	1	0	0	0
Bm289675	0	0	0	0	0	0	1	0	0
Bm056956	13	1	8	1	7	0	0	0	0
Bm078775	0	0	0	3.49	0	3.97	0	0	0
Bm072476	0	0	0	0	2	0	2	2	0
Bm231649	4	2	2	3	5	4	0	7	2
Bm090371	0	0	0	4	4	2	5	0	1
Bm148457	800.34	735.11	988.65	332.22	338.15	207.74	357.52	454	533.85
Bm211104	1	0	0	0	0	0	0	2	0
Bm267438	0	0	0	16	4	1	5	6	5
Bm114626	9	5	8	0	0	0	0	10	10
Bm289160	10.69	10.91	2.11	2.2	6.41	2.17	0	4.25	0
Bm012202	9.84	7.64	4.34	63.19	29.57	48.24	71.1	60.97	41.23
Bm312227	1	0	0	6	0	0	0	5.34	0
Bm083157	27	24.33	51	87.01	118.78	139	58	124	103.66
Bm052624	5	18	3	10	11	16	16	11	7
Bm216274	0	0	0	28.55	21.72	35.13	41.07	0	30.77
Bm062312	0	0	0	23	0	33	32	0	14
Bm306983	21.18	0	11.17	12.34	7.34	10.18	6.86	0	0
Bm270954	0	0	0	1	0	0	0	0	0
Bm076328	42.3	60.76	24.5	0	0	0	0	3.22	0
Bm028275	6	2	4	1	6	7	4	4	4
Bm183716	9	35.51	8.61	80.83	106.84	85.13	74.88	92.3	137.72
Bm190202	0	0	1	164	258	201	161	803	712
Bm090590	5	6	6	0	0	0	0	0	0
Bm172733	2.26	2	3.31	1.1	0	3.23	1.03	0	0
Bm191207	2	2	1	0	0	0	0	0	1
Bm033551	0	0	1	0	2	0	0	3	0
Bm202526	172.19	235.11	200.05	6.9	11	9	15.33	16.24	13
Bm039411	0	0	0	0	9	0	1	0	0
Bm033156	1.88	7.03	4	11.83	8.17	10	10	0	10.97
Bm017830	0	0	0	3	4	2	4	2	1
Bm261694	7	7	6	0	1	0	0	0	0
Bm167477	0	11	0	0	0	0	0	0	0
Bm301487	0	0	2	2	0	2	2	4	9
Bm091029	5.85	25.01	8.11	237.53	166.82	210.15	138.69	196.01	186.98
Bm115057	66	9	69	0	3	1	0	55	95
Bm117541	1	0	1	0	0	0	0	1	0
Bm064370	2	1	2	0	0	0	0	2	1
Bm096589	2	0	9	0	1	0	0	1	3
Bm329891	1	6	1	0	0	0	0	1	2
Bm102287	14	0	13	0	6	3	0	8	2
Bm252329	4.3	0	12	0	0	0	0	3	0
Bm262976	0	0	0	1	2	0	3	2	0
Bm249993	0	0	5.95	4.06	0	13.62	6.3	11.39	7.23
Bm291913	159	296	194	20	44	24	30	26	30
Bm179629	0	0	0	0	0	1	2	1	1
Bm274654	1	7	0	5	1	2	4	4	3
Bm227897	83	38	129	3	3	1	0	116	158
Bm035690	0.11	11.08	10.36	0	15.19	5.52	13.11	0	5.68
Bm073877	0	0	0	6	1	4	4	1	1
Bm282717	0	0	1	0	6	7	0	6	2
Bm022893	1	1	4	2	2	4	3	3	2
Bm092226	4	9	3	1	0	0	0	1	0
Bm196051	2	9	1	2	0	0	1	1	0
Bm296852	0	0	0	0	2	0	3	2	0
Bm309623	0	0	0	0	0	2	0	5	12
Bm086129	2.46	0	0	3.77	5.15	1.27	4.26	7.76	0
Bm045336	0	0	0	5	5	2	4	2	1
Bm189305	4.72	0	3.22	4.45	0	2.54	0	0	3.02
Bm172667	0	0	0	1	0	0	0	0	0
Bm192036	52.17	21.9	87.46	0	47.18	19.52	94.87	58.72	40.71
Bm011340	0	4	3	0	0	1	3	3	0
Bm306957	0	0	0	4	8	4	4	4	4
Bm183428	0	12.7	8.32	0	6.88	1.82	6.77	3.25	8.65
Bm305358	6.95	5.73	0	8.3	3.17	9.09	21.26	9.86	12.6
Bm063919	227.15	386.37	298.5	128.51	197.67	109.46	172.85	116.74	184.42
Bm333220	708.45	428.88	994.69	132.31	171.38	130.55	236.28	223.78	233.02
Bm310531	51.43	62.75	101.62	27.73	21	10.76	57.29	83.16	50.2
Bm278614	4	5	3	0	1	0	0	0	2
Bm166481	4	2	7	3	5	1	4	7	4
Bm204062	42	31	33	36	28	32	39	30	41
Bm088056	12	22	16	6	2	9.01	5	6	12
Bm285952	0	0	0	2	5	7	0	0	0
Bm175845	0	0	0	1	2	1	0	0	1
Bm279697	9.66	30.09	19.53	63.79	62.68	53.81	40.12	69.75	40.24
Bm202795	31.1	0	22.98	11.02	18.07	21.95	22.71	6.48	33.47
Bm331845	0	0	3.2	4.36	0	0	0	4.44	0
Bm295985	0	0	0	2	2	0	3	1	1
Bm078950	0	0	0	0	3	14	4	0	0
Bm274065	0	1	0	0	0	0	0	0	0
Bm062667	1104	380	1204	150	174	141	353	345	368
Bm331378	0	0	0	0	6	11	0	3	1
Bm262289	2	3	4	0	0	1	0	2	0
Bm017794	34.46	36.52	20.48	6.69	3.54	0	3.57	0	13
Bm045712	0	0	0	3.8	0	0	0	7.86	0
Bm245956	41.36	72.85	50.69	0	0	0	0	0	0
Bm018113	25	0	11.63	0	0	0	0	18.76	22.19
Bm228945	15.51	41.83	27.39	16.69	5.97	0	13.1	0	0
Bm021980	42	34	49	3	18	9	0	0	8
Bm137772	0	0	3	1	0	0	1	0	1
Bm278876	6	5.78	2.17	10.69	2.4	7.51	10.6	11.4	1.11
Bm140162	0	1	1	0	0	0	2	1	3
Bm203427	8.33	0	12.44	0	0	0	0	3.46	0
Bm110715	70.12	68.96	65.63	25.48	26.24	31.29	66.37	29.63	15.88
Bm135913	17.52	3.58	17	0	3.56	0	0	0	5.45
Bm298007	1	2	1	0	1	0	0	2	0
Bm020215	0	3.51	74.59	1	9	7	1	128.82	114.93
Bm104648	2	3	2	0	0	0	5	2	0
Bm331285	0	4	0.03	0	1	0	0	4.03	0
Bm031732	58.79	0	22.4	0	0	0	0	46.07	48.26
Bm004801	40.31	50.81	56.35	41.61	50.37	40.03	44.72	40.79	41.52
Bm083378	0	0	0	0	0	0	0	2	0
Bm259728	543.74	670.32	748.04	642.14	718.66	711.67	762.9	665.88	589.06
Bm202822	0	10	0	0	0	0	0	0	0
Bm022346	36.3	30.36	35.58	4	0	2	3	4.16	10
Bm174332	0	0	0	4	2	2	1	3	1
Bm055720	12.31	7.87	11.06	2.49	5.93	1.41	0	3.12	4.66
Bm072367	4.75	2	6.91	12	5	3	4.68	13	3
Bm123453	0	0	0	1	0	0	1	3	2
Bm223327	59	51	55	14	14	11	10	11	14
Bm012582	2.97	0	3.23	0	4.4	0	1	13.15	10.21
Bm328886	0	0	0	5	0	1	2	2	6
Bm040419	8	3.92	9.57	22.11	22.47	24.39	14.29	19.64	20.72
Bm218014	1	0	3	0	2	1	0	3	0
Bm335718	0	0	0	1	10	1	1	0	0
Bm330720	0	0	0	3	0	0	4	0	0
Bm253469	0	0	13.29	0	0	4	0	0	0
Bm227921	23.95	41.03	16.29	13.45	0	10.67	3.76	10.77	0
Bm298948	15.81	34.02	18.34	2.84	9.03	2.73	2.8	15.49	12.58
Bm082118	0	0	0	0	0	0	0	0	2
Bm244043	0	0	0	9	6	10	8	2	2
Bm088690	0	14.16	25.46	49.75	3.11	27.31	0	23.19	0
Bm083757	0	0	0	0	12	2	3	2	0
Bm317497	6.3	21.51	7	1	0	0	3	0	2
Bm015018	0	0	0	0	0	0	0	3.17	0
Bm295612	0	0	0	2.48	5	2.67	6.82	0	2
Bm191267	105	29	110	1	0	0	2	100	145
Bm040035	2	6	3	0	0	1	0	0	0
Bm064782	0	0	0	0	2	4	2	2	2
Bm195648	7	1	3.18	12.47	16.32	15.57	5.95	6.82	9.45
Bm219403	0	0	0	0	6	11	11	5	1
Bm121609	61	64	66	35	58	52	60	49	42
Bm020845	31.26	0	0	0	9.06	0	0	0	0
Bm199530	77	18	88	3	1	0	0	113	89
Bm083947	22	18.74	26.22	30.34	12.54	24.68	13.43	45.21	20.86
Bm187126	0	2	1	7	4	6	3	7	4
Bm291404	31.55	10	40	0	0	0	0	26.81	49
Bm121565	0	0	1	3	17	4	0	10	4
Bm117714	0	0	33	0.5	1	0	0.5	29	0
Bm097372	2	1	1	2	1	0	0	1	0
Bm292853	0	0	0	1	0	3	0	1	1
Bm287209	53.48	33.09	51.32	68.82	46.61	91.18	57.37	65.78	15.73
Bm085980	22.08	12.71	6.91	31.92	20.5	24.46	8.58	27.76	45.28
Bm154433	2	0	1	0	0	0	0	4	2
Bm036301	5	0	3	0	0	0	0	0	0
Bm126425	355.85	552.26	461.6	583.5	520.99	568.09	633.78	777.13	854.96
Bm316240	4.84	23.12	24.7	0	7.99	0	4.37	4.74	0
Bm145806	3	0	2	0	3	11	3	1	3
Bm027168	1	0	2.23	0	1	0	0	1	0
Bm080899	153.85	78.09	224.62	262.86	314.86	312.59	305.93	225.99	269.71
Bm279495	0	20.87	3.2	120.95	182.5	186.45	136.36	152.05	89.88
Bm224462	0	0	0	29.54	26.35	15.27	17.47	29.64	29.13
Bm300803	404.3	523.76	477.03	207.36	149	123.84	328.74	259.94	314.12
Bm101890	6	0	4	0	1	0	0	0	0
Bm008104	45.98	38.45	49.8	30.09	35.5	29.29	0	36.95	31.25
Bm081889	0	0	1.1	3.56	11.1	2.29	7.96	1.48	1.18
Bm186679	67.19	43.53	81.21	44	56	20.32	73	51.7	65.85
Bm229106	6.05	0	6	0	1	0	0	3	0
Bm175356	0.02	146	90.22	152.35	71.26	126.75	175.39	102.86	129.77
Bm296535	1	1	0	0	0	0	0	0	0
Bm009668	0	0	0	0	0	4.13	2.15	0	0
Bm022180	0	0	0	4	6	3	1	0	0
Bm130087	1	4	0	1	1	0	1	0	0
Bm335524	54.96	79.73	43.73	61.37	83.12	87.53	74.12	76.45	60.88
Bm218077	3	0	1.02	2.02	4.02	3.03	1.01	7.07	5.03
Bm328669	0	0	0	8	0	0	4	0	0
Bm320642	0	32	0	101	0	0	143	0	0
Bm128996	12.17	10.87	24.28	37.36	16.6	23.17	10.74	17.61	25.07
Bm240349	6	2	4	0	0	0	0	0	0
Bm198054	0	0	0	0	0	1	0	0	0
Bm244073	18.31	51.89	36.93	39.75	92.8	103.31	78.89	64.95	69.34
Bm084700	0	5	0	0	0	0	5	0	0
Bm130012	0	0	4.09	107.69	191.34	126.3	54.28	79.35	120.29
Bm260583	1	0	4	0	0	0	4	1	0
Bm229791	5	0	6	0	0	0	0	0	0
Bm229042	15.57	32.59	33.49	0	19.14	0	0	0	34.46
Bm213806	20.21	12	33	0	0	1	0	3	2
Bm200327	0	0	0	0	0	1	1	0	0
Bm020521	0	0	3.66	0	0	0	0	1	0
Bm004185	0	0	0	0	0	0	1	0	0
Bm174957	2.68	29.57	14.82	9.33	8.18	3.58	4.46	14.68	2.98
Bm132221	14.26	44.82	12.34	8.04	4.03	6.74	9.21	11.44	4.52
Bm324560	11	1	1	0	0	0	0	0	0
Bm119374	0	0	1	0	0	0	0	0	0
Bm077095	159.93	225.23	195.28	65	95.99	49.2	105	119.95	77
Bm017500	0	0	0	6	0	0	6	0	0
Bm063866	0	0	0	0	1	3	1	0	1
Bm292644	0	0	0	2	13	4	0	0	0
Bm129577	34	15	42	1	0	1	0	49	52
Bm114583	9	2.45	16.6	0.61	13.53	9.78	9.02	1.89	6.4
Bm039470	1	1	7	12	28	29	8	1	4
Bm308654	0	0	0	0	2	0	0	0	0
Bm230093	0	0	1	12.11	12.94	1.2	6.91	9.66	11.47
Bm256700	28.94	18	23.5	3.19	0	1.78	14.68	12.72	0
Bm247431	0	0	1	0	0	0	0	5	1
Bm129306	96.04	0	87.73	42.68	50.38	51.58	89.48	45.61	43.62
Bm283877	3.85	2.96	2.43	0	0	0	0	0	0
Bm298566	0	0	0	1	6	0	1	0	0
Bm264369	0	2.14	0	0	0	0	0	3.21	0
Bm312072	0	56	0	0	0	0	0	3	1
Bm040281	0	0	0	8	25	14	9	12	11
Bm212081	1	5	0	3	3	0	2	1	1
Bm161860	0	2	0	0	0	0	0	0	0
Bm264407	47.91	82.74	86.49	103.63	49.25	54.87	117	72.83	88.8
Bm109098	3	16	9	6	10	5	2	3	1
Bm060894	411.43	537.02	441.02	424.7	431.5	365.49	340.87	427.98	414.55
Bm044150	42	15	52	1	1	0	0	69	68
Bm017803	21.83	25.27	20.51	4.11	3.99	2.25	2.48	0	4
Bm250361	77.95	117.08	98.65	137.62	113.19	113.45	118.46	115.73	117.79
Bm018490	2	2	0	0	0	0	0	1	2
Bm026049	1.89	5.54	1.69	1.81	3.82	5.75	2.12	3.62	9.65
Bm246082	3.06	11.51	8.38	13.44	3.04	8.23	2.91	30.78	14.85
Bm220873	0	0	0	38	0	0	0	0	0
Bm241866	6	0	7	0	0	0	0	0	0
Bm275891	35	49	48	14	8	9	19	17	16
Bm036877	2	4	1	1	0	0	2	0	0
Bm276952	9	7	14	28	18	19	4	3	8
Bm155240	0	0	0	1	0	1	0	0	4
Bm263695	0	1	0	0	0	1	2	0	0
Bm172806	12	19.62	0	7.3	7.94	4.28	11.87	16.93	11.36
Bm063316	1.82	18.73	8.72	0	0	0	1	1	0
Bm257072	0	0	1	3	6	4	0	0	0
Bm118917	0	37.08	0	7.76	0	0.1	2.15	0	7.51
Bm266158	0	0	0	2	0	0	2	0	0
Bm266174	0	0	0	0	1	0	0	0	0
Bm215827	6	23.33	12	19.07	20.82	23.35	20.71	15.46	15.68
Bm193515	21.57	0	8.05	0	0	0	0	45.45	49.54
Bm157978	68.01	49.84	75.39	85.44	139.93	96.46	211.1	156.24	179.81
Bm088392	3	4	2	0	0	0	0	0	0
Bm247881	0	0	0	10	0	0	14	0	0
Bm001757	0	0	0	6	3	6	5	6	7
Bm136848	1	4	0	1	0	1	0	0	0
Bm011573	10	0	8	0	0	2	1	2	0
Bm051865	0	0	0	9.46	15.2	0	0	0	0
Bm210739	16	12	8	4	3	2	3	3	2
Bm028045	0	0	0	2	0	0	1	0	0
Bm037607	10	19	5	1	0	2	0	2	2
Bm119948	1	3	0	1	0	0	0	3	0
Bm075659	0	0.65	0	0	0.05	2	0	0	15.58
Bm197874	6	15	7	1	7	13	10	1	5
Bm145640	2	2	1	0	0	1	0	0	0
Bm304757	24	7	19	0	0	0	0	27	32
Bm125945	1	0	1	1	0	0	1	0	0
Bm116822	0	0	0	21.79	17.49	18.35	8.2	3.66	0
Bm074710	0	3	0	22	0	0	18	0	0
Bm036787	0	0	0	3.44	1.36	0	3.17	2.82	0.14
Bm148632	0	0	0	0	0	0	1	1	0
Bm129500	2.04	0	4	2.35	13.7	9.59	14.84	10.15	7.56
Bm060030	6	20.97	9.44	0	1	0	2.76	1	1.02
Bm089340	9.83	0	0	0	0	0	0	0	34.59
Bm057031	5	2	3	0	0	0	0	2	18
Bm071755	32	26	52	42	41	27	30	42	37
Bm198449	4	4	5	0	3	0	0	0	0
Bm026739	0	6	0	0	0	0	0	0	0
Bm219988	0	14.44	0	0	0	0	0	0	0
Bm168037	0	0	0	1	0	0	1	0	1
Bm161998	1	0	2	2	0	0	1	0	0
Bm079669	2	0	1	0	1	1	0	2	0
Bm253017	21.66	27.35	16.7	7.77	15.73	9.36	14.16	16.39	13.87
Bm108976	0	1	0	3	0	0	4	0	0
Bm110639	40.67	0	0	0	6	0	0	0	16
Bm105175	123.48	234.67	139.28	95.64	135.86	104.32	128.86	121.37	150.2
Bm000152	4	2	4	4	11	6	4	6	1
Bm128036	0	0	1	0	0	0	0	0	0
Bm262916	813.06	961.82	899.48	949.03	1095.28	951.68	1054.84	967.79	1075.29
Bm046981	0	0	0	28.46	2.67	3.92	5.64	37.64	34.16
Bm000308	3.36	6.26	4.28	0	1.48	7.56	0	3.07	4.04
Bm138377	0	0	0	0	1	3	0	3	4
Bm285907	0	9	0	0	0	0	0	0	0
Bm193912	7930	3014	2951.95	274	161	302	545	2294	3116
Bm171875	4	0	1	34	79	53	19	35	33
Bm080683	27	43	45	18	20	10	17	26	17
Bm205781	0	4	0	7	0	0	3	0	0
Bm206927	1	0	0	0	4	3	1	0	0
Bm198932	0	24.57	2.06	0	0	0	4.54	0	8.14
Bm008128	167.56	94.62	168.61	201.17	182.81	201.08	192.9	229.34	176.63
Bm227528	10.5	47.06	61.35	0	0	0	0	0	0
Bm117627	1.71	0	0	3.9	1.86	0	0	14.03	9.3
Bm262435	0	0	0	4	0	0	10	0	0
Bm224835	3	0	4	0	0	0	0	1	3
Bm293959	0	0	0	23	20	6	2	14	8
Bm166180	6	3	6	0	0	0	0	10	3
Bm151613	63.89	35.24	56.75	78.86	76.96	44.61	59.08	73.22	47.36
Bm283435	0	0	0	9	31	8	10	8	5
Bm074096	0	0	0	0	0	1	0	0	0
Bm283632	0	2.36	3.22	4.79	12.93	22.21	2.65	4.9	2.14
Bm090999	1	3	0	1	0	0	0	1	0
Bm212223	0	0	0	7	14	7	11	3	8
Bm256481	87.31	69	104.08	0.5	33.56	62.74	5	4.57	6.4
Bm057462	1	1	0	1	0	1	2	1	3
Bm166504	11	0	5.37	0	0	1.73	0	0	1.11
Bm173291	20	6	16	0	0	1	1	2	0
Bm081778	1	0	2	1	1	0	2	1	0
Bm040912	0	2	0	0	0	1	0	0	0
Bm068500	0	0	0	0	0	0.35	0	0	0
Bm193695	1	1	0	0	0	0	0	0	0
Bm008602	0	0	1	6	5	4	34	10	4
Bm193957	1	0	2	0	0	0	0	0	0
Bm293466	44.67	85.79	66.71	67.62	65.06	63.52	73.04	79.1	82.3
Bm249398	92.49	97.46	110.63	160.22	130.06	120.7	137.72	126.04	115.57
Bm169138	3	0	0	0	0	0	0	1	1
Bm210605	0	0	0	0	0	1	10	0	1
Bm023374	0	0	0	1	0	0	0	0	0
Bm246753	0	7.36	4.43	5.69	3.95	0	4.33	0	4.3
Bm225599	0	0	0	1	2	0	0	2	1
Bm179190	0	0	0	128.39	30.79	31.09	9.27	0	2.02
Bm253089	65.15	138.65	68.1	82.22	38.37	36.8	59.39	47.76	36.32
Bm141859	4.2	0	4.09	0	0.31	0	7	5	0
Bm174636	99.41	57.93	43.61	18.39	56.52	81.01	74.13	32.24	30.49
Bm071690	0	0	0	0	5	1	6	6	4
Bm096712	0	4	0	24	0	0	31	0	0
Bm063022	31.27	39.38	16.82	1.34	5.61	14.23	1.36	6.15	2.67
Bm159636	0	0	0	6	12	15	20	16	16
Bm263404	0	24	0	47	0	0	91	0	0
Bm296803	0	0	0	13.23	6.67	9.95	37	14	19
Bm291920	16.74	12.84	31.86	43.43	85.55	60.16	30.85	86.68	53.96
Bm105466	5.86	0	6.23	2.39	0	0	9.92	2.48	0
Bm019157	0	0	1	8	8	11	16	5	18
Bm002703	0	2	0	2	0	0	12	0	0
Bm311372	0	0	0	1	1	3	2	2	3
Bm178338	23	12	22	0	2	0	0	0	0
Bm171796	0	0	0	1	0	1	1	4	3
Bm203854	0	5	0	2	0	0	1	0	0
Bm244669	0	0	0	0	0	1	0	0	0
Bm081932	0	7	0	0	0	0	0	0	0
Bm124908	0	0	0	1.49	1	5	7	0	0
Bm057343	10.68	50.73	7.75	2.39	3.48	2.23	1.19	1.08	0
Bm112232	3.11	3.09	9	2.17	0	3	0	1	2
Bm093033	52.58	213.99	88.55	40.43	23.79	18.8	52.42	28.47	34.73
Bm319383	0	0	0	4	5	1	4	2	1
Bm151565	12	57	7	1	0	0	3	2	0
Bm303294	66	24	79.02	166.34	138	115	182.51	156	155
Bm024173	4.58	10.41	0	6.13	8.25	5.39	11.28	3.47	2.66
Bm297556	3.11	0	4.76	2	0	2	3.26	0	4
Bm292874	1	0	0	28.77	0	10.09	19.23	13.26	0
Bm253643	1	1	0	0	3	2	0	2	1
Bm033082	1	5	5	9.93	7.82	6.59	1.46	7.44	1.12
Bm082209	1.35	9.08	3.28	8.61	1.14	3.36	1.94	3.65	2.93
Bm191759	69.25	160.32	58.51	77.98	107.71	80.98	155.27	77.91	116.45
Bm088760	110.68	55.15	161.77	0	2	4	0	129.1	169
Bm015869	0	2	0	19.45	53.87	5.64	0	39.65	33.7
Bm078026	137.24	338.9	159.44	41.64	80.26	96.36	19.39	64.64	27.29
Bm219285	5	0	2	0	0	0	0	0	0
Bm038239	87.96	209.3	130.03	62.37	140.33	35.64	41.95	104.8	24.13
Bm255279	1	2	0	0	0	0	0	1	1
Bm154573	0	0	0	2	0	0	0	0	2
Bm304257	0	0	0	0	0	2	2	2	1
Bm188358	26.39	41.64	30.69	17	13.76	17	32.65	33.28	25.72
Bm177991	22	12	24	0	16	0	0	0	0
Bm025929	4	0	3	0	9	21	0	11	20
Bm208235	0	0	0	0	0	0	2	0	0
Bm001557	0	15.14	0	20	0	0	12	0	0
Bm298092	11	5	16	0	0	0	0	10	10
Bm258943	0	0	0	0	4	0	2	0	0
Bm249129	0	0	0	14.85	10	7	8.62	17.08	4
Bm080764	18.79	76.48	16.57	14.64	12.96	7.89	34.94	17.99	7.97
Bm063169	6	6	5	0	0	0	3	0	3
Bm118462	94	83.9	114.75	231.78	327.4	170.69	274.45	152.71	250.64
Bm111698	7.37	0	0	0	0	0	0	0	29.39
Bm277547	12	3	7	1	0	0	0	0	0
Bm139741	0	0	0	0	4	1	0	3	4
Bm229794	0	0	0	0	0	0	1	0	1
Bm307138	0	0	0	0	3	1	2	0	2
Bm318980	424.22	725.68	548.77	337.31	296.78	302.48	469.03	425.28	435.41
Bm103420	0	0	0	1.68	1.55	4.99	3.88	1.37	0
Bm099335	26	28	28	22	15	23	16.08	37	15
Bm205944	60.48	85.97	79.04	78.98	91.27	101.46	78.99	109.85	136.61
Bm208396	0	0	0	2	3	6	5	0	0
Bm199695	7.6	2.84	2.91	8.35	3.94	5.64	3.75	3.27	0.81
Bm319381	14	54	32.52	0	0	0	0	0	0
Bm033835	4	0	2.24	0	0	0	0	1	2
Bm148472	13.25	13.21	62.31	2	0	1	3	97.52	56.46
Bm333245	3	0	6	0	0	0	1	3	4
Bm333969	0	0	0	2	4	1	17	42	52
Bm052987	1	2	1	0	0	0	1	1	0
Bm117071	3	0	1	1	15	10	1	5	12
Bm015208	0	0	0	1	3	2	2	4	0
Bm279142	1.48	10.88	8.07	1	0	1	0	1.29	0
Bm327912	0	0	0	18.29	6	0	2	2	5
Bm089147	0	0	0	0	0	0	5	1	0
Bm015183	121	0	117	0	48	46	0	56	55
Bm082471	30.66	8.91	13.07	31.34	25.64	18.71	37.92	41.16	31.44
Bm326344	0	10	0	8	0	0	5	0	0
Bm188651	103.21	107	96	57.7	67	53	62	60.63	74
Bm162486	0	0	0	4	0	0	5	0	0
Bm149479	19.57	4.2	0	0	0	17.68	0	0	6.57
Bm336224	0	0	0	3	3	2	0	1	0
Bm151372	4	0	1	17	63	43	14	15	18
Bm324092	0	0	0	0	0	0	0	5	0
Bm224517	0	0	0	0	2.27	1	2	1	0.99
Bm086304	0	0	0	1	0	0	0	0	0
Bm035204	3	0	0	1	1	0	1	0	2
Bm222064	0	0	0	8	6	3	7	5	4
Bm117393	2	1	3	2	2	2	5	0	0
Bm244200	5	1	5	0	1	0	0	4	6
Bm001492	3	4	0	0	0	0	1	0	0
Bm115814	4	6.57	6	0	0	0	2.56	3	3.06
Bm252971	60.45	1011.71	64.74	18.35	10.64	3.46	30.56	17.93	43.93
Bm078745	2	1	1	0	0	0	0	6	4
Bm261368	1	2	2	1	0	1	1	0	1
Bm075144	0	0	0	0	0	2	0	0	0
Bm120391	3	0	0.96	1	0	0	1	5	0
Bm042615	0	0	0	5	8	1	9	0	1
Bm037845	0	0	0	7	1	0	6	7	5
Bm021152	0	0	0	0	0	0	5	1	4
Bm110552	249.72	195	262.56	349.46	318.87	257.01	326.59	409.33	238.2
Bm261239	21	18	21	9	7	9	17	12	13
Bm181633	0	0	0	16	16	24.15	14	13	12
Bm013432	0	2	1	0	3	0	3	2	0
Bm269577	3	0	9	0	0	0	0	0	0
Bm276392	4	3	2	2	0	0	2	1	2
Bm049384	13.1	41.38	20.54	181.71	163.93	159.38	482.98	328.55	518.4
Bm316851	80.63	59.67	85.31	134.8	131.3	129.75	105.19	116.99	133.68
Bm092059	2	1	4	0	0	0	0	4	3
Bm125724	0	0	1	0	0	0	1	0	0
Bm327681	1224	396	1351	1423	2222	1490	1427	1553	1787
Bm319316	33.78	112.84	40.51	2.59	0	2.17	0	2.51	12.85
Bm088445	32.94	73.35	28.79	42.89	10.71	0	19.53	15.05	36.84
Bm081344	6.2	13.6	2.3	3.43	3.46	2.37	5.95	2.28	2.37
Bm319447	10.05	51.88	17.62	44.85	52.16	54.46	25.92	39.87	72.55
Bm292559	4	0	2	0	0	0	0	0	0
Bm307858	0	0	0	2	1	0	2	1	4
Bm031590	0	0	0	97.86	126.63	172.27	103.39	77.4	38.56
Bm010784	3	3	12	0	0	0	0	0	0
Bm292876	0	0	0	0	0	0	0	5.54	0
Bm277156	1	0	1	0	1	1	3	2	4
Bm267921	3	0	3	2	0	0	0	0	0
Bm283372	0	0	0	1	0	6	0	0	0
Bm068695	7	0	6	0	0	0	0	0	0
Bm172781	68.95	34.1	136.72	76.38	121.54	0	50.1	128.06	0
Bm027288	0	0.93	0	7.66	0	0	0	0	0
Bm212513	4	0	2	3	1	0	0	1	0
Bm191565	0	9	0	1	1	0	0	0	0
Bm047529	154.01	193.9	192.16	233.58	254.6	220.23	252.19	243.5	193.99
Bm025197	5.77	20	6.9	21.04	16.04	17.5	13.63	12.69	23.23
Bm111416	246	485	348	46	39	31	92	79	84
Bm121047	2	6	6	0	1	1	11	6	6
Bm071631	141.53	151.56	121.03	108.58	72.04	76.64	82.42	103.8	94.56
Bm119313	0	7.74	0	0	5.62	0	5.71	0	0
Bm120482	174.84	105.92	55.26	95.17	45.2	207.93	381.42	310.72	262.99
Bm204710	0	0	0	2	1	0	4	2	0
Bm168147	0	1	0	0	0	1	0	0	0
Bm294195	0	0	0	17	16	21	18	5	3
Bm295442	0	0	0	2	2	4	0	3	0
Bm062007	0	0	0	2	12	7	2	0	0
Bm180935	6.18	10.09	5.35	31.58	22.35	43.96	21.23	15.35	14.97
Bm112386	3.54	3.47	3.49	6.77	16	6	15	3	11
Bm072076	0	0	4	35	78	70	59	36	30
Bm177231	0	0	0	0	0	0	0	1	0
Bm330741	0	0	0	4	3	9	6	4	3
Bm335058	22	39	25	10	2	5	13	30	29
Bm065627	33	14	25	2	6	1	2	3	2
Bm064553	0	0	0	0	1	0	2	0	0
Bm074551	0	0	1	0	0	0	0	0	0
Bm178846	0	0	1	0	6	2	1	5	4
Bm081591	0	0	0	4.48	0	0	0	0	0
Bm215792	3	0	4	1	0	0	2	3	1
Bm013535	0	0	0	1	0	0	0	0	0
Bm255699	1	2	0	4	0	4	0	0	5
Bm038584	11	18	13	0	1	8	0	2	0
Bm287655	0	1	0	0	0	0	1	0	0
Bm232006	0	0	0	2	0	1	3	1	0
Bm183900	184.74	70.67	241.61	688.88	655.44	579.56	772.87	791.33	697.52
Bm070214	0	0	1.84	1.64	0	0	0	0	4.49
Bm191780	5	0	2	0	1	2	0	1	2
Bm148474	3	0	1	0	0	0	0	3	6
Bm273085	125	92	157	1142	1139	1336	646	920	1092
Bm304513	4	6	7.55	5.45	8.94	7.86	8.31	13.56	3.8
Bm272340	23.88	27.8	60.82	77.8	45.26	32.01	18.94	38.08	21.37
Bm192666	0	4.69	0	0	0	1	0	0	0
Bm079930	0	3.19	0	0	0	2.23	0	0	2.32
Bm323743	6.9	17.25	26.44	2.89	0	0	8.13	2.04	3.09
Bm076297	0	0	0	0	0	4.18	0	7.61	3.05
Bm236601	22.25	47.48	39.23	0	0	0	0	12.17	5.11
Bm194898	0	0	0	0	1	3	5	3	1
Bm176691	0	0	0	1	5	2	0	1	3
Bm121108	0	0	10.5	0	0	20.08	0	34.3	16.17
Bm137121	0	0	0	0	5.61	0	0	2	0
Bm068127	0.02	24.62	54.29	0	0	0	0	0	12.39
Bm327497	164.19	96.48	180.63	301.24	496.78	221.78	147.52	110.21	197.71
Bm324917	76.64	179.72	90.19	66.97	64.7	51.37	80.35	102.3	67.02
Bm166281	0	5	2	0	0	0	0	1	0
Bm243163	8	0	13	0	4	5	0	2	3
Bm230783	0	0	0	0	0	0	1	0	0
Bm179166	0	0	0	5	5	2	0	1	4
Bm018598	0	0	0	2	5	2	22	4	2
Bm243680	0	29	0	0	0	0	0	0	0
Bm225964	0	0	0	3	4	1	24	7	9
Bm301128	0	0	0	0	2	0	0	0	0
Bm311515	233.61	9.4	228.39	228.42	134.54	248.71	223.45	191.26	163.51
Bm176212	0	1	0	44	0	0	27	0	0
Bm080058	202.97	132.2	147.83	0	0	0	0	0	0
Bm227413	8.77	18	26.36	0	0	1	0	50	31.25
Bm239266	0	1	1	0	0	0	4	0	2
Bm114433	2	3	1	4	3	0	0	2	1
Bm221597	5	2	5	0	0	0	0	8	5
Bm011258	337.85	429.52	373.09	432.61	391.72	377.63	483.31	393.23	516.27
Bm183145	2	6	2	0	0	0	5	2	6
Bm215401	0	0	0	697	0	0	1065	0	0
Bm222081	0.57	0	12.52	0	3.38	0	0	0	0
Bm153324	52.92	41.67	73.01	34.31	44.86	35.21	78.66	42	45.99
Bm315707	11.96	6.59	19.68	21.46	14.13	12	16.53	9.47	14.92
Bm043682	0	0	0	0	6.04	0	6.14	0	0
Bm198918	620.4	686.04	698.29	2650.07	2327.04	2155.22	2475.93	2613.75	2376.36
Bm245244	0	0	0	1	0	2	7	4	3
Bm038105	0	0	0	13.65	0	0	0	6.25	1.97
Bm227694	0	0	0	8	17	17	46	31	14
Bm044180	39	7.05	29	56.45	76	26.4	38.52	89	67.07
Bm221239	0	0	0	3	3	0	0	0	0
Bm274940	0	0	0	5	0	0	0	1	5
Bm018524	0	0	0	7.29	34.33	31.58	5.35	6.5	6.11
Bm212468	5.38	15.24	8.2	16.15	0	26.79	31.11	19.13	21.89
Bm075056	0	0	0	2	1	3	0	0	1
Bm098045	2	6	4	0	0	0	0	1	0
Bm140313	234.86	143.98	286.7	1607.96	1840.45	1684	1274.99	1605.94	1313.85
Bm102128	0	0	0	6	15	5	0	0	0
Bm095039	4	6	0	0	1	2	3	2	6
Bm039829	2	0	0	0	0	0	0	6	0
Bm205841	1	0	0	1	1	5	0	1	0
Bm058408	4.09	8.45	3.03	0	1	2	1.01	0	3.02
Bm260289	7	0	4	0	0	0	0	0	0
Bm131777	0	0	0	0	1	1	3	2	0
Bm302666	0	0	0	0	0	0	2	0	0
Bm313670	0	0	4.29	8.83	0	2.1	2.69	2.26	0
Bm059549	22.11	46.81	33.17	13.04	5.6	15.03	23.09	31.31	29.97
Bm205105	21.66	28.56	22.34	10.52	6.91	0	3.68	9.2	9.35
Bm160691	2	0	1	1	3	0	0	1	0
Bm137985	87.02	107.94	88.61	91.78	107.97	78.66	76.4	76.9	107.85
Bm298280	0	0	1	0	0	2	1	1	2
Bm133874	8	7	8	4	2	3	2	1	3
Bm136341	44	191	53	1065	946	869	381	251	394
Bm060258	73.33	34.83	50.98	97.27	92.04	131.17	120.84	151.68	92.71
Bm217520	34	90	35	6	12	0	10	4	6
Bm234972	163.89	192.46	180.22	55.07	59.86	34.92	77.99	75.87	54.34
Bm282440	0	0	4.88	0	0	3.99	0	0	8.76
Bm176947	0	3	0	1	0	0	3	0	0
Bm222857	10	1	15	0	0	0	0	12	16
Bm076120	0	3.19	0	0	6.59	0	2.62	0	2.6
Bm067296	0	0	0	0.01	8.86	0	0	0	0
Bm312959	0	2	4	0	0	0	0	0	0
Bm226681	0	0	0	4	2	0	0	2	0
Bm071161	1.22	1.59	8	0	7.94	0	4.31	7.39	0
Bm251265	7.25	19.96	0	31.51	37.26	35.09	45.48	31.95	22.64
Bm290360	14	5	20	6	19	16	9	13	10
Bm206235	0	0	0	14.47	0	5.95	10.16	0	0
Bm241948	13.26	7.73	15.57	9	4	11	4.83	8	5
Bm256608	0	0	0	0	1	1	6	0	0
Bm096645	21	11.67	21	11	9	7	2	8	4
Bm004722	0	3	0	0	0	0	0	0	0
Bm281958	35.93	40.03	34.42	29.75	34.66	37.73	16.18	29.06	13.88
Bm239979	87.36	67.59	118.71	69.8	100.38	57.2	61.3	89.15	78.89
Bm003449	11.81	0	15.8	0	0	0	0	0	0
Bm238518	2	6	0	4	1	4	2	2	6
Bm215373	0	0	0	2	1	0	0	1	1
Bm265248	49.85	47.58	40.13	32.63	39.42	29.22	26.56	36.11	22.98
Bm146659	276.55	318.69	297.11	221.41	273.89	145.08	217.8	193.52	241.93
Bm106042	16	0	22	0	3	9	0	10	8
Bm217538	0	5.85	0	0	0	0	0	0	30.39
Bm295729	5	0	1	2	8	3	8	6	6
Bm213184	16.61	16.11	4.1	12.41	5.69	0	10.35	13.63	0
Bm290344	23.89	27.77	45.98	60.85	24.61	51.25	48.14	28.52	45.25
Bm019848	1004.7	1878.85	1196.18	278.99	263.17	251.37	478.34	469.55	520
Bm239399	22.13	19.56	27	0	0	0	0	0	0
Bm053560	0	0	0	0	1	2	0	1	1
Bm183784	135.62	175.7	136.98	53.82	87.79	59.73	54.95	56.97	65.62
Bm022125	0	0	0	11	19.3	8	6.47	1	2
Bm170294	66.03	110.36	108.08	75.59	63.69	84.98	54.98	73.84	61.07
Bm169367	0	0	0	40.04	0	0	0	0	0
Bm090530	0	0	0	109	0	0	0	0	0
Bm186850	0	3	1	0	0	0	0	0	2
Bm119433	2	4	4	0	1	0	0	0	0
Bm118939	1	3	3	17	18	12	8	17	9
Bm125598	3	1	7	0	0	0	0	0	0
Bm152039	2	3	1	0	0	0	0	0	0
Bm035637	89.51	112.36	222.67	0	31.01	0	24	32.29	46.62
Bm150744	23.99	39.26	35.5	35.5	5.34	14.7	36.65	14.92	22.3
Bm025005	63.66	125.53	75.27	8.32	17.69	10.6	19.16	29.07	21.9
Bm262059	0	0	0	0	7	3	2	0	1
Bm107941	0	0	0	7	1	2	3	2	1
Bm237016	4	7.01	1.06	6.96	2.17	3	8.12	5.22	8
Bm138015	4	0	5	0	0	0	0	7	5
Bm102564	20.12	87.33	16.91	284.49	443.57	269.62	171.06	126.04	224.54
Bm124210	3	3	1	0	0	0	2	0	0
Bm271355	5.54	11	12.74	15	5.81	11.69	11	18	10
Bm311371	19.78	0	21.27	0	0	0	0	11.7	15.06
Bm042354	179.86	209.29	231.58	113.24	133.01	103.29	90.27	90.97	120.02
Bm225265	64.94	60.92	53.18	106.89	92.88	80.61	75.64	85.09	66.05
Bm124491	3.88	0	0	0	0	2.75	0	0	7.97
Bm030620	0	0	0	1	9	1	4	1	2
Bm219724	0	0	1	0	0	0	0	0	0
Bm010212	3.68	2.44	5.39	13	5.3	9	0	5	3.3
Bm160556	0	0	0	4	2	2	2	0	5
Bm245287	15.37	6	20.89	1	0	1	0	28.99	18.39
Bm180963	157.93	187.19	180.73	135.88	107.82	67.52	111.83	76.29	88.35
Bm291884	20.98	23.91	9.31	0	6.03	12.07	5.31	7.37	12
Bm292651	0	0	0	6	7	1	3	8	2
Bm134171	0	0	0	4	9	8	25	3	2
Bm083712	0	15	0	0	0	0	0	0	0
Bm161166	0	0	0	0	0	1	0	0	0
Bm114271	14.46	5.17	9.85	0	0	0	0	0	20.12
Bm224640	1	0	0	2	7	2	0	2	0
Bm239315	1	1	0	2.19	0	1.89	5.05	0	1
Bm001860	0	0	0	0	0	0	0	1	2
Bm127466	3	2	1	0	0	0	0	0	5
Bm167738	25	47	21	25	13	18	25	18	22
Bm115866	0	0	0	0	2	3	2	0	0
Bm333083	37.08	109.32	45.07	3.99	1.87	6.87	7	13.67	10.8
Bm097358	0	0	0	0	0	0	0	2	2
Bm266169	0	4	1	0	4	1	0	0	1
Bm320617	14.04	9.68	18	12.3	5.32	23.94	24.31	12.33	10.47
Bm076379	1.75	0.72	0	16.53	2.1	10.61	0	8.54	2.27
Bm308865	3	0	1	191.63	225.7	119	164.9	35.86	41.84
Bm060160	1	6	1	0	0	0	0	0	0
Bm216778	0	0	0	0	0	0	3	2	2
Bm154528	0	10	0	4	0	0	9	0	0
Bm289118	167.26	210.35	166.28	86.72	99.34	82.71	133.68	153.22	134.07
Bm101947	173.63	97.76	120.83	106.48	103.12	80.68	114.88	181.97	153.61
Bm280142	0	0	0	5	28	13	14	0	1
Bm043929	6	7	5	0	0	0	0	0	0
Bm188283	0	0	0	6	4	4	3	6	5
Bm203328	200.09	406.68	252.11	293.46	305.88	262.83	281.73	325.38	253.61
Bm191935	0	0	0	2	2	1	3	1	4
Bm227954	4	2	3	0	3	1	2	1	0
Bm278034	10.04	9.19	15.14	25.9	23.47	23.59	15.1	16.5	21.63
Bm083022	21.82	42.02	40.1	33.64	17.24	13.09	38.31	25.2	21.01
Bm095268	0	0	0	6	10	10	5	3	4
Bm097397	2	5.7	2.54	2	5.7	0	3	5	2
Bm006416	0	0	0	11	0	0	0	0	0
Bm221345	0	2.63	5.34	0	0	0	5.87	0	0
Bm075800	29.63	10.23	50.23	93.49	130.98	53.65	59.97	95.98	74.27
Bm051388	1	2	12	2	2	3	0	4	3
Bm024957	0	4	1	0	0	0	0	0	0
Bm327765	0	0	0	2	0	5.02	0	0	54.38
Bm264937	0	0	0	1	0	1	1	5	0
Bm286078	0	0	2.4	0	0	0	0	0	0
Bm164218	9.53	17.49	20.9	12.61	7.36	4.3	0	6.35	11.34
Bm095677	0	10	0	0	0	0	0	0	0
Bm086998	0	0	0	0	2	2	2	0	0
Bm252743	58	31	30	3553	3947	3782	2722	1939	2154
Bm307191	2	5	3	6	7	8	18	10	16
Bm174888	4	5	5	2	0	0	1	2	0
Bm094479	0	0	0	63.28	49.2	37.27	17.25	19.62	15
Bm226586	0	0	0	7	19.44	7	21.19	0	1
Bm097098	80	106	91	226	183	178	118	143	143
Bm112582	0	0	0	0	2	1	4	0	0
Bm251708	0	3	0	0	0	0	0	1	0
Bm254950	0	0	0	4	2	2	0	0	1
Bm258009	1	12	4	3	0	1	1	1	2
Bm137832	0	0	0	1	2	2	0	2	5
Bm021581	368.48	527.48	465.47	299.06	120.99	154.44	377.88	119.77	198.21
Bm136254	1	4	1	0	0	0	0	0	0
Bm328169	1	0	0	0	0	0	0	0	0
Bm206317	193.65	106.06	228.49	322.26	294.24	272.04	261.9	308.14	311.67
Bm188901	3	1	3	0	0	0	1	4	7
Bm024304	1	0	0	4.95	6.7	5.43	0	1.99	1
Bm152568	1	3.6	3	4	2	3.61	4	1	0
Bm038162	157.03	234.71	200.09	127.77	127.86	100.23	122.61	103.48	127.88
Bm103786	2	0	2	0	0	5	0	0	0
Bm148107	37	16	32	0	3	0	1	50	37
Bm051246	3.38	2.55	0	0	1	2.24	0	0	2
Bm018863	108	444.06	108	80	89	90	104	173	148
Bm196504	7	6	5	0	0	0	0	0	0
Bm126423	0	0	0	3	0	1.31	0	3	0.59
Bm007341	78.91	128.72	50.68	0	31.47	22.5	13.08	75.35	26.21
Bm305287	0	0	0	0	1	0	3	1	0
Bm298288	0	0	0	11	11	13	20	4	3
Bm097262	0	0	1	46	43	11	19	25	37
Bm112303	0	0	5	16.67	14.22	9.33	12.12	13.33	2.79
Bm331499	12	14	12	5	9	3	10	4	5
Bm018226	11	11	11	4	12	5	18	10	20
Bm146526	3	2	6	6	10	5	5	4	5
Bm105404	0	0	0	0	3	3	0	0	0
Bm270494	0	12	0	8	0	0	9	0	0
Bm179848	0	3	0	0	0	0	0	1	0
Bm155012	8	2	0	0	0	0	0	11	6
Bm120487	120.62	161.05	161.17	241.87	271.53	226.02	278.26	366.92	388.95
Bm030562	0	0	0	1	2	0	0	1	0
Bm324419	31	13	32	45	46	23	20	16	14
Bm273433	2	3.1	1.33	4.37	3.76	2	4	5	6.48
Bm045160	3	10	5	1	0	0	0	2	1
Bm320019	0	3	0	0	0	1	1	0	2
Bm085115	14	25	26	8	6	3	11	10	9
Bm214720	2.26	15.9	11.89	2.8	6.38	0	0	5.56	4.55
Bm056253	0	1.39	1.3	63.91	59.3	57.48	101.84	70.76	54.72
Bm048249	55.31	47.39	108	17.36	12.59	10.61	45.57	27.7	16.11
Bm091614	0	0	1	0	1	1	0	0	0
Bm250922	6	4	4	2	2	3	1	0	3
Bm180828	0	9	0	0	0	0	0	0	0
Bm137163	0	0	0	6.25	9.49	8	11	2	3
Bm080692	0	0	1	1	1	1	0	1	2
Bm069805	0	0	9.31	0	0	0	0	3.02	1.7
Bm156820	18.92	0.52	25.41	59.29	41.9	24.88	22.68	55.42	25.3
Bm130899	43.39	150.72	72.05	116.37	71.37	81.95	71.09	65.37	66.35
Bm215893	7.45	0	7.87	0	0	0	0	49.3	1.02
Bm167241	0	0	1	33.75	46.02	35.96	86.95	29.87	28.49
Bm302264	6	0	1	19	39	15	12	10	20
Bm320243	2	2	0	0	0	0	0	0	0
Bm229043	3	0	0	2	11	4	32	11	11
Bm027399	0	0	0	0	0	0	0	0	1
Bm273298	0	3	0	0	0	0	0	0	0
Bm161722	465.14	596.08	689.66	790.97	724.93	736.51	754.39	685	753.8
Bm256897	2	0	4	0	3	0	0	0	0
Bm150892	5	0	8	0	5	2	0	5	4
Bm229543	0	0	0	2	0	0	0	3	0
Bm021474	271.94	322.58	303.95	251.29	286.44	232.13	279.9	263.91	302.36
Bm071439	0	0	0	20	0	0	0	0	0
Bm024337	0	0	0	0	3	1	1	1	1
Bm251314	0	4.24	5.06	0	3	0	1.09	0	2
Bm012103	1	0	0	4.84	0	0	0	1	0
Bm210517	0	0	2	0	0	0	0	2	4
Bm178845	32.47	40.18	24.59	12.6	21.74	17.5	14.01	34.25	11.99
Bm214434	24.57	57.58	0	15.57	8.24	0	9.11	14.5	5.1
Bm011192	0	0	0	0	2	2	1	0	1
Bm094853	0	1	4	0	2	0	1	0	0
Bm191442	0	0	1	0	0	1	0	1	0
Bm002740	4.92	5.62	0	3.99	0	0	0	0	0
Bm052722	0	0	0	0	0	0	0	2	0
Bm075066	75	48	101	251	263	204	191	120	244
Bm057575	0	0	0	16.25	20	24.94	24.31	20	16
Bm322883	0	0	0	0	1	0	4	4	1
Bm112893	30724.99	16497.99	35522.99	2605.99	3509.99	2442	4514	3131.99	5419.99
Bm321952	0	11.22	0	0	0	0	0	0	0
Bm138819	0	0	0	3	0	0	4	0	0
Bm158123	6	0	14	0	1	2	0	3	1
Bm227105	17.24	17.43	71.5	0	0	0	0	55.21	14.1
Bm046151	0	3	0	5	0	0	6	0	0
Bm272471	0	23.44	0	0	0	0	0	0	0
Bm262240	0	0	0	1	2	0	0	0	0
Bm240173	18.9	41.23	18.48	13.23	25.24	23.26	23.36	27.13	21.63
Bm333783	0	10	2	0	1	0	0	1	0
Bm084196	13.11	21.6	2.3	0	0	1	5	2.36	0
Bm333375	2	1	4	0	0	0	0	0	0
Bm156858	0	1	0	0	0	0	1	0	0
Bm281002	8.3	80.12	30.62	5.91	0	7.76	5.39	9.15	3.23
Bm061075	3	4	0	0	0	0	0	0	0
Bm326467	2	0	3	0	4	0	0	0	0
Bm301060	12	0	10	0	0	0	0	0	0
Bm157926	86	88	112	127	106	110	63	64	58
Bm251353	5	11	4	20	11	7	4	4	6
Bm133072	38.64	31.09	25.28	31.54	18.04	35.36	35.14	46.52	25.95
Bm052001	28	9	24	1	0	0	0	25	33
Bm031337	0	0.1	0	0.51	0	1	0.77	1.58	0
Bm307780	130.65	311.16	201.59	124.04	116.55	35.73	143.24	193.22	220.09
Bm322277	0	0	0	2	2	3	0	1	0
Bm216071	255	233	300	278	317	329	261	287	299
Bm097669	10	3	28	1	0	0	0	1	8
Bm055219	0	0	0	34.92	32.05	7.28	37.75	56.93	44.26
Bm134428	0	0	0	1	5	7	7	7	10
Bm000402	5	15	8	2	0	0	2	1	0
Bm136437	0	0	0	10	1	3	2	5	3
Bm068344	0	2	3	3	2	2	3	1	1
Bm168377	53.59	4.69	32.44	0	0	0	0	25.5	20.43
Bm248479	17.4	40.46	38.24	5.25	9.53	9.89	8.04	18.91	4.95
Bm210037	0	0	0	0	6.17	0	0	0	4.6
Bm253143	0	0	2	0	0	1	1	0	4
Bm127149	7.37	5.91	0	1.19	1.5	1.58	0	0	0
Bm192972	5.7	23.55	7.1	0.72	3.05	2	6.96	4	5.66
Bm209113	6	4	2	3	0	2	1	7	3
Bm057163	2	1	0	0	2	1	0	0	3
Bm027093	0	0	14.22	0	0	0	0	12.62	21.77
Bm311237	0	0	2	0	2	0	0	2	2
Bm069725	1	3	6	0	0	0	0	0	0
Bm306814	7.94	21.74	15.95	35.84	44.82	27.97	38.03	39.36	25.17
Bm107126	18.17	3.99	9.4	53.26	50.05	49.13	71.89	125.2	66.32
Bm334452	0	0	0	0.01	0	0	4	0.02	0
Bm051158	0	0	0	5532.67	5613.54	5102.65	508.66	626	520
Bm167295	0	0	0	9	0	0	0	0	0
Bm008081	4	3	14	0	5	0	0	0	0
Bm100725	14.09	8.35	20.28	0	10.16	0	18.36	4.3	0
Bm149346	3.16	3.39	0	0	4	0	0	1.75	0
Bm005021	0	3	0	4	9	5	1	3	1
Bm328824	2	0	0	0	0	0	0	0	0
Bm103677	13	0	21	0	4	0	0	0	0
Bm181480	0	0	1	3	0	0	0	0	2
Bm161633	9	6	8	0	1	0	3	13	5
Bm308576	2	0	0	2	2	1	2	1	4
Bm241108	5	5	4	3	6	2	2	2	3
Bm194265	4.34	17.29	13.34	6.76	11	7	5.08	10.07	5.74
Bm203812	2.49	0	0	0	0	2	0	0	0.49
Bm049116	0	0	0	0	44	39	0	31	46
Bm302748	0	2	2	0	0	0	1	0	3
Bm206786	0	0	0	0	0	12	0	0	0
Bm089411	2	0	4	4	3	2	2	1	2
Bm052203	2	0	2	0	0	0	0	7	1
Bm097356	2	0	0	2	2	1	0	1	0
Bm261185	0	0	0	3	0	5	1	0	0
Bm019126	0	0	0	0	0	0	5.39	0	0
Bm302812	6.72	34.38	2.32	2.58	1.15	1.12	2.35	6.71	1.04
Bm208255	40.82	32.68	75.71	69.3	88.1	65.86	44.21	25.28	132.86
Bm102271	0	2.24	2	0	1	0	3	0	2
Bm332498	60.32	59.99	72.82	28	40.45	19	54.4	42.76	65
Bm225018	0	0	0	4	5.36	2.74	8	13	13.03
Bm270811	170.71	104.9	94.64	277.58	365.52	264.76	179.6	196.33	515.44
Bm040328	110.98	122.38	122.96	2.56	0	1	56	37	45
Bm207309	0	0	0	0	0	0	1	0	0
Bm053830	0	0	0	5.61	2.73	1.08	5	2.9	2
Bm304708	150	294	188	26	17	22	38	48	36
Bm036828	1	9	0	0	1	0	5	6	4
Bm012670	0	0	0	0	0	0	1	0	0
Bm042054	0	0	0	2	5	5	2	3	6
Bm047982	0	0	5	0	0	0	0	0	0
Bm200100	0	2	0	0	0	0	0	0	0
Bm264934	1.8	5.41	3.92	0	1.6	0	0	0	1.71
Bm167695	23.07	0	6.91	0	14.07	0	0	19.51	16.33
Bm058578	523.68	595.04	550.96	717.93	625.68	635.92	1346.31	904.95	1846.88
Bm150133	26.86	111.68	9.61	34.19	10.18	0	15.97	13.28	0
Bm072004	19.06	4.98	17.55	72.77	56.08	50.57	72.92	49.13	45.1
Bm290794	0	2	0	6	0	0	4	0	0
Bm205945	8.74	6.79	4.59	0	0	0	1.16	0	0
Bm236530	114.69	10.45	9.46	0	0	0	0	45.32	0
Bm084102	8.97	7.09	19.98	10	16.95	19.79	16.12	12.53	6.49
Bm095849	4.25	0	0	0	0	3.24	0	0	0
Bm300932	0	0	0	7.87	3.99	5.01	6.75	9	2
Bm086930	1	0	0	4	2	2	1	1	1
Bm057307	0	0	1	5	4	17	1	1	2
Bm040039	4	0	2	0	0	0	0	1	0
Bm152057	0	0	0	6	0	0	4	0	0
Bm002072	0	0	0	3.82	5.79	3.24	1.82	0	0
Bm025508	0	0	3	0	0	0	0	2	0
Bm066024	364	281	435	53	32	28	29	26	33
Bm327701	0	0	0	15.52	31.66	11.71	6.92	0	0
Bm291432	0	0	0	2	0	0	0	0	0
Bm164848	4	4	4	0	0	1	0	1	0
Bm209527	34.02	22.31	82.08	72.37	85.42	75.83	71.02	98.95	45.94
Bm271453	0	0	0	1	8	0	3	0	0
Bm014724	3	3	2	9	0	1	3	2	1
Bm197783	4	4	2	0	1	0	0	0	0
Bm030282	3	3	4	0	0	0	0	0	0
Bm234568	202.2	207.5	241.55	120.43	158.55	79.35	174.63	227.41	175.52
Bm286578	0	6	0	0	0	0	0	0	0
Bm314392	0	9.08	3.27	0	1.81	0	1.85	0	0
Bm139211	0	1	0	5.68	5.05	3.97	4.48	3.07	3
Bm321778	2	0	2	1	1	2	3	0	1
Bm166221	48.64	43.03	37.76	14.54	29.17	23.07	12.03	24.16	36.88
Bm198210	0	0	1	2	6	2	0	1	1
Bm184576	0	0	0	0	0	0	16.27	9.22	3.81
Bm183896	2	0	2	3.54	0	7	0	0	12
Bm062850	49	83.76	52.44	2	4	6	4	1	6
Bm059475	6	1	6	23	9	6	5	3	5
Bm134308	70.89	101.48	59.84	0	11.78	7.02	21.82	13.31	7.37
Bm237831	0	0	0	8	6	19	12	6	6
Bm136337	8.8	22.98	0	6.8	0	2.42	0	13.04	9.49
Bm057029	1.24	1.35	0	0	3	0	1	0	0
Bm208966	0	0	0	7	0	0	9	0	0
Bm000550	39.19	9.2	39.39	7.55	7.21	0	11.11	4.1	10.42
Bm156685	10.11	68.56	84.76	2.71	0	14.88	23.74	20.8	7.52
Bm105612	0	0	3.17	1.9	5.63	0	0	1.33	0
Bm300337	4.26	2.44	0	0	0	0	0	18.75	5.66
Bm204665	30.88	35.08	57	38.7	26.46	24.06	32.12	42.35	23.22
Bm310956	16	1	31	0	0	0	0	0	0
Bm326290	9	4	17	27	16	19	13	17	15
Bm000710	1	1	0	0	3	0	0	1	0
Bm188571	0	17	0	22	0	0	15	0	0
Bm325852	0	0	0	8	2	6	4	12	15
Bm261646	7.24	0	0	3	8.34	1	0	43.64	0
Bm276434	0	0	0	11	0	0	12	0	0
Bm179186	0	0	0	1	0	1	3	0	1
Bm022109	0	11.98	0	0	0	0	0	0	0
Bm005064	6	0	3	0	0	0	0	3	8
Bm292232	13	6.57	18.46	0	0	0	0	17.23	12.65
Bm105025	0	0	0	0	0	0	0	1	2
Bm026033	29.27	46.46	29.49	22.92	9.43	0	12.67	0	26.16
Bm151842	8	8	8	4	1	2	3	1	2
Bm328597	0	0	0	2	3	0	0	0	0
Bm290238	261	378.15	297.99	40.9	29.93	39	53	70.97	61
Bm022779	1	0	3	0	0	2	0	0	1
Bm103345	17.53	8.77	29.57	4.05	11.02	14.21	3.78	7.88	11.95
Bm085344	6	0	2	0	1	0	0	2	0
Bm239589	59.04	64.65	59.76	26.88	6.13	0	0	0	3.97
Bm226448	45.63	21.6	70.49	1	2	1	0	41.81	58.34
Bm280962	0	55	0	0	0	0	0	0	0
Bm068095	0	3.61	3.06	2.2	2.44	6.69	10.57	4.53	5.5
Bm200459	2	0	0	0	0	1	0	1	0
Bm095154	7.45	18.84	7.94	5.43	0	2.05	5.15	0	6.59
Bm297577	0	0	0	3	4	2	7	8	9
Bm223152	0	0	0	9	27	17	34	5	11
Bm035115	0	0	1	0	1	2	0	6	1
Bm150676	9	0	4	12	9	3	8	28	47
Bm193987	0	5	2	2	0	0	0	0	0
Bm130903	0	0	0	42	8	3	19	20	2
Bm304651	24.43	6.58	25.07	32.42	35.8	39.21	32.13	51.42	41.89
Bm027767	0	0	0	6	6	4	6	3	0
Bm161807	10.02	68.03	31.63	30.96	8.33	17.35	61.78	19.9	11.4
Bm171444	0	8	0	0	0	0	0	0	0
Bm025154	1	0	0	0	0	0	1	5	1
Bm186221	6.81	116.45	14.63	5.07	4.9	6.69	10.89	4.42	7.11
Bm107689	0	0	0	4	3	0	4	0	3
Bm283740	0	12	0	8	0	0	21	0	0
Bm178237	0	0	0	4	1	0	4	0	4
Bm311318	0	0	0	4	18	19	5	6	3
Bm151438	97	127	121	64	92	67	78	104	107
Bm269588	0	0	0	1	1	4	6	5	4
Bm067138	47	49	49	39	41	28	38	26	46
Bm319868	0	0	0	0	0	1	0	0	0
Bm103972	0	0	0	3	2	0	0	1	1
Bm021826	1.03	1	0	1.01	6.08	3.02	4.06	2.03	0
Bm001226	11.06	3.84	33	1	1	0	0	15.17	9.44
Bm328777	0	0	0	2	7	2	2	0	0
Bm266150	0	0	0	2	0	0	1	0	0
Bm235321	55.02	181.22	110.68	63.01	50.45	50.83	111.8	274.99	176.84
Bm092639	0	2	0	3	0	0	9	0	0
Bm180765	0	0	0	12.57	23.84	15	12.45	9.59	9
Bm296004	0	0	0	2	21	6	14	3	5
Bm082109	21	5	24	0	1	0	0	0	0
Bm323277	7.33	93.79	24.72	0	0	2.59	10.67	11.53	0
Bm156173	0	0	0	11	22	10	29	17	18
Bm003989	5.12	0	0.57	42.08	92.62	57.01	13	42.02	30.48
Bm205031	8.66	5.18	4.29	0	2	1	2	2	0
Bm086451	0	0	0	1	2	0	0	0	0
Bm094967	0	1.35	3	0	1	1	1	1	1
Bm016089	389	324	443	130	100	69	264	347	363
Bm173225	1	2	3	2	2	0	0	0	1
Bm085445	0	0	0	16	0	0	24	0	0
Bm027808	40.15	104.45	35.72	25.63	20.71	21.74	32.55	44.48	29.39
Bm248770	4	1	6	11.63	30	10	12	16.99	9
Bm004851	0	0	6	1	0	0	0	6.15	10.63
Bm090118	0	0	0	0	8	0	3	1	2
Bm319312	0	3.38	4.07	1.17	1.11	0	2.12	1.09	5.28
Bm118537	0	0	0	0	6.21	0	0	8	4.22
Bm318643	1	0	2	0	0	0	0	1	0
Bm280083	0	7.35	0	12.92	4.29	4.4	0	0	0
Bm336659	0	0	2	0	3	2	2	2	1
Bm305737	8.31	11.97	30.32	12.74	21.7	4.65	10.4	25.36	20.3
Bm277868	0	2	15.17	0	0	3.43	0	0	0
Bm074915	0	0	0	2.6	0	4.88	3.22	0	0
Bm096733	0	15.47	0	0	20.6	24.04	0	9.52	0
Bm006068	2.39	2.72	5.27	0	0	0	0	0	0
Bm183893	8.28	19.35	1.64	0	0	0	0	3.39	1.47
Bm013266	0	0	0	1	0	0	0	0	0
Bm306849	1	4	0	0	0	1	2	1	0
Bm026745	0	1	0	0	0	0	1	0	0
Bm185486	0	1	1	0	1	0	0	0	0
Bm017820	0	0	4	5	0	0	0	0	2
Bm169348	471.89	828.01	415.67	3068.8	2358.71	2486.52	2481.28	1196.92	1793.86
Bm321992	642.52	140.33	762.44	1839.88	2144.17	1147.57	1895.3	2246.51	2478.48
Bm129895	2	0	1	0	1	0	0	1	1
Bm122821	0	0	0	0	1	0	1	2	1
Bm026976	0	0	0	4	2	8	3	0	2
Bm080207	66.11	161.59	71.06	26.26	13.05	14.17	35.43	11.13	37.35
Bm289197	0	0	0	0	3.86	0	0	0	0
Bm131588	8.64	0	1.56	0	0	0	1	11.01	7.46
Bm147423	0	0	0	4	1	2	0	2	4
Bm260651	0	0	0	0	0	0	0	0	30.07
Bm196992	2	0	0	9	0	0	0	0	2
Bm027668	91.58	273.12	105.99	79.54	75.09	54.78	103.56	75.64	71.08
Bm290663	1	0	0	2	1	2	2	0	1
Bm167417	0	0	0	3	0	0	5	0	0
Bm309098	4.4	2.99	4.45	2	0	2.53	3.34	0	0
Bm036782	11	2	18	0	0	0	0	16	15
Bm244339	3	4	0	0	1	0	0	1	0
Bm120706	3.06	0	2.73	3.02	0	0	5.35	0	5.97
Bm252045	0	0	0	0	2	0	0	0	0
Bm120443	145	131	166	88	87	86	79	119	71
Bm212044	0	2	5	0	0	1	0	0	0
Bm310025	1	1	0	0	0	0	1	0	0
Bm126850	0	0	0	4	0	0	5	0	0
Bm308418	10	16.3	6	0	2	4	7	6.8	0
Bm292923	8.02	0	0	0	3	2	0	0	110.59
Bm325339	15	0	13	0	0	0	0	0	1
Bm270793	0	0	1	0	0	2	0	0	0
Bm056199	0	0	0	0	0	0	1	0	0
Bm179402	2	3	6	0	0	0	0	0	0
Bm255013	0	0	0	7	14	16	44	32	27
Bm037823	0	0	0	7	12	8	1	3	6
Bm021420	2	5	3	2	2	0	3	1	1
Bm103952	0	44.62	22.17	0	0	0	2.77	0	3.74
Bm006964	389.17	513.3	459.83	457.28	469.22	463.52	590.84	602	625.84
Bm066086	0	7.04	2.99	0	7.88	0	12.16	0.44	0
Bm197352	0	14	0	0	0	0	0	0	0
Bm033148	0	0	0	14.77	1	2	0	0	3
Bm065255	0	0	0	0	2	1	4	0	0
Bm013435	9	23	17	3	6	1	2	1	0
Bm283451	0.24	0	0	0	0	0	2.71	0	2
Bm109378	4	1	0	286	324	230.92	424	385.62	431.29
Bm029050	0	8.42	3.53	2.1	0	2.18	1.58	1	0
Bm124330	5	0	9	12	47	28	11	18	21
Bm292173	0	11	1	5	0	2	1	2	0
Bm229612	0	3	0	3	0	0	10	0	0
Bm186480	7.38	0	22.15	0	0	0	0	0	0
Bm212949	0	0	0	7	3	5	3	1	4
Bm197380	0	0	0	1	2	0	0	0	0
Bm109090	0	0	0	26.72	41.8	51	32	14	19
Bm046129	9	1	12	0	1	3	0	0	0
Bm158504	151	120	168	266	165	202	167	181	148
Bm251768	5	1	1	0	0	0	2	0	3
Bm204432	3	5	1	0	0	3	0	0	0
Bm218147	0	0	0	0	6	1	2	4	2
Bm036170	0	3.69	4.03	0	0	0	11.21	0	8.41
Bm295506	0	5	0	0	0	0	1	0	0
Bm277037	4.5	3.05	5.28	1.96	2.13	0	2.58	3.56	0
Bm306166	9	1	3	1	0	0	0	0	0
Bm064137	1	0	0	0	0	0	0	0	0
Bm011105	285.81	209.76	344.4	154.34	132.64	171.68	153.99	176.05	149.44
Bm037761	0	1	2	0	0	0	0	1	7
Bm113109	0	0	0	1	1.71	1.92	0	0	0
Bm209473	0	0	0	30.81	34.17	21.3	64.27	46.06	35.13
Bm104344	3	0	1	1	4	1	0	0	1
Bm166067	0	53.85	0	13.83	32.04	8.67	18.53	0	0
Bm314689	10.29	26.26	8.67	0	0	7.19	0	8.63	5.1
Bm284313	12.96	0	16.33	0	0	0	0	15.44	16.79
Bm132822	8.61	46.33	15.72	0	0	0	0	0	0
Bm031183	0	0	2	41	50	49	53	121	126
Bm272951	0	0	0	0	1	0	0	0	1
Bm121453	46.07	128.47	87.72	211.42	211.73	186.64	239.64	237.67	176.21
Bm077777	0	0	0	3	3	5	3	11	4
Bm214737	0	0	0	6	2	0	6	1	2
Bm199825	3.49	7	2.39	1	1	1	0	1	2
Bm004203	1	4	5	1	0	4	0	1	0
Bm206713	8.18	8.55	18.41	26.28	25.28	31.24	44.44	27.32	34.84
Bm252869	0	0	0	1	0	0	1	0	0
Bm015235	0	0	0	1	0	1	3	1	0
Bm102251	0	0	0	1	5	1	5	0	0
Bm275616	0	0	0	2	5	12	1	4	5
Bm035462	6170.68	6956.03	7067.31	18403.98	19062.48	15632.74	13686.62	13784.2	17752.45
Bm185962	0	0	0	2	2	0	1	0	0
Bm314936	91	73	111	73	57	62	56	45	43
Bm057762	0	2	1	1	0	0	0	2	0
Bm002238	195.16	162.82	241.76	980.24	899.34	888.94	879.7	882.33	864.92
Bm298724	0	0	0	1	3	8	0	1	2
Bm242139	0	0	0	1	2	4	0	0	1
Bm051825	824.83	919.88	984.16	448.46	459.17	380.58	588.23	529.13	457.19
Bm056872	0	1	0	0	0	0	0	0	0
Bm098757	1	2	2	2	0	1	1	0	0
Bm088294	0	0	3.9	2.68	0	4.2	0	0	2.27
Bm287574	1	4	1	0	1	0	0	0	0
Bm020378	790.91	942.99	1031.99	725.98	796.91	748.81	646	734.08	652.4
Bm202841	0	0	0	2	6	0	6.86	3	1
Bm276884	1	1	5	1	0	2	4	3	1
Bm051635	0	0.91	0	0	0	0	0	0	0
Bm317572	5	3	11	12	13	5	22	6	1
Bm228451	9	0	10	2	0	0	0	1	2
Bm267205	58.94	41.5	40.09	15.18	0	0	0	0	15.09
Bm111448	188.48	213.99	229.97	231.48	238.98	276.48	245.03	252.65	251.39
Bm180981	18.2	36.58	32.41	10.43	3.86	3.91	10.98	10.42	17.16
Bm264008	0	12.26	11.47	7.24	13.85	7.47	6.21	6.48	1.82
Bm142023	65	87	65	4	1	9	6	6	11
Bm079904	9	22.58	8.22	2	3.47	4.27	0	1	8.71
Bm144399	2362	5791.34	2854.68	657.24	518.47	624.76	991.01	949.43	1199.55
Bm057212	2	0	2	0	1	0	0	0	0
Bm188655	0	0	0	0	3	1	0	2	4
Bm058625	0	0	1	1	0	2	4	0	1
Bm280475	2	1	3	12	10	22	9	8	10
Bm160760	0	0	0	7.02	17.06	25	7.01	5.37	5
Bm125471	0	0	0	1	0	0	0	1	0
Bm095671	5.86	14.04	7.8	10.79	1.63	2.07	10.66	0	6.06
Bm021022	4	0	7	0	2	1	1	4	0
Bm242082	1	0	0	2.61	4.32	2.4	3.97	14.55	24.09
Bm101728	10.15	18.72	11.15	1	4	2	5	1.14	2.24
Bm249908	0	0	0	0	0	3	1	0	0
Bm028158	82.11	116.08	71.15	43.93	21.55	33.68	63.22	44.58	46.79
Bm230993	0	0	0	2	2	1	0	1	0
Bm027022	0.21	0	0	3	0	2.26	0	1.01	0
Bm256150	1	3	7	1	1	1	2	3	4
Bm330277	0	1.47	0	0	0	0	0	0	0
Bm134335	0	0	0	6	0	0	3	0	0
Bm100916	0	7	6	139.8	142.27	157.19	85.6	50.43	53.7
Bm255961	76.21	271.65	99.74	82.98	71.99	55.39	78.68	79.09	86.56
Bm285189	3	1	5.69	1	0	2	0	0	0
Bm206505	7	3	2	12	10	8	8	4	9
Bm121542	7	0	1	0	0	0	0	0	0
Bm256882	2	1	5.49	2.73	3.64	1.56	5.8	2.92	1.42
Bm018069	53.92	119.75	120.92	17.48	28.58	4.61	60.73	119.79	82.86
Bm291251	13	6	0	0	0	1	0	16	14
Bm048039	80	20	93	1	3	3	1	103	127
Bm103973	15	12	10	23	47	28	15	22	13
Bm298490	4	1	6	0	0	0	0	0	0.55
Bm081327	0	0	0	7	0	0	0	0	0
Bm186959	0	0	0	3	6	7	34	17	21
Bm236917	17.6	29.94	46.57	6.32	6.37	4.66	2.63	9.07	0
Bm201494	0	1	0	0	0	0	0	0	0
Bm183683	2	0	0	69	53	27	18	34	26
Bm177088	0	0	0	1	4	2	5	0	3
Bm014603	16.24	31.03	25.52	3.09	1.02	6.28	11.43	8.29	7.05
Bm304710	132.44	34.1	80.9	48.52	21.05	57.43	31.97	11.32	39.51
Bm297396	0	0	0	0	0	2	0	0	0
Bm266677	3	4.18	4	0	2	0	0	0	1
Bm215545	0	3	0	0	0	0	0	0	2
Bm080834	0	0	0	0	8	3	0	0	0
Bm039917	31.93	55.83	38.65	27.34	48.77	52.1	58.39	79.38	93
Bm082999	9	0	4	0	1	0	0	0	0
Bm022071	137	39	139	0	1	0	0	117	150
Bm169133	3.67	5	8.61	0	0	0	1	1.93	6.02
Bm249558	0	0	0	2	0	0	1	3	2
Bm107949	16	19	34	0	3	0	0	0	0
Bm313960	0	0	23.38	0	4.22	0	0	0	0
Bm163245	6.46	2	7.69	6	13	2.72	9	4.98	11.61
Bm071719	75	15.46	87	37.06	0	23.65	24	26	27
Bm177650	5	4.64	5	0	0	2	0	1	0
Bm047695	5	16	6	0	0	0	1	1	1
Bm328425	0	0	1	0	1	0	0	0	1
Bm097292	8.88	18.53	9.15	12.78	6.86	9.74	0	9.59	8.41
Bm025211	32.26	36.38	30.89	2	2	0	1	5	3
Bm205567	0	2.21	1	3	0	0	0	2	0
Bm062692	1.44	2.34	4.53	10.52	4	8.79	7	8	12.16
Bm023107	0	1	1	0	0	0	0	2	0
Bm331983	0	7.13	21.51	3.67	5.54	0	3.26	13.37	5.62
Bm290629	0	1	0	0	0	0	0	0	1
Bm090866	0	0	0	12	50	18	38	0	0
Bm200722	9	5	1	0	0	0	0	0	0
Bm030476	0	2.85	2.77	2.99	2.14	0	1	0	0
Bm274209	0	3	0	2	0	1	0	0	1
Bm252484	5	0	0	0	0	0	0	0	0
Bm159178	0	0	4.48	12.99	2	14.06	18.12	24.74	15.71
Bm315838	0	10.32	274.72	50.97	28.07	7.42	2063.02	397.58	95.31
Bm271760	3	2	3	2	1	3	9	7	3
Bm299310	0	0	0	3	4	0	2	0	1
Bm110982	5	3	3	0	1	1	0	3	7
Bm121769	1	8	8	1	6	5	4	4	1
Bm044377	0	0	0	0	0	3	0	0	0
Bm061363	268	295	287	248	265	235	319	309	279
Bm306467	0	0	2	3.65	0	0	7.89	0	12.13
Bm237691	0	17	0	0	0	0	0	0	0
Bm297505	0	29.58	0	21.35	14.76	14.47	15.63	0	16.96
Bm014754	0	0	0	0	0	0	5.09	0	8.13
Bm053962	2	2.41	4	0	1	1	0	3	0
Bm306446	4	3	11	3	1	2	2	3	1
Bm177504	0	0	0	1.29	2	0	9	4	6.04
Bm041623	272.17	230.84	323.41	347.49	358.3	387.84	378.85	414.95	353.19
Bm239936	3567.9	3045.19	4199.05	4910.64	5201.08	4740.71	4258.53	4863.42	4777.11
Bm001203	0	0	0	0	10.37	4.21	3.21	0	3.36
Bm035766	1	7	1	3	1	1	0	0	1
Bm143847	103.65	77.35	150.71	1345.3	938.58	1153.71	1179.77	1385.29	1238.01
Bm293416	9	0	11	88	125	56	28	46	71
Bm224282	0	0	0	1	3	1	0	3	1
Bm223841	0	1	2	0	0	0	3	0	1
Bm137196	1	0	0	0	2	0	0	0	1
Bm325170	0	2	0	3	0	2	0	1	0
Bm188650	4.62	8.61	9.56	8.08	2.51	3.96	3.84	11.3	0
Bm118199	0	0	0	1	1	0	0	1	0
Bm332187	162.41	303.76	177.73	202.69	308.65	253.81	194.22	302.66	214.2
Bm044972	3.14	27.74	5.35	0	0	0	0	0	2.02
Bm165949	1	0	0	1	0	0	0	0	0
Bm045442	0	0	0	2	2	0	0	1	1
Bm049417	0	0	0	624	126	25	24	28	63
Bm283985	100.93	284.03	274.54	107.61	60.67	0	98.49	133.72	173.9
Bm019472	417	868.11	495.98	209	102.67	171	226	315	239.99
Bm321928	2.45	7.18	4.33	16.41	23.38	23.58	38.83	23.93	17.39
Bm057035	0	0	0	0	2	1	0	0	1
Bm006184	0	0	0	1	10	1	4	0	2
Bm078307	0	0	0	0	2.03	0	1.03	0	0
Bm049253	227.19	555.12	261.98	204.84	207.59	215.55	254.9	336.77	320.67
Bm254440	4.65	0	5.03	4.26	0	0	7.08	4.29	13.48
Bm210216	52.14	16.93	48.95	32.08	106.07	50.99	62.57	98.75	53.73
Bm220221	2	1	2	0	3	0	0	1	1
Bm275583	0	3	0	0	0	0	0	0	0
Bm049207	0	5	0	0	1	0	1	1	0
Bm277506	0	10.27	0	0	2	0	3.12	0	0
Bm151156	0	0	1	4	14	19	0	5	0
Bm249864	4	1	0	3	1	1	2	5	1
Bm155568	5.24	7.97	5.83	1.76	1.71	4.48	4.65	7.27	4.22
Bm055579	265.75	269.62	340.89	100.16	161.98	51.68	143.31	126.64	186.68
Bm223649	16	23	28	6	8	8	18	13	12
Bm226306	0	0	0	11	5	5	0	0	8
Bm186600	0	1	0	2	0	0	4	0	0
Bm076410	0	0	1	0	0	0	0	2	0
Bm325344	0	0	0	13	14	5	9	6	10
Bm282474	0	0	0	3	1	0	2	2	0
Bm041043	0	0	0	3	5	5	0	2	0
Bm047451	4.51	0	7.42	0	5.26	2.54	3.2	7.3	0
Bm325864	0	0	0	0	7	1	3.35	0	1
Bm047332	0	0	0	1.79	6.21	0	0	4.25	0
Bm237473	0	0	0	0	0	0	0	19.71	8.79
Bm172424	34.25	47.03	48.25	46.18	51.64	32.3	41.24	77.06	91.17
Bm058589	845.29	1259.87	1000.25	1481.73	1223.55	942.69	1997.76	1243.02	1998.98
Bm163967	214	253	234	310	347	262	267	194	214
Bm166026	2	2	0	3	0	0	0	0	0
Bm184765	0	0	0	3	0	0	5	0	0
Bm243624	7	7	5	0	2	0	0	0	0
Bm055097	115.88	44.46	139.01	5.9	3.77	9.38	0	0	10.05
Bm044448	41.6	33	25.09	2856	3288	3967	1180	1194	940
Bm247779	199.01	156.61	242.93	335.51	317.32	284.61	351.69	316.86	292.21
Bm193507	83	172	107	64	68	48	92	87	96
Bm098470	0	0	6.76	1.72	0	0	0	0	0
Bm011479	1	2.24	0	3	6.41	0	1.11	0	0
Bm248772	0	0	0	0	2	1	0	1	0
Bm279068	0	13	4	0	1	0	2	1	0
Bm179043	2	4	8	0	1	0	0	0	0
Bm003578	25.62	3.71	22.75	35.04	25.47	40.09	0	0.56	29.53
Bm225837	0	0	0	11	16	14	5	0	0
Bm092509	0	0	0	74.78	54.74	45.46	87.38	28.94	19.57
Bm197678	89.36	60.42	86	61.68	76	93.97	66.3	81.17	42.13
Bm172783	7.07	3.24	13	5.17	11.53	5.02	7	6.01	9
Bm232401	0	0	0	7	2	1	0	0	0
Bm135213	12.99	61.52	42.87	5.91	6.93	13.14	20.64	0	21.66
Bm154923	61	0	55	0	0	1	0	59	85
Bm119487	34.32	67.17	48.87	88.95	64.44	30.84	98.39	82.82	65.78
Bm169236	0	0	0	2	5	1	2	1	0
Bm258445	18	0	14	0	19	20	0	25	12
Bm172745	0	0	0	0	2.24	0	0	0	0
Bm268145	3	6	3	4	2	2	1	1	3
Bm159563	0	2	0	0	0	0	5	0	0
Bm015736	76	20	64	1	2	2	0	86	107
Bm326858	0	0	0	10	12	13	15	2	2
Bm257474	7	4	4	6	7	4	3	2	2
Bm213990	7.09	8.37	5.21	21.27	12.4	30.09	11.43	17	16.69
Bm109308	0	2	1	0	0	0	0	0	0
Bm187354	0	0	0	25.58	20	25.86	16.15	13.14	12.43
Bm316303	6.42	11.79	8.68	21.28	18.84	20.82	19.55	22.17	16.01
Bm292333	116	73	143	239	166	201	215	246	243
Bm161173	0	4.33	19.76	10.77	22	25.39	16.03	22	24.09
Bm005252	0	0	1	3	3	2	2	3	2
Bm101008	5	0	12	0	0	1	0	0	3
Bm074879	0	21.77	1.14	0	0	0	1.53	2.06	1.48
Bm150437	0	0	0	4	11.99	7.34	11	1	1
Bm174539	0	0	0	0	4	1	0	0	0
Bm183577	1	0	0	9	9	9	6	5	1
Bm005956	4	5	8	0	0	1	0	0	0
Bm025419	0	0	0	0	1	2	3	5	2
Bm070450	6.34	10.47	2.59	0	0	0	0	0	0
Bm035369	0	0	0	6	3	7	2	1	1
Bm047057	0	11	0	0	0	0	0	0	0
Bm218112	54	6.01	53.8	2	0	1	2	1	4
Bm233339	2	0	1	0	0	0	0	2	0
Bm075384	0	0	0	0	0	0	0	0	6
Bm199627	0	0	0	0	0	1	0	2	0
Bm277317	0	0	0	0	4	2	5	3	1
Bm158913	30	0	31	9.03	11.94	22	0	16	14.29
Bm124547	1	3	0	0	0	0	0	0	1
Bm001594	2	1.28	0	0	0	0	0	0	0
Bm274995	0	0	1	8	37	10	6	2	5
Bm233587	2.54	8.68	0.93	8.08	2.51	2.48	1.23	5.69	2.24
Bm315997	0	0	0	0	0	0	5	4	0
Bm244527	0	1.68	0	11	8.27	9	8	2	4.76
Bm302439	0	0	0	13.82	6.72	8.59	14.41	13.99	9.03
Bm164415	79.63	21	60.64	197.39	254.99	228.85	182	150.09	186.83
Bm184479	0	0	0	2	0	2	2	0	0
Bm134187	0	1	1	0	0	0	0	0	1
Bm186456	0	5	0	1	0	0	3	0	0
Bm280254	2.89	10.11	9.67	0	0	2.05	0	0	1.19
Bm151694	2	0	0	0	1	1	0	1	0
Bm319257	0	0	0	0	1	0	1	0	0
Bm185008	0	11	0	0	0	0	0	0	0
Bm086481	0	3	0	0	0	0	0	0	1
Bm286990	12.96	14.3	12.52	1.44	1.16	1.55	3.13	2.47	5.66
Bm282434	55	105	56	1	3	1	10	2	3
Bm069640	12	28	27	25	48	19	19	22	19
Bm076851	1	0	0	1	0	0	0	0	2
Bm156878	2	17	1	1	2	0	2	0	0
Bm298604	1	0	0	3	9	5	2	8	3
Bm091843	0	0	0	0	2	0	1	0	2
Bm010606	47	20	76	0	0	0	0	84	91
Bm081919	2.06	6.23	0	1	0	1	1.04	1	1
Bm139635	0	0	0	0	0	0	1	0	0
Bm107107	0	0	0	0	6	4	1	0	0
Bm264029	0	16.01	0	68.65	75.84	58.62	57.06	11.82	57.14
Bm159532	0	5	0	0	0	0	0	0	0
Bm283764	1	0	0	1	2	3	0	0	1
Bm318863	0	0	0	4	5	0	0	2	1
Bm239853	8	5	8	5.25	2.08	2	6	2	2
Bm109655	7	10	20	6	4	3	3	3	3
Bm087508	0	0	0	0	1	1	0	2	2
Bm220407	6	2	7	38.85	36.37	50.46	11	10	9
Bm101317	5	0	1	6	22	6	10	5	7
Bm324518	37.36	37.92	23.39	15.74	23.44	11.46	12.8	17.23	13.39
Bm096493	30.45	20	37.01	2	3.3	0	0	0	0
Bm324891	105.78	164.44	212.3	0.03	97	22.26	71.03	62.98	23.6
Bm116938	0	0	0	0	4	4	2	0	1
Bm193660	0	2.82	0	0	0	0	1.5	1	0
Bm319315	369.85	965.23	452.37	178.08	122.97	132.26	218.92	182.47	178.36
Bm253279	0	0	0	0	0	0	1	0	2
Bm001459	14	0	11	0	0	0	0	0	0
Bm256729	32.88	14	20.81	0	0	0	0	37.03	34.32
Bm153793	0	9.73	16.57	4.99	19.49	22.28	21.9	21.62	21.45
Bm176341	0	0	0	3	1	0	1	0	0
Bm225832	0	3	0	2	0	0	4	0	0
Bm333998	18.85	48.16	24.02	32.77	13.62	28.76	20.29	31.04	39.31
Bm033648	0	0	0	0	0.13	0	0	0.87	0
Bm243340	0	5.58	4.56	0	1.04	0	0	0	0
Bm313996	0	0	0	0	0	0	1	0	0
Bm091500	0	0	0	8	0	0	8	0	0
Bm119618	43.6	22.18	47.61	0	0	14.02	11.74	18.04	14.19
Bm255619	0	0	0	28	19.89	15.6	10.91	10.77	5.92
Bm230814	0	1	0	0	2	0	0	0	0
Bm166499	64	87	63	19	8	4	17	6	19
Bm154110	0	0	0	1	7	0	0	1	0
Bm042866	0	0	2	1	3	4	6	2	0
Bm190984	661.3	4397.45	770.32	212.1	254.12	140.73	375.3	327.33	291.02
Bm130896	6.85	4.79	2.2	29.48	24.04	22.77	22.31	16.16	31.34
Bm052619	3	3	7	26	17	11	10	11	1
Bm252815	18.76	0	0	0	4.47	8.61	0	0	13.15
Bm137763	0	1	4	9	6	9	8	33	15
Bm268840	0	0	0	1	0	3	2	0	1
Bm178864	0	0	0	4.29	3	8	3.67	4	3
Bm048523	0	0	7	0	2	0	0	2	1
Bm210883	5	7	6	5	9	8	2	11	1
Bm074790	0	0	0	0	7	4	0	1	0
Bm325766	2.2	0	1.17	0	0	0	6.83	0	0.81
Bm284782	0	0	0	2	1	2	7	1	2
Bm126987	2.68	0	0	0	0	0	0	0	0
Bm011528	705.41	872.41	877.42	498.96	600.25	567.84	591.92	444.8	542.58
Bm195652	0	8.69	0	34.07	32.25	18.45	54.89	27.29	39.47
Bm200007	0	1	0	1	1	0	0	0	0
Bm087269	1	2	0	2	0	4	6	2	3
Bm259731	50.64	69.18	72.36	54.17	74.1	67.66	69.36	18.6	23.17
Bm068913	0	2.09	0	0	0	0	0	2.97	0
Bm131244	0	0	0	4	1	1	2	1	1
Bm190857	0	0	0	0	0	0	0	0	4
Bm065079	12	0	5	15	24	11	20	20	18
Bm222444	0	0	1	0	0	0	0	0	0
Bm106819	0	0	0	0	4.78	4.38	1.79	0.33	0
Bm150433	0	0	0	0	3	2	6	12	13
Bm152925	1.54	3.67	4.31	156.56	138.86	140.18	79.42	48.08	58.41
Bm221855	124.72	107.45	151.33	85.27	68.44	75.81	98.81	51.73	111.53
Bm054403	1	1	0	0	0	0	0	0	0
Bm137578	0	9.35	9.05	5.03	0	5.6	2.52	0	6.17
Bm192837	0	0	0	1	0	0	0	1	0
Bm083494	6	4	10	10	7	3	7	5	8
Bm280657	13.18	7.16	31.46	7.11	17	15	16.99	20.31	18
Bm274414	0	1	0	0	0	0	0	0	0
Bm249884	15	40	27	7	1	2	4	10	4
Bm320574	2	2	2	0	0	0	3	1	1
Bm024614	3.91	8.3	5.26	0	3.16	2.35	0	0	0
Bm120066	0	0	0	2	3	0	2	1	1
Bm100541	0	8	0	4	1	0	1	2	2
Bm300965	15	31	23	36	46	43	44	35	36
Bm042994	338.95	811.28	384.01	404.22	367.68	384.59	476.61	379.15	376.76
Bm176319	0	4	0	16	0	0	27	0	0
Bm270824	4	1	6	0	0	0	0	8	8
Bm332844	1	1	0	0	0	1	0	1	0
Bm308090	165.04	126.45	206.26	158.17	144.6	154.18	124.2	213.63	198.63
Bm175447	2.01	5.36	1.63	0	21.71	4.26	2.44	2.31	3.51
Bm169674	3.18	8.34	14.92	2.39	1.25	7.79	4.41	1.95	12.11
Bm105023	19	1	22	1	3	2	5	2	4
Bm041628	19.12	17.61	28.28	4.92	11.51	2.42	16.56	14.91	14.92
Bm085997	12	8	5	8	6	4	5	7	4
Bm278039	0	3	0	0	0	0	0	0	0
Bm008995	0	0	0	0	2	4	0	1	0
Bm284325	8.8	21.3	38.11	16.01	19.37	7.56	7.52	13.97	15.52
Bm217645	2	1.07	1.15	2.18	0	0	4.53	2.5	1.11
Bm246964	1	2	0	0	0	0	0	0	0
Bm054336	0	0	0	0	3	0	0	3	6
Bm099858	0	1	0	1	0	1	2	1	2
Bm020472	60.56	113.9	68.92	61.22	77.06	50.83	128.46	84.56	104.91
Bm310107	2	0	0	7.2	25	7.01	13	22	19
Bm081296	0	0	0	5	4	2	5	6	5
Bm270612	0	0	0	2	7	2	0	0	0
Bm086632	0	0	0	9	7	10	10	1	2
Bm091979	0	0	0	0	2.01	0	2.41	0	0
Bm274085	1832.42	1092.89	2049.07	139.73	154.34	77.62	231.16	177.22	208.61
Bm014307	0	0	0	0	0	0	12.04	2.02	0
Bm151665	0	0	0	10	6	9	14	7	12
Bm028162	641	961	748	582	661	530	712	709	592
Bm206787	13.13	3.97	18.37	2.63	3.35	5.82	0	7.93	9.26
Bm136648	8	3	1	8.46	11	7	11	9.49	2
Bm046403	10.78	11.02	1.81	5.45	2.05	2.04	2.6	2.03	4.32
Bm218184	0	0	0	20	17	10.02	19	11	6
Bm034094	1	3	5	0	0	0	0	0	0
Bm001384	69.31	50.9	87.05	56	84	54	0	0	70
Bm004375	0	7.84	26.37	11.8	5.7	4.25	2.14	12.82	20.17
Bm196545	0	0	0	1	0	1	0	0	0
Bm170660	0	0	0	28	0	0	28	0	0
Bm200056	1	1	2	0	0	0	0	1	0
Bm161326	4	2	0	5	4	8	4	0	5
Bm173998	3	3	1	0	0	0	1	0	1
Bm053266	12	1	22	2	2	0	1	0	1
Bm333872	0	0	0	0	0	0	2	0	0
Bm167979	0	1	0	1	0	3	0	1	2
Bm188800	8.54	15.96	9.9	0	0	0	1.36	1.56	0
Bm327884	0	0	2.89	1	0	0	0	1	1
Bm059695	7	13	14	5	3	4	3	8	6
Bm033245	357	965	435	30744	22271	22496	20477	18144	14684
Bm182787	0	0	0	6.1	11.74	12.18	10.66	4.66	13.91
Bm195462	0	4	0	25	0	0	24	0	0
Bm216304	0	0	0	0	0	0	1	0	0
Bm261258	0	0	0	0	0	0	2	0	0
Bm133726	0	0	4	0	0	0	0	1	0
Bm209380	0	0	0	0.58	0	0	0.78	4	0
Bm113396	0	0	0	0	0	14	0	0	0
Bm164294	0	0	0	0	2	1	0	2	1
Bm319756	0	0	0	5	5	0	5	4	1
Bm068401	1	0	3	0	2	0	0	8	1
Bm189617	23	4	25	22	38	30	11	21	17
Bm225932	0	0	0	9	2	7	3	4	2
Bm267450	4.75	3.05	3	0	0	0	0	3.07	18.32
Bm317914	25.59	11	47	0	2	0	0	43.66	47
Bm093840	0	0	0	4	7	0	5	5	2
Bm129611	0	0	0	5	15	11	13	7	11
Bm171146	0	0	0	0	0	0	0	7.92	0
Bm259694	45.77	0	19.42	0	0	0	0	0	35.83
Bm107455	36.31	0	26.98	0	29.8	22.2	0	26.38	18.55
Bm067825	21.8	12.04	18.19	3	4	2	5	3	3
Bm043630	133.62	136.42	149	336.59	274.75	303.8	332.46	359.68	288.3
Bm239941	54.01	54.05	68.17	72.9	55.01	72.87	18.13	48.74	38.71
Bm313754	0	0	0	1	2	1	1	2	1
Bm157296	37	65	44	351	132	120	87	71	69
Bm318630	0	0	0	1	8	3	0	0	0
Bm195003	0	0	0	3	0	0	5	0	0
Bm239132	6.8	42.31	34.5	1.36	5.78	10.72	4.13	5.68	10.44
Bm311162	194	56	219	6	10	4	0	150	222
Bm007059	0	2	0	0	0	0	0	0	3
Bm308339	4.35	0	5.99	0	3.91	1	0	0	0
Bm011458	1	1	4	47	74	71	23	31	14
Bm076838	108.3	52.22	115	10.23	9.08	8	8	8.08	20
Bm335814	6	15	9	1	1	0	2	0	0
Bm206848	0	0	0	2.59	0	5	14	0	0
Bm033537	0	2.57	17.21	6.22	8.89	0	0	13.94	4.42
Bm209619	0	0	0	40	27	16	21	4	7
Bm030407	12	8	23	27	26	29	19	23	10
Bm242532	0	0	0	0	5	4	0	4	2
Bm209207	0	0	0	2	1	0	0	1	0
Bm040863	3.88	7.49	6.02	0	0	3.88	0	0	0
Bm233190	31.94	48.37	27.73	0	0	0	0	0	0
Bm146531	0	1	0	6	3	7	3	2	0
Bm032435	0	0	0	2.2	0	6.19	0	0	0
Bm140235	99.74	30.13	149.47	2	8	3	0	176.8	188.48
Bm296950	0	1	0	0	1	2	1	0	1
Bm035945	123.92	150.15	150.14	74.96	100.7	65.27	126.39	88.98	86.85
Bm258654	0	20	0	0	0	0	0	0	0
Bm117428	17.06	26.85	0	6.85	6.05	17	0	4.37	7.15
Bm333605	0	2	2	0	1.62	0	1.09	0	1.46
Bm116075	0	0	0	9	5	4	0	1	1
Bm313047	0	0	0	6	0	0	0	0	0
Bm091009	0	0	0	0	5	1	1	1	1
Bm294574	5.23	0	17.64	0	16.47	4.4	9.68	17.09	17.25
Bm299490	1528.48	804.1	1650.31	3790.82	4478.43	3133.27	3407.13	1639.71	4313.61
Bm093590	10	5	9	77	145	151	48	47	80
Bm267578	0	0	0	3	0	2	1	3	1
Bm105916	0	0	0	1	0	0	0	0	0
Bm191316	0	14	0	10	0	0	22	0	0
Bm238281	2	0	0	1	4	5	0	1	6
Bm042389	6	6	11	1	0	2	0	1	1
Bm262990	0	0	0	8.35	3.06	3.34	0.26	11	6.45
Bm065150	3.22	3.15	5.78	24.65	13.19	11.18	8.2	19.07	4.42
Bm015738	0	0	0	0	2	1	1	2	0
Bm173359	0	0	0	17	2	19	26	14	8
Bm228455	12.44	84.54	33.28	10.42	0	17.01	0	0	0
Bm074986	5	2	20	0	0	0	0	0	0
Bm283678	0	0	0	1	0	0	0	0	0
Bm119036	13	6	24	19	15	9	17	21	20
Bm284539	0.26	20.68	0	5.38	1	0	2.48	2.44	1.4
Bm154489	0	0	0	0	4	14	0	0	0
Bm054519	0	0	0	2	1	1	2	0	0
Bm164021	0	0	0	6.62	0	0	0	0	0
Bm176605	8	9	5	13	3	6	3	4	6
Bm121999	0	0	0	1	0	0	0	4	2
Bm322072	0	0	2	1	0	3	4	3	0
Bm254618	0	3	0	1	0	0	6	0	0
Bm236898	0	0	0	0	0	1	5	3	1
Bm001786	8.12	8.52	4.39	2.29	2.59	3	6.34	6	5
Bm034673	25.12	29.61	32.69	17.63	11.63	5.81	22.76	8.93	13.24
Bm104145	0	0	0	0	0	0	0	1	1
Bm295275	14	38.99	20.98	5	3	8	14	20	10
Bm255680	2	0	0	0	0	0	0	0	0
Bm018409	3	8	3	1	0	2	2	11	1
Bm177340	0	3	4	3	0	0	1	0	3
Bm214799	1	3	4	0	0	0	0	0	0
Bm014734	11	0	12	0	2	1	2	2	1
Bm212351	2	0	2	0	1	0	0	2	0
Bm072085	190.28	375.33	195.45	430.13	412.65	464.74	279.84	350.22	314.74
Bm183244	86.67	0	72.18	0	9.13	10.11	0	16	10
Bm163927	0	0	0	27.47	32.39	25.95	49.78	19.13	30.99
Bm144256	0	0	0	2	3	4	0	2	1
Bm014417	2	5	0	0	0	0	0	0	0
Bm301988	9	13	19	6	2	2	4	10	2
Bm064146	45.76	30.68	70.38	5.46	20.86	3.5	11.9	3.66	24.19
Bm012265	0	0	0	15	3	1	0	4	4
Bm236958	0	0	0	1	2	3	3	0	0
Bm299194	0	0	0	2	7	3	0	2	0
Bm171329	144.44	132.29	138.12	112.01	98.47	79.38	115.52	100.84	63.61
Bm100076	6.13	18.52	5.88	5.91	11.64	6.66	5.6	26.99	5.01
Bm129035	0	0	0	8	2	1	1	6	2
Bm023850	5.83	8	2	1	0	1	0	0	1.66
Bm078737	10	7	15	2	5	3	4	1	7
Bm170665	0	0	0	0	0	0	4	1	3
Bm070570	3.5	0	1	0	0	4.23	0	6.16	0
Bm315870	103.82	0	126.98	177.73	152.81	174.11	134.73	159.48	80.04
Bm013465	0	12	0	0	0	0	0	0	0
Bm287968	0	6	0	0	0	7	0	0	3
Bm224285	0	0	11.79	0	0	0	0	2.75	2.97
Bm113280	125.72	168.99	145.41	98.3	77.97	84.73	82.96	99.55	80.63
Bm209870	0	0	0	3	3	0	1	3	3
Bm139640	9.61	2.69	13.49	0	0	12	0	0	0
Bm103361	0	9.55	8.36	9.14	0	0	7.74	4.69	3.4
Bm234632	0	0	0	14	0	0	2	0	0
Bm213817	0	2	0	4	0	1	1	0	0
Bm164121	0	0	0	5	0	0	3	1	0
Bm237004	0	0	0	4	21	6	7	4	4
Bm107808	0	0	0	54.04	15.7	6.57	0	43.72	0
Bm044241	2	0	0	9	25	6	4	5	4
Bm071720	0	0	0	2	0	0	0	2	0
Bm329042	0	0	1	0	0	0	0	0	0
Bm072867	0	2	0	0	0	0	0	0	1.01
Bm097499	13.81	4.52	8.09	0	0	7.41	0	0	1.92
Bm264898	22.86	13.23	10.09	20.99	43.81	57.49	26.3	37.1	45.26
Bm234722	3	0	4	0	0	0	0	0	0
Bm184079	0	0	0	0	15	0	0	0	0
Bm276309	34.33	0	24.15	8.22	0	0	0	0	12.37
Bm245820	44	9	43	55	47	27	36	29	27
Bm318492	0	0	0	0	13	16	0	13	11
Bm199933	287.78	296.94	339.98	29.98	35.33	45.43	48.1	99.76	117.46
Bm089072	0	0	0	0	2	0	8	1	3
Bm251030	0	1	1	0	0	0	0	0	0
Bm127320	0	0	0	0	6	3	0	1	0
Bm285294	22.42	15.04	34.56	8.73	15.21	0	10.68	0	8.91
Bm326267	0	0	0	0	0	4	2	7	7
Bm100920	12.96	0	0	0	0	0	0	0	4.81
Bm108479	0	0	0	4	3	7	6	6	2
Bm088626	0	31	0	0	0	0	0	0	0
Bm198538	4	0	1	0	2	0	0	0	0
Bm281213	0	0	0	4	13	0	3	5	7
Bm223895	15.39	0	13.08	5.48	8.23	4.9	5.91	12.28	10.31
Bm113701	6.53	12.94	12.68	5.56	9.79	7.18	6.53	13.3	5.76
Bm324298	2	7	3	2	3	1	3	2	4
Bm229434	1	4	3	6	6	8	4	1	1
Bm156576	24.3	42.75	44.41	35.8	37.71	17.16	77.39	29.77	76.38
Bm091349	63	23	63	0	0	1	0	82	78
Bm021333	9.94	4.38	0	0	0	0	0	1.1	1.18
Bm301076	4452.18	8264.68	5406.05	263.73	307.69	342.71	239.71	347.56	333.56
Bm300334	0	0	0	0	0	1	3	3	0
Bm045078	0	0	0	2	0	0	0	0	0
Bm139675	27	65	31	0	2	1	3	8	2
Bm334593	0	0	0	2	5	7	0	3	4
Bm202346	0	0	0	1	2	2	2	3	4
Bm302197	7	22	8	4	7	4	6	8	6
Bm239265	14	0	9	0	2	2	0	0	0
Bm059115	11.36	13.62	21.53	1	0	0	0	13.82	30.28
Bm072810	3	0	4.75	23	33	8	3	5	6
Bm036896	0	0	0	0	0	0	0	5.04	0
Bm086190	3	3.75	1	2	1	0	1	1	0
Bm202474	0	15.18	31.58	13.88	8.27	9.85	13.98	7.93	15.61
Bm172341	0	0	0	3	0	0	0	0	1
Bm024507	6	29	9	22	10	6.3	9	12	9
Bm084477	3.04	0	0	0	0	0	1.58	0	0
Bm228976	5	0.43	0	0	0	0	0	0	0
Bm261750	1.95	9.65	0	3.77	0	5.96	6.84	2.45	8.19
Bm270838	2	2	1	2	6	4	0	2	1
Bm237130	99.73	114.65	113.73	249.31	183.95	132.68	188.62	165.7	127.43
Bm253964	6.9	19	12	37.01	9.01	18.57	24.33	24.18	29.6
Bm172888	3	1	2	0	0	0	0	0	0
Bm260074	2	1	6	0	1	1	0	0	0
Bm101740	0	5.07	0	1.38	4.21	0	2.73	3.53	6.08
Bm118702	0	1	0	0	0	0	0	0	0
Bm210312	0	0	0	0	1	0	2	0	0
Bm291541	2	7	0	0	0	0	1	0	0
Bm307703	10	6	13	0	0	0	0	16	14
Bm238655	0	0	0	0	2	0	4	0	0
Bm100889	0	0	0	10	9	5	7	6	11
Bm159380	0	4.71	7.87	0	0	0	0	0	0
Bm267078	3	0	5	0	1	0	0	0	0
Bm170575	0	1	0	0	0	0	2.55	1	0
Bm328754	0	3	0	3	0	0	2	0	0
Bm060322	0	0	0	45.85	42	31.28	42.7	24	17
Bm262229	0	5	0	0	0	0	0	0	0
Bm021907	0	0	0	0	4	1	0	2	1
Bm244033	1	0	0	2	0	4	8.14	10	11.09
Bm105787	0	0	0	4	1	0	3	6	1
Bm187780	0	0	0	0	6	15	0	0	0
Bm150966	6.14	8.65	5.37	3.84	8.05	0	1.14	4	3
Bm066499	11	17	8	8	7	5	6	1	2
Bm325710	17	6	4	1	2	3	1	5	2
Bm205425	7	6	6.55	1	3	2	3	1	1
Bm068513	2.82	6.51	0	3.56	0	0	2.11	10.63	5.44
Bm053199	0	0	0	0	4	1	7	3	3
Bm184633	0	0	0	3	4	3	7	2	1
Bm133616	0	0	0	10.2	6.1	3.34	1.51	0	0
Bm155599	0	0	0	8	7.98	3.6	10.49	1	5
Bm036281	11.39	9	34	0	1	0	0	16.65	20.66
Bm000542	12	4	10.52	111	119	78.07	36.67	39.98	46
Bm331182	4.53	7.02	6.66	1	3	0	0	3.25	2.06
Bm176044	0	1	5	2	3	2	0	2	2
Bm200241	0	0	0	0	3	0	2	2	0
Bm328282	10.27	8.32	24.73	5.17	22.94	18.7	11.73	5.11	7.7
Bm030065	10	5	13	1	0	1	0	0	3
Bm331379	14	3	31	13	9	5	1	3	23
Bm130570	393.97	386.92	430.58	520.61	490.68	521.66	492.61	498.31	528.19
Bm012716	3	1	2	0	0	0	0	0	0
Bm016355	0	0	0	1	3	0	3	3	5
Bm304186	0	0	0	0	0	1	0	1	3
Bm294336	3	0	0	10	8	14	3	9	4
Bm130307	121.89	83.04	191.33	384.49	392.74	392.28	314.69	518.99	433.57
Bm171128	0	0	0	8.2	0	7.88	9	4	3.98
Bm038742	4	0	0	0	0	0	0	0	0
Bm170979	0	1	0	1	0	0	2	0	0
Bm121218	0	0	2	0	0	0	0	0	0
Bm066008	2	1	2	1	0	0	1	0	0
Bm156951	6	10.44	3.1	5.73	7.49	8.37	0.62	0	4.26
Bm139054	2	3	2	0	0	0	0	1	1
Bm236241	0	0	0	0	2	4	0	0	0
Bm072583	0	2.57	10.25	0	3.83	0	3.09	0	0
Bm257837	8	2	13	1	0	0	0	3	1
Bm332022	0	0	0	0	2.84	0	0	0	0
Bm157373	111.35	7.13	172.2	0	0	0	0	195.8	192.26
Bm323559	0	2	0	0	0	2	1	1	0
Bm277114	2	18	6	7	1	0	7	4	0
Bm170909	0	0	2	3	0	0	2	0	1
Bm280920	10	1	12	0	3	0	0	14	20
Bm228948	0	0	0	2	0	0	3	0	0
Bm096307	2.78	0	0	0	0	0	0.43	1	0
Bm262311	2.71	0	5.74	0	0	3.95	5.71	10.45	0
Bm047888	2.56	0	0	0	2.4	2.37	0	5	0
Bm315920	2	1	1	2	4	0	0	1	2
Bm117701	83.8	90.66	90.69	33.04	36.39	41.39	23.63	39.46	69.49
Bm251678	0	0	0	0.54	0	0.54	0	0	0
Bm217469	0	0	0	12	5	3	5	0	0
Bm055411	0	0	2	0	3	2	0	1	1
Bm090991	111	23	139	2	5	1	2	118	105
Bm017582	3.03	10.27	10.51	24.7	17.42	34.47	12.39	23	13.56
Bm069456	6.21	9.43	11	0	0	0	0	0	2
Bm056800	5.46	65	23.23	5	4	7.08	2	7.46	7
Bm311852	2	0	4	2	2	1	0	3	4
Bm013363	13.56	16.45	23.08	26.27	18.99	31.67	8.41	24.02	29.67
Bm246356	0	0	0	6	0	0	5	0	0
Bm260005	0	1	0	0	0	0	0	0	0
Bm116966	6.4	9.94	3.1	0	0	0	0	0	1.65
Bm029051	0	2.02	0	2.1	6.88	2.14	4.06	8.25	5.09
Bm116737	0	0	1	3	2	1	0	0	0
Bm192145	0	5.58	21.2	7.03	24.3	6.19	25.42	36.82	47.03
Bm207030	10.07	30.2	26.3	0	3.31	0	2.84	3.72	0
Bm157252	0	0	0	1	1	1	2.33	0	1
Bm045636	0	0	0	11	14	4	12	12	10
Bm038472	0	0	8.24	2	0	0	0	0	11.67
Bm310942	0	0	0	0	0	0	1	0	0
Bm062264	0	0	0	1	3	2	1	0	1
Bm026835	1	0	0	1	0	3	2	0	1
Bm064399	0	0	0	49	0	0	74	0	0
Bm072301	0	0	0	1	0	0	0	0	0
Bm055779	0	0	0	0.06	0	0	3.36	1.77	0
Bm026321	0	0	0	4	1	2	0	0	1
Bm203529	4	4	5	4	0	0	1	0	2
Bm182906	2	1	1	7	25	12	4	13	10
Bm061160	0	0	0	30.4	35.2	18.85	18.29	12.81	12.79
Bm102335	0	0	0	3	4	2	0	0	0
Bm194094	105.55	97.39	127.46	162.38	152.6	138.91	129.86	143.81	127.6
Bm027042	0	1	1	0	0	2	0	0	0
Bm102426	5	3	2	0	2.69	1	2.67	0	1
Bm045509	2453.01	2805.68	2790.91	3189.54	3510.36	3295.91	2797.46	2610.87	2591.94
Bm046028	2	0	0	0	2	4	3	0	3
Bm282365	9	0	3	0	0	0	0	0	0
Bm179483	5	1	9	2	0	0	0	2	0
Bm257106	42.49	0	33.15	0	0	0	0	0	0
Bm087563	0	0	0	3	16	11	5	1	9
Bm031899	0	0	0	2	2	2	6	1	0
Bm230656	1	1	1	2	0	3	1	0	0
Bm224985	33	37	34	55	47	54	33	56	39
Bm239607	0	0	0	2.06	7.2	7.85	3.01	3.52	2.45
Bm038147	0	0	0	1	0	0	12	0	0
Bm300911	3	1	6	1	1	1	3	1	0
Bm035964	0	0	0	16.99	0	0	1	0	0
Bm080666	1	0	2	0	0	0	0	1	1
Bm123061	22.43	46.15	34.4	59.6	25.27	49.54	39.25	46.15	41.98
Bm220957	1.65	15.49	3.54	0	0	0	2.08	1.04	0.46
Bm232773	51.43	48.87	50.82	33.25	44.8	42.55	28.61	41.7	21.68
Bm042166	4	0	1.55	9.77	3.51	0	0	0	0
Bm059708	0	0	0	2	0	1	6	6	8
Bm297031	0	1	0	0	1	1.08	3	1	0
Bm063529	0	2	3	0	0	0	1	0	1
Bm067025	51	47	59	26	24	18	23	14	15
Bm148285	0	1	0	1	1	0	0	0	0
Bm044653	0	0	0	2	0	0	1	0	0
Bm028237	0	0	1	2	0	1	0	2	1
Bm102850	0	0	0	1	2	0	0	0	0
Bm123608	82.6	221.16	78.78	71.88	46.84	44.43	52.45	36.63	68.9
Bm167149	0	0	0	13.67	26.58	25.08	51.41	15	17.15
Bm054244	2	0	1	0	1	1	0	1	0
Bm277734	0	0	1.72	4.16	0	0	0	3.74	7.16
Bm228350	9.77	2.83	2.98	0	0	9.14	0	1.64	3.18
Bm255492	0	0	1	3	1	0	4	0	1
Bm146139	1	5	2	0	1	0	1	1	0
Bm125552	2	4	3	0	1	0	0	0	0
Bm199375	50.19	137.02	83.3	18.06	36.83	37.3	26.79	49.25	40.18
Bm334791	993.95	957.13	1299.32	1238.86	1448.84	1305.6	1155.76	1472.79	1239.82
Bm282618	2	0	6	0	0	0	2	1	0
Bm103632	19.84	50.36	65.27	32.49	41.72	24.75	30.95	30.53	21.8
Bm066646	50.59	26.18	87.86	0	0	9.64	0	0	0
Bm285392	1.19	0	2.65	2.61	0	7.2	4.09	5.71	4.68
Bm124594	151	286	253	77	93	71	98	130	109
Bm192225	11.09	6.87	12.13	7	6	3	10.38	17	8
Bm001134	1	0	0	10.84	0	0	0	5.53	3.32
Bm168929	0	0	0	6.23	0	7.06	4.95	0	0
Bm036141	37.37	5.38	67.82	0	0	2	0	39.14	74.17
Bm321173	0	0	0	1	0	0	6	0	0
Bm182954	0	0	1	0	0	3	0	0	0
Bm178459	83.03	71.82	55.64	103.49	76.98	48.86	81.11	37.26	58.2
Bm258630	0	0	0	3	3	0	1	0	0
Bm198171	12.78	14.33	0.31	20.53	5.48	5.42	24.84	18.3	13.28
Bm231528	6	8.97	3	1	1	0	3	1	3
Bm317996	0	0	0	0	0	0	8.25	4.85	7.77
Bm268606	9	11	5	4	3	3	3	5	5
Bm285525	0	8	0	3	0	0	13	0	0
Bm303988	0	0	0	0	0	8	0	0	0
Bm300226	1632	400	1634	1320	2837	1506	1314	652	1049
Bm325298	0	0	0	0	7	2	0	0	1
Bm278744	0	5.3	0.93	7.9	0	3.11	0.7	0.98	0
Bm089380	0	1	1	0	0	0	0	0	0
Bm077694	0	0	0	3	11	1	0	0	0
Bm048906	5	9	5	3	2	2	3	1	2
Bm188589	169	171	200	169	151	155	121	146	139
Bm243242	0	0	0	3	13	5	0	0	0
Bm288682	1	0	0	2	1	0	0	1	0
Bm169142	5	1.61	3.49	0	0	0	0	0	0
Bm098737	8.29	14.26	15.27	18	9.79	11	14.76	2.11	14.85
Bm321256	27.77	24.38	33.74	59	102.05	84.41	76.84	47.13	48.12
Bm166747	2	2	0	0	0	0	0	0	2
Bm197706	0	0	0	17	8	3	2	8.61	10
Bm125616	0	0	0	2	0	0	1	4	5
Bm318421	359.72	86.88	394.23	678.75	763.65	657.73	388.29	511.96	599.82
Bm223396	0	0	0	6	3	0	0	2	3
Bm013306	0	6.77	8.96	14.71	7.65	28.19	6.04	12.31	10.48
Bm012583	0	0	0	0	0	0	0	0	2.72
Bm096298	3.3	7.71	4.3	5.7	6.22	3.5	3.19	2.07	5.18
Bm281618	26.88	5.53	11.89	46.75	65.48	38.57	59.78	33.5	40.3
Bm221091	0	0	0	4	2	0	0	0	0
Bm138100	1341.58	3977	1418.46	2480.17	1670.08	1464.86	2971.93	3101.31	2847.26
Bm074895	0	0	0	3.65	16.87	5	36.63	13.81	12.58
Bm059079	1	0	0	0	0	0	0	0	0
Bm129655	0	0	0	1	9	2	2	0	0
Bm049686	0	0	0	0	3	0	3	3	4
Bm239545	0	0	0	4	0	0	0	0	0
Bm237499	9	0	7	5	4	7	7	2	7
Bm092209	12	16	11	3	2	4	6	6	4
Bm319863	6	13	3	6.01	10	3.21	5	6	5
Bm170207	1	0	4	0	0	0	0	2	6
Bm321181	0	0	0	3	1	1	1	2	1
Bm278094	0	0	0	2	0	0	1	0	0
Bm218462	0	0	0	0	0	0	0	0	1
Bm096753	32.68	71.91	49.49	20.59	49.94	21.88	44.74	9.67	35.22
Bm037793	38.64	93.09	40.2	11	0	0	14	5.03	7
Bm083115	4	1	2	1	4	2	1	1	2
Bm269853	2	2	6	2	3	2	6	7	4
Bm335966	0	0	2	0	0	0	0	0	0
Bm005757	181.83	186.29	222.48	119.82	121.38	129.99	170.14	114.17	132.34
Bm100748	2	1	0	0	0	3	1	0	0
Bm293459	0	0	0	1	0	1	0	6	5
Bm323361	25.08	200.07	61.75	39.61	65.41	26.96	71.51	48.44	36.51
Bm195416	210	102	268	2755	3086	3810	1916	1586	2332
Bm282486	20	6	28	1	0	0	1	28	24
Bm320786	21	12	24	4	4	4	9	5	3
Bm177769	0	2	0	0	0	0	0	0	0
Bm095162	51	4	48	0	7	1	0	20	14
Bm027919	3	3	0	0	2	0	0	0	0
Bm039060	0	0	0	3	1	0	4	2	2
Bm166572	16.8	11.89	21.57	16.36	12	11.01	21.96	35.92	22.84
Bm074409	1	0	0	7	5	2	8	2	6
Bm017887	3	2	6	1	0	1	0	2	0
Bm025622	14	38	19	27	20	13	18	14	18
Bm286165	1171.59	3306.71	1662.95	131.76	90.7	121.37	153.28	98.75	79.4
Bm057294	0	0	0	0	6	3	4	1	0
Bm315777	12.4	0	27.48	0	0	0	0	0	0
Bm288767	2404.6	2771	2922.79	570.14	738.98	601.25	785.98	583.69	675.89
Bm333608	1	0	0	41	30	17	48	48	24
Bm033145	0	0	4.04	0	7.58	0	0	0	0
Bm167280	244.22	261.58	348.34	3321.81	3405.65	3282.12	2462.44	2319.75	2619.86
Bm158339	152.24	113.52	181.9	82.98	106.73	88.55	97.38	131.05	110.29
Bm284044	0	0	0	1.25	0	2.4	0	2.39	0
Bm280784	3	0	1	8	8	1	5	2	2
Bm009572	2	1	0	0	0	0	0	0	0
Bm147937	1	2	0	7.78	0	4	0	4.35	3.88
Bm013409	7	9.76	8	31.29	2	2	43.66	3	2
Bm071708	0	0	0	2	0	2	1	2	1
Bm268280	0	0	1	1	2	1	2	0	0
Bm155300	13.84	37.65	19.2	7.82	16.27	6	18.07	10.86	4.18
Bm263065	17.96	0	15.65	0	0	0	0	0	0
Bm150647	0	0	0	0	0	1	6	0	3
Bm044649	3	6	6	6	6	1	6	7	1
Bm244889	0	7	4	5	12	1	8	7	3
Bm045860	16	9	18	0	0	0	0	0	0
Bm315382	15	2	15	0	0	1	0	25	16
Bm303213	2	0	1	0	0	2	3	2	0
Bm217614	0	0	0	0	0	0	2	0	0
Bm173959	3	12	8	4	11	2	13	8	5
Bm031737	2	1	3	34	17	16	9	8	9
Bm206142	1	0	0	3	8	8	0	1	0
Bm208662	35.17	8.18	28.61	0	0	0	0	21.97	5.35
Bm129249	0	0	0	1	0	0	0	0	0
Bm176312	4	0	1	3	2	7.31	1	3	2
Bm278973	2	2	4	0	0	0	0	0	0
Bm046859	3	2	0	2	3	0	0	0	0
Bm054681	0	0	0	1	0	3	0	7	2
Bm169331	14.88	9.52	0	0	0	0	0	0	0
Bm098647	7	1	5	0	0	0	0	0	0
Bm203546	0	0	3.89	0	0	0	0	0	0
Bm322610	0	0	0	0	1	0	0	0	0
Bm164444	35.57	62.77	22.75	4.09	4.32	0	2.82	5.17	12.26
Bm040584	85.24	68.86	91.08	325.85	371.96	316.37	277.17	236.1	247.95
Bm198850	0	0	0	6	4	2	15	6	2
Bm175669	4	0	3	0	1	0	0	2	0
Bm194837	0	0	2	3	5	1	3	2	3
Bm073386	0	5	0	6	0	0	9	0	0
Bm242642	0	0	0	3.38	0	0	2.88	0	0
Bm182569	4	0	6	110.86	168.54	127.45	74.96	94	89
Bm059205	1	0	0	0	7	1	1	2	0
Bm308000	34.44	63.93	62.17	87.97	49.61	38.96	52.78	44.88	25.36
Bm106980	0.04	0	0	0.05	0.01	0	0.01	0.01	0.01
Bm335252	18	12	9	73	60	80	103	66	60
Bm242119	0	0	0	5	12	11	0	6	3
Bm336758	155.57	212.89	169.7	130.9	85.01	84.19	102	116.42	90.87
Bm020605	104	25	106	1	3	1	0	101	106
Bm254990	0	1	0	1	0	0	1	0	0
Bm324109	61.6	65.77	75.79	82.34	115.31	87.37	79	90.49	53.73
Bm163473	0	1.67	0	9.48	29.52	37.88	34.53	17.6	0
Bm173707	1	1.55	0	1	0	1	1	5	3
Bm044398	0	3	6	17	19	5	6	6	4
Bm269859	4	0	2.44	0	0	0	2	0	3.06
Bm172525	3	0	8	0	0	0	0	0	0
Bm198885	2.12	4.11	6.63	23.55	19.79	18.93	10.13	28.23	14.51
Bm012098	11	0	6	0	0	0	0	1	0
Bm309082	0	0	0	0	3	2	2	3	0
Bm284681	0	0	0	0	7	5	0	3	1
Bm038399	0	4.21	4.63	8.47	5.89	3.75	20.28	2.76	15.18
Bm050881	124.51	118.8	130.42	399.97	441.55	509.66	278.76	361.96	445.11
Bm182202	35.95	5.81	33.89	17.93	10.41	16.36	43.44	17.33	23.06
Bm210646	30.97	52.3	34.95	8.95	11.92	21.53	17.13	12.58	14.2
Bm283536	0	0	0	2	0	6	3	1	2
Bm018349	40	289.24	39	295	612	400.47	165	156.85	203.67
Bm021356	0	1	0	0	0	0	0	1	0
Bm099959	13	0	24	2	1	0	0	27	0
Bm136995	2	13	8	3	14	6	9	3	0
Bm204248	18.53	6.67	3.62	0	0	0	0	0	0
Bm099814	7.49	0	0.29	5	3	0	0	2	0
Bm141249	121.18	173.66	69.93	14.12	32.71	0	76.82	73.53	73.75
Bm047545	94	163	116	93	85	92	87	113	90
Bm235289	54	16	56.04	0	0	0	0	44.57	71
Bm274465	0	0	0	2.56	8.47	5	3.85	5.38	4.01
Bm022189	5	0	2	6	5.14	0	9	0	0
Bm181172	0	0	0	3	7	2	5	6	13
Bm139080	1	0	0	0	0	1	0	3	0
Bm159188	5	1	7	0	2	1	3	3	5
Bm051871	2	0	6	0	1	0	0	0	0
Bm001550	0	0	0	0	0	0	0	0	5.05
Bm130804	0	0	0	2	1	0	0	0	0
Bm196000	9	3	7	0	0	0	0	2	3
Bm179812	1.26	0	0	2.21	0	3.3	3	3.09	0
Bm132426	68.16	37.99	108.46	6.96	17.41	10.38	20.51	52.74	12.75
Bm069453	1	6	2	0	1	2	1	3	1
Bm023327	2	4	3	2	0	0	0	3	1
Bm290026	113.69	261	154.76	187.88	155.71	111.45	174.86	200.29	186.3
Bm226706	54	32.1	63	325	275	305	228	276.88	180
Bm127302	0	0	0	0	0	0	0	1	0
Bm204166	0	0	0	0	1.05	0	1.05	2.1	0
Bm185573	0	0	0	6	0	0	2	0	0
Bm299899	1	0	0	0	1	0	0	2	0
Bm039860	0	0	0	18	5	0	5	11	8
Bm191739	69	22	62	0	1	1	0	60	82
Bm193597	5	16	6	0	0	0	0	50	48
Bm245930	0	0	0	3	0	0	5	0	0
Bm143508	68.6	58.73	68.2	19.76	5.88	5.73	0.93	20.39	0
Bm175340	5	3	2	35	31	16	16	20	17
Bm105942	0	55	0	29.61	0	0	32.15	0	0
Bm252694	0	0	0	0	1	0	2	1	0
Bm022449	4	0	8	0	1	0	0	0	0
Bm096551	0	3	0	1	0	0	6	0	0
Bm073958	0	1	0	1	0	0	1	0	0
Bm103817	34	10.28	24.12	4.44	24.47	29.95	22.47	21.29	16.39
Bm153321	366.97	293.88	472.5	153.58	212.79	156.4	212.93	232.39	172.75
Bm155185	648.18	486.97	744.62	703.99	796.01	667.94	573.4	599.08	650.02
Bm262545	19.35	34.97	12.53	19.43	23.42	26.13	19.01	28.14	19.84
Bm306708	1	5	5	0	0	0	0	0	0
Bm182655	2	0	3	0	2	2	0	1	0
Bm236916	8.79	16.03	54.96	25.82	21.36	22.88	23.4	0	0
Bm076162	0	0	0	7	0	0	0	0	0
Bm063498	3.06	5.07	8.13	12.7	6.19	8.27	5.39	2.15	8.87
Bm279813	10	0	10	0	7	7	0	9	7
Bm134364	0	0	0	0	0	0	1	0	0
Bm186936	0	0	1	0	1	0	0	2	0
Bm036968	3	4	5	19	28	26	3	6	5
Bm240281	4.8	39.88	25.66	10.4	1.5	0	6.59	12.5	17.1
Bm150797	0	0	0	0	0	0	7	0	0
Bm005081	0	0	0	0	2	1	1	0	0
Bm238431	0	18	0	17	0	0	16	0	0
Bm310795	81.76	119.15	105.71	31.24	43.12	29.98	59.45	26.57	49.95
Bm052395	2	0	2	0	2	3	0	0	1
Bm101499	6.54	41.47	19.21	0	0	10.64	0	4.79	7.02
Bm124066	35.18	12.07	62.94	0	29.86	0	15.53	27.02	0
Bm336443	43.84	13	36.03	0	0	0	0	36	40
Bm326516	605.85	378.26	682.93	233.09	231.11	220.48	173.46	145.02	167.32
Bm259925	0	4	0	3	0	0	1	0	0
Bm255941	0	0	0	0	0	1	1	0	0
Bm063194	3	5	7	0	0	1	2	0	3
Bm317083	0	0	0	0	2	0	2	2	5
Bm093888	10.68	12.62	14.13	23.56	42.1	25.98	28.76	49.41	69.97
Bm305847	14	19	21	15	18	14	15	15	15
Bm257436	17.76	8	20	0	4	0	1	10	14
Bm306261	14.05	58.83	9.94	0	0	0	9.3	11.88	9.41
Bm300790	73.86	65.42	65.95	31.25	22.07	21.95	31.13	48.99	34.46
Bm317834	29.49	6.41	32.89	0	0	0	0	42.56	49.9
Bm083441	0	9	1	2	0	0	2	0	0
Bm043950	1	0	1	83	90	59	80	53	37
Bm059221	8	2	5	0	0	0	0	0	0
Bm007788	2	0	10	0	5	0	0	0	0
Bm020477	1	0	1	5	2	6	0	3	5
Bm139160	0	0	0	2.32	3	1.55	1.14	2	0
Bm238962	1	0	5	5	13	5	0	4	3
Bm065444	0	0	0	13	9	12	5	3	4
Bm113134	7	0	5	0	0	0	0	12	10
Bm212100	0	0	0	4	2	2	0	0	0
Bm238648	0	0	0	0	0	1	0	1	0
Bm024436	3	6	0	2	0	0	2	1	3
Bm007514	0	0	0	0	2	0	0	0	0
Bm072457	0	0	0	2	0	0	0	1	2
Bm038621	6	4	5	16.79	13	15	14	13	10
Bm029763	7.87	4.75	0	50.48	11.4	48.75	19.97	41.41	8.1
Bm151618	0	0	0	15	23	28	17	6	11
Bm134344	0	0	0	1	3	1	6	0	1
Bm308668	5	3	6	0	0	0	0	0	0
Bm024959	0	0	0	0	4	3	0	0	0
Bm089912	0	7	3	3	1	1	4	2	1
Bm246353	1	0	4	0	2	1	2	3	0
Bm240825	27	13.29	23	20	21	21	8	32	20
Bm023821	0	0	0	4	1	1	2	0	1
[truncated: 223,627 more rows]
