# Supplementary material for: Variability in Leaf Color Induced by Chlorophyll Deficiency: Transcriptional Changes in Bamboo Leaves
Source: Preprints.org preprint supplement (doi:10.20944/preprints202311.0939.v2), 2023-12-27
Supplement: Supplementary file 2 [file supplementary › Table S4.tsv]

gene_id	Bm_G1	Bm_G2	Bm_G3	Bm_A1	Bm_A2	Bm_A3	Bm_GA1	Bm_GA2	Bm_GA3
Bm324511	0	0	0	0	0.197	0.978	0.502	0.206	0
Bm218421	0.747	1.171	2.211	0.366	0.773	0.31	0.056	0.268	0.764
Bm065720	0.922	0.391	0.392	0	0	0	0	1.576	0
Bm253245	0	0	0.141	0.09	0.202	0.371	0.137	0.189	0
Bm248056	0	0	0	0.196	0	0.645	0.199	0	0
Bm237047	0.349	0.585	0.148	0	0	0	0.145	0	0
Bm146294	0	0	0	0.778	0	0	0.789	0	0
Bm206830	34.549	55.62	34.86	55.011	44.527	44.392	46.782	49.468	41.404
Bm216211	0	0	0	0.211	0.42	0.578	0.107	0	0
Bm073236	0	0	0	0.116	0.347	0	0	0.241	0.351
Bm193955	0	0	0	3.258	8.403	7.281	20.272	13.538	11.712
Bm271849	0.665	1.254	0.141	0.271	0	0.298	0.138	0	0
Bm239973	0.712	0.347	0.158	0.068	0.071	0.076	0.073	0.149	0.113
Bm130443	0.379	0.528	0	0	0.103	0	0	0	0.208
Bm230429	0	0	0	0.648	1.359	1.489	1.205	1.46	0.436
Bm087887	0.155	0.39	0.527	0.127	0.126	0.139	0.513	0	0.256
Bm331700	0.223	0.307	0.269	0.158	0.301	0.462	0.512	0.52	0.265
Bm088778	1.375	2.436	1.416	0.473	0.655	0.596	0.638	0	0.578
Bm145454	0	0.684	0	0.333	0.166	0	0	0.173	0.168
Bm264402	0	0	0	0	0	0	0.19	0.877	0.473
Bm012584	1.311	0.059	0.579	0.031	0.033	0	0	0.903	1.008
Bm082669	1.106	0.737	1.438	1.19	0	0.67	0.035	0	0.275
Bm233107	2.646	1.385	1.948	1.004	0.508	0.759	0.578	0.829	0.484
Bm193638	0.578	0.642	0	0	0	0.363	0	0.216	0.161
Bm028387	2.203	1.681	2.27	2.465	3.287	2.517	4.357	3.9	3.655
Bm075765	0	0.609	0	0	0	0	0	0	0
Bm054047	0	0.382	0	1.303	0.928	0.204	0.945	0.194	0
Bm318316	0.555	0.946	0.387	2.076	0.991	1.017	1.167	0.939	1.743
Bm139097	1.574	3.691	1.471	0.642	1.152	1.128	2.345	1.07	1.557
Bm202054	0.334	0	0.512	0	0	0	0	0.447	0
Bm095942	0.365	0	0.164	0.154	0.23	0	0	0	0.078
Bm177971	0.417	0.944	0.491	1.251	0.947	0.949	0.696	1.259	1.007
Bm322511	0	0	0	0	0.256	0	0	0	0
Bm159911	0	0	0.37	0.634	0.946	0.689	0.477	0.332	0.933
Bm212841	6.339	6.053	6.517	9.777	9.092	8.859	9.685	11.018	8.469
Bm034759	0.51	0.427	0.867	0	0	0	0	0.759	0.736
Bm111700	0	0	0	0	0.972	0.612	0	0.29	0
Bm190611	0.486	0	0.413	1.361	1.296	1.083	1.045	1.033	2.15
Bm127436	1.379	2.11	1.745	0.553	0.494	1.266	0.537	0.681	0.502
Bm213915	1.336	0.882	1.357	0	0.043	0	0.084	0.116	0
Bm169414	20.824	17.835	20.303	48.224	48.777	53.007	39.71	49.304	45.537
Bm251897	0	2.008	0	0	0	0	0	0	0
Bm134005	0	0	0	1.807	1.001	2.095	2.649	0.837	0.507
Bm225927	3.21	9.679	3.311	2.701	1.631	2.606	2.736	2.685	1.82
Bm096740	0	0	0	0.16	0.318	0.35	0.162	0.166	0
Bm324516	23.017	11.211	21.197	85.782	106.411	110.804	69.569	71.654	73.892
Bm035381	0.559	1.152	0.895	0.401	0.359	0.648	1.21	0.702	0.868
Bm042350	1.225	0.975	1.302	1.852	1.771	2.276	1.871	2.02	1.299
Bm007136	1.174	0	1.442	0	0	0	0	0	0.215
Bm279452	0	0	0	1.761	6.046	5.157	2.383	0.408	0.198
Bm319491	1.217	0.291	1.182	0	0	0	0	1.625	2.437
Bm295350	0	0.468	0	0	0	0	0	0.237	0.461
Bm233347	0.075	0.11	0.03	0	0	0.027	0.052	0	0.028
Bm210596	0.026	0.005	0.012	0.06	3.073	0.002	0.017	3.075	0.012
Bm075503	0.095	1.349	0	0.077	0.077	0	0	0	0
Bm105657	0	0.549	0.139	0	0	0	0	0.278	0.135
Bm126185	7.258	1.728	7.616	4.57	7.038	5.719	5.765	7.024	3.699
Bm162553	0.422	0	0.048	0	0.142	0	0.793	0	0.01
Bm169810	6.939	0	5.113	1.007	2.652	0	2.17	2.228	2.43
Bm243201	2.713	2.229	0.55	0.34	0.8	1.179	1.254	1.665	0.567
Bm241789	0.205	0	0.228	0.153	0	0	0	0.4	0
Bm113384	0	0.598	0	0	0.139	0	0.145	0.292	0.146
Bm086582	0	0	0	0	0.251	0.415	0.384	0	0
Bm005958	3.685	18.392	2.716	7.556	1.839	4.612	8.176	3.696	6.177
Bm093605	0.564	0.189	0.576	0.184	0.275	0	0	0	0
Bm159493	0	0	0	0.131	0.131	0.432	0	0.137	0.265
Bm126765	0.404	0	0.172	0.165	0.164	0.181	0	0	0.333
Bm031036	0.072	0	0	0.175	0.349	0.128	0.237	1.156	0.649
Bm123324	0.32	0	0.178	0	0	0	0	0.133	0.401
Bm070750	0.605	0.169	0.171	0	0	0	0	0.685	0.665
Bm210923	9.441	8.825	8.594	13.337	13.784	16.537	12.309	13.363	12.586
Bm069827	2.06	0	1.872	0	0.693	0.7	0	0.483	0.527
Bm191131	0	0	0	0.15	0.149	0	0	0	0.303
Bm150181	10.122	1.109	11.499	0.232	0.308	0	0	1.286	2.184
Bm161295	9.941	12.328	10.74	0.075	0.049	0.244	0.234	0.238	0.159
Bm159858	7.735	9.923	6.613	5.1	4.769	2.916	5.201	4.574	5.418
Bm066729	0.449	0.278	0.382	0	0.548	0	0	0	0
Bm286497	0	0	0	0.298	0	0	0.453	0	0
Bm009010	0	0	0	0	3.2	4.231	0	3.822	2.874
Bm201957	0.377	0.309	1.686	0	0	0.041	0	0	0.266
Bm004278	0	0	0.495	0	0.473	0	0.723	0.989	0.72
Bm224413	0.479	0.197	0.603	0.398	0	0	0.196	1	0.19
Bm039898	0.51	0	0.954	0	0	0.183	0	0	0.084
Bm176876	0	0.173	0	0	0.168	0	0	0	0.171
Bm172372	0	0.227	0	0	0	0.243	0.336	0.23	0.112
Bm062921	154.041	131.442	160.756	100.664	98.708	91.8	98.854	101.958	84.287
Bm281384	0.259	0.361	0.954	0.282	0.14	0.155	0.214	0.073	0.071
Bm141846	0.648	1.343	0.513	2.069	1.979	1.893	1.541	1.43	3.172
Bm083249	0	0	0	0.296	1.104	0.568	1.199	0.462	0.672
Bm294331	0	0	0.266	0.255	0.508	0	0.259	0.266	0
Bm297839	2.154	0.902	2.902	0	0	0.308	0.427	1.106	0.142
Bm270346	0	4.85	1.23	0.394	0.588	0.432	1.598	1.025	0.199
Bm140600	0.359	0.162	0.469	0	0	0	0.153	0.097	0.103
Bm086081	0.323	0.08	0.757	0	0	0	0	0.358	0.7
Bm183032	0	0.487	0.165	0.474	0	0.347	0.16	0.329	1.118
Bm068671	0	0	0.349	0	0.167	0.921	0.34	0.349	0.339
Bm111843	29.5	20.897	29.209	96.801	89.301	113.189	78.106	87.262	70.659
Bm283694	0	0.425	0	0.138	0	0	0	0	0
Bm331988	0.106	0.153	0.048	0.079	0	0	0	0.209	0.056
Bm186627	0.605	0	0	0.308	0.061	0.068	0	0	0
Bm289675	0	0	0	0	0	0	0.309	0	0
Bm056956	1.171	0.075	0.613	0.073	0.513	0	0	0	0
Bm078775	0	0	0	0.316	0	0.394	0	0	0
Bm072476	0	0	0	0	0.32	0	0.326	0.335	0
Bm231649	0.746	0.312	0.317	0.456	0.758	0.668	0	1.109	0.308
Bm090371	0	0	0	0.684	0.682	0.376	0.867	0	0.173
Bm148457	30.897	23.774	32.445	10.465	10.616	7.186	11.427	14.896	16.994
Bm211104	0.332	0	0	0	0	0	0	0.564	0
Bm267438	0	0	0	2.582	0.643	0.177	0.819	1.009	0.816
Bm114626	0.778	0.362	0.588	0	0	0	0	0.735	0.713
Bm289160	0.727	0.622	0.122	0.122	0.354	0.132	0	0.246	0
Bm012202	1.398	0.909	0.524	7.324	3.416	6.14	8.362	7.361	4.829
Bm312227	0.125	0	0	0.612	0	0	0	0.568	0
Bm083157	2.209	1.667	3.546	5.807	7.901	10.187	3.928	8.621	6.992
Bm052624	0.811	2.446	0.414	1.323	1.451	2.325	2.148	1.516	0.936
Bm216274	0	0	0	0.661	0.501	0.893	0.965	0	0.72
Bm062312	0	0	0	0.518	0	0.817	0.732	0	0.319
Bm306983	1.203	0	0.54	0.572	0.339	0.518	0.323	0	0
Bm270954	0	0	0	0.25	0	0	0	0	0
Bm076328	1.545	1.859	0.761	0	0	0	0	0.1	0
Bm028275	0.333	0.093	0.189	0.045	0.271	0.348	0.184	0.188	0.183
Bm183716	0.683	2.257	0.555	5.003	6.591	5.786	4.703	5.951	8.615
Bm190202	0	0	0.054	8.544	13.395	11.498	8.51	43.574	37.485
Bm090590	0.512	0.515	0.522	0	0	0	0	0	0
Bm172733	0.165	0.122	0.205	0.065	0	0.211	0.062	0	0
Bm191207	0.548	0.459	0.233	0	0	0	0	0	0.226
Bm033551	0	0	0.153	0	0.294	0	0	0.46	0
Bm202526	14.153	16.189	13.978	0.463	0.735	0.663	1.043	1.134	0.881
Bm039411	0	0	0	0	1.239	0	0.14	0	0
Bm033156	0.127	0.397	0.229	0.651	0.448	0.604	0.559	0	0.61
Bm017830	0	0	0	0.497	0.66	0.364	0.672	0.345	0.167
Bm261694	0.667	0.559	0.486	0	0.078	0	0	0	0
Bm167477	0	0.194	0	0	0	0	0	0	0
Bm301487	0	0	0.409	0.393	0	0.431	0.398	0.818	1.785
Bm091029	0.188	0.674	0.222	6.234	4.363	6.056	3.693	5.359	4.959
Bm115057	1.542	0.176	1.37	0	0.057	0.021	0	1.092	1.83
Bm117541	0.261	0	0.222	0	0	0	0	0.222	0
Bm064370	0.279	0.117	0.237	0	0	0	0	0.237	0.115
Bm096589	0.198	0	0.758	0	0.081	0	0	0.084	0.245
Bm329891	0.318	1.6	0.271	0	0	0	0	0.271	0.525
Bm102287	0.825	0	0.651	0	0.287	0.158	0	0.401	0.097
Bm252329	0.34	0	0.807	0	0	0	0	0.202	0
Bm262976	0	0	0	0.117	0.233	0	0.356	0.243	0
Bm249993	0	0	0.243	0.159	0	0.585	0.25	0.464	0.286
Bm291913	21.888	34.136	22.702	2.247	4.925	2.96	3.419	3.042	3.405
Bm179629	0	0	0	0	0	0.238	0.439	0.226	0.219
Bm274654	0.093	0.543	0	0.377	0.075	0.166	0.306	0.315	0.229
Bm227897	2.475	0.949	3.27	0.073	0.073	0.027	0	2.94	3.885
Bm035690	0.006	0.489	0.464	0	0.651	0.261	0.572	0	0.247
Bm073877	0	0	0	0.362	0.06	0.265	0.245	0.063	0.061
Bm282717	0	0	0.115	0	0.658	0.846	0	0.687	0.222
Bm022893	0.121	0.101	0.411	0.197	0.197	0.433	0.3	0.308	0.199
Bm092226	0.463	0.873	0.295	0.095	0	0	0	0.098	0
Bm196051	0.235	0.885	0.1	0.192	0	0	0.097	0.1	0
Bm296852	0	0	0	0	0.278	0	0.424	0.29	0
Bm309623	0	0	0	0	0	0.3	0	0.711	1.656
Bm086129	0.676	0	0	0.846	1.151	0.313	0.969	1.813	0
Bm045336	0	0	0	0.893	0.889	0.392	0.724	0.372	0.18
Bm189305	0.598	0	0.347	0.46	0	0.288	0	0	0.316
Bm172667	0	0	0	0.27	0	0	0	0	0
Bm192036	1.188	0.418	1.693	0	0.874	0.398	1.788	1.136	0.764
Bm011340	0	0.604	0.459	0	0	0.161	0.447	0.459	0
Bm306957	0	0	0	0.71	1.416	0.78	0.721	0.74	0.718
Bm183428	0	0.38	0.253	0	0.2	0.058	0.2	0.099	0.255
Bm305358	0.909	0.628	0	0.886	0.337	1.066	2.303	1.097	1.36
Bm063919	3.966	5.651	4.43	1.831	2.806	1.712	2.499	1.732	2.655
Bm333220	78.301	39.71	93.456	11.932	15.403	12.928	21.621	21.021	21.237
Bm310531	1.833	1.873	3.078	0.806	0.608	0.344	1.69	2.518	1.475
Bm278614	1.032	1.081	0.658	0	0.21	0	0	0	0.426
Bm166481	0.206	0.086	0.306	0.126	0.209	0.046	0.171	0.306	0.17
Bm204062	3.042	1.881	2.032	2.127	1.649	2.076	2.338	1.847	2.448
Bm088056	1.034	1.587	1.171	0.422	0.14	0.695	0.357	0.439	0.852
Bm285952	0	0	0	0.211	0.525	0.809	0	0	0
Bm175845	0	0	0	0.239	0.476	0.262	0	0	0.242
Bm279697	0.457	1.192	0.785	2.46	2.409	2.279	1.57	2.802	1.569
Bm202795	0.734	0	0.461	0.212	0.347	0.464	0.444	0.13	0.651
Bm331845	0	0	0.141	0.184	0	0	0	0.195	0
Bm295985	0	0	0	0.367	0.366	0	0.559	0.191	0.186
Bm078950	0	0	0	0	0.328	1.686	0.445	0	0
Bm274065	0	0.238	0	0	0	0	0	0	0
Bm062667	174.377	50.282	161.662	19.332	22.349	19.954	46.161	46.314	47.93
Bm331378	0	0	0	0	0.491	0.992	0	0.257	0.083
Bm262289	0.392	0.493	0.666	0	0	0.176	0	0.333	0
Bm017794	1.535	1.363	0.776	0.243	0.128	0	0.132	0	0.478
Bm045712	0	0	0	0.12	0	0	0	0.26	0
Bm245956	1.979	2.921	2.062	0	0	0	0	0	0
Bm018113	0.901	0	0.356	0	0	0	0	0.575	0.659
Bm228945	0.61	1.379	0.916	0.536	0.191	0	0.427	0	0
Bm021980	3.476	2.357	3.447	0.203	1.211	0.667	0	0	0.546
Bm137772	0	0	0.673	0.215	0	0	0.218	0	0.217
Bm278876	1	0.807	0.307	1.454	0.325	1.121	1.463	1.615	0.153
Bm140162	0	0.131	0.133	0	0	0	0.26	0.133	0.388
Bm203427	0.362	0	0.459	0	0	0	0	0.128	0
Bm110715	3.258	2.684	2.592	0.966	0.991	1.303	2.553	1.17	0.608
Bm135913	0.897	0.154	0.74	0	0.148	0	0	0	0.23
Bm298007	0.168	0.282	0.143	0	0.137	0	0	0.286	0
Bm020215	0	0.156	3.366	0.043	0.388	0.333	0.044	5.811	5.03
Bm104648	0.415	0.522	0.353	0	0	0	0.859	0.353	0
Bm331285	0	0.16	0.001	0	0.039	0	0	0.163	0
Bm031732	2.465	0	0.798	0	0	0	0	1.642	1.669
Bm004801	3.507	3.704	4.168	2.954	3.564	3.121	3.221	3.016	2.979
Bm083378	0	0	0	0	0	0	0	0.669	0
Bm259728	10.053	10.383	11.757	9.687	10.805	11.789	11.678	10.464	8.981
Bm202822	0	1.225	0	0	0	0	0	0	0
Bm022346	6.146	4.307	5.121	0.553	0	0.303	0.421	0.599	1.396
Bm174332	0	0	0	0.698	0.348	0.383	0.177	0.545	0.176
Bm055720	1.172	0.628	0.895	0.193	0.459	0.12	0	0.253	0.366
Bm072367	0.471	0.166	0.583	0.972	0.404	0.267	0.385	1.097	0.246
Bm123453	0	0	0	0.119	0	0	0.121	0.372	0.24
Bm223327	6.174	4.471	4.893	1.195	1.191	1.031	0.866	0.978	1.208
Bm012582	0.27	0	0.25	0	0.325	0	0.075	1.016	0.766
Bm328886	0	0	0	0.597	0	0.131	0.242	0.249	0.723
Bm040419	0.523	0.215	0.532	1.18	1.195	1.43	0.774	1.092	1.118
Bm218014	0.108	0	0.276	0	0.176	0.097	0	0.276	0
Bm335718	0	0	0	0.094	0.934	0.103	0.095	0	0
Bm330720	0	0	0	0.404	0	0	0.547	0	0
Bm253469	0	0	0.994	0	0	0.315	0	0	0
Bm227921	1.733	2.487	1.002	0.794	0	0.692	0.225	0.662	0
Bm298948	0.452	0.814	0.445	0.066	0.21	0.07	0.066	0.376	0.296
Bm082118	0	0	0	0	0	0	0	0	0.423
Bm244043	0	0	0	0.653	0.434	0.797	0.589	0.151	0.147
Bm088690	0	0.255	0.466	0.874	0.054	0.527	0	0.424	0
Bm083757	0	0	0	0	1.316	0.242	0.335	0.229	0
Bm317497	0.22	0.631	0.208	0.029	0	0	0.087	0	0.058
Bm015018	0	0	0	0	0	0	0	0.347	0
Bm295612	0	0	0	0.171	0.343	0.202	0.476	0	0.139
Bm191267	1.843	0.426	1.641	0.014	0	0	0.029	1.492	2.098
Bm040035	0.217	0.545	0.276	0	0	0.097	0	0	0
Bm064782	0	0	0	0	0.319	0.702	0.324	0.333	0.323
Bm195648	0.86	0.103	0.332	1.25	1.631	1.714	0.605	0.712	0.957
Bm219403	0	0	0	0	0.818	1.652	1.527	0.712	0.138
Bm121609	10.918	9.596	10.042	5.112	8.442	8.339	8.891	7.454	6.199
Bm020845	0.939	0	0	0	0.221	0	0	0	0
Bm199530	2.041	0.4	1.983	0.065	0.022	0	0	2.546	1.945
Bm083947	4.243	3.028	4.298	4.774	1.967	4.264	2.144	7.41	3.317
Bm187126	0	0.23	0.117	0.785	0.447	0.739	0.341	0.818	0.453
Bm291404	1.045	0.278	1.127	0	0	0	0	0.755	1.339
Bm121565	0	0	0.064	0.186	1.049	0.272	0	0.645	0.25
Bm117714	0	0	0.843	0.012	0.024	0	0.012	0.741	0
Bm097372	0.414	0.173	0.176	0.338	0.168	0	0	0.176	0
Bm292853	0	0	0	0.165	0	0.543	0	0.172	0.167
Bm287209	6.998	3.627	5.709	7.348	4.96	10.69	6.215	7.315	1.697
Bm085980	1.12	0.54	0.298	1.321	0.846	1.112	0.36	1.197	1.894
Bm154433	0.278	0	0.118	0	0	0	0	0.473	0.23
Bm036301	1.074	0	0.548	0	0	0	0	0	0
Bm126425	14.265	18.546	15.73	19.085	16.983	20.403	21.034	26.476	28.26
Bm316240	0.469	1.876	2.034	0	0.629	0	0.35	0.39	0
Bm145806	0.758	0	0.43	0	0.617	2.491	0.628	0.215	0.625
Bm027168	0.133	0	0.252	0	0.108	0	0	0.113	0
Bm080899	6.598	2.806	8.189	9.199	10.981	12.012	10.863	8.238	9.538
Bm279495	0	0.459	0.071	2.593	3.9	4.389	2.966	3.396	1.947
Bm224462	0	0	0	0.692	0.615	0.393	0.415	0.723	0.69
Bm300803	33.361	36.206	33.461	13.961	9.998	9.156	22.458	18.23	21.373
Bm101890	1.423	0	0.806	0	0.193	0	0	0	0
Bm008104	1.272	0.891	1.171	0.679	0.798	0.726	0	0.869	0.713
Bm081889	0	0	0.125	0.388	1.205	0.274	0.88	0.168	0.13
Bm186679	3.185	1.729	3.272	1.702	2.159	0.863	2.865	2.083	2.574
Bm229106	0.476	0	0.402	0	0.064	0	0	0.201	0
Bm175356	0.001	3.507	2.199	3.564	1.661	3.256	4.163	2.506	3.068
Bm296535	0.251	0.21	0	0	0	0	0	0	0
Bm009668	0	0	0	0	0	0.121	0.058	0	0
Bm022180	0	0	0	0.691	1.033	0.569	0.175	0	0
Bm130087	0.24	0.804	0	0.196	0.195	0	0.199	0	0
Bm335524	2.142	2.603	1.449	1.952	2.635	3.057	2.392	2.533	1.957
Bm218077	0.273	0	0.079	0.15	0.298	0.247	0.076	0.547	0.378
Bm328669	0	0	0	1.31	0	0	0.664	0	0
Bm320642	0	5.1	0	15.679	0	0	22.524	0	0
Bm128996	1.024	0.766	1.737	2.565	1.136	1.747	0.748	1.26	1.74
Bm240349	0.655	0.183	0.371	0	0	0	0	0	0
Bm198054	0	0	0	0	0	0.283	0	0	0
Bm244073	1.369	3.251	2.348	2.426	5.644	6.923	4.885	4.128	4.276
Bm084700	0	0.624	0	0	0	0	0.617	0	0
Bm130012	0	0	0.091	2.305	4.081	2.968	1.179	1.769	2.601
Bm260583	0.192	0	0.653	0	0	0	0.636	0.163	0
Bm229791	1.01	0	1.031	0	0	0	0	0	0
Bm229042	1.513	2.654	2.767	0	1.513	0	0	0	2.762
Bm213806	1.838	0.914	2.551	0	0	0.081	0	0.232	0.15
Bm200327	0	0	0	0	0	0.321	0.297	0	0
Bm020521	0	0	0.297	0	0	0	0	0.081	0
Bm004185	0	0	0	0	0	0	0.331	0	0
Bm174957	0.091	0.841	0.428	0.258	0.226	0.109	0.125	0.424	0.083
Bm132221	2.002	5.272	1.473	0.921	0.46	0.848	1.071	1.365	0.523
Bm324560	1.328	0.101	0.103	0	0	0	0	0	0
Bm119374	0	0	0.171	0	0	0	0	0	0
Bm077095	14.669	17.307	15.227	4.865	7.16	4.043	7.974	9.351	5.824
Bm017500	0	0	0	0.694	0	0	0.704	0	0
Bm063866	0	0	0	0	0.16	0.528	0.163	0	0.162
Bm292644	0	0	0	0.17	1.101	0.373	0	0	0
Bm129577	0.83	0.307	0.872	0.02	0	0.022	0	1.017	1.047
Bm114583	1.316	0.3	2.063	0.073	1.609	1.281	1.092	0.235	0.772
Bm039470	0.108	0.091	0.644	1.06	2.465	2.813	0.717	0.092	0.357
Bm308654	0	0	0	0	0.591	0	0	0	0
Bm230093	0	0	0.112	1.299	1.383	0.141	0.752	1.079	1.243
Bm256700	1.529	0.797	1.056	0.138	0	0.084	0.642	0.571	0
Bm247431	0	0	0.109	0	0	0	0	0.543	0.105
Bm129306	5.71	0	4.434	2.07	2.436	2.748	4.404	2.305	2.138
Bm283877	0.335	0.216	0.18	0	0	0	0	0	0
Bm298566	0	0	0	0.213	1.275	0	0.216	0	0
Bm264369	0	0.19	0	0	0	0	0	0.289	0
Bm312072	0	6.365	0	0	0	0	0	0.346	0.112
Bm040281	0	0	0	0.918	2.859	1.764	1.048	1.434	1.276
Bm212081	0.117	0.49	0	0.286	0.285	0	0.194	0.099	0.096
Bm161860	0	0.574	0	0	0	0	0	0	0
Bm264407	1.84	2.661	2.823	3.247	1.538	1.888	3.719	2.377	2.811
Bm109098	0.804	3.591	2.05	1.312	2.179	1.2	0.444	0.683	0.221
Bm060894	20.733	22.671	18.893	17.463	17.682	16.502	14.222	18.33	17.226
Bm044150	1.057	0.316	1.112	0.021	0.02	0	0	1.475	1.411
Bm017803	1.564	1.516	1.249	0.24	0.232	0.144	0.147	0	0.236
Bm250361	3.848	4.842	4.14	5.543	4.544	5.018	4.841	4.856	4.795
Bm018490	0.429	0.359	0	0	0	0	0	0.182	0.353
Bm026049	0.094	0.23	0.071	0.073	0.154	0.255	0.087	0.152	0.394
Bm246082	0.178	0.56	0.414	0.637	0.144	0.428	0.14	1.519	0.711
Bm220873	0	0	0	2.095	0	0	0	0	0
Bm241866	1.33	0	1.319	0	0	0	0	0	0
Bm275891	4.239	4.972	4.942	1.384	0.788	0.977	1.905	1.75	1.598
Bm036877	0.691	1.158	0.294	0.282	0	0	0.572	0	0
Bm276952	0.922	0.601	1.22	2.342	1.5	1.745	0.339	0.261	0.676
Bm155240	0	0	0	0.215	0	0.236	0	0	0.867
Bm263695	0	0.156	0	0	0	0.167	0.308	0	0
Bm172806	0.597	0.817	0	0.296	0.321	0.191	0.489	0.715	0.466
Bm063316	0.181	1.563	0.738	0	0	0	0.082	0.085	0
Bm257072	0	0	0.197	0.566	1.129	0.829	0	0	0
Bm118917	0	2.126	0	0.433	0	0.006	0.122	0	0.424
Bm266158	0	0	0	0.566	0	0	0.575	0	0
Bm266174	0	0	0	0	0.205	0	0	0	0
Bm215827	0.552	1.797	0.938	1.43	1.556	1.923	1.576	1.208	1.189
Bm193515	0.83	0	0.263	0	0	0	0	1.486	1.571
Bm157978	6.205	3.809	5.847	6.36	10.381	7.885	15.944	12.114	13.527
Bm088392	0.409	0.457	0.232	0	0	0	0	0	0
Bm247881	0	0	0	1.022	0	0	1.452	0	0
Bm001757	0	0	0	0.475	0.237	0.521	0.401	0.495	0.56
Bm136848	0.303	1.017	0	0.248	0	0.272	0	0	0
Bm011573	1.04	0	0.707	0	0	0.186	0.086	0.177	0
Bm051865	0	0	0	0.266	0.426	0	0	0	0
Bm210739	3.412	2.144	1.45	0.696	0.52	0.382	0.53	0.544	0.352
Bm028045	0	0	0	0.486	0	0	0.247	0	0
Bm037607	1.437	2.288	0.611	0.117	0	0.258	0	0.244	0.237
Bm119948	0.114	0.286	0	0.093	0	0	0	0.29	0
Bm075659	0	0.036	0	0	0.003	0.119	0	0	0.851
Bm197874	0.977	2.046	0.969	0.133	0.927	1.896	1.348	0.138	0.671
Bm145640	0.245	0.206	0.104	0	0	0.11	0	0	0
Bm304757	1.581	0.386	1.064	0	0	0	0	1.512	1.738
Bm125945	0.209	0	0.177	0.17	0	0	0.173	0	0
Bm116822	0	0	0	0.923	0.739	0.854	0.353	0.162	0
Bm074710	0	0.143	0	1.024	0	0	0.85	0	0
Bm036787	0	0	0	0.289	0.114	0	0.271	0.247	0.012
Bm148632	0	0	0	0	0	0	0.217	0.223	0
Bm129500	0.274	0	0.457	0.258	1.497	1.155	1.651	1.159	0.838
Bm060030	0.463	1.357	0.62	0	0.063	0	0.177	0.066	0.065
Bm089340	0.166	0	0	0	0	0	0	0	0.481
Bm057031	0.508	0.17	0.259	0	0	0	0	0.173	1.509
Bm071755	8.6	5.854	11.881	9.211	8.961	6.502	6.675	9.594	8.2
Bm198449	0.404	0.339	0.429	0	0.246	0	0	0	0
Bm026739	0	0.787	0	0	0	0	0	0	0
Bm219988	0	0.264	0	0	0	0	0	0	0
Bm168037	0	0	0	0.207	0	0	0.21	0	0.209
Bm161998	0.278	0	0.472	0.453	0	0	0.23	0	0
Bm079669	0.521	0	0.221	0	0.212	0.233	0	0.443	0
Bm253017	1.687	1.785	1.106	0.494	0.996	0.653	0.913	1.085	0.891
Bm108976	0	0.125	0	0.366	0	0	0.494	0	0
Bm110639	2.297	0	0	0	0.276	0	0	0	0.745
Bm105175	7.372	11.737	7.069	4.659	6.596	5.58	6.37	6.159	7.395
Bm000152	0.397	0.166	0.338	0.324	0.889	0.534	0.329	0.507	0.082
Bm128036	0	0	0.316	0	0	0	0	0	0
Bm262916	64.816	64.234	60.956	61.732	71.002	67.974	69.619	65.571	70.684
Bm046981	0	0	0	0.957	0.089	0.145	0.192	1.319	1.161
Bm000308	0.134	0.209	0.145	0	0.048	0.269	0	0.104	0.133
Bm138377	0	0	0	0	0.1	0.329	0	0.312	0.404
Bm285907	0	1.447	0	0	0	0	0	0	0
Bm193912	491.481	156.49	155.527	13.856	8.114	16.77	27.965	120.836	159.246
Bm171875	0.127	0	0.027	0.884	2.047	1.513	0.501	0.948	0.867
Bm080683	8.049	10.738	11.404	4.378	4.848	2.671	4.196	6.587	4.179
Bm205781	0	0.446	0	0.76	0	0	0.331	0	0
Bm206927	0.129	0	0	0	0.42	0.347	0.107	0	0
Bm198932	0	2.281	0.194	0	0	0	0.417	0	0.744
Bm008128	6.034	2.854	5.162	5.911	5.353	6.488	5.751	7.019	5.245
Bm227528	0.333	1.251	1.655	0	0	0	0	0	0
Bm117627	0.33	0	0	0.614	0.292	0	0	2.3	1.479
Bm262435	0	0	0	0.459	0	0	1.164	0	0
Bm224835	0.47	0	0.533	0	0	0	0	0.133	0.388
Bm293959	0	0	0	1.625	1.408	0.465	0.143	1.03	0.571
Bm166180	1.081	0.453	0.919	0	0	0	0	1.531	0.446
Bm151613	4.745	2.192	3.583	4.779	4.648	2.968	3.632	4.621	2.9
Bm283435	0	0	0	0.61	2.092	0.595	0.687	0.564	0.342
Bm074096	0	0	0	0	0	0.241	0	0	0
Bm283632	0	0.098	0.135	0.193	0.52	0.983	0.108	0.206	0.087
Bm090999	0.265	0.667	0	0.217	0	0	0	0.226	0
Bm212223	0	0	0	0.424	0.845	0.466	0.676	0.189	0.49
Bm256481	1.607	1.064	1.629	0.008	0.502	1.035	0.076	0.072	0.097
Bm057462	0.156	0.131	0	0.128	0	0.14	0.259	0.133	0.387
Bm166504	1.439	0	0.597	0	0	0.203	0	0	0.12
Bm173291	1.15	0.289	0.782	0	0	0.052	0.048	0.098	0
Bm081778	0.193	0	0.328	0.157	0.157	0	0.319	0.164	0
Bm040912	0	0.441	0	0	0	0.236	0	0	0
Bm068500	0	0	0	0	0	0.07	0	0	0
Bm193695	0.293	0.245	0	0	0	0	0	0	0
Bm008602	0	0	0.066	0.382	0.318	0.28	2.198	0.664	0.258
Bm193957	0.222	0	0.377	0	0	0	0	0	0
Bm293466	1.77	2.847	2.247	2.186	2.096	2.255	2.396	2.663	2.689
Bm249398	2.18	1.924	2.217	3.081	2.493	2.549	2.687	2.525	2.246
Bm169138	0.809	0	0	0	0	0	0	0.229	0.222
Bm210605	0	0	0	0	0	0.215	1.986	0	0.198
Bm023374	0	0	0	0.237	0	0	0	0	0
Bm246753	0	0.243	0.149	0.183	0.127	0	0.141	0	0.14
Bm225599	0	0	0	0.131	0.261	0	0	0.273	0.132
Bm179190	0	0	0	11.059	2.643	2.941	0.81	0	0.176
Bm253089	2.897	5.165	2.574	2.983	1.387	1.466	2.186	1.805	1.332
Bm141859	1.055	0	0.873	0	0.063	0	1.456	1.068	0
Bm174636	2.187	1.068	0.816	0.33	1.011	1.597	1.35	0.603	0.553
Bm071690	0	0	0	0	0.47	0.104	0.575	0.59	0.381
Bm096712	0	0.19	0	1.109	0	0	1.453	0	0
Bm063022	1.177	1.242	0.538	0.041	0.172	0.48	0.042	0.197	0.083
Bm159636	0	0	0	0.948	1.89	2.604	3.208	2.634	2.556
Bm263404	0	3.236	0	6.173	0	0	12.126	0	0
Bm296803	0	0	0	0.38	0.191	0.314	1.077	0.419	0.551
Bm291920	0.955	0.614	1.545	2.022	3.969	3.075	1.457	4.203	2.538
Bm105466	0.453	0	0.409	0.151	0	0	0.634	0.163	0
Bm019157	0	0	0.083	0.64	0.637	0.966	1.298	0.416	1.454
Bm002703	0	0.209	0	0.203	0	0	1.237	0	0
Bm311372	0	0	0	0.144	0.143	0.474	0.292	0.3	0.436
Bm178338	4.614	2.017	3.752	0	0.326	0	0	0	0
Bm171796	0	0	0	0.2	0	0.22	0.203	0.834	0.607
Bm203854	0	0.902	0	0.352	0	0	0.178	0	0
Bm244669	0	0	0	0	0	0.334	0	0	0
Bm081932	0	0.904	0	0	0	0	0	0	0
Bm124908	0	0	0	0.205	0.137	0.756	0.977	0	0
Bm057343	0.684	2.722	0.422	0.125	0.181	0.128	0.063	0.059	0
Bm112232	0.31	0.258	0.762	0.176	0	0.268	0	0.085	0.164
Bm093033	6.252	21.316	8.951	3.923	2.3	2.003	5.16	2.877	3.405
Bm319383	0	0	0	0.304	0.378	0.083	0.308	0.158	0.077
Bm151565	0.587	2.334	0.291	0.04	0	0	0.121	0.083	0
Bm303294	5.131	1.563	5.222	10.552	8.724	8.01	11.747	10.307	9.936
Bm024173	0.479	0.913	0	0.523	0.702	0.505	0.977	0.309	0.23
Bm297556	0.137	0	0.178	0.072	0	0.079	0.119	0	0.145
Bm292874	0.03	0	0	0.71	0	0.274	0.482	0.341	0
Bm253643	0.297	0.249	0	0	0.725	0.532	0	0.505	0.245
Bm033082	0.143	0.6	0.609	1.161	0.911	0.846	0.173	0.906	0.132
Bm082209	0.393	2.213	0.811	2.044	0.27	0.876	0.467	0.903	0.703
Bm191759	2.564	4.972	1.841	2.355	3.242	2.686	4.759	2.451	3.555
Bm088760	1.834	0.766	2.279	0	0.027	0.059	0	1.818	2.309
Bm015869	0	0.059	0	0.557	1.538	0.177	0	1.183	0.975
Bm078026	2.257	4.668	2.229	0.559	1.073	1.42	0.264	0.903	0.37
Bm219285	0.752	0	0.256	0	0	0	0	0	0
Bm038239	2.455	4.894	3.085	1.421	3.185	0.891	0.969	2.486	0.555
Bm255279	0.146	0.244	0	0	0	0	0	0.124	0.12
Bm154573	0	0	0	0.268	0	0	0	0	0.271
Bm304257	0	0	0	0	0	0.349	0.322	0.331	0.16
Bm188358	1.768	2.336	1.747	0.929	0.749	1.02	1.811	1.894	1.421
Bm177991	3.029	1.384	2.809	0	1.791	0	0	0	0
Bm025929	0.136	0	0.087	0	0.248	0.638	0	0.317	0.559
Bm208235	0	0	0	0	0	0	0.563	0	0
Bm001557	0	1.624	0	2.09	0	0	1.272	0	0
Bm298092	0.498	0.19	0.615	0	0	0	0	0.385	0.373
Bm258943	0	0	0	0	0.924	0	0.47	0	0
Bm249129	0	0	0	0.456	0.306	0.236	0.269	0.546	0.124
Bm080764	0.989	3.373	0.742	0.629	0.555	0.372	1.523	0.805	0.346
Bm063169	1.407	1.179	0.997	0	0	0	0.582	0	0.58
Bm118462	9.243	6.911	9.592	18.596	26.179	15.038	22.342	12.762	20.322
Bm111698	0.144	0	0	0	0	0	0	0	0.474
Bm277547	0.971	0.203	0.482	0.066	0	0	0	0	0
Bm139741	0	0	0	0	0.414	0.114	0	0.325	0.42
Bm229794	0	0	0	0	0	0	0.256	0	0.255
Bm307138	0	0	0	0	0.353	0.13	0.24	0	0.239
Bm318980	9.474	13.576	10.418	6.146	5.39	6.052	8.672	8.072	8.018
Bm103420	0	0	0	0.191	0.175	0.622	0.447	0.162	0
Bm099335	2.203	1.988	2.017	1.521	1.034	1.746	1.128	2.665	1.048
Bm205944	2.741	3.264	3.045	2.921	3.364	4.12	2.964	4.231	5.105
Bm208396	0	0	0	0.223	0.333	0.734	0.565	0	0
Bm199695	2.036	0.637	0.663	1.825	0.858	1.354	0.832	0.745	0.179
Bm319381	2.002	6.469	3.953	0	0	0	0	0	0
Bm033835	0.581	0	0.277	0	0	0	0	0.123	0.239
Bm148472	0.257	0.214	1.025	0.032	0	0.017	0.048	1.605	0.901
Bm333245	0.311	0	0.529	0	0	0	0.086	0.264	0.342
Bm333969	0	0	0	0.047	0.094	0.026	0.406	1.03	1.238
Bm052987	0.236	0.396	0.201	0	0	0	0.196	0.201	0
Bm117071	0.299	0	0.085	0.081	1.215	0.892	0.082	0.423	0.986
Bm015208	0	0	0	0.093	0.278	0.204	0.189	0.387	0
Bm279142	0.143	0.883	0.665	0.079	0	0.087	0	0.106	0
Bm327912	0	0	0	1.279	0.418	0	0.142	0.146	0.353
Bm089147	0	0	0	0	0	0	0.754	0.155	0
Bm015183	6.029	0	4.956	0	1.945	2.054	0	2.372	2.26
Bm082471	1.596	0.389	0.578	1.331	1.086	0.873	1.635	1.821	1.35
Bm326344	0	1.174	0	0.915	0	0	0.58	0	0
Bm188651	14.71	12.776	11.631	6.71	7.765	6.768	7.316	7.344	8.697
Bm162486	0	0	0	0.737	0	0	0.935	0	0
Bm149479	0.874	0.157	0	0	0	0.708	0	0	0.242
Bm336224	0	0	0	0.407	0.406	0.298	0	0.141	0
Bm151372	0.117	0	0.025	0.405	1.495	1.124	0.338	0.372	0.433
Bm324092	0	0	0	0	0	0	0	1.107	0
Bm224517	0	0	0	0	0.55	0.267	0.494	0.253	0.243
Bm086304	0	0	0	0.162	0	0	0	0	0
Bm035204	0.397	0	0	0.108	0.108	0	0.11	0	0.218
Bm222064	0	0	0	0.605	0.452	0.249	0.537	0.394	0.306
Bm117393	0.2	0.084	0.256	0.164	0.163	0.18	0.415	0	0
Bm244200	0.693	0.116	0.589	0	0.113	0	0	0.471	0.686
Bm001492	0.674	0.753	0	0	0	0	0.186	0	0
Bm115814	0.288	0.397	0.368	0	0	0	0.153	0.184	0.182
Bm252971	3.836	53.789	3.493	0.95	0.549	0.197	1.606	0.967	2.299
Bm078745	0.208	0.087	0.089	0	0	0	0	0.531	0.343
Bm261368	0.229	0.383	0.389	0.187	0	0.205	0.189	0	0.189
Bm075144	0	0	0	0	0	0.609	0	0	0
Bm120391	0.767	0	0.209	0.209	0	0	0.212	1.087	0
Bm042615	0	0	0	0.286	0.456	0.063	0.523	0	0.058
Bm037845	0	0	0	0.62	0.088	0	0.539	0.646	0.448
Bm021152	0	0	0	0	0	0	0.855	0.175	0.681
Bm110552	28.151	18.416	25.161	32.145	29.231	25.959	30.481	39.218	22.142
Bm261239	3.071	2.205	2.61	1.074	0.832	1.179	2.058	1.491	1.567
Bm181633	0	0	0	2.062	2.055	3.418	1.831	1.745	1.563
Bm013432	0	0.26	0.132	0	0.378	0	0.385	0.264	0
Bm269577	0.486	0	1.238	0	0	0	0	0	0
Bm276392	1.164	0.731	0.495	0.475	0	0	0.482	0.247	0.48
Bm049384	1.007	2.666	1.343	11.401	10.25	10.981	30.747	21.472	32.87
Bm316851	7.56	4.687	6.799	10.312	10.01	10.899	8.165	9.322	10.335
Bm092059	0.266	0.112	0.453	0	0	0	0	0.453	0.329
Bm125724	0	0	0.317	0	0	0	0.309	0	0
Bm327681	218.619	59.253	205.127	207.386	322.729	238.444	211.015	235.747	263.19
Bm319316	1.38	3.862	1.407	0.086	0	0.079	0	0.087	0.433
Bm088445	1.53	2.854	1.137	1.625	0.404	0	0.751	0.594	1.411
Bm081344	0.381	0.7	0.12	0.172	0.173	0.13	0.303	0.119	0.12
Bm319447	0.439	1.897	0.654	1.597	1.851	2.129	0.936	1.479	2.611
Bm292559	0.679	0	0.288	0	0	0	0	0	0
Bm307858	0	0	0	0.27	0.134	0	0.274	0.141	0.545
Bm031590	0	0	0	4.867	6.276	9.408	5.217	4.01	1.938
Bm010784	0.367	0.307	1.248	0	0	0	0	0	0
Bm292876	0	0	0	0	0	0	0	0.131	0
Bm277156	0.118	0	0.1	0	0.096	0.106	0.293	0.201	0.389
Bm267921	0.825	0	0.701	0.449	0	0	0	0	0
Bm283372	0	0	0	0.219	0	1.445	0	0	0
Bm068695	0.942	0	0.687	0	0	0	0	0	0
Bm172781	1.783	0.739	3.005	1.612	2.556	0	1.073	2.814	0
Bm027288	0	0.048	0	0.383	0	0	0	0	0
Bm212513	0.795	0	0.338	0.486	0.162	0	0	0.169	0
Bm191565	0	1.082	0	0.117	0.117	0	0	0	0
Bm047529	9.036	9.53	9.584	11.182	12.147	11.577	12.25	12.142	9.385
Bm025197	0.247	0.718	0.251	0.736	0.559	0.672	0.483	0.462	0.821
Bm111416	39.746	65.645	47.796	6.064	5.124	4.488	12.306	10.848	11.191
Bm121047	0.177	0.444	0.451	0	0.072	0.079	0.805	0.451	0.437
Bm071631	5.147	4.617	3.742	3.222	2.13	2.497	2.482	3.208	2.836
Bm119313	0	0.415	0	0	0.293	0	0.303	0	0
Bm120482	7.397	3.754	1.988	3.286	1.555	7.882	13.361	11.173	9.175
Bm204710	0	0	0	0.226	0.112	0	0.458	0.235	0
Bm168147	0	0.253	0	0	0	0.271	0	0	0
Bm294195	0	0	0	0.578	0.542	0.784	0.621	0.177	0.103
Bm295442	0	0	0	0.27	0.269	0.593	0	0.422	0
Bm062007	0	0	0	0.296	1.769	1.137	0.3	0	0
Bm180935	0.297	0.407	0.219	1.24	0.874	1.895	0.845	0.628	0.594
Bm112386	0.239	0.196	0.2	0.373	0.879	0.363	0.839	0.172	0.613
Bm072076	0	0	0.707	5.941	13.194	13.046	10.161	6.364	5.146
Bm177231	0	0	0	0	0	0	0	0.266	0
Bm330741	0	0	0	0.54	0.403	1.333	0.821	0.562	0.409
Bm335058	4.645	6.898	4.487	1.723	0.343	0.946	2.272	5.383	5.049
Bm065627	5.833	2.073	3.756	0.288	0.862	0.158	0.293	0.451	0.291
Bm064553	0	0	0	0	0.292	0	0.594	0	0
Bm074551	0	0	0.172	0	0	0	0	0	0
Bm178846	0	0	0.111	0	0.637	0.234	0.108	0.555	0.431
Bm081591	0	0	0	0.189	0	0	0	0	0
Bm215792	0.332	0	0.376	0.09	0	0	0.183	0.282	0.091
Bm013535	0	0	0	0.258	0	0	0	0	0
Bm255699	0.094	0.158	0	0.308	0	0.339	0	0	0.39
Bm038584	1.277	1.751	1.283	0	0.094	0.832	0	0.197	0
Bm287655	0	0.164	0	0	0	0	0.162	0	0
Bm232006	0	0	0	0.306	0	0.168	0.466	0.16	0
Bm183900	5.469	1.753	6.08	16.639	15.778	15.371	18.941	19.909	17.026
Bm070214	0	0	0.166	0.142	0	0	0	0	0.392
Bm191780	0.875	0	0.297	0	0.142	0.313	0	0.149	0.288
Bm148474	0.371	0	0.105	0	0	0	0	0.315	0.611
Bm273085	10.821	6.672	11.553	80.664	80.178	103.62	46.298	67.687	77.948
Bm304513	0.48	0.604	0.771	0.534	0.873	0.846	0.826	1.384	0.376
Bm272340	1.435	1.399	3.107	3.814	2.211	1.723	0.942	1.945	1.059
Bm192666	0	0.428	0	0	0	0.098	0	0	0
Bm079930	0	0.173	0	0	0	0.13	0	0	0.124
Bm323743	0.945	1.98	3.079	0.323	0	0	0.922	0.238	0.349
Bm076297	0	0	0	0	0	0.125	0	0.216	0.084
Bm236601	1.055	1.887	1.582	0	0	0	0	0.491	0.2
Bm194898	0	0	0	0	0.113	0.373	0.575	0.354	0.114
Bm176691	0	0	0	0.178	0.885	0.39	0	0.185	0.538
Bm121108	0	0	0.737	0	0	1.485	0	2.405	1.1
Bm137121	0	0	0	0	0.399	0	0	0.149	0
Bm068127	0.001	0.762	1.704	0	0	0	0	0	0.377
Bm327497	17.708	8.717	16.56	26.509	43.568	21.43	13.172	10.102	17.583
Bm324917	3.532	6.939	3.533	2.518	2.425	2.121	3.066	4.007	2.547
Bm166281	0	0.709	0.288	0	0	0	0	0.144	0
Bm243163	0.712	0	0.984	0	0.29	0.399	0	0.151	0.22
Bm230783	0	0	0	0	0	0	0.263	0	0
Bm179166	0	0	0	0.744	0.742	0.327	0	0.155	0.602
Bm018598	0	0	0	0.386	0.962	0.424	4.307	0.804	0.39
Bm243680	0	2.951	0	0	0	0	0	0	0
Bm225964	0	0	0	0.156	0.207	0.057	1.267	0.379	0.473
Bm301128	0	0	0	0	0.467	0	0	0	0
Bm311515	9.796	0.33	8.141	7.815	4.588	9.344	7.757	6.816	5.654
Bm176212	0	0.143	0	6.14	0	0	3.823	0	0
Bm080058	5.281	2.881	3.27	0	0	0	0	0	0
Bm227413	0.338	0.581	0.863	0	0	0.035	0	1.637	0.993
Bm239266	0	0.112	0.114	0	0	0	0.444	0	0.221
Bm114433	0.58	0.729	0.246	0.946	0.707	0	0	0.493	0.239
Bm221597	0.454	0.152	0.386	0	0	0	0	0.617	0.374
Bm011258	7.794	8.301	7.316	8.143	7.348	7.805	9.231	7.71	9.82
Bm183145	0.141	0.354	0.12	0	0	0	0.292	0.12	0.348
Bm215401	0	0	0	30.688	0	0	47.577	0	0
Bm222081	0.061	0	1.138	0	0.294	0	0	0	0
Bm153324	2.091	1.379	2.452	1.106	1.441	1.246	2.573	1.41	1.498
Bm315707	2.737	1.263	3.828	4.007	2.629	2.46	3.131	1.842	2.815
Bm043682	0	0	0	0	0.222	0	0.23	0	0
Bm198918	32.807	30.391	31.39	114.345	100.066	102.112	108.396	117.47	103.62
Bm245244	0	0	0	0.12	0	0.262	0.849	0.498	0.362
Bm038105	0	0	0	0.782	0	0	0	0.373	0.114
Bm227694	0	0	0	0.667	1.412	1.556	3.889	2.691	1.179
Bm044180	1.964	0.297	1.242	2.32	3.113	1.191	1.606	3.81	2.785
Bm221239	0	0	0	0.562	0.56	0	0	0	0
Bm274940	0	0	0	0.565	0	0	0	0.118	0.571
Bm018524	0	0	0	0.287	1.348	1.366	0.214	0.267	0.243
Bm212468	0.334	0.792	0.433	0.818	0	1.49	1.599	1.009	1.12
Bm075056	0	0	0	0.357	0.178	0.588	0	0	0.18
Bm098045	0.495	1.244	0.842	0	0	0	0	0.21	0
Bm140313	20.372	10.463	21.141	113.809	129.821	130.879	91.564	118.395	93.976
Bm102128	0	0	0	0.441	1.099	0.403	0	0	0
Bm095039	0.56	0.703	0	0	0.114	0.251	0.348	0.238	0.692
Bm039829	0.312	0	0	0	0	0	0	0.795	0
Bm205841	0.14	0	0	0.115	0.114	0.629	0	0.119	0
Bm058408	0.322	0.557	0.203	0	0.064	0.141	0.066	0	0.196
Bm260289	1.131	0	0.549	0	0	0	0	0	0
Bm131777	0	0	0	0	0.158	0.174	0.483	0.331	0
Bm302666	0	0	0	0	0	0	0.392	0	0
Bm313670	0	0	0.24	0.475	0	0.124	0.147	0.127	0
Bm059549	1.092	1.937	1.393	0.526	0.225	0.665	0.944	1.314	1.221
Bm205105	1.33	1.469	1.166	0.527	0.345	0	0.187	0.48	0.473
Bm160691	0.291	0	0.124	0.119	0.355	0	0	0.124	0
Bm137985	2.094	2.176	1.813	1.802	2.113	1.696	1.522	1.573	2.14
Bm298280	0	0	0.158	0	0	0.333	0.154	0.158	0.306
Bm133874	0.558	0.409	0.474	0.228	0.113	0.187	0.115	0.059	0.173
Bm136341	2.68	9.746	2.744	52.928	46.854	47.422	19.212	12.993	19.788
Bm060258	3.476	1.383	2.054	3.762	3.548	5.571	4.742	6.111	3.624
Bm217520	1.95	4.325	1.707	0.281	0.56	0	0.475	0.195	0.284
Bm234972	4.794	4.717	4.482	1.315	1.424	0.915	1.889	1.886	1.311
Bm282440	0	0	0.18	0	0	0.155	0	0	0.313
Bm176947	0	0.466	0	0.151	0	0	0.46	0	0
Bm222857	0.513	0.043	0.654	0	0	0	0	0.523	0.677
Bm076120	0	0.169	0	0	0.339	0	0.137	0	0.136
Bm067296	0	0	0	0.001	0.916	0	0	0	0
Bm312959	0	0.316	0.641	0	0	0	0	0	0
Bm226681	0	0	0	0.542	0.27	0	0	0.282	0
Bm071161	0.081	0.088	0.45	0	0.427	0	0.236	0.416	0
Bm251265	0.46	1.06	0	1.63	1.921	1.994	2.388	1.722	1.184
Bm290360	1.188	0.355	1.442	0.415	1.311	1.216	0.632	0.937	0.7
Bm206235	0	0	0	0.362	0	0.164	0.258	0	0
Bm241948	1.157	0.565	1.155	0.641	0.284	0.86	0.349	0.593	0.36
Bm256608	0	0	0	0	0.13	0.143	0.793	0	0
Bm096645	1.537	0.715	1.306	0.657	0.536	0.459	0.121	0.498	0.241
Bm004722	0	1.043	0	0	0	0	0	0	0
Bm281958	2.081	1.942	1.694	1.406	1.632	1.958	0.776	1.43	0.663
Bm239979	6.305	4.087	7.283	4.111	5.891	3.699	3.663	5.469	4.695
Bm003449	0.749	0	0.852	0	0	0	0	0	0
Bm238518	0.703	1.766	0	1.147	0.286	1.259	0.582	0.597	1.738
Bm215373	0	0	0	0.573	0.286	0	0	0.299	0.29
Bm265248	2.438	1.949	1.668	1.302	1.568	1.28	1.075	1.501	0.927
Bm146659	28.834	27.836	26.333	18.836	23.222	13.553	18.801	17.148	20.8
Bm106042	1.378	0	1.611	0	0.21	0.694	0	0.732	0.568
Bm217538	0	0.102	0	0	0	0	0	0	0.52
Bm295729	0.508	0	0.086	0.166	0.66	0.273	0.672	0.518	0.502
Bm213184	0.483	0.392	0.101	0.294	0.135	0	0.249	0.337	0
Bm290344	1.263	1.229	2.066	2.624	1.058	2.427	2.106	1.281	1.972
Bm019848	66.297	103.863	67.099	15.022	14.122	14.862	26.132	26.334	28.294
Bm239399	0.512	0.379	0.531	0	0	0	0	0	0
Bm053560	0	0	0	0	0.216	0.476	0	0.226	0.219
Bm183784	17.061	18.516	14.648	5.524	8.981	6.732	5.723	6.091	6.807
Bm022125	0	0	0	0.385	0.673	0.308	0.23	0.036	0.071
Bm170294	5.386	7.541	7.494	5.031	4.224	6.21	3.713	5.119	4.107
Bm169367	0	0	0	1.188	0	0	0	0	0
Bm090530	0	0	0	8.518	0	0	0	0	0
Bm186850	0	0.554	0.187	0	0	0	0	0	0.364
Bm119433	0.29	0.486	0.493	0	0.118	0	0	0	0
Bm118939	0.383	0.963	0.977	5.314	5.607	4.119	2.537	5.535	2.843
Bm125598	0.437	0.122	0.867	0	0	0	0	0	0
Bm152039	0.418	0.525	0.178	0	0	0	0	0	0
Bm035637	1.793	1.885	3.791	0	0.505	0	0.398	0.55	0.77
Bm150744	1.54	2.111	1.937	1.859	0.279	0.845	1.948	0.814	1.18
Bm025005	1.381	2.282	1.388	0.147	0.312	0.206	0.344	0.536	0.392
Bm262059	0	0	0	0	1.11	0.524	0.323	0	0.161
Bm107941	0	0	0	1.771	0.252	0.556	0.77	0.527	0.256
Bm237016	0.365	0.535	0.082	0.518	0.161	0.245	0.613	0.404	0.601
Bm138015	0.806	0	0.857	0	0	0	0	1.199	0.831
Bm102564	0.888	3.229	0.635	10.246	15.922	10.663	6.251	4.728	8.173
Bm124210	0.612	0.513	0.173	0	0	0	0.338	0	0
Bm271355	0.632	1.051	1.236	1.396	0.539	1.195	1.039	1.746	0.941
Bm311371	0.591	0	0.54	0	0	0	0	0.297	0.371
Bm042354	8.134	7.929	8.903	4.179	4.892	4.185	3.38	3.497	4.476
Bm225265	4.655	3.659	3.241	6.252	5.414	5.177	4.489	5.184	3.904
Bm124491	0.313	0	0	0	0	0.199	0	0	0.53
Bm030620	0	0	0	0.142	1.275	0.156	0.577	0.148	0.287
Bm219724	0	0	0.239	0	0	0	0	0	0
Bm010212	0.303	0.168	0.377	0.873	0.355	0.663	0	0.35	0.224
Bm160556	0	0	0	0.411	0.205	0.225	0.208	0	0.519
Bm245287	0.555	0.181	0.641	0.029	0	0.032	0	0.89	0.547
Bm180963	9.516	9.449	9.258	6.681	5.283	3.645	5.579	3.907	4.39
Bm291884	0.474	0.452	0.179	0	0.111	0.244	0.099	0.141	0.223
Bm292651	0	0	0	1.35	1.57	0.247	0.685	1.875	0.455
Bm134171	0	0	0	0.176	0.395	0.387	1.117	0.138	0.089
Bm083712	0	1.822	0	0	0	0	0	0	0
Bm161166	0	0	0	0	0	0.334	0	0	0
Bm114271	0.84	0.252	0.487	0	0	0	0	0	0.964
Bm224640	0.154	0	0	0.251	0.876	0.276	0	0.262	0
Bm239315	0.139	0.117	0	0.249	0	0.236	0.582	0	0.115
Bm001860	0	0	0	0	0	0	0	0.228	0.443
Bm127466	0.488	0.273	0.138	0	0	0	0	0	0.671
Bm167738	1.552	2.444	1.108	1.266	0.656	1.001	1.285	0.95	1.126
Bm115866	0	0	0	0	0.421	0.696	0.429	0	0
Bm333083	1.824	4.505	1.885	0.16	0.075	0.303	0.285	0.572	0.438
Bm097358	0	0	0	0	0	0	0	0.463	0.449
Bm266169	0	0.478	0.121	0	0.464	0.128	0	0	0.118
Bm320617	1.072	0.619	1.168	0.766	0.33	1.637	1.536	0.8	0.659
Bm076379	0.484	0.167	0	3.732	0.472	2.63	0	2.008	0.518
Bm308865	0.181	0	0.051	9.429	11.067	6.429	8.232	1.838	2.08
Bm060160	0.219	1.1	0.186	0	0	0	0	0	0
Bm216778	0	0	0	0	0	0	0.459	0.314	0.305
Bm154528	0	0.896	0	0.349	0	0	0.796	0	0
Bm289118	4.611	4.858	3.897	1.951	2.227	2.043	3.051	3.59	3.048
Bm101947	4.404	2.077	2.605	2.204	2.127	1.833	2.412	3.923	3.213
Bm280142	0	0	0	0.234	1.308	0.669	0.666	0	0.047
Bm043929	0.99	0.968	0.701	0	0	0	0	0	0
Bm188283	0	0	0	0.472	0.314	0.346	0.239	0.492	0.398
Bm203328	5.23	8.905	5.602	6.259	6.501	6.155	6.097	7.228	5.466
Bm191935	0	0	0	0.319	0.318	0.175	0.486	0.166	0.645
Bm227954	0.669	0.28	0.427	0	0.408	0.15	0.277	0.142	0
Bm278034	0.575	0.441	0.738	1.211	1.094	1.212	0.717	0.804	1.022
Bm083022	0.979	1.58	1.53	1.232	0.629	0.526	1.424	0.961	0.778
Bm095268	0	0	0	0.39	0.647	0.713	0.329	0.203	0.262
Bm097397	0.295	0.704	0.318	0.241	0.684	0	0.366	0.627	0.243
Bm006416	0	0	0	1.445	0	0	0	0	0
Bm221345	0	0.2	0.411	0	0	0	0.441	0	0
Bm075800	1.232	0.356	1.776	3.172	4.429	1.999	2.065	3.392	2.547
Bm051388	0.195	0.326	1.985	0.318	0.317	0.523	0	0.662	0.481
Bm024957	0	0.654	0.166	0	0	0	0	0	0
Bm327765	0	0	0	0.026	0	0.072	0	0	0.714
Bm264937	0	0	0	0.158	0	0.174	0.161	0.825	0
Bm286078	0	0	0.134	0	0	0	0	0	0
Bm164218	0.686	1.055	1.279	0.741	0.431	0.277	0	0.389	0.673
Bm095677	0	1.697	0	0	0	0	0	0	0
Bm086998	0	0	0	0	0.48	0.529	0.488	0	0
Bm252743	4.035	1.807	1.774	201.677	223.279	235.727	156.771	114.641	123.56
Bm307191	0.143	0.299	0.182	0.349	0.406	0.511	1.063	0.606	0.941
Bm174888	0.515	0.539	0.547	0.21	0	0	0.107	0.219	0
Bm094479	0	0	0	1.37	1.061	0.886	0.379	0.442	0.328
Bm226586	0	0	0	0.415	1.149	0.456	1.275	0	0.06
Bm097098	15.642	17.362	15.125	36.056	29.096	31.182	19.101	23.763	23.055
Bm112582	0	0	0	0	0.398	0.219	0.81	0	0
Bm251708	0	0.858	0	0	0	0	0	0.29	0
Bm254950	0	0	0	0.552	0.275	0.303	0	0	0.139
Bm258009	0.205	2.061	0.697	0.502	0	0.184	0.17	0.174	0.338
Bm137832	0	0	0	0.171	0.341	0.376	0	0.356	0.864
Bm021581	10.155	12.178	10.905	6.725	2.711	3.813	8.622	2.805	4.504
Bm136254	0.199	0.668	0.169	0	0	0	0	0	0
Bm328169	0.39	0	0	0	0	0	0	0	0
Bm206317	6.629	3.042	6.65	9.002	8.191	8.344	7.423	8.966	8.798
Bm188901	0.225	0.063	0.191	0	0	0	0.062	0.255	0.432
Bm024304	0.069	0	0	0.28	0.378	0.337	0	0.117	0.057
Bm152568	0.18	0.542	0.458	0.587	0.292	0.581	0.595	0.153	0
Bm038162	4.616	5.78	5	3.065	3.056	2.64	2.984	2.585	3.1
Bm103786	0.402	0	0.342	0	0	0.901	0	0	0
Bm148107	2.425	0.878	1.783	0	0.16	0	0.054	2.785	1.999
Bm051246	0.337	0.213	0	0	0.081	0.2	0	0	0.164
Bm018863	6.626	22.822	5.632	4.005	4.44	4.947	5.282	9.02	7.487
Bm196504	0.882	0.633	0.535	0	0	0	0	0	0
Bm126423	0	0	0	0.29	0	0.139	0	0.302	0.058
Bm007341	1.748	2.389	0.955	0	0.567	0.447	0.24	1.419	0.479
Bm305287	0	0	0	0	0.166	0	0.507	0.173	0
Bm298288	0	0	0	0.567	0.565	0.735	1.045	0.215	0.156
Bm097262	0	0	0.045	1.98	1.844	0.52	0.83	1.121	1.609
Bm112303	0	0	0.551	1.763	1.499	1.084	1.301	1.469	0.298
Bm331499	1.6	1.564	1.36	0.544	0.976	0.358	1.104	0.453	0.55
Bm018226	1.684	1.411	1.432	0.5	1.494	0.686	2.281	1.301	2.525
Bm146526	0.709	0.396	1.206	1.158	1.923	1.059	0.979	0.804	0.975
Bm105404	0	0	0	0	0.461	0.508	0	0	0
Bm270494	0	0.645	0	0.419	0	0	0.478	0	0
Bm179848	0	0.872	0	0	0	0	0	0.295	0
Bm155012	0.744	0.156	0	0	0	0	0	0.87	0.46
Bm120487	5.093	5.697	5.785	8.333	9.323	8.551	9.728	13.168	13.543
Bm030562	0	0	0	0.216	0.43	0	0	0.225	0
Bm324419	3.9	1.37	3.422	4.619	4.706	2.592	2.083	1.711	1.452
Bm273433	0.151	0.195	0.085	0.268	0.23	0.135	0.249	0.32	0.402
Bm045160	0.43	1.202	0.61	0.117	0	0	0	0.244	0.118
Bm320019	0	0.423	0	0	0	0.151	0.139	0	0.278
Bm085115	1.743	2.608	2.752	0.813	0.607	0.335	1.134	1.058	0.924
Bm214720	0.133	0.785	0.596	0.135	0.306	0	0	0.279	0.221
Bm056253	0	0.044	0.042	1.966	1.818	1.941	3.178	2.267	1.701
Bm048249	2.5	1.794	4.15	0.64	0.463	0.43	1.705	1.064	0.6
Bm091614	0	0	0.23	0	0.22	0.242	0	0	0
Bm250922	1.129	0.63	0.64	0.307	0.306	0.506	0.156	0	0.465
Bm180828	0	1.136	0	0	0	0	0	0	0
Bm137163	0	0	0	0.518	0.784	0.728	0.926	0.173	0.251
Bm080692	0	0	0.182	0.175	0.174	0.192	0	0.182	0.353
Bm069805	0	0	1.149	0	0	0	0	0.373	0.204
Bm156820	2.363	0.054	2.697	6.041	4.255	2.784	2.345	5.882	2.605
Bm130899	1.083	3.151	1.528	2.369	1.448	1.832	1.469	1.386	1.365
Bm215893	0.277	0	0.248	0	0	0	0	1.555	0.031
Bm167241	0	0	0.039	1.274	1.731	1.491	3.33	1.174	1.087
Bm302264	0.37	0	0.052	0.956	1.956	0.829	0.613	0.524	1.017
Bm320243	0.416	0.349	0	0	0	0	0	0	0
Bm229043	0.461	0	0	0.251	1.374	0.551	4.071	1.436	1.394
Bm027399	0	0	0	0	0	0	0	0	0.32
Bm273298	0	0.558	0	0	0	0	0	0	0
Bm161722	18.978	20.374	23.92	26.333	24.052	26.924	25.483	23.753	25.361
Bm256897	0.366	0	0.622	0	0.446	0	0	0	0
Bm150892	0.643	0	0.875	0	0.523	0.231	0	0.547	0.424
Bm229543	0	0	0	0.423	0	0	0	0.66	0
Bm021474	17.233	17.125	16.374	12.993	14.76	13.18	14.685	14.214	15.799
Bm071439	0	0	0	2.152	0	0	0	0	0
Bm024337	0	0	0	0	0.571	0.21	0.194	0.199	0.193
Bm251314	0	0.213	0.258	0	0.146	0	0.054	0	0.099
Bm012103	0.365	0	0	1.441	0	0	0	0.31	0
Bm210517	0	0	0.355	0	0	0	0	0.355	0.689
Bm178845	2.056	2.131	1.324	0.651	1.119	0.993	0.734	1.843	0.626
Bm214434	0.779	1.53	0	0.403	0.212	0	0.239	0.391	0.133
Bm011192	0	0	0	0	0.303	0.334	0.154	0	0.154
Bm094853	0	0.211	0.857	0	0.41	0	0.209	0	0
Bm191442	0	0	0.145	0	0	0.152	0	0.144	0
Bm002740	0.295	0.282	0	0.195	0	0	0	0	0
Bm052722	0	0	0	0	0	0	0	0.507	0
Bm075066	15.795	8.469	18.082	43.132	45.04	38.493	33.302	21.479	42.373
Bm057575	0	0	0	0.821	1.007	1.384	1.246	1.053	0.817
Bm322883	0	0	0	0	0.211	0	0.86	0.883	0.214
Bm112893	2318.372	1042.873	2278.575	160.447	215.37	165.094	281.992	200.854	337.232
Bm321952	0	0.761	0	0	0	0	0	0	0
Bm138819	0	0	0	0.325	0	0	0.439	0	0
Bm158123	0.615	0	1.22	0	0.083	0.184	0	0.261	0.085
Bm227105	0.182	0.155	0.643	0	0	0	0	0.497	0.123
Bm046151	0	0.404	0	0.655	0	0	0.798	0	0
Bm272471	0	0.466	0	0	0	0	0	0	0
Bm262240	0	0	0	0.171	0.34	0	0	0	0
Bm240173	2.424	4.431	2.015	1.385	2.633	2.673	2.481	2.958	2.288
Bm333783	0	1.959	0.398	0	0.19	0	0	0.199	0
Bm084196	1.108	1.529	0.165	0	0	0.076	0.35	0.169	0
Bm333375	0.315	0.132	0.536	0	0	0	0	0	0
Bm156858	0	0.199	0	0	0	0	0.196	0	0
Bm281002	0.286	2.31	0.896	0.166	0	0.239	0.154	0.268	0.092
Bm061075	0.568	0.635	0	0	0	0	0	0	0
Bm326467	0.353	0	0.45	0	0.574	0	0	0	0
Bm301060	2.363	0	1.674	0	0	0	0	0	0
Bm157926	15.264	13.085	16.898	18.392	15.299	17.493	9.257	9.654	8.489
Bm251353	0.987	1.819	0.671	3.221	1.765	1.238	0.654	0.671	0.976
Bm133072	2.96	1.996	1.646	1.972	1.124	2.427	2.229	3.029	1.639
Bm052001	3.698	0.996	2.695	0.108	0	0	0	2.806	3.594
Bm031337	0	0.03	0	0.151	0	0.326	0.232	0.488	0
Bm307780	1.326	2.645	1.739	1.027	0.962	0.325	1.203	1.666	1.841
Bm322277	0	0	0	0.263	0.262	0.433	0	0.137	0
Bm216071	14.441	11.054	14.442	12.846	14.598	16.693	12.237	13.813	13.962
Bm097669	1.383	0.348	3.293	0.113	0	0	0	0.118	0.913
Bm055219	0	0	0	2.868	2.624	0.657	3.146	4.871	3.674
Bm134428	0	0	0	0.109	0.545	0.84	0.776	0.797	1.105
Bm000402	1.072	2.693	1.458	0.35	0	0	0.355	0.182	0
Bm136437	0	0	0	0.924	0.092	0.304	0.187	0.481	0.28
Bm068344	0	0.213	0.325	0.312	0.207	0.228	0.316	0.108	0.105
Bm168377	2.13	0.156	1.096	0	0	0	0	0.861	0.67
Bm248479	0.9	1.753	1.681	0.222	0.401	0.458	0.344	0.831	0.211
Bm210037	0	0	0	0	0.131	0	0	0	0.099
Bm253143	0	0	0.348	0	0	0.183	0.169	0	0.675
Bm127149	0.45	0.302	0	0.059	0.074	0.086	0	0	0
Bm192972	0.522	1.808	0.553	0.054	0.227	0.164	0.528	0.311	0.428
Bm209113	0.91	0.508	0.258	0.371	0	0.272	0.126	0.903	0.375
Bm057163	0.413	0.173	0	0	0.336	0.185	0	0	0.511
Bm027093	0	0	0.316	0	0	0	0	0.28	0.469
Bm311237	0	0	0.306	0	0.293	0	0	0.306	0.297
Bm069725	0.155	0.389	0.789	0	0	0	0	0	0
Bm306814	0.745	1.709	1.273	2.745	3.421	2.352	2.955	3.14	1.948
Bm107126	0.576	0.106	0.253	1.377	1.29	1.395	1.887	3.373	1.733
Bm334452	0	0	0	0.001	0	0	0.332	0.002	0
Bm051158	0	0	0	164.103	165.936	166.19	15.308	19.34	15.587
Bm167295	0	0	0	1.671	0	0	0	0	0
Bm008081	0.324	0.204	0.965	0	0.33	0	0	0	0
Bm100725	0.566	0.281	0.692	0	0.332	0	0.61	0.147	0
Bm149346	0.415	0.373	0	0	0.428	0	0	0.196	0
Bm005021	0	0.232	0	0.301	0.674	0.413	0.076	0.235	0.076
Bm328824	0.572	0	0	0	0	0	0	0	0
Bm103677	1.112	0	1.527	0	0.278	0	0	0	0
Bm181480	0	0	0.212	0.611	0	0	0	0	0.412
Bm161633	1.325	0.74	1.001	0	0.12	0	0.366	1.627	0.607
Bm308576	0.452	0	0	0.368	0.367	0.202	0.374	0.192	0.745
Bm241108	1.279	1.071	0.87	0.626	1.248	0.458	0.424	0.435	0.633
Bm194265	0.241	0.804	0.629	0.306	0.496	0.348	0.233	0.475	0.263
Bm203812	0.209	0	0	0	0	0.15	0	0	0.034
Bm049116	0	0	0	0	6.916	6.754	0	5.093	7.332
Bm302748	0	0.231	0.235	0	0	0	0.114	0	0.342
Bm206786	0	0	0	0	0	1.611	0	0	0
Bm089411	0.315	0	0.535	0.514	0.384	0.282	0.261	0.134	0.26
Bm052203	0.305	0	0.259	0	0	0	0	0.906	0.126
Bm097356	0.169	0	0	0.138	0.137	0.076	0	0.072	0
Bm261185	0	0	0	0.453	0	0.83	0.153	0	0
Bm019126	0	0	0	0	0	0	0.166	0	0
Bm302812	0.853	3.656	0.25	0.267	0.119	0.127	0.247	0.724	0.109
Bm208255	1.212	0.813	1.911	1.679	2.127	1.752	1.087	0.638	3.253
Bm102271	0	0.212	0.192	0	0.092	0	0.28	0	0.186
Bm332498	5.816	4.846	5.969	2.203	3.172	1.641	4.343	3.504	5.168
Bm225018	0	0	0	0.296	0.395	0.223	0.6	1.001	0.974
Bm270811	4.507	2.32	2.124	5.979	7.847	6.262	3.925	4.405	11.22
Bm040328	16.116	14.888	15.179	0.303	0	0.13	6.733	4.567	5.388
Bm207309	0	0	0	0	0	0	0.342	0	0
Bm053830	0	0	0	0.802	0.389	0.17	0.726	0.432	0.289
Bm304708	10.015	16.445	10.671	1.416	0.923	1.316	2.101	2.724	1.982
Bm036828	0.213	1.608	0	0	0.173	0	0.883	1.087	0.703
Bm012670	0	0	0	0	0	0	0.253	0	0
Bm042054	0	0	0	0.135	0.336	0.37	0.137	0.211	0.409
Bm047982	0	0	1.228	0	0	0	0	0	0
Bm200100	0	0.427	0	0	0	0	0	0	0
Bm264934	0.146	0.369	0.271	0	0.106	0	0	0	0.115
Bm167695	1.8	0	0.458	0	0.893	0	0	1.294	1.051
Bm058578	28.789	27.404	25.748	32.204	27.971	31.323	61.276	42.282	83.722
Bm150133	1.288	4.488	0.392	1.338	0.397	0	0.634	0.541	0
Bm072004	1.463	0.32	1.145	4.558	3.5	3.478	4.634	3.205	2.854
Bm290794	0	0.152	0	0.444	0	0	0.301	0	0
Bm205945	0.351	0.228	0.157	0	0	0	0.039	0	0
Bm236530	1.842	0.141	0.129	0	0	0	0	0.619	0
Bm084102	0.787	0.521	1.49	0.716	1.209	1.556	1.171	0.934	0.47
Bm095849	0.121	0	0	0	0	0.083	0	0	0
Bm300932	0	0	0	1.016	0.513	0.71	0.884	1.21	0.261
Bm086930	0.116	0	0	0.379	0.189	0.208	0.096	0.099	0.096
Bm057307	0	0	0.047	0.226	0.181	0.846	0.046	0.047	0.092
Bm040039	0.638	0	0.271	0	0	0	0	0.136	0
Bm152057	0	0	0	0.768	0	0	0.519	0	0
Bm002072	0	0	0	0.351	0.53	0.327	0.17	0	0
Bm025508	0	0	0.49	0	0	0	0	0.326	0
Bm066024	53.781	34.781	54.636	6.39	3.845	3.707	3.547	3.265	4.021
Bm327701	0	0	0	0.403	0.819	0.334	0.182	0	0
Bm291432	0	0	0	0.48	0	0	0	0	0
Bm164848	0.546	0.458	0.464	0	0	0.122	0	0.116	0
Bm209527	1.431	0.786	2.935	2.484	2.921	2.857	2.473	3.537	1.593
Bm271453	0	0	0	0.192	1.534	0	0.586	0	0
Bm014724	0.27	0.226	0.153	0.66	0	0.081	0.223	0.153	0.074
Bm197783	0.478	0.4	0.203	0	0.097	0	0	0	0
Bm030282	0.572	0.479	0.648	0	0	0	0	0	0
Bm234568	5.237	4.502	5.318	2.545	3.339	1.841	3.744	5.006	3.748
Bm286578	0	0.974	0	0	0	0	0	0	0
Bm314392	0	1.231	0.45	0	0.238	0	0.248	0	0
Bm139211	0	0.155	0	0.855	0.757	0.656	0.684	0.481	0.456
Bm321778	0.799	0	0.679	0.326	0.325	0.716	0.992	0	0.329
Bm166221	1.595	1.182	1.053	0.389	0.778	0.678	0.327	0.674	0.998
Bm198210	0	0	0.077	0.147	0.441	0.162	0	0.077	0.075
Bm184576	0	0	0	0	0	0	0.459	0.267	0.107
Bm183896	0.169	0	0.144	0.244	0	0.53	0	0	0.836
Bm062850	5.561	7.963	5.059	0.185	0.369	0.61	0.376	0.096	0.561
Bm059475	1.037	0.145	0.881	3.243	1.264	0.929	0.715	0.441	0.712
Bm134308	2.119	2.541	1.521	0	0.286	0.188	0.54	0.338	0.182
Bm237831	0	0	0	0.755	0.564	1.969	1.149	0.59	0.572
Bm136337	0.422	0.923	0	0.266	0	0.104	0	0.532	0.375
Bm057029	0.115	0.105	0	0	0.226	0	0.077	0	0
Bm208966	0	0	0	0.543	0	0	0.708	0	0
Bm000550	1.583	0.311	1.353	0.249	0.237	0	0.372	0.141	0.347
Bm156685	0.229	1.299	1.629	0.05	0	0.301	0.444	0.4	0.14
Bm105612	0	0	0.168	0.097	0.286	0	0	0.071	0
Bm300337	0.408	0.196	0	0	0	0	0	1.528	0.447
Bm204665	1.518	1.445	2.382	1.552	1.058	1.06	1.307	1.77	0.941
Bm310956	1.264	0.066	2.081	0	0	0	0	0	0
Bm326290	3.175	1.182	5.098	7.772	4.59	6.005	3.797	5.097	4.363
Bm000710	0.218	0.183	0	0	0.532	0	0	0.185	0
Bm188571	0	0.672	0	0.847	0	0	0.586	0	0
Bm325852	0	0	0	0.449	0.112	0.369	0.228	0.701	0.85
Bm261646	0.15	0	0	0.051	0.14	0.019	0	0.768	0
Bm276434	0	0	0	2.134	0	0	2.363	0	0
Bm179186	0	0	0	0.164	0	0.181	0.501	0	0.166
Bm022109	0	1.935	0	0	0	0	0	0	0
Bm005064	0.897	0	0.381	0	0	0	0	0.381	0.987
Bm292232	0.952	0.403	1.149	0	0	0	0	1.072	0.764
Bm105025	0	0	0	0	0	0	0	0.207	0.401
Bm026033	1.362	1.812	1.167	0.87	0.357	0	0.488	0	1.004
Bm151842	1.913	1.603	1.626	0.781	0.194	0.429	0.594	0.203	0.394
Bm328597	0	0	0	0.276	0.412	0	0	0	0
Bm290238	29.462	35.76	28.595	3.767	2.747	3.944	4.953	6.809	5.678
Bm022779	0.22	0	0.561	0	0	0.394	0	0	0.181
Bm103345	0.489	0.205	0.701	0.092	0.25	0.355	0.087	0.187	0.275
Bm085344	0.543	0	0.154	0	0.074	0	0	0.154	0
Bm239589	2.834	2.599	2.438	1.053	0.239	0	0	0	0.157
Bm226448	1.253	0.497	1.645	0.022	0.045	0.025	0	0.975	1.321
Bm280962	0	3.839	0	0	0	0	0	0	0
Bm068095	0	0.318	0.274	0.189	0.209	0.63	0.92	0.405	0.477
Bm200459	0.397	0	0	0	0	0.178	0	0.169	0
Bm095154	0.706	1.495	0.639	0.42	0	0.174	0.404	0	0.515
Bm297577	0	0	0	0.202	0.268	0.148	0.478	0.56	0.612
Bm223152	0	0	0	0.735	2.197	1.524	2.817	0.425	0.908
Bm035115	0	0	0.127	0	0.122	0.269	0	0.764	0.124
Bm150676	0.717	0	0.271	0.781	0.583	0.214	0.528	1.897	3.09
Bm193987	0	0.536	0.217	0.209	0	0	0	0	0
Bm130903	0	0	0	6.405	1.216	0.502	2.94	3.177	0.308
Bm304651	0.885	0.2	0.772	0.958	1.054	1.272	0.963	1.582	1.251
Bm027767	0	0	0	0.568	0.566	0.416	0.576	0.296	0
Bm161807	0.207	1.175	0.555	0.521	0.14	0.321	1.055	0.349	0.194
Bm171444	0	1.077	0	0	0	0	0	0	0
Bm025154	0.151	0	0	0	0	0	0.125	0.641	0.124
Bm186221	0.54	7.733	0.986	0.328	0.316	0.475	0.715	0.298	0.465
Bm107689	0	0	0	0.512	0.382	0	0.519	0	0.388
Bm283740	0	0.806	0	0.523	0	0	1.394	0	0
Bm178237	0	0	0	0.549	0.137	0	0.557	0	0.555
Bm311318	0	0	0	0.242	1.085	1.262	0.307	0.378	0.183
Bm151438	6.666	7.311	7.068	3.589	5.141	4.125	4.438	6.074	6.063
Bm269588	0	0	0	0.082	0.082	0.359	0.498	0.426	0.331
Bm067138	9.898	8.645	8.772	6.702	7.021	5.283	6.626	4.654	7.988
Bm319868	0	0	0	0	0	0.217	0	0	0
Bm103972	0	0	0	0.429	0.285	0	0	0.149	0.145
Bm021826	0.279	0.227	0	0.223	1.337	0.732	0.909	0.467	0
Bm001226	0.581	0.169	1.472	0.043	0.043	0	0	0.677	0.409
Bm328777	0	0	0	0.206	0.719	0.226	0.209	0	0
Bm266150	0	0	0	0.37	0	0	0.188	0	0
Bm235321	0.779	2.148	1.331	0.728	0.581	0.644	1.31	3.307	2.063
Bm092639	0	0.33	0	0.482	0	0	1.467	0	0
Bm180765	0	0	0	0.498	0.941	0.652	0.5	0.396	0.36
Bm296004	0	0	0	0.172	1.798	0.566	1.221	0.268	0.434
Bm082109	1.877	0.374	1.824	0	0.073	0	0	0	0
Bm323277	0.595	6.378	1.706	0	0	0.188	0.717	0.795	0
Bm156173	0	0	0	0.593	1.182	0.592	1.587	0.955	0.981
Bm003989	0.631	0	0.06	4.231	9.282	6.295	1.326	4.401	3.097
Bm205031	0.988	0.495	0.416	0	0.186	0.102	0.189	0.194	0
Bm086451	0	0	0	0.168	0.335	0	0	0	0
Bm094967	0	0.127	0.287	0	0.091	0.101	0.093	0.096	0.093
Bm016089	64.323	44.882	62.27	17.54	13.446	10.223	36.141	48.766	49.495
Bm173225	0.127	0.213	0.324	0.207	0.207	0	0	0	0.105
Bm085445	0	0	0	0.696	0	0	1.059	0	0
Bm027808	1.716	3.74	1.298	0.894	0.72	0.832	1.152	1.616	1.036
Bm248770	0.463	0.097	0.59	1.098	2.822	1.036	1.149	1.67	0.858
Bm004851	0	0	0.153	0.025	0	0	0	0.157	0.264
Bm090118	0	0	0	0	0.714	0	0.273	0.093	0.181
Bm319312	0	0.387	0.473	0.131	0.123	0	0.24	0.127	0.595
Bm118537	0	0	0	0	0.617	0	0	0.831	0.425
Bm318643	0.348	0	0.592	0	0	0	0	0.296	0
Bm280083	0	0.481	0	0.823	0.272	0.308	0	0	0
Bm336659	0	0	0.282	0	0.405	0.297	0.275	0.282	0.137
Bm305737	0.317	0.382	0.983	0.396	0.673	0.159	0.328	0.822	0.638
Bm277868	0	0.17	1.311	0	0	0.312	0	0	0
Bm074915	0	0	0	0.096	0	0.198	0.121	0	0
Bm096733	0	0.355	0	0	0.459	0.591	0	0.222	0
Bm006068	0.304	0.29	0.569	0	0	0	0	0	0
Bm183893	0.272	0.532	0.046	0	0	0	0	0.095	0.04
Bm013266	0	0	0	0.222	0	0	0	0	0
Bm306849	0.275	0.921	0	0	0	0.246	0.455	0.234	0
Bm026745	0	0.288	0	0	0	0	0.285	0	0
Bm185486	0	0.206	0.209	0	0.2	0	0	0	0
Bm017820	0	0	0.513	0.616	0	0	0	0	0.249
Bm169348	25.495	37.477	19.091	135.286	103.628	120.365	110.988	54.96	79.918
Bm321992	30.977	5.668	31.248	72.38	84.063	49.572	75.652	92.053	98.533
Bm129895	0.411	0	0.175	0	0.167	0	0	0.175	0.169
Bm122821	0	0	0	0	0.18	0	0.183	0.376	0.182
Bm026976	0	0	0	0.476	0.237	1.044	0.362	0	0.24
Bm080207	3.144	6.439	2.873	1.019	0.505	0.604	1.395	0.45	1.465
Bm289197	0	0	0	0	0.384	0	0	0	0
Bm131588	0.539	0	0.083	0	0	0	0.052	0.584	0.384
Bm147423	0	0	0	0.565	0.141	0.31	0	0.294	0.571
Bm260651	0	0	0	0	0	0	0	0	1.331
Bm196992	0.269	0	0	0.988	0	0	0	0	0.222
Bm027668	9.753	24.366	9.595	6.911	6.503	5.227	9.13	6.846	6.242
Bm290663	0.283	0	0	0.462	0.23	0.507	0.469	0	0.233
Bm167417	0	0	0	0.335	0	0	0.566	0	0
Bm309098	0.369	0.21	0.317	0.137	0	0.19	0.232	0	0
Bm036782	0.608	0.093	0.846	0	0	0	0	0.751	0.684
Bm244339	0.449	0.501	0	0	0.122	0	0	0.127	0
Bm120706	0.168	0	0.127	0.135	0	0	0.243	0	0.27
Bm252045	0	0	0	0	0.322	0	0	0	0
Bm120443	21.312	16.13	20.741	10.554	10.398	11.325	9.613	14.865	8.605
Bm212044	0	0.25	0.634	0	0	0.134	0	0	0
Bm310025	0.346	0.289	0	0	0	0	0.286	0	0
Bm126850	0	0	0	0.877	0	0	1.113	0	0
Bm308418	0.559	0.764	0.285	0	0.091	0.2	0.324	0.323	0
Bm292923	0.149	0	0	0	0.045	0.033	0	0	1.692
Bm325339	1.244	0	0.916	0	0	0	0	0	0.068
Bm270793	0	0	0.214	0	0	0.45	0	0	0
Bm056199	0	0	0	0	0	0	0.274	0	0
Bm179402	0.381	0.479	0.973	0	0	0	0	0	0
Bm255013	0	0	0	0.516	1.029	1.295	3.291	2.457	2.012
Bm037823	0	0	0	0.497	0.849	0.624	0.072	0.222	0.43
Bm021420	0.377	0.79	0.481	0.308	0.307	0	0.468	0.16	0.155
Bm103952	0	0.958	0.483	0	0	0	0.059	0	0.079
Bm006964	18.968	20.959	19.052	18.186	18.597	20.242	23.842	24.937	25.153
Bm066086	0	0.547	0.236	0	0.595	0	0.935	0.035	0
Bm197352	0	1.366	0	0	0	0	0	0	0
Bm033148	0	0	0	2.016	0.136	0.3	0	0	0.414
Bm065255	0	0	0	0	0.331	0.182	0.674	0	0
Bm013435	1.494	3.199	2.399	0.406	0.81	0.149	0.275	0.141	0
Bm283451	0.04	0	0	0	0	0	0.375	0	0.276
Bm109378	0.351	0.074	0	20.495	23.139	18.17	30.829	28.783	31.233
Bm029050	0	0.742	0.316	0.18	0	0.205	0.138	0.089	0
Bm124330	0.206	0	0.315	0.403	1.572	1.032	0.375	0.629	0.712
Bm292173	0	1.322	0.122	0.585	0	0.257	0.119	0.244	0
Bm229612	0	0.502	0	0.489	0	0	1.653	0	0
Bm186480	0.726	0	1.851	0	0	0	0	0	0
Bm212949	0	0	0	1.065	0.455	0.835	0.463	0.158	0.615
Bm197380	0	0	0	0.216	0.43	0	0	0	0
Bm109090	0	0	0	1.131	1.763	2.37	1.374	0.617	0.813
Bm046129	0.673	0.063	0.762	0	0.061	0.201	0	0	0
Bm158504	9.949	6.623	9.409	14.3	8.84	11.924	9.109	10.135	8.04
Bm251768	0.759	0.127	0.129	0	0	0	0.251	0	0.375
Bm204432	0.27	0.376	0.076	0	0	0.242	0	0	0
Bm218147	0	0	0	0	0.738	0.135	0.25	0.514	0.249
Bm036170	0	0.18	0.2	0	0	0	0.541	0	0.404
Bm295506	0	0.909	0	0	0	0	0.18	0	0
Bm277037	0.129	0.073	0.129	0.046	0.05	0	0.061	0.087	0
Bm306166	1.129	0.105	0.32	0.102	0	0	0	0	0
Bm064137	0.387	0	0	0	0	0	0	0	0
Bm011105	16.839	10.353	17.249	7.419	6.355	9.062	7.511	8.815	7.26
Bm037761	0	0.177	0.36	0	0	0	0	0.18	1.222
Bm113109	0	0	0	0.117	0.2	0.247	0	0	0
Bm209473	0	0	0	0.774	0.855	0.588	1.638	1.205	0.892
Bm104344	0.502	0	0.142	0.137	0.544	0.15	0	0	0.138
Bm166067	0	0.583	0	0.146	0.337	0.1	0.198	0	0
Bm314689	0.515	1.1	0.369	0	0	0.322	0	0.367	0.21
Bm284313	0.331	0	0.355	0	0	0	0	0.335	0.354
Bm132822	1.053	4.748	1.635	0	0	0	0	0	0
Bm031183	0	0	0.067	1.311	1.593	1.72	1.719	4.029	4.07
Bm272951	0	0	0	0	0.263	0	0	0	0.266
Bm121453	2.595	6.062	4.2	9.717	9.698	9.419	11.176	11.378	8.185
Bm077777	0	0	0	0.219	0.218	0.4	0.222	0.836	0.295
Bm214737	0	0	0	0.469	0.156	0	0.476	0.081	0.158
Bm199825	0.63	1.059	0.367	0.147	0.147	0.162	0	0.153	0.298
Bm004203	0.139	0.465	0.59	0.113	0	0.497	0	0.118	0
Bm206713	0.509	0.446	0.974	1.335	1.28	1.742	2.29	1.445	1.788
Bm252869	0	0	0	0.237	0	0	0.24	0	0
Bm015235	0	0	0	0.265	0	0.291	0.806	0.276	0
Bm102251	0	0	0	0.095	0.473	0.104	0.482	0	0
Bm275616	0	0	0	0.142	0.355	0.938	0.072	0.297	0.36
Bm035462	190.663	180.055	185.631	463.995	478.962	432.775	350.117	361.98	452.304
Bm185962	0	0	0	0.421	0.42	0	0.214	0	0
Bm314936	19.117	12.847	19.823	12.513	9.737	11.67	9.74	8.035	7.449
Bm057762	0	0.614	0.312	0.299	0	0	0	0.623	0
Bm002238	11.089	7.75	11.677	45.446	41.554	45.255	41.382	42.609	40.524
Bm298724	0	0	0	0.115	0.345	1.013	0	0.12	0.233
Bm242139	0	0	0	0.125	0.249	0.55	0	0	0.126
Bm051825	29.133	27.218	29.549	12.924	13.188	12.044	17.201	15.884	13.315
Bm056872	0	0.274	0	0	0	0	0	0	0
Bm098757	0.184	0.308	0.312	0.3	0	0.165	0.152	0	0
Bm088294	0	0	0.318	0.21	0	0.361	0	0	0.179
Bm287574	0.209	0.699	0.177	0	0.17	0	0	0	0
Bm020378	29.291	29.257	32.49	21.938	24	24.847	19.807	23.106	19.923
Bm202841	0	0	0	0.132	0.396	0	0.461	0.207	0.067
Bm276884	0.223	0.187	0.947	0.182	0	0.399	0.738	0.568	0.184
Bm051635	0	0.253	0	0	0	0	0	0	0
Bm317572	0.212	0.106	0.396	0.415	0.448	0.19	0.772	0.216	0.035
Bm228451	1.664	0	1.571	0.302	0	0	0	0.157	0.305
Bm267205	1.574	0.929	0.91	0.331	0	0	0	0	0.332
Bm111448	4.966	4.724	5.151	4.977	5.121	6.527	5.345	5.658	5.462
Bm180981	1.143	1.925	1.73	0.534	0.197	0.22	0.571	0.556	0.889
Bm264008	0	0.811	0.77	0.467	0.889	0.529	0.406	0.435	0.119
Bm142023	10.562	11.843	8.979	0.53	0.132	1.31	0.807	0.829	1.474
Bm079904	0.706	1.484	0.548	0.128	0.221	0.3	0	0.067	0.564
Bm144399	109.273	224.451	112.267	24.81	19.505	25.896	37.957	37.331	45.76
Bm057212	0.342	0	0.291	0	0.139	0	0	0	0
Bm188655	0	0	0	0	0.4	0.147	0	0.279	0.541
Bm058625	0	0	0.163	0.157	0	0.344	0.636	0	0.158
Bm280475	0.09	0.038	0.115	0.442	0.367	0.89	0.336	0.307	0.372
Bm160760	0	0	0	0.435	1.052	1.699	0.44	0.346	0.313
Bm125471	0	0	0	0.229	0	0	0	0.238	0
Bm095671	0.327	0.656	0.37	0.491	0.074	0.103	0.492	0	0.279
Bm021022	0.453	0	0.674	0	0.184	0.102	0.094	0.385	0
Bm242082	0.046	0	0	0.098	0.162	0.099	0.152	0.571	0.918
Bm101728	1.12	1.731	1.046	0.09	0.359	0.198	0.457	0.107	0.204
Bm249908	0	0	0	0	0	0.696	0.214	0	0
Bm028158	4.465	5.288	3.289	1.949	0.953	1.641	2.846	2.06	2.098
Bm230993	0	0	0	0.195	0.195	0.107	0	0.102	0
Bm027022	0.043	0	0	0.507	0	0.419	0	0.178	0
Bm256150	0.17	0.426	1.01	0.138	0.138	0.152	0.281	0.433	0.56
Bm330277	0	0.382	0	0	0	0	0	0	0
Bm134335	0	0	0	0.661	0	0	0.335	0	0
Bm100916	0	0.583	0.507	11.335	11.496	13.995	7.042	4.259	4.4
Bm255961	7.591	22.666	8.445	6.744	5.831	4.943	6.488	6.695	7.109
Bm285189	0.457	0.128	0.737	0.124	0	0.273	0	0	0
Bm206505	1.835	0.659	0.446	2.566	2.131	1.879	1.736	0.891	1.945
Bm121542	0.869	0	0.106	0	0	0	0	0	0
Bm256882	0.336	0.141	0.784	0.374	0.497	0.235	0.807	0.417	0.197
Bm018069	2.038	3.792	3.885	0.539	0.878	0.156	1.9	3.848	2.582
Bm291251	0.655	0.253	0	0	0	0.045	0	0.685	0.581
Bm048039	2.869	0.601	2.835	0.029	0.087	0.096	0.03	3.139	3.755
Bm103973	0.53	0.355	0.3	0.663	1.349	0.886	0.438	0.66	0.378
Bm298490	0.493	0.103	0.629	0	0	0	0	0	0.056
Bm081327	0	0	0	0.864	0	0	0	0	0
Bm186959	0	0	0	0.453	0.904	1.162	5.215	2.677	3.208
Bm236917	0.673	0.959	1.514	0.197	0.198	0.16	0.083	0.295	0
Bm201494	0	0.154	0	0	0	0	0	0	0
Bm183683	0.12	0	0	3.383	2.59	1.454	0.895	1.736	1.288
Bm177088	0	0	0	0.093	0.371	0.204	0.472	0	0.282
Bm014603	0.602	0.964	0.805	0.094	0.031	0.209	0.351	0.261	0.216
Bm304710	7.952	1.715	4.129	2.377	1.028	3.09	1.589	0.578	1.956
Bm297396	0	0	0	0	0	0.536	0	0	0
Bm266677	0.301	0.351	0.341	0	0.163	0	0	0	0.083
Bm215545	0	0.345	0	0	0	0	0	0	0.227
Bm080834	0	0	0	0	0.692	0.286	0	0	0
Bm039917	1.128	1.652	1.16	0.788	1.401	1.649	1.707	2.383	2.709
Bm082999	0.888	0	0.336	0	0.08	0	0	0	0
Bm022071	12.498	2.981	10.78	0	0.074	0	0	9.072	11.284
Bm169133	0.216	0.246	0.43	0	0	0	0.049	0.096	0.292
Bm249558	0	0	0	0.207	0	0	0.105	0.324	0.209
Bm107949	0.763	0.759	1.379	0	0.116	0	0	0	0
Bm313960	0	0	1.184	0	0.204	0	0	0	0
Bm163245	0.502	0.13	0.508	0.381	0.822	0.189	0.579	0.329	0.744
Bm071719	3.297	0.569	3.251	1.329	0	0.931	0.873	0.971	0.979
Bm177650	0.336	0.261	0.285	0	0	0.12	0	0.057	0
Bm047695	0.518	1.389	0.529	0	0	0	0.086	0.088	0.085
Bm328425	0	0	0.193	0	0.185	0	0	0	0.188
Bm097292	1.03	1.8	0.902	1.209	0.647	1.012	0	0.945	0.804
Bm025211	2.311	2.183	1.881	0.117	0.116	0	0.059	0.304	0.177
Bm205567	0	0.127	0.058	0.168	0	0	0	0.116	0
Bm062692	0.103	0.14	0.275	0.612	0.232	0.562	0.413	0.485	0.715
Bm023107	0	0.188	0.191	0	0	0	0	0.382	0
Bm331983	0	0.182	0.558	0.091	0.137	0	0.082	0.347	0.141
Bm290629	0	0.215	0	0	0	0	0	0	0.212
Bm090866	0	0	0	0.462	1.919	0.761	1.485	0	0
Bm200722	2.323	1.081	0.219	0	0	0	0	0	0
Bm030476	0	0.335	0.33	0.342	0.244	0	0.116	0	0
Bm274209	0	0.359	0	0.233	0	0.128	0	0	0.118
Bm252484	1.132	0	0	0	0	0	0	0	0
Bm159178	0	0	0.328	0.912	0.14	1.084	1.291	1.809	1.115
Bm315838	0	0.979	26.432	4.707	2.584	0.752	193.317	38.245	8.895
Bm271760	0.356	0.199	0.302	0.194	0.096	0.319	0.884	0.705	0.293
Bm299310	0	0	0	0.265	0.353	0	0.179	0	0.089
Bm110982	0.511	0.257	0.261	0	0.083	0.092	0	0.261	0.59
Bm121769	0.291	1.95	1.979	0.237	1.419	1.303	0.963	0.989	0.24
Bm044377	0	0	0	0	0	0.51	0	0	0
Bm061363	9.391	8.66	8.549	7.091	7.551	7.378	9.255	9.203	8.062
Bm306467	0	0	0.089	0.156	0	0	0.343	0	0.525
Bm237691	0	1.603	0	0	0	0	0	0	0
Bm297505	0	0.842	0	0.592	0.408	0.441	0.44	0	0.475
Bm014754	0	0	0	0	0	0	0.234	0	0.372
Bm053962	0.407	0.411	0.692	0	0.165	0.182	0	0.519	0
Bm306446	1.152	0.724	2.693	0.705	0.234	0.516	0.477	0.734	0.237
Bm177504	0	0	0	0.081	0.125	0	0.572	0.261	0.383
Bm041623	22.524	16.004	22.752	23.465	24.113	28.758	25.957	29.186	24.102
Bm239936	389.758	278.68	389.938	437.712	462.023	464.002	385.146	451.537	430.315
Bm001203	0	0	0	0	0.461	0.206	0.145	0	0.152
Bm035766	0.114	0.668	0.097	0.279	0.093	0.102	0	0	0.094
Bm143847	3.895	2.435	4.814	41.249	28.68	38.843	36.703	44.242	38.361
Bm293416	0.231	0	0.24	1.842	2.607	1.287	0.595	1.003	1.502
Bm224282	0	0	0	0.11	0.328	0.121	0	0.343	0.111
Bm223841	0	0.162	0.328	0	0	0	0.479	0	0.159
Bm137196	0.184	0	0	0	0.299	0	0	0	0.152
Bm325170	0	0.242	0	0.354	0	0.259	0	0.123	0
Bm188650	0.266	0.415	0.467	0.379	0.117	0.204	0.183	0.552	0
Bm118199	0	0	0	0.197	0.197	0	0	0.206	0
Bm332187	3.891	6.096	3.619	3.962	6.013	5.448	3.852	6.162	4.231
Bm044972	0.316	2.342	0.458	0	0	0	0	0	0.168
Bm165949	0.305	0	0	0.248	0	0	0	0	0
Bm045442	0	0	0	0.32	0.319	0	0	0.167	0.162
Bm049417	0	0	0	24.492	4.929	1.077	0.956	1.145	2.499
Bm283985	2.154	5.078	4.981	1.874	1.053	0	1.74	2.425	3.06
Bm019472	29.543	51.523	29.871	12.082	5.915	10.854	13.256	18.967	14.02
Bm321928	0.19	0.467	0.286	1.039	1.475	1.639	2.495	1.578	1.113
Bm057035	0	0	0	0	0.546	0.301	0	0	0.277
Bm006184	0	0	0	0.107	1.064	0.117	0.433	0	0.216
Bm078307	0	0	0	0	0.371	0	0.191	0	0
Bm049253	5.503	11.265	5.395	4.049	4.089	4.678	5.112	6.933	6.405
Bm254440	0.124	0	0.114	0.092	0	0	0.156	0.097	0.296
Bm210216	1.25	0.34	0.998	0.628	2.068	1.095	1.242	2.012	1.062
Bm220221	0.39	0.163	0.332	0	0.476	0	0	0.166	0.161
Bm275583	0	0.667	0	0	0	0	0	0	0
Bm049207	0	0.844	0	0	0.164	0	0.167	0.171	0
Bm277506	0	1.527	0	0	0.289	0	0.458	0	0
Bm151156	0	0	0.058	0.221	0.771	1.153	0	0.288	0
Bm249864	0.525	0.11	0	0.321	0.107	0.118	0.217	0.558	0.108
Bm155568	0.387	0.493	0.366	0.106	0.103	0.297	0.284	0.456	0.257
Bm055579	7.591	6.452	8.277	2.334	3.762	1.323	3.389	3.074	4.397
Bm223649	0.465	0.56	0.692	0.142	0.189	0.208	0.433	0.321	0.287
Bm226306	0	0	0	0.81	0.367	0.404	0	0	0.595
Bm186600	0	0.174	0	0.339	0	0	0.689	0	0
Bm076410	0	0	0.297	0	0	0	0	0.595	0
Bm325344	0	0	0	0.512	0.55	0.216	0.36	0.246	0.398
Bm282474	0	0	0	0.354	0.117	0	0.239	0.246	0
Bm041043	0	0	0	0.434	0.722	0.795	0	0.302	0
Bm047451	0.253	0	0.353	0	0.24	0.128	0.148	0.348	0
Bm325864	0	0	0	0	0.588	0.093	0.286	0	0.085
Bm047332	0	0	0	0.143	0.495	0	0	0.354	0
Bm237473	0	0	0	0	0	0	0	0.531	0.23
Bm172424	2.123	2.442	2.542	2.335	2.603	1.794	2.116	4.059	4.659
Bm058589	139.772	174.522	140.6	199.918	164.522	139.662	273.49	174.687	272.559
Bm163967	35.386	35.046	32.892	41.826	46.659	38.816	36.552	27.264	29.179
Bm166026	0.344	0.288	0	0.421	0	0	0	0	0
Bm184765	0	0	0	0.608	0	0	1.028	0	0
Bm243624	0.424	0.355	0.258	0	0.099	0	0	0	0
Bm055097	7.36	2.366	7.505	0.306	0.195	0.534	0	0	0.526
Bm044448	2.599	1.727	1.333	145.603	167.057	222.076	61.039	63.404	48.43
Bm247779	6.154	4.057	6.385	8.465	7.979	7.885	9.003	8.327	7.45
Bm193507	4.962	8.615	5.438	3.122	3.306	2.571	4.554	4.421	4.733
Bm098470	0	0	0.554	0.135	0	0	0	0	0
Bm011479	0.084	0.159	0	0.207	0.44	0	0.078	0	0
Bm248772	0	0	0	0	0.56	0.308	0	0.292	0
Bm279068	0	0.8	0.25	0	0.06	0	0.122	0.062	0
Bm179043	0.307	0.514	1.043	0	0.125	0	0	0	0
Bm003578	0.824	0.1	0.622	0.919	0.666	1.155	0	0.015	0.783
Bm225837	0	0	0	1.004	1.455	1.403	0.463	0	0
Bm092509	0	0	0	2.932	2.139	1.957	3.476	1.182	0.775
Bm197678	19.961	11.307	16.331	11.242	13.805	18.807	12.261	15.41	7.76
Bm172783	1.061	0.407	1.659	0.633	1.407	0.675	0.87	0.767	1.114
Bm232401	0	0	0	0.789	0.225	0.124	0	0	0
Bm135213	0.545	2.161	1.528	0.202	0.236	0.494	0.717	0	0.749
Bm154923	1.31	0	1.004	0	0	0.019	0	1.077	1.505
Bm119487	1.495	2.451	1.809	3.161	2.282	1.203	3.547	3.065	2.362
Bm169236	0	0	0	0.233	0.58	0.128	0.236	0.121	0
Bm258445	2.158	0	1.427	0	1.853	2.149	0	2.548	1.187
Bm172745	0	0	0	0	0.059	0	0	0	0
Bm268145	1.227	2.056	1.043	1.335	0.665	0.733	0.339	0.348	1.012
Bm159563	0	0.353	0	0	0	0	0.872	0	0
Bm015736	2.901	0.64	2.077	0.031	0.062	0.068	0	2.79	3.368
Bm326858	0	0	0	0.561	0.671	0.801	0.854	0.117	0.113
Bm257474	0.73	0.349	0.355	0.51	0.593	0.374	0.259	0.177	0.172
Bm213990	0.679	0.672	0.424	1.662	0.966	2.582	0.906	1.384	1.318
Bm109308	0	0.343	0.174	0	0	0	0	0	0
Bm187354	0	0	0	1.854	1.445	2.058	1.188	0.992	0.911
Bm316303	0.469	0.722	0.539	1.269	1.12	1.364	1.183	1.378	0.965
Bm292333	11.947	6.299	12.52	20.085	13.903	18.548	18.333	21.534	20.637
Bm161173	0	0.155	0.72	0.377	0.767	0.975	0.569	0.802	0.852
Bm005252	0	0	0.105	0.303	0.302	0.222	0.205	0.316	0.204
Bm101008	0.479	0	0.978	0	0	0.086	0	0	0.237
Bm074879	0	0.987	0.052	0	0	0	0.069	0.095	0.066
Bm150437	0	0	0	0.468	1.397	0.942	1.305	0.122	0.118
Bm174539	0	0	0	0	0.396	0.109	0	0	0
Bm183577	0.165	0	0	1.214	1.21	1.333	0.821	0.703	0.136
Bm005956	1.668	1.747	2.836	0	0	0.374	0	0	0
Bm025419	0	0	0	0	0.103	0.227	0.315	0.539	0.209
Bm070450	0.188	0.261	0.065	0	0	0	0	0	0
Bm035369	0	0	0	1.308	0.652	1.675	0.442	0.227	0.22
Bm047057	0	1.814	0	0	0	0	0	0	0
Bm218112	1.794	0.167	1.52	0.054	0	0.03	0.055	0.028	0.11
Bm233339	0.307	0	0.131	0	0	0	0	0.261	0
Bm075384	0	0	0	0	0	0	0	0	1.135
Bm199627	0	0	0	0	0	0.148	0	0.281	0
Bm277317	0	0	0	0	0.609	0.336	0.775	0.478	0.154
Bm158913	1.264	0	1.11	0.31	0.409	0.83	0	0.573	0.496
Bm124547	0.291	0.731	0	0	0	0	0	0	0.24
Bm001594	0.367	0.197	0	0	0	0	0	0	0
Bm274995	0	0	0.065	0.497	2.293	0.683	0.379	0.13	0.314
Bm233587	0.572	1.637	0.178	1.484	0.46	0.5	0.229	1.089	0.416
Bm315997	0	0	0	0	0	0	0.5	0.411	0
Bm244527	0	0.077	0	0.493	0.369	0.443	0.364	0.093	0.216
Bm302439	0	0	0	1.675	0.812	1.143	1.772	1.766	1.106
Bm164415	3.098	0.684	2.006	6.266	8.067	7.978	5.862	4.963	5.994
Bm184479	0	0	0	0.425	0	0.467	0.431	0	0
Bm134187	0	0.243	0.246	0	0	0	0	0	0.239
Bm186456	0	0.827	0	0.161	0	0	0.49	0	0
Bm280254	0.094	0.277	0.269	0	0	0.06	0	0	0.032
Bm151694	0.291	0	0	0	0.118	0.13	0	0.124	0
Bm319257	0	0	0	0	0.226	0	0.231	0	0
Bm185008	0	2.415	0	0	0	0	0	0	0
Bm086481	0	0.585	0	0	0	0	0	0	0.192
Bm286990	0.397	0.367	0.326	0.036	0.029	0.042	0.079	0.064	0.143
Bm282434	3.963	6.338	3.43	0.059	0.176	0.065	0.597	0.122	0.178
Bm069640	1.544	3.018	2.953	2.625	5.022	2.19	2.024	2.406	2.016
Bm076851	0.197	0	0	0.161	0	0	0	0	0.325
Bm156878	0.232	1.654	0.099	0.095	0.189	0	0.192	0	0
Bm298604	0.07	0	0	0.17	0.51	0.312	0.115	0.473	0.172
Bm091843	0	0	0	0	0.508	0	0.259	0	0.515
Bm010606	0.941	0.335	1.293	0	0	0	0	1.429	1.502
Bm081919	0.3	0.759	0	0.119	0	0.13	0.125	0.124	0.12
Bm139635	0	0	0	0	0	0	0.249	0	0
Bm107107	0	0	0	0	1.01	0.742	0.171	0	0
Bm264029	0	0.842	0	3.518	3.873	3.299	2.967	0.631	2.959
Bm159532	0	0.982	0	0	0	0	0	0	0
Bm283764	0.132	0	0	0.108	0.215	0.356	0	0	0.109
Bm318863	0	0	0	0.492	0.612	0	0	0.256	0.124
Bm239853	1.205	0.631	1.024	0.645	0.255	0.27	0.748	0.256	0.248
Bm109655	0.501	0.6	1.218	0.351	0.233	0.193	0.178	0.183	0.177
Bm087508	0	0	0	0	0.127	0.14	0	0.266	0.258
Bm220407	0.89	0.248	0.882	4.7	4.385	6.703	1.35	1.26	1.1
Bm101317	0.591	0	0.101	0.579	2.115	0.636	0.979	0.502	0.683
Bm324518	1.88	1.599	1.001	0.646	0.959	0.517	0.533	0.737	0.556
Bm096493	1.005	0.553	1.039	0.054	0.089	0	0	0	0
Bm324891	2.967	3.864	5.063	0.001	2.213	0.559	1.65	1.502	0.546
Bm116938	0	0	0	0	0.827	0.911	0.421	0	0.21
Bm193660	0	0.418	0	0	0	0	0.22	0.151	0
Bm319315	19.104	41.768	19.864	7.506	5.165	6.121	9.362	8.011	7.597
Bm253279	0	0	0	0	0	0	0.213	0	0.424
Bm001459	1.219	0	0.814	0	0	0	0	0	0
Bm256729	1.478	0.527	0.795	0	0	0	0	1.415	1.272
Bm153793	0	0.252	0.435	0.126	0.49	0.617	0.56	0.568	0.546
Bm176341	0	0	0	0.381	0.127	0	0.129	0	0
Bm225832	0	0.36	0	0.234	0	0	0.474	0	0
Bm333998	0.518	1.109	0.561	0.735	0.304	0.708	0.462	0.725	0.891
Bm033648	0	0	0	0	0.019	0	0	0.13	0
Bm243340	0	0.405	0.336	0	0.073	0	0	0	0
Bm313996	0	0	0	0	0	0	0.345	0	0
Bm091500	0	0	0	0.628	0	0	0.637	0	0
Bm119618	1.001	0.427	0.929	0	0	0.288	0.223	0.352	0.269
Bm255619	0	0	0	4.242	3.003	2.595	1.677	1.699	0.906
Bm230814	0	0.236	0	0	0.457	0	0	0	0
Bm166499	8.26	9.406	6.912	2.001	0.84	0.463	1.816	0.658	2.022
Bm154110	0	0	0	0.157	1.093	0	0	0.163	0
Bm042866	0	0	0.237	0.114	0.34	0.5	0.693	0.237	0
Bm190984	16.457	91.677	16.296	4.307	5.143	3.138	7.732	6.923	5.972
Bm130896	0.478	0.28	0.131	1.679	1.364	1.424	1.289	0.959	1.804
Bm052619	0.418	0.35	0.829	2.954	1.925	1.372	1.153	1.302	0.115
Bm252815	0.315	0	0	0	0.061	0.13	0	0	0.182
Bm137763	0	0.17	0.692	1.495	0.993	1.641	1.348	5.708	2.517
Bm268840	0	0	0	0.174	0	0.572	0.352	0	0.175
Bm178864	0	0	0	0.34	0.237	0.696	0.295	0.33	0.24
Bm048523	0	0	0.841	0	0.23	0	0	0.24	0.117
Bm210883	0.987	1.157	1.007	0.805	1.444	1.415	0.327	1.845	0.163
Bm074790	0	0	0	0	1.55	0.976	0	0.231	0
Bm325766	0.41	0	0.185	0	0	0	1.054	0	0.125
Bm284782	0	0	0	0.225	0.112	0.247	0.799	0.117	0.227
Bm126987	0.688	0	0	0	0	0	0	0	0
Bm011528	49.685	51.477	52.535	28.676	34.38	35.834	34.516	26.626	31.512
Bm195652	0	0.599	0	2.287	2.158	1.36	3.739	1.908	2.678
Bm200007	0	0.258	0	0.251	0.25	0	0	0	0
Bm087269	0.132	0.221	0	0.216	0	0.473	0.656	0.225	0.327
Bm259731	2.458	2.813	2.986	2.146	2.925	2.943	2.788	0.767	0.927
Bm068913	0	0.166	0	0	0	0	0	0.239	0
Bm131244	0	0	0	0.512	0.127	0.14	0.26	0.133	0.129
Bm190857	0	0	0	0	0	0	0	0	0.898
Bm065079	1.483	0	0.525	1.513	2.412	1.218	2.046	2.101	1.834
Bm222444	0	0	0.212	0	0	0	0	0	0
Bm106819	0	0	0	0	0.332	0.336	0.127	0.024	0
Bm150433	0	0	0	0	0.474	0.348	0.965	1.98	2.082
Bm152925	0.042	0.083	0.099	3.451	3.05	3.393	1.776	1.104	1.301
Bm221855	6.526	4.71	6.731	3.641	2.912	3.554	4.28	2.3	4.812
Bm054403	0.27	0.226	0	0	0	0	0	0	0
Bm137578	0	0.627	0.616	0.329	0	0.402	0.167	0	0.408
Bm192837	0	0	0	0.26	0	0	0	0.271	0
Bm083494	0.322	0.18	0.456	0.438	0.305	0.144	0.311	0.228	0.354
Bm280657	1.601	0.729	3.248	0.705	1.679	1.632	1.709	2.097	1.803
Bm274414	0	0.314	0	0	0	0	0	0	0
Bm249884	2.065	4.613	3.16	0.786	0.112	0.247	0.456	1.17	0.454
Bm320574	0.314	0.263	0.267	0	0	0	0.389	0.133	0.129
Bm024614	0.185	0.329	0.212	0	0.122	0.1	0	0	0
Bm120066	0	0	0	0.274	0.409	0	0.278	0.142	0.138
Bm100541	0	0.963	0	0.469	0.117	0	0.119	0.244	0.237
Bm300965	1.092	1.89	1.423	2.138	2.723	2.805	2.652	2.165	2.161
Bm042994	7.914	15.869	7.622	7.701	6.981	8.045	9.213	7.524	7.254
Bm176319	0	0.134	0	0.523	0	0	0.896	0	0
Bm270824	0.938	0.196	1.196	0	0	0	0	1.595	1.547
Bm332844	0.299	0.251	0	0	0	0.268	0	0.254	0
Bm308090	7.48	4.801	7.947	5.849	5.329	6.261	4.66	8.229	7.423
Bm175447	0.126	0.281	0.087	0	1.103	0.238	0.126	0.123	0.181
Bm169674	0.244	0.536	0.974	0.15	0.078	0.536	0.28	0.127	0.766
Bm105023	2.898	0.128	2.853	0.124	0.372	0.273	0.631	0.259	0.503
Bm041628	2.28	1.759	2.867	0.479	1.116	0.259	1.635	1.511	1.467
Bm085997	1.652	0.923	0.585	0.899	0.672	0.493	0.57	0.819	0.454
Bm278039	0	0.544	0	0	0	0	0	0	0
Bm008995	0	0	0	0	0.369	0.813	0	0.193	0
Bm284325	1.084	2.199	3.992	1.61	1.941	0.835	0.767	1.463	1.577
Bm217645	0.301	0.135	0.147	0.268	0	0	0.565	0.32	0.138
Bm246964	0.267	0.447	0	0	0	0	0	0	0
Bm054336	0	0	0	0	0.44	0	0	0.46	0.893
Bm099858	0	0.213	0	0.207	0	0.228	0.421	0.216	0.419
Bm020472	1.562	2.461	1.511	1.289	1.616	1.175	2.743	1.854	2.232
Bm310107	0.09	0	0	0.264	0.912	0.282	0.483	0.839	0.703
Bm081296	0	0	0	0.562	0.448	0.247	0.57	0.702	0.568
Bm270612	0	0	0	0.279	0.972	0.306	0	0	0
Bm086632	0	0	0	0.729	0.565	0.889	0.822	0.084	0.164
Bm091979	0	0	0	0	0.073	0	0.089	0	0
Bm274085	112.254	56.087	106.708	6.984	7.689	4.26	11.724	9.227	10.538
Bm014307	0	0	0	0	0	0	0.353	0.061	0
Bm151665	0	0	0	0.714	0.427	0.705	1.014	0.52	0.865
Bm028162	19.5	24.491	19.344	14.446	16.352	14.446	17.932	18.331	14.85
Bm206787	1.105	0.28	1.314	0.181	0.229	0.439	0	0.567	0.643
Bm136648	1.29	0.405	0.137	1.113	1.442	1.011	1.469	1.301	0.266
Bm046403	0.606	0.519	0.086	0.25	0.094	0.103	0.121	0.097	0.2
Bm218184	0	0	0	2.896	2.454	1.593	2.792	1.659	0.878
Bm034094	0.151	0.379	0.64	0	0	0	0	0	0
Bm001384	2.518	1.549	2.689	1.66	2.482	1.758	0	0	2.097
Bm004375	0	0.252	0.86	0.369	0.178	0.146	0.068	0.418	0.638
Bm196545	0	0	0	0.314	0	0.345	0	0	0
Bm170660	0	0	0	1.217	0	0	1.235	0	0
Bm200056	0.233	0.195	0.395	0	0	0	0	0.198	0
Bm161326	0.232	0.097	0	0.237	0.189	0.416	0.192	0	0.239
Bm173998	0.591	0.495	0.167	0	0	0	0.163	0	0.162
Bm053266	2.346	0.164	3.657	0.319	0.318	0	0.162	0	0.161
Bm333872	0	0	0	0	0	0	0.454	0	0
Bm167979	0	0.269	0	0.262	0	0.862	0	0.273	0.529
Bm188800	0.847	1.325	0.834	0	0	0	0.112	0.131	0
Bm327884	0	0	0.52	0.173	0	0	0	0.18	0.175
Bm059695	1.006	1.565	1.711	0.586	0.351	0.515	0.357	0.977	0.711
Bm033245	64.17	145.311	66.468	4509.121	3255.299	3622.951	3047.285	2771.824	2176.437
Bm182787	0	0	0	0.465	0.891	1.019	0.824	0.37	1.071
Bm195462	0	0.36	0	2.192	0	0	2.135	0	0
Bm216304	0	0	0	0	0	0	0.252	0	0
Bm261258	0	0	0	0	0	0	0.62	0	0
Bm133726	0	0	0.562	0	0	0	0	0.141	0
Bm209380	0	0	0	0.107	0	0	0.145	0.765	0
Bm113396	0	0	0	0	0	0.621	0	0	0
Bm164294	0	0	0	0	0.344	0.19	0	0.36	0.175
Bm319756	0	0	0	0.372	0.371	0	0.378	0.31	0.075
Bm068401	0.284	0	0.725	0	0.462	0	0	1.932	0.234
Bm189617	4.057	0.591	3.748	3.166	5.45	4.741	1.606	3.148	2.472
Bm225932	0	0	0	1.229	0.272	1.049	0.416	0.569	0.276
Bm267450	0.421	0.226	0.226	0	0	0	0	0.231	1.338
Bm317914	1.01	0.364	1.578	0	0.064	0	0	1.465	1.53
Bm093840	0	0	0	0.486	0.847	0	0.616	0.632	0.245
Bm129611	0	0	0	0.569	1.701	1.375	1.501	0.83	1.265
Bm171146	0	0	0	0	0	0	0	0.259	0
Bm259694	1.473	0	0.531	0	0	0	0	0	0.951
Bm107455	3.926	0	2.48	0	2.62	2.151	0	2.424	1.654
Bm067825	2.051	0.949	1.455	0.23	0.306	0.169	0.389	0.24	0.233
Bm043630	5.573	4.766	5.282	11.454	9.318	11.352	11.479	12.749	9.915
Bm239941	1.306	1.095	1.401	1.438	1.082	1.579	0.363	1.002	0.772
Bm313754	0	0	0	0.154	0.307	0.169	0.156	0.321	0.155
Bm157296	2.353	3.464	2.379	18.217	6.828	6.839	4.582	3.838	3.619
Bm318630	0	0	0	0.092	0.732	0.303	0	0	0
Bm195003	0	0	0	0.389	0	0	0.658	0	0
Bm239132	1.045	5.446	4.506	0.171	0.722	1.476	0.525	0.742	1.323
Bm311162	8.811	2.131	8.456	0.222	0.369	0.163	0	5.79	8.314
Bm007059	0	0.414	0	0	0	0	0	0	0.611
Bm308339	0.483	0	0.566	0	0.353	0.1	0	0	0
Bm011458	0.015	0.013	0.052	0.589	0.924	0.977	0.292	0.404	0.177
Bm076838	6.807	2.75	6.144	0.525	0.464	0.451	0.416	0.432	1.037
Bm335814	0.728	1.524	0.928	0.099	0.099	0	0.201	0	0
Bm206848	0	0	0	0.158	0	0.336	0.868	0	0
Bm033537	0	0.099	0.671	0.233	0.332	0	0	0.543	0.167
Bm209619	0	0	0	1.308	0.88	0.575	0.697	0.136	0.231
Bm030407	2.33	1.301	3.797	4.278	4.105	5.045	3.054	3.796	1.601
Bm242532	0	0	0	0	0.53	0.467	0	0.443	0.215
Bm209207	0	0	0	0.395	0.197	0	0	0.206	0
Bm040863	0.156	0.252	0.205	0	0	0.139	0	0	0
Bm233190	1.828	2.32	1.349	0	0	0	0	0	0
Bm146531	0	0.064	0	0.373	0.186	0.477	0.189	0.129	0
Bm032435	0	0	0	0.059	0	0.183	0	0	0
Bm140235	7.261	1.837	9.25	0.119	0.474	0.196	0	10.938	11.314
Bm296950	0	0.201	0	0	0.196	0.431	0.199	0	0.198
Bm035945	6.857	6.96	7.062	3.384	4.531	3.236	5.79	4.185	3.963
Bm258654	0	1.766	0	0	0	0	0	0	0
Bm117428	0.753	0.993	0	0.247	0.217	0.672	0	0.164	0.26
Bm333605	0	0.252	0.255	0	0.198	0	0.135	0	0.181
Bm116075	0	0	0	0.649	0.359	0.317	0	0.075	0.073
Bm313047	0	0	0	0.901	0	0	0	0	0
Bm091009	0	0	0	0	0.906	0.2	0.184	0.189	0.184
Bm294574	0.264	0	0.757	0	0.676	0.199	0.404	0.733	0.718
Bm299490	89.738	39.549	82.366	181.602	213.812	164.82	165.612	81.819	208.833
Bm093590	1.606	0.673	1.229	10.093	18.942	21.734	6.384	6.417	10.597
Bm267578	0	0	0	0.472	0	0.346	0.16	0.492	0.159
Bm105916	0	0	0	0.304	0	0	0	0	0
Bm191316	0	0.546	0	0.38	0	0	0.847	0	0
Bm238281	0.19	0	0	0.078	0.309	0.426	0	0.081	0.47
Bm042389	0.638	0.535	0.995	0.087	0	0.191	0	0.09	0.088
Bm262990	0	0	0	1.111	0.406	0.488	0.035	1.525	0.868
Bm065150	0.419	0.344	0.64	2.62	1.397	1.305	0.884	2.111	0.475
Bm015738	0	0	0	0	0.337	0.185	0.171	0.352	0
Bm173359	0	0	0	0.952	0.112	1.169	1.478	0.817	0.453
Bm228455	0.228	1.3	0.519	0.156	0	0.28	0	0	0
Bm074986	0.908	0.304	3.089	0	0	0	0	0	0
Bm283678	0	0	0	0.318	0	0	0	0	0
Bm119036	3.756	1.452	5.895	4.48	3.524	2.33	4.067	5.157	4.765
Bm284539	0.039	2.573	0	0.652	0.121	0	0.305	0.308	0.171
Bm154489	0	0	0	0	0.386	1.487	0	0	0
Bm054519	0	0	0	0.457	0.228	0.251	0.464	0	0
Bm164021	0	0	0	0.425	0	0	0	0	0
Bm176605	2.084	1.964	1.107	2.763	0.635	1.4	0.647	0.886	1.289
Bm121999	0	0	0	0.179	0	0	0	0.746	0.362
Bm322072	0	0	0.179	0.086	0	0.284	0.35	0.269	0
Bm254618	0	0.416	0	0.135	0	0	0.821	0	0
Bm236898	0	0	0	0	0	0.136	0.628	0.387	0.125
Bm001786	0.644	0.566	0.296	0.148	0.167	0.213	0.416	0.404	0.327
Bm034673	1.798	1.775	1.989	1.029	0.677	0.373	1.349	0.543	0.781
Bm104145	0	0	0	0	0	0	0	0.239	0.232
Bm295275	3.507	8.181	4.467	1.022	0.611	1.795	2.903	4.258	2.065
Bm255680	0.453	0	0	0	0	0	0	0	0
Bm018409	0.517	1.156	0.44	0.141	0	0.309	0.286	1.612	0.142
Bm177340	0	0.551	0.746	0.537	0	0	0.182	0	0.543
Bm214799	0.204	0.514	0.695	0	0	0	0	0	0
Bm014734	1.422	0	1.319	0	0.21	0.116	0.214	0.22	0.107
Bm212351	0.38	0	0.323	0	0.154	0	0	0.323	0
Bm072085	10.563	17.456	9.224	19.484	18.629	23.116	12.862	16.524	14.408
Bm183244	9.253	0	6.551	0	0.793	0.967	0	1.452	0.88
Bm163927	0	0	0	0.625	0.734	0.648	1.149	0.453	0.712
Bm144256	0	0	0	0.183	0.273	0.401	0	0.19	0.092
Bm014417	0.488	1.022	0	0	0	0	0	0	0
Bm301988	0.935	1.131	1.678	0.509	0.169	0.186	0.344	0.883	0.171
Bm064146	0.834	0.468	1.09	0.081	0.309	0.057	0.18	0.057	0.363
Bm012265	0	0	0	0.933	0.186	0.068	0	0.259	0.251
Bm236958	0	0	0	0.122	0.243	0.402	0.372	0	0
Bm299194	0	0	0	0.163	0.57	0.269	0	0.17	0
Bm171329	3.964	3.041	3.222	2.508	2.197	1.952	2.625	2.352	1.439
Bm100076	0.502	1.27	0.409	0.395	0.775	0.489	0.38	1.878	0.338
Bm129035	0	0	0	0.781	0.194	0.107	0.099	0.61	0.197
Bm023850	0.492	0.566	0.144	0.069	0	0.076	0	0	0.116
Bm078737	0.938	0.55	1.196	0.153	0.381	0.252	0.31	0.08	0.541
Bm170665	0	0	0	0	0	0	0.542	0.139	0.405
Bm070570	0.673	0	0.164	0	0	0.729	0	1.007	0
Bm315870	2.224	0	2.312	3.107	2.662	3.342	2.39	2.904	1.414
Bm013465	0	2.27	0	0	0	0	0	0	0
Bm287968	0	1.126	0	0	0	1.405	0	0	0.554
Bm224285	0	0	0.807	0	0	0	0	0.188	0.197
Bm113280	4.63	5.213	4.552	2.954	2.335	2.796	2.529	3.116	2.448
Bm209870	0	0	0	0.654	0.652	0	0.221	0.681	0.661
Bm139640	0.487	0.114	0.581	0	0	0.545	0	0	0
Bm103361	0	0.689	0.612	0.642	0	0	0.552	0.343	0.241
Bm234632	0	0	0	1.525	0	0	0.221	0	0
Bm213817	0	0.294	0	0.573	0	0.157	0.145	0	0
Bm164121	0	0	0	0.653	0	0	0.397	0.136	0
Bm237004	0	0	0	0.294	1.54	0.485	0.523	0.307	0.297
Bm107808	0	0	0	1.624	0.47	0.217	0	1.369	0
Bm044241	0.117	0	0	0.43	1.191	0.315	0.194	0.249	0.193
Bm071720	0	0	0	0.364	0	0	0	0.379	0
Bm329042	0	0	0.33	0	0	0	0	0	0
Bm072867	0	0.3	0	0	0	0	0	0	0.149
Bm097499	0.608	0.167	0.303	0	0	0.292	0	0	0.07
Bm264898	0.751	0.364	0.282	0.563	1.17	1.692	0.715	1.036	1.226
Bm234722	0.437	0	0.495	0	0	0	0	0	0
Bm184079	0	0	0	0	3.942	0	0	0	0
Bm276309	0.684	0	0.409	0.134	0	0	0	0	0.203
Bm245820	10.206	1.749	8.479	10.409	8.865	5.611	6.913	5.717	5.164
Bm318492	0	0	0	0	0.473	0.641	0	0.494	0.406
Bm199933	19.444	16.808	19.528	1.653	1.941	2.75	2.691	5.729	6.544
Bm089072	0	0	0	0	0.304	0	1.238	0.159	0.462
Bm251030	0	0.324	0.329	0	0	0	0	0	0
Bm127320	0	0	0	0	0.551	0.304	0	0.096	0
Bm285294	0.856	0.481	1.121	0.272	0.472	0	0.338	0	0.28
Bm326267	0	0	0	0	0	0.637	0.295	1.058	1.027
Bm100920	0.608	0	0	0	0	0	0	0	0.186
Bm108479	0	0	0	0.304	0.227	0.585	0.463	0.475	0.154
Bm088626	0	2.094	0	0	0	0	0	0	0
Bm198538	0.92	0	0.196	0	0.374	0	0	0	0
Bm281213	0	0	0	0.818	2.648	0	0.622	1.064	1.446
Bm223895	1.553	0	1.122	0.451	0.675	0.443	0.494	1.053	0.858
Bm113701	0.313	0.519	0.516	0.217	0.381	0.308	0.259	0.542	0.228
Bm324298	0.48	1.406	0.612	0.391	0.585	0.215	0.596	0.408	0.791
Bm229434	0.234	0.784	0.596	1.145	1.141	1.676	0.774	0.199	0.193
Bm156576	1.185	1.747	1.841	1.425	1.495	0.75	3.125	1.234	3.072
Bm091349	1.827	0.559	1.553	0	0	0.026	0	2.021	1.865
Bm021333	0.359	0.133	0	0	0	0	0	0.034	0.035
Bm301076	162.189	252.222	167.414	7.839	9.115	11.186	7.23	10.761	10.02
Bm300334	0	0	0	0	0	0.1	0.279	0.286	0
Bm045078	0	0	0	0.227	0	0	0	0	0
Bm139675	2.003	4.04	1.955	0	0.121	0.066	0.184	0.504	0.122
Bm334593	0	0	0	0.155	0.385	0.595	0	0.242	0.313
Bm202346	0	0	0	0.118	0.236	0.26	0.24	0.37	0.479
Bm302197	1.305	3.437	1.268	0.609	1.061	0.668	0.926	1.268	0.923
Bm239265	1.195	0	0.653	0	0.139	0.153	0	0	0
Bm059115	0.376	0.378	0.606	0.027	0	0	0	0.389	0.827
Bm072810	0.127	0	0.171	0.795	1.137	0.304	0.105	0.18	0.21
Bm036896	0	0	0	0	0	0	0	0.172	0
Bm086190	0.849	0.89	0.241	0.462	0.23	0	0.234	0.241	0
Bm202474	0	0.495	1.045	0.441	0.262	0.344	0.451	0.262	0.501
Bm172341	0	0	0	0.513	0	0	0	0	0.173
Bm024507	0.755	3.056	0.962	2.258	1.023	0.71	0.937	1.283	0.934
Bm084477	0.095	0	0	0	0	0	0.041	0	0
Bm228976	0.262	0.019	0	0	0	0	0	0	0
Bm261750	0.224	0.927	0	0.353	0	0.613	0.65	0.239	0.775
Bm270838	0.323	0.27	0.137	0.263	0.787	0.578	0	0.274	0.133
Bm237130	7.518	7.241	7.289	15.336	11.277	8.962	11.773	10.617	7.922
Bm253964	0.201	0.465	0.298	0.881	0.214	0.486	0.588	0.6	0.712
Bm172888	0.514	0.144	0.291	0	0	0	0	0	0
Bm260074	0.301	0.126	0.768	0	0.122	0.135	0	0	0
Bm101740	0	0.51	0	0.135	0.411	0	0.271	0.36	0.602
Bm118702	0	0.207	0	0	0	0	0	0	0
Bm210312	0	0	0	0	0.267	0	0.543	0	0
Bm291541	0.341	0.999	0	0	0	0	0.141	0	0
Bm307703	0.598	0.301	0.661	0	0	0	0	0.813	0.69
Bm238655	0	0	0	0	0.276	0	0.562	0	0
Bm100889	0	0	0	0.783	0.702	0.43	0.556	0.489	0.871
Bm159380	0	0.174	0.294	0	0	0	0	0	0
Bm267078	0.374	0	0.53	0	0.101	0	0	0	0
Bm170575	0	0.119	0	0	0	0	0.301	0.121	0
Bm328754	0	0.444	0	0.433	0	0	0.293	0	0
Bm060322	0	0	0	1.487	1.358	1.114	1.405	0.811	0.557
Bm262229	0	0.681	0	0	0	0	0	0	0
Bm021907	0	0	0	0	0.754	0.208	0	0.394	0.191
Bm244033	0.059	0	0	0.096	0	0.211	0.396	0.499	0.537
Bm105787	0	0	0	0.377	0.094	0	0.287	0.589	0.095
Bm187780	0	0	0	0	0.453	1.249	0	0	0
Bm150966	0.69	0.815	0.513	0.352	0.736	0	0.106	0.382	0.278
Bm066499	3.211	4.158	1.985	1.906	1.662	1.308	1.45	0.248	0.481
Bm325710	1.484	0.439	0.297	0.071	0.142	0.235	0.072	0.371	0.144
Bm205425	1.535	1.102	1.221	0.179	0.535	0.393	0.545	0.186	0.181
Bm068513	0.216	0.417	0	0.222	0	0	0.134	0.691	0.343
Bm053199	0	0	0	0	0.377	0.104	0.672	0.296	0.287
Bm184633	0	0	0	0.307	0.407	0.337	0.726	0.213	0.103
Bm133616	0	0	0	0.518	0.309	0.186	0.078	0	0
Bm155599	0	0	0	1.239	1.232	0.612	1.649	0.161	0.783
Bm036281	0.57	0.377	1.446	0	0.041	0	0	0.708	0.852
Bm000542	0.592	0.165	0.441	4.466	4.771	3.449	1.497	1.675	1.87
Bm331182	0.309	0.401	0.386	0.056	0.166	0	0	0.188	0.116
Bm176044	0	0.126	0.639	0.245	0.367	0.269	0	0.256	0.248
Bm200241	0	0	0	0	0.473	0	0.321	0.329	0
Bm328282	0.445	0.302	0.91	0.183	0.808	0.726	0.421	0.188	0.275
Bm030065	0.656	0.275	0.725	0.054	0	0.059	0	0	0.162
Bm331379	0.686	0.123	1.292	0.52	0.359	0.22	0.041	0.125	0.93
Bm130570	21.258	17.49	19.75	22.921	21.53	25.22	22.006	22.852	23.501
Bm012716	0.543	0.152	0.308	0	0	0	0	0	0
Bm016355	0	0	0	0.069	0.207	0	0.211	0.216	0.35
Bm304186	0	0	0	0	0	0.18	0	0.171	0.497
Bm294336	0.171	0	0	0.465	0.371	0.715	0.142	0.436	0.188
Bm130307	7.451	4.252	9.942	19.177	19.522	21.484	15.926	26.963	21.854
Bm171128	0	0	0	0.378	0	0.398	0.421	0.192	0.185
Bm038742	0.649	0	0	0	0	0	0	0	0
Bm170979	0	0.132	0	0.129	0	0	0.262	0	0
Bm121218	0	0	0.58	0	0	0	0	0	0
Bm066008	0.35	0.147	0.297	0.143	0	0	0.145	0	0
Bm156951	0.671	0.978	0.295	0.523	0.681	0.839	0.057	0	0.393
Bm139054	0.339	0.426	0.288	0	0	0	0	0.144	0.14
Bm236241	0	0	0	0	0.384	0.845	0	0	0
Bm072583	0	0.121	0.489	0	0.175	0	0.144	0	0
Bm257837	0.638	0.134	0.881	0.065	0	0	0	0.203	0.066
Bm332022	0	0	0	0	0.081	0	0	0	0
Bm157373	4.434	0.238	5.829	0	0	0	0	6.627	6.313
Bm323559	0	0.563	0	0	0	0.602	0.278	0.286	0
Bm277114	0.515	3.88	1.313	1.47	0.209	0	1.491	0.875	0
Bm170909	0	0	0.503	0.725	0	0	0.49	0	0.244
Bm280920	0.439	0.037	0.448	0	0.107	0	0	0.522	0.724
Bm228948	0	0	0	0.384	0	0	0.584	0	0
Bm096307	0.329	0	0	0	0	0	0.042	0.1	0
Bm262311	0.106	0	0.19	0	0	0.138	0.184	0.347	0
Bm047888	0.153	0	0	0	0.116	0.127	0	0.253	0
Bm315920	0.246	0.103	0.104	0.201	0.4	0	0	0.104	0.203
Bm117701	2.569	2.328	2.363	0.826	0.907	1.137	0.6	1.028	1.756
Bm251678	0	0	0	0.03	0	0.033	0	0	0
Bm217469	0	0	0	0.808	0.336	0.222	0.342	0	0
Bm055411	0	0	0.312	0	0.447	0.328	0	0.156	0.151
Bm090991	3.831	0.665	4.078	0.056	0.14	0.031	0.057	3.461	2.988
Bm017582	0.217	0.616	0.639	1.442	1.014	2.21	0.734	1.399	0.8
Bm069456	0.49	0.623	0.737	0	0	0	0	0	0.13
Bm056800	0.943	9.408	3.412	0.705	0.562	1.096	0.286	1.095	0.997
Bm311852	0.319	0	0.542	0.26	0.259	0.143	0	0.407	0.526
Bm013363	0.378	0.384	0.546	0.597	0.43	0.79	0.194	0.568	0.681
Bm246356	0	0	0	0.871	0	0	0.736	0	0
Bm260005	0	0.219	0	0	0	0	0	0	0
Bm116966	1.306	1.699	0.538	0	0	0	0	0	0.278
Bm029051	0	0.085	0	0.086	0.282	0.097	0.169	0.353	0.212
Bm116737	0	0	0.204	0.589	0.391	0.215	0	0	0
Bm192145	0	0.147	0.568	0.181	0.623	0.175	0.663	0.986	1.222
Bm207030	0.851	2.138	1.889	0	0.227	0	0.199	0.267	0
Bm157252	0	0	0	0.103	0.103	0.113	0.244	0	0.104
Bm045636	0	0	0	0.412	0.523	0.165	0.456	0.468	0.379
Bm038472	0	0	0.572	0.133	0	0	0	0	0.786
Bm310942	0	0	0	0	0	0	0.272	0	0
Bm062264	0	0	0	0.263	0.785	0.577	0.267	0	0.265
Bm026835	0.186	0	0	0.151	0	0.499	0.307	0	0.153
Bm064399	0	0	0	6.315	0	0	9.677	0	0
Bm072301	0	0	0	0.267	0	0	0	0	0
Bm055779	0	0	0	0.011	0	0	0.617	0.333	0
Bm026321	0	0	0	0.519	0.129	0.285	0	0	0.131
Bm203529	0.377	0.316	0.4	0.307	0	0	0.078	0	0.155
Bm182906	0.117	0.049	0.05	0.333	1.185	0.627	0.193	0.644	0.481
Bm061160	0	0	0	1.23	1.419	0.837	0.751	0.54	0.523
Bm102335	0	0	0	0.516	0.685	0.377	0	0	0
Bm194094	5.721	4.422	5.873	7.181	6.726	6.746	5.827	6.625	5.703
Bm027042	0	0.222	0.226	0	0	0.476	0	0	0
Bm102426	0.749	0.377	0.255	0	0.328	0.134	0.331	0	0.124
Bm045509	91.006	87.2	88.019	96.553	105.903	109.556	85.924	82.323	79.292
Bm046028	0.259	0	0	0	0.211	0.465	0.322	0	0.321
Bm282365	1.257	0	0.356	0	0	0	0	0	0
Bm179483	0.998	0.167	1.528	0.326	0	0	0	0.339	0
Bm257106	1.694	0	1.123	0	0	0	0	0	0
Bm087563	0	0	0	0.172	0.914	0.692	0.291	0.06	0.521
Bm031899	0	0	0	0.251	0.25	0.276	0.765	0.131	0
Bm230656	0.229	0.192	0.195	0.374	0	0.617	0.19	0	0
Bm224985	4.55	4.274	3.985	6.188	5.27	6.671	3.767	6.563	4.434
Bm239607	0	0	0	0.113	0.395	0.475	0.168	0.202	0.136
Bm038147	0	0	0	0.121	0	0	1.473	0	0
Bm300911	0.736	0.206	1.252	0.2	0.2	0.22	0.609	0.209	0
Bm035964	0	0	0	1.694	0	0	0.101	0	0
Bm080666	0.176	0	0.3	0	0	0	0	0.15	0.145
Bm123061	1.833	3.159	2.39	3.974	1.679	3.627	2.656	3.205	2.829
Bm220957	0.139	1.093	0.254	0	0	0	0.145	0.074	0.032
Bm232773	3.656	2.91	3.071	1.929	2.59	2.71	1.684	2.519	1.271
Bm042166	0.306	0	0.101	0.61	0.218	0	0	0	0
Bm059708	0	0	0	0.215	0	0.118	0.653	0.67	0.867
Bm297031	0	0.157	0	0	0.152	0.181	0.465	0.159	0
Bm063529	0	0.397	0.605	0	0	0	0.196	0	0.196
Bm067025	5.215	4.026	5.128	2.169	1.996	1.649	1.947	1.217	1.265
Bm148285	0	0.255	0	0.248	0.248	0	0	0	0
Bm044653	0	0	0	0.459	0	0	0.233	0	0
Bm028237	0	0	0.248	0.476	0	0.262	0	0.496	0.241
Bm102850	0	0	0	0.148	0.294	0	0	0	0
Bm123608	3.568	8.003	2.893	2.533	1.645	1.719	1.876	1.345	2.454
Bm167149	0	0	0	0.523	1.013	1.053	1.995	0.598	0.663
Bm054244	0.594	0	0.253	0	0.242	0.266	0	0.252	0
Bm277734	0	0	0.122	0.284	0	0	0	0.266	0.493
Bm228350	0.699	0.17	0.181	0	0	0.586	0	0.1	0.188
Bm255492	0	0	0.205	0.59	0.196	0	0.799	0	0.199
Bm146139	0.143	0.598	0.243	0	0.116	0	0.118	0.121	0
Bm125552	0.254	0.426	0.324	0	0.103	0	0	0	0
Bm199375	1.033	2.363	1.458	0.303	0.617	0.688	0.457	0.862	0.682
Bm334791	82.499	66.552	91.677	83.902	97.79	97.093	79.421	103.895	84.856
Bm282618	0.343	0	0.874	0	0	0	0.284	0.146	0
Bm103632	0.677	1.44	1.893	0.905	1.158	0.757	0.874	0.885	0.613
Bm066646	2.679	1.161	3.954	0	0	0.457	0	0	0
Bm285392	0.098	0	0.185	0.175	0	0.53	0.278	0.399	0.317
Bm124594	7.555	11.988	10.761	3.144	3.784	3.183	4.06	5.528	4.497
Bm192225	0.92	0.477	0.855	0.474	0.405	0.223	0.713	1.198	0.547
Bm001134	0.157	0	0	1.387	0	0	0	0.737	0.429
Bm168929	0	0	0	0.472	0	0.588	0.381	0	0
Bm036141	1.748	0.211	2.697	0	0	0.084	0	1.556	2.861
Bm321173	0	0	0	0.127	0	0	0.774	0	0
Bm182954	0	0	0.196	0	0	0.618	0	0	0
Bm178459	5.366	3.888	3.057	5.457	4.046	2.829	4.34	2.047	3.102
Bm258630	0	0	0	0.431	0.429	0	0.146	0	0
Bm198171	1.047	0.984	0.022	1.373	0.365	0.398	1.685	1.275	0.897
Bm231528	0.595	0.745	0.253	0.081	0.081	0	0.246	0.084	0.245
Bm317996	0	0	0	0	0	0	0.814	0.492	0.764
Bm268606	1.403	1.437	0.663	0.509	0.38	0.419	0.387	0.663	0.643
Bm285525	0	0.456	0	0.167	0	0	0.732	0	0
Bm303988	0	0	0	0	0	0.902	0	0	0
Bm300226	133.109	27.331	113.293	87.847	188.163	110.054	88.729	45.196	70.551
Bm325298	0	0	0	0	0.958	0.302	0	0	0.139
Bm278744	0	0.512	0.091	0.744	0	0.321	0.067	0.096	0
Bm089380	0	0.229	0.232	0	0	0	0	0	0
Bm077694	0	0	0	0.244	0.893	0.089	0	0	0
Bm048906	1.45	2.186	1.232	0.71	0.472	0.52	0.72	0.246	0.478
Bm188589	14.409	12.214	14.495	11.757	10.469	11.84	8.541	10.579	9.772
Bm243242	0	0	0	0.2	0.866	0.367	0	0	0
Bm288682	0.235	0	0	0.383	0.191	0	0	0.199	0
Bm169142	0.771	0.208	0.458	0	0	0	0	0	0
Bm098737	0.711	1.025	1.113	1.26	0.683	0.845	1.048	0.154	1.05
Bm321256	2.02	1.486	2.086	3.501	6.036	5.501	4.627	2.913	2.886
Bm166747	0.392	0.328	0	0	0	0	0	0	0.323
Bm197706	0	0	0	2.339	1.097	0.453	0.279	1.234	1.391
Bm125616	0	0	0	0.325	0	0	0.165	0.677	0.821
Bm318421	9.17	1.855	8.543	14.119	15.831	15.023	8.195	11.092	12.609
Bm223396	0	0	0	0.691	0.344	0	0	0.24	0.349
Bm013306	0	0.208	0.279	0.44	0.228	0.925	0.183	0.383	0.317
Bm012583	0	0	0	0	0	0	0	0	0.206
Bm096298	0.234	0.458	0.259	0.33	0.359	0.223	0.187	0.125	0.303
Bm281618	2.283	0.393	0.858	3.239	4.522	2.934	4.203	2.418	2.822
Bm221091	0	0	0	0.946	0.472	0	0	0	0
Bm138100	25.743	63.931	23.138	38.833	26.06	25.185	47.214	50.578	45.052
Bm074895	0	0	0	0.198	0.91	0.297	2.012	0.779	0.688
Bm059079	0.415	0	0	0	0	0	0	0	0
Bm129655	0	0	0	0.16	1.431	0.35	0.324	0	0
Bm049686	0	0	0	0	0.505	0	0.514	0.528	0.683
Bm239545	0	0	0	0.806	0	0	0	0	0
Bm237499	1.383	0	0.914	0.627	0.5	0.964	0.89	0.261	0.887
Bm092209	2.057	2.297	1.603	0.42	0.279	0.614	0.851	0.874	0.565
Bm319863	0.536	0.974	0.228	0.438	0.727	0.257	0.37	0.456	0.369
Bm170207	0.101	0	0.343	0	0	0	0	0.172	0.499
Bm321181	0	0	0	0.495	0.164	0.181	0.167	0.343	0.167
Bm278094	0	0	0	0.406	0	0	0.206	0	0
Bm218462	0	0	0	0	0	0	0	0	0.339
Bm096753	1.417	2.611	1.824	0.728	1.76	0.85	1.606	0.356	1.259
Bm037793	2.305	4.653	2.039	0.536	0	0	0.692	0.255	0.344
Bm083115	0.822	0.172	0.349	0.168	0.668	0.368	0.17	0.175	0.339
Bm269853	0.669	0.561	1.707	0.546	0.816	0.6	1.662	1.991	1.104
Bm335966	0	0	0.276	0	0	0	0	0	0
Bm005757	6.854	5.883	7.129	3.685	3.721	4.39	5.31	3.658	4.113
Bm100748	0.427	0.179	0	0	0	0.573	0.177	0	0
Bm293459	0	0	0	0.185	0	0.203	0	1.154	0.933
Bm323361	1.135	7.584	2.375	1.462	2.407	1.093	2.679	1.863	1.362
Bm195416	9.553	3.887	10.364	102.265	114.162	155.295	72.163	61.321	87.479
Bm282486	1.038	0.261	1.236	0.042	0	0	0.043	1.235	1.027
Bm320786	2.147	1.028	2.086	0.334	0.333	0.366	0.762	0.435	0.253
Bm177769	0	0.452	0	0	0	0	0	0	0
Bm095162	2.349	0.154	1.88	0	0.262	0.041	0	0.783	0.532
Bm027919	0.655	0.548	0	0	0.355	0	0	0	0
Bm039060	0	0	0	0.496	0.165	0	0.671	0.344	0.334
Bm166572	0.56	0.332	0.611	0.445	0.325	0.329	0.606	1.017	0.627
Bm074409	0.136	0	0	0.779	0.554	0.244	0.903	0.232	0.675
Bm017887	0.749	0.418	1.274	0.204	0	0.224	0	0.425	0
Bm025622	0.698	1.588	0.806	1.099	0.811	0.581	0.743	0.594	0.74
Bm286165	31.309	74.029	37.778	2.873	1.971	2.906	3.391	2.243	1.75
Bm057294	0	0	0	0	0.6	0.33	0.407	0.104	0
Bm315777	0.681	0	1.283	0	0	0	0	0	0
Bm288767	158.425	152.942	163.697	30.65	39.591	35.492	42.872	32.684	36.719
Bm333608	0.022	0	0	0.746	0.544	0.34	0.886	0.91	0.441
Bm033145	0	0	0.087	0	0.156	0	0	0	0
Bm167280	8.619	7.733	10.45	95.653	97.733	103.777	71.945	69.577	76.238
Bm158339	12.477	7.794	12.673	5.549	7.113	6.502	6.607	9.128	7.453
Bm284044	0	0	0	0.139	0	0.292	0	0.276	0
Bm280784	0.443	0	0.126	0.964	0.961	0.132	0.612	0.251	0.244
Bm009572	0.491	0.206	0	0	0	0	0	0	0
Bm147937	0.125	0.209	0	0.793	0	0.448	0	0.462	0.4
Bm013409	0.647	0.756	0.629	2.36	0.15	0.166	3.341	0.236	0.152
Bm071708	0	0	0	0.395	0	0.433	0.2	0.411	0.199
Bm268280	0	0	0.141	0.135	0.269	0.148	0.274	0	0
Bm155300	1.102	2.512	1.3	0.508	1.054	0.428	1.191	0.735	0.275
Bm263065	2.543	0	1.883	0	0	0	0	0	0
Bm150647	0	0	0	0	0	0.123	0.682	0	0.339
Bm044649	1	1.675	1.7	1.632	1.626	0.299	1.656	1.983	0.275
Bm244889	0	1.22	0.707	0.849	2.03	0.186	1.378	1.238	0.515
Bm045860	1.443	0.68	1.38	0	0	0	0	0	0
Bm315382	1.099	0.123	0.934	0	0	0.066	0	1.556	0.966
Bm303213	0.298	0	0.126	0	0	0.267	0.37	0.253	0
Bm217614	0	0	0	0	0	0	0.51	0	0
Bm173959	0.677	2.27	1.535	0.737	2.019	0.405	2.43	1.535	0.931
Bm031737	0.355	0.149	0.453	4.924	2.454	2.544	1.322	1.207	1.317
Bm206142	0.102	0	0	0.249	0.661	0.728	0	0.086	0
Bm208662	1.313	0.256	0.908	0	0	0	0	0.697	0.165
Bm129249	0	0	0	0.238	0	0	0	0	0
Bm176312	0.326	0	0.069	0.199	0.132	0.533	0.067	0.208	0.134
Bm278973	0.383	0.321	0.651	0	0	0	0	0	0
Bm046859	0.486	0.271	0	0.264	0.395	0	0	0	0
Bm054681	0	0	0	0.234	0	0.771	0	1.707	0.473
Bm169331	0.399	0.214	0	0	0	0	0	0	0
Bm098647	0.705	0.084	0.428	0	0	0	0	0	0
Bm203546	0	0	0.287	0	0	0	0	0	0
Bm322610	0	0	0	0	0.222	0	0	0	0
Bm164444	1.879	2.777	1.021	0.176	0.186	0	0.123	0.232	0.534
Bm040584	11.677	7.903	10.607	36.423	41.436	38.832	31.436	27.489	28.009
Bm198850	0	0	0	0.417	0.277	0.153	1.058	0.434	0.14
Bm175669	0.517	0	0.33	0	0.105	0	0	0.22	0
Bm194837	0	0	0.239	0.344	0.572	0.126	0.349	0.239	0.348
Bm073386	0	0.459	0	0.536	0	0	0.816	0	0
Bm242642	0	0	0	0.07	0	0	0.06	0	0
Bm182569	0.361	0	0.46	8.156	12.357	10.296	5.595	7.203	6.617
Bm059205	0.198	0	0	0	1.129	0.178	0.164	0.337	0
Bm308000	0.818	1.272	1.255	1.704	0.958	0.829	1.037	0.906	0.496
Bm106980	0.004	0	0	0.004	0.001	0	0.001	0.001	0.001
Bm335252	2.976	1.662	1.265	9.849	8.068	11.852	14.101	9.275	8.181
Bm242119	0	0	0	0.459	1.099	1.11	0	0.574	0.279
Bm336758	9.027	10.349	8.371	6.198	4.011	4.377	4.9	5.742	4.348
Bm020605	4.688	0.944	4.062	0.037	0.11	0.04	0	3.87	3.94
Bm254990	0	0.196	0	0.191	0	0	0.194	0	0
Bm324109	7.233	6.47	7.565	7.889	11.01	9.192	7.68	9.031	5.202
Bm163473	0	0.065	0	0.359	1.113	1.574	1.325	0.694	0
Bm173707	0.148	0.192	0	0.121	0	0.132	0.122	0.628	0.366
Bm044398	0	0.352	0.715	1.944	2.166	0.628	0.696	0.715	0.462
Bm269859	0.333	0	0.172	0	0	0	0.138	0	0.21
Bm172525	0.46	0	1.043	0	0	0	0	0	0
Bm198885	0.172	0.279	0.456	1.555	1.303	1.373	0.679	1.942	0.968
Bm012098	1.121	0	0.52	0	0	0	0	0.087	0
Bm309082	0	0	0	0	0.325	0.239	0.22	0.339	0
Bm284681	0	0	0	0	0.45	0.354	0	0.202	0.065
Bm038399	0	0.252	0.281	0.493	0.342	0.24	1.199	0.167	0.894
Bm050881	3.522	2.815	3.136	9.232	10.157	12.917	6.528	8.702	10.382
Bm182202	2.146	0.291	1.72	0.873	0.505	0.875	2.147	0.879	1.135
Bm210646	1.427	2.018	1.369	0.336	0.446	0.889	0.653	0.492	0.539
Bm283536	0	0	0	0.179	0	0.59	0.272	0.093	0.181
Bm018349	4.527	27.425	3.752	27.244	56.328	40.611	15.461	15.088	19.009
Bm021356	0	0.242	0	0	0	0	0	0.246	0
Bm099959	0.545	0	0.855	0.068	0.034	0	0	0.962	0
Bm136995	0.284	1.547	0.966	0.348	1.617	0.764	1.058	0.362	0
Bm204248	1.108	0.334	0.184	0	0	0	0	0	0
Bm099814	0.995	0	0.033	0.542	0.324	0	0	0.226	0
Bm141249	1.721	2.066	0.844	0.164	0.378	0	0.903	0.887	0.864
Bm047545	3.865	5.615	4.055	3.12	2.842	3.389	2.962	3.949	3.051
Bm235289	1.655	0.411	1.46	0	0	0	0	1.161	1.795
Bm274465	0	0	0	0.293	0.967	0.629	0.448	0.642	0.464
Bm022189	0.216	0	0.073	0.211	0.181	0	0.322	0	0
Bm181172	0	0	0	0.732	1.703	0.536	1.238	1.526	3.207
Bm139080	0.401	0	0	0	0	0.359	0	1.023	0
Bm159188	0.926	0.155	1.102	0	0.301	0.166	0.46	0.472	0.764
Bm051871	0.281	0	0.716	0	0.114	0	0	0	0
Bm001550	0	0	0	0	0	0	0	0	0.193
Bm130804	0	0	0	0.344	0.171	0	0	0	0
Bm196000	1.2	0.335	0.793	0	0	0	0	0.227	0.33
Bm179812	0.092	0	0	0.132	0	0.217	0.182	0.192	0
Bm132426	2.016	0.941	2.727	0.168	0.419	0.275	0.502	1.326	0.311
Bm069453	0.155	0.778	0.263	0	0.126	0.277	0.128	0.395	0.128
Bm023327	0.321	0.537	0.409	0.262	0	0	0	0.409	0.132
Bm290026	2.427	4.667	2.808	3.273	2.703	2.132	3.09	3.634	3.279
Bm226706	7.245	3.608	7.186	35.58	30.004	36.665	25.326	31.573	19.914
Bm127302	0	0	0	0	0	0	0	0.256	0
Bm204166	0	0	0	0	0.216	0	0.22	0.451	0
Bm185573	0	0	0	0.907	0	0	0.307	0	0
Bm299899	0.317	0	0	0	0.258	0	0	0.539	0
Bm039860	0	0	0	0.896	0.248	0	0.253	0.571	0.403
Bm191739	1.089	0.291	0.832	0	0.013	0.014	0	0.805	1.067
Bm193597	0.202	0.542	0.206	0	0	0	0	1.717	1.599
Bm245930	0	0	0	0.608	0	0	1.028	0	0
Bm143508	1.928	1.382	1.629	0.453	0.134	0.144	0.022	0.487	0
Bm175340	0.716	0.36	0.244	4.091	3.611	2.054	1.898	2.435	2.008
Bm105942	0	1.259	0	0.66	0	0	0.727	0	0
Bm252694	0	0	0	0	0.179	0	0.365	0.187	0
Bm022449	0.789	0	1.342	0	0.16	0	0	0	0
Bm096551	0	0.22	0	0.071	0	0	0.434	0	0
Bm073958	0	0.269	0	0.262	0	0	0.265	0	0
Bm103817	1.821	0.461	1.098	0.194	1.066	1.437	0.996	0.969	0.724
Bm153321	8.022	5.382	8.78	2.739	3.782	3.063	3.854	4.317	3.114
Bm155185	29.22	18.391	28.536	25.895	29.181	26.979	21.401	22.953	24.163
Bm262545	1.394	2.111	0.767	1.142	1.372	1.687	1.134	1.723	1.179
Bm306708	0.196	0.823	0.835	0	0	0	0	0	0
Bm182655	0.238	0	0.304	0	0.194	0.213	0	0.101	0
Bm236916	0.409	0.625	2.176	0.981	0.809	0.955	0.902	0	0
Bm076162	0	0	0	0.944	0	0	0	0	0
Bm063498	0.241	0.334	0.544	0.816	0.396	0.584	0.351	0.144	0.576
Bm279813	1.707	0	1.451	0	0.972	1.071	0	1.306	0.985
Bm134364	0	0	0	0	0	0	0.188	0	0
Bm186936	0	0	0.153	0	0.146	0	0	0.306	0
Bm036968	0.384	0.429	0.544	1.986	2.916	2.984	0.318	0.653	0.528
Bm240281	0.177	1.232	0.805	0.313	0.045	0	0.201	0.392	0.52
Bm150797	0	0	0	0	0	0	0.876	0	0
Bm005081	0	0	0	0	0.335	0.185	0.171	0	0
Bm238431	0	1.761	0	1.62	0	0	1.547	0	0
Bm310795	6.019	7.348	6.616	1.877	2.581	1.977	3.623	1.662	3.032
Bm052395	0.425	0	0.362	0	0.346	0.572	0	0	0.175
Bm101499	0.201	1.07	0.503	0	0	0.294	0	0.125	0.178
Bm124066	1.705	0.49	2.593	0	1.177	0	0.623	1.113	0
Bm336443	3.276	0.814	2.289	0	0	0	0	2.286	2.465
Bm326516	39.334	20.573	37.692	12.348	12.201	12.825	9.324	8.002	8.958
Bm259925	0	0.556	0	0.406	0	0	0.137	0	0
Bm255941	0	0	0	0	0	0.327	0.302	0	0
Bm063194	0.236	0.33	0.469	0	0	0.071	0.131	0	0.195
Bm317083	0	0	0	0	0.242	0	0.246	0.253	0.613
Bm093888	0.475	0.47	0.534	0.855	1.522	1.035	1.059	1.867	2.565
Bm305847	4.576	5.203	5.835	4.001	4.785	4.1	4.059	4.167	4.043
Bm257436	0.988	0.373	0.946	0	0.181	0	0.046	0.473	0.642
Bm306261	1.675	5.877	1.008	0	0	0	0.918	1.204	0.925
Bm300790	2.794	2.073	2.121	0.965	0.679	0.744	0.975	1.575	1.075
Bm317834	0.485	0.088	0.46	0	0	0	0	0.595	0.677
Bm083441	0	1.513	0.171	0.327	0	0	0.332	0	0
Bm043950	0.065	0	0.055	4.41	4.766	3.443	4.313	2.933	1.987
Bm059221	0.793	0.166	0.421	0	0	0	0	0	0
Bm007788	0.242	0	1.027	0	0.491	0	0	0	0
Bm020477	0.097	0	0.083	0.397	0.158	0.524	0	0.248	0.402
Bm139160	0	0	0	0.189	0.244	0.139	0.094	0.17	0
Bm238962	0.236	0	1.005	0.965	2.5	1.059	0	0.804	0.585
Bm065444	0	0	0	1.397	0.964	1.416	0.545	0.336	0.434
Bm113134	0.677	0	0.411	0	0	0	0	0.986	0.797
Bm212100	0	0	0	0.698	0.348	0.383	0	0	0
Bm238648	0	0	0	0	0	0.372	0	0.353	0
Bm024436	0.331	0.555	0	0.18	0	0	0.183	0.094	0.273
Bm007514	0	0	0	0	0.487	0	0	0	0
Bm072457	0	0	0	0.29	0	0	0	0.151	0.293
Bm038621	0.92	0.514	0.652	2.101	1.621	2.061	1.778	1.695	1.265
Bm029763	0.431	0.218	0	2.257	0.508	2.393	0.906	1.929	0.366
Bm151618	0	0	0	1.115	1.704	2.286	1.283	0.465	0.827
Bm134344	0	0	0	0.092	0.274	0.101	0.558	0	0.093
Bm308668	0.675	0.339	0.689	0	0	0	0	0	0
Bm024959	0	0	0	0	0.712	0.588	0	0	0
Bm089912	0	0.481	0.209	0.201	0.067	0.074	0.272	0.139	0.068
Bm246353	0.162	0	0.549	0	0.263	0.145	0.268	0.412	0
Bm240825	1.851	0.763	1.34	1.119	1.171	1.29	0.454	1.864	1.131
Bm023821	0	0	0	0.674	0.168	0.185	0.342	0	0.17
[truncated: 223,627 more rows]
