# Supplementary material for: Variability in Leaf Color Induced by Chlorophyll Deficiency: Transcriptional Changes in Bamboo Leaves
Source: Preprints.org preprint supplement (doi:10.20944/preprints202311.0939.v2), 2023-12-27
Supplement: Supplementary file 2 [file supplementary › Table S5.tsv]

Genes	GO_merge
Bm025727	GO:0042981,GO:0007165,GO:0005509,GO:0005515,GO:0005578
Bm071208	GO:0005525
Bm071211	GO:0008652,GO:0055114,GO:0000051,GO:0005525,GO:0046983,GO:0016620,GO:0003942,GO:0005737
Bm309719	GO:0055085,GO:0006810,GO:0005215,GO:0016021,GO:0016020
Bm237022	GO:0046912
Bm238954	GO:0055114,GO:0050660,GO:0016614
Bm299435	GO:0006355,GO:0003700,GO:0003677,GO:0005667,GO:0005634
Bm213456	GO:0007264,GO:0003924,GO:0005525
Bm143282	GO:0003723
Bm143390	GO:0008537
Bm233079	GO:0003676
Bm054152	GO:0006771,GO:0051782,GO:0009432,GO:0019497,GO:0003993,GO:0000287,GO:0008253,GO:0005737,GO:0009276
Bm090378	GO:0006355,GO:0043565,GO:0003700,GO:0005667
Bm056815	GO:0009058,GO:0030170,GO:0008483
Bm199171	GO:0006355,GO:0008270,GO:0043565,GO:0003700,GO:0005667
Bm207449	GO:0009190,GO:0035556,GO:0016849
Bm052025	GO:0051603,GO:0046686,GO:0006511,GO:0004175,GO:0004298,GO:0022626,GO:0005634,GO:0005886,GO:0005839,GO:0019773
Bm329922	GO:0042967,GO:0008080,GO:0016747
Bm299568	GO:0005975,GO:0043169,GO:0004553
Bm113966	GO:0009396,GO:0055114,GO:0046487,GO:0005975,GO:0004553,GO:0004488,GO:0043169,GO:0003824
Bm029349	GO:0046983,GO:0003677
Bm241206	GO:0016310,GO:0016772
Bm090457	GO:0006352,GO:0005669
Bm151418	GO:0006508,GO:0004185
Bm254710	GO:0007275,GO:0030154,GO:0007219,GO:0016021
Bm271384	GO:0006820,GO:0004190,GO:0016021,GO:0005634
Bm029389	GO:0051536,GO:0003824
Bm180083	GO:0016020
Bm007054	GO:0005515,GO:0019031
Bm180048	GO:0000079,GO:0019901
Bm333729	GO:0006508,GO:0004222,GO:0008270
Bm185311	GO:0006633,GO:0055114,GO:0005506,GO:0016491
Bm120989	GO:0016310,GO:0008033,GO:0006109,GO:0000160,GO:0006694,GO:0016114,GO:0009058,GO:0003724,GO:0004672,GO:0000155,GO:0005524,GO:0004161,GO:0016887,GO:0003723,GO:0000166,GO:0009365
Bm148742	GO:0016114,GO:0009058,GO:0008152,GO:0006694,GO:0008033,GO:0004161,GO:0005524,GO:0016301,GO:0043531,GO:0008270,GO:0016887,GO:0003723,GO:0003724,GO:0003676
Bm246638	GO:0006508,GO:0004190
Bm059997	GO:0042254,GO:0006412,GO:0003735,GO:0005840,GO:0005622
Bm320348	GO:0006550,GO:0006568,GO:0006631,GO:0055114,GO:0006552,GO:0018874,GO:0006574,GO:0006633,GO:0006554,GO:0016491,GO:0003857
Bm085683	GO:0006810,GO:0003333,GO:0006865,GO:0055085,GO:0015171,GO:0016020
Bm203402	GO:0010181
Bm276103	GO:0009435,GO:0051539,GO:0008987,GO:0019804
Bm276107	GO:0015986,GO:0015992,GO:0006119,GO:0006486,GO:0046961,GO:0046933,GO:0016757,GO:0045261,GO:0045259
Bm182448	GO:0007165,GO:0005509,GO:0005515,GO:0005578
Bm032807	GO:0003677
Bm108470	GO:0030494,GO:0015979,GO:0005524,GO:0003774,GO:0016459
Bm173293	GO:0005515
Bm273992	GO:0042254,GO:0006412,GO:0003735,GO:0008097,GO:0005840
Bm313997	GO:0005975,GO:0004553
Bm105485	GO:0007157,GO:0009405,GO:0016021
Bm222527	GO:0006090,GO:0016117,GO:0055114,GO:0006099,GO:0004499,GO:0008924,GO:0016705,GO:0050661,GO:0050660,GO:0016491
Bm132691	GO:0006260,GO:0032508,GO:0005524,GO:0003678,GO:0005657
Bm283862	GO:0016020
Bm031774	GO:0006810,GO:0016021
Bm194285	GO:0006139,GO:0006355,GO:0006694,GO:0016114,GO:0009058,GO:0006206,GO:0006281,GO:0002949,GO:0019079,GO:0006310,GO:0009378,GO:0003723,GO:0016740,GO:0008134,GO:0003678,GO:0003724,GO:0098519,GO:0005524,GO:0016301,GO:0004161,GO:0043531,GO:0016887,GO:0004127,GO:0009379,GO:0005657,GO:0005667
Bm279222	GO:0006508,GO:0008234
Bm019058	GO:0006807,GO:0006730,GO:0004089,GO:0008270
Bm230551	GO:0006810,GO:0005622
Bm081576	GO:0006355,GO:0008270,GO:0000981,GO:0005634
Bm261586	GO:0006550,GO:0018144,GO:0006120,GO:0006574,GO:0018874,GO:0006552,GO:0055114,GO:0006744,GO:0006144,GO:0006568,GO:0006631,GO:0015992,GO:0006554,GO:0006814,GO:0006633,GO:0006508,GO:0008137,GO:0016491,GO:0050662,GO:0016740,GO:0003857,GO:0008233,GO:0003968,GO:0046872,GO:0031419,GO:0005198,GO:0008234,GO:0016787,GO:0050661,GO:0016779,GO:0000166,GO:0031379,GO:0019012
Bm171179	GO:0005783,GO:0016021
Bm208012	GO:0008219,GO:0009405,GO:0005576
Bm208011	GO:0006355,GO:0043248,GO:0043565,GO:0003700,GO:0005887,GO:0005783,GO:0005667
Bm173699	GO:0005975,GO:0004553
Bm294239	GO:0007165,GO:0044267,GO:0016853,GO:0016020,GO:0044436,GO:0009507
Bm105035	GO:0055085,GO:0022857,GO:0016021
Bm132443	GO:0006281,GO:0008270
Bm288529	GO:0006807,GO:0016811
Bm022002	GO:0043531
Bm303238	GO:0006364,GO:0032040
Bm188447	GO:0006886,GO:0016192,GO:0006364,GO:0005198,GO:0015066,GO:0005515,GO:0046983,GO:0032040,GO:0030117
Bm029500	GO:0055085,GO:0022857,GO:0016021
Bm298120	GO:0006810,GO:0055085,GO:0005215,GO:0016020,GO:0016021
Bm078784	GO:0051252,GO:0006396,GO:0003723,GO:0003676,GO:0000175,GO:0017048
Bm140057	GO:0009165,GO:0006098,GO:0009116,GO:0006144,GO:0000287,GO:0004749
Bm050679	GO:0005975,GO:0004553
Bm050678	GO:0005975,GO:0004553
Bm077422	GO:0046872
Bm027604	GO:0005515,GO:0016818
Bm143014	GO:0009396,GO:0055114,GO:0046487,GO:0004488,GO:0003824,GO:0005524,GO:0004329,GO:0016021
Bm075714	GO:0009396,GO:0055114,GO:0046487,GO:0004488,GO:0003824,GO:0005524,GO:0004329,GO:0016021
Bm045133	GO:0009396,GO:0046487,GO:0004329,GO:0005524
Bm247441	GO:0046487,GO:0009396,GO:0004329,GO:0005524
Bm044635	GO:0009396,GO:0046487,GO:0005524,GO:0004329
Bm246847	GO:0006568,GO:0006550,GO:0006631,GO:0006552,GO:0055114,GO:0018874,GO:0006574,GO:0006554,GO:0006633,GO:0016491,GO:0003857,GO:0004867,GO:0008641
Bm176438	GO:0006631,GO:0006550,GO:0006568,GO:0006554,GO:0006633,GO:0055114,GO:0006552,GO:0018874,GO:0006574,GO:0008641,GO:0004867,GO:0016491,GO:0003857
Bm081182	GO:0008152,GO:0042381,GO:0016746,GO:0005576
Bm275074	GO:0000160,GO:0005515
Bm088399	GO:0006397,GO:0006470,GO:0004721,GO:0005634
Bm245109	GO:0006886,GO:0006888,GO:0005509,GO:0030127
Bm086671	GO:0055085,GO:0043087,GO:0035023,GO:0006812,GO:0015703,GO:0005089,GO:0008324,GO:0015109,GO:0005886,GO:0016021
Bm185262	GO:0005515,GO:0008270
Bm269464	GO:0016998,GO:0009253,GO:0005975,GO:0003796
Bm069718	GO:0009607,GO:0042254,GO:0055114,GO:0006412,GO:0003735,GO:0003723,GO:0016491,GO:0016021,GO:0005840
Bm268441	GO:0005975,GO:0004553
Bm236650	GO:0009058,GO:0030170
Bm108812	GO:0006351,GO:0003677,GO:0008270,GO:0005634
Bm231294	GO:0055085,GO:0022857,GO:0016021
Bm046232	GO:0006412,GO:0042254,GO:0003735,GO:0005622,GO:0005840
Bm178709	GO:0042254,GO:0006412,GO:0003735,GO:0005840,GO:0005622
Bm328165	GO:0006629
Bm185263	GO:0005975,GO:0004553
Bm028380	GO:0006554,GO:0006479,GO:0018024
Bm234757	GO:0055114,GO:0046872,GO:0016491
Bm273747	GO:0015628,GO:0015031,GO:0015684,GO:0008565,GO:0015093,GO:0003924,GO:0005525,GO:0005524,GO:0016887,GO:0016021,GO:0015627
Bm163183	GO:0009405,GO:0005576
Bm220847	GO:0006270
Bm109855	GO:0046872
Bm109854	GO:0046872
Bm231674	GO:0005975,GO:0030246
Bm037565	GO:0004190,GO:0016021
Bm331522	GO:0006412,GO:0042254,GO:0019843,GO:0003735,GO:0005840
Bm261427	GO:0005094,GO:0005737
Bm190854	GO:0005515
Bm036567	GO:0009607,GO:0006952,GO:0008219,GO:0005516,GO:0016023,GO:0016021
Bm218117	GO:0042546,GO:0005199,GO:0009277,GO:0005618
Bm129906	GO:0006508,GO:0055114,GO:0008152,GO:0016491,GO:0016787,GO:0008236,GO:0005634
Bm302454	GO:0006412,GO:0042254,GO:0003735,GO:0005761,GO:0016021,GO:0005840
Bm175728	GO:0042254,GO:0006412,GO:0003735,GO:0019843,GO:0005840
Bm231920	GO:0006508,GO:0004222,GO:0008270,GO:0031012
Bm231921	GO:0006508,GO:0004222,GO:0008270,GO:0031012
Bm231922	GO:0006508,GO:0004222,GO:0008270,GO:0031012
Bm231924	GO:0006508,GO:0008270,GO:0004222,GO:0031012,GO:0019031
Bm146177	GO:0008152,GO:0000062,GO:0003824
Bm247575	GO:0015886,GO:0015232
Bm072105	GO:0055085,GO:0030001,GO:0046873,GO:0016020
Bm136893	GO:0051082
Bm009685	GO:0005515
Bm086893	GO:0005515,GO:0046872,GO:0061630,GO:0008270
Bm129969	GO:0008654,GO:0006563,GO:0006544,GO:0046486,GO:0006566,GO:0004609
Bm332213	GO:0046332
Bm100587	GO:0006351
Bm069648	GO:0006412,GO:0042254,GO:0003735,GO:0098519,GO:0005622,GO:0005840
Bm162155	GO:0006118,GO:0008152,GO:0055114,GO:0016627,GO:0003995
Bm284986	GO:0006468,GO:0004672,GO:0005524
Bm040580	GO:0006012,GO:0009117,GO:0008108
Bm003487	GO:0005515
Bm211956	GO:0055085,GO:0010508,GO:0007165,GO:0030001,GO:0007186,GO:0046873,GO:0004871,GO:0016020,GO:0005834
Bm234637	GO:0009405,GO:0016020
Bm048341	GO:0016567,GO:0004842
Bm238737	GO:0016021
Bm267498	GO:0006777,GO:0006633,GO:0042967,GO:0008152,GO:0004315,GO:0016747,GO:0051539,GO:0019008,GO:0005835
Bm152753	GO:0006269,GO:0006351,GO:0008270,GO:0004386,GO:0003896,GO:0005730,GO:0005657
Bm190419	GO:0003676,GO:0008270
Bm162224	GO:0006412,GO:0042254,GO:0003735,GO:0015934,GO:0005840,GO:0022626,GO:0016020,GO:0043231
Bm293967	GO:0042254,GO:0042742,GO:0006412,GO:0003735,GO:0005840
Bm142947	GO:0016579,GO:0036459
Bm166963	GO:0045892,GO:0005634
Bm077879	GO:0015940,GO:0055114,GO:0008677
Bm184268	GO:0006508,GO:0004190
Bm284800	GO:0030247
Bm133668	GO:0009790,GO:0006446,GO:0003743,GO:0005852,GO:0005840,GO:0005737
Bm287136	GO:0006810,GO:0006468,GO:0006313,GO:0004803,GO:0004672,GO:0005524,GO:0003677,GO:0015288,GO:0016020
Bm003280	GO:0006886,GO:0005741
Bm181999	GO:0055114,GO:0016491
Bm146743	GO:0006885,GO:0055085,GO:0006816,GO:0006812,GO:0015369,GO:0016021
Bm073118	GO:0042254,GO:0006412,GO:0003735,GO:0005840,GO:0005622
Bm100794	GO:0055114,GO:0008152,GO:0006118,GO:0006366,GO:0003995,GO:0003677,GO:0050660,GO:0016627,GO:0005665
Bm190003	GO:0006122,GO:0005750,GO:0005743
Bm229280	GO:0016020
Bm053583	GO:0006355,GO:0003677
Bm083229	GO:0016032,GO:0042254,GO:0006412,GO:0042967,GO:0003735,GO:0008080,GO:0016747,GO:0005840,GO:0005622
Bm037362	GO:0005515,GO:0008270
Bm253126	GO:0006886,GO:0008643,GO:2001256,GO:0034219,GO:0006605,GO:0015144,GO:0016021,GO:0019867,GO:0030176,GO:0016020
Bm257754	GO:0005975,GO:0004553
Bm289632	GO:0000062
Bm044339	GO:0007264,GO:0006576,GO:0006810,GO:0005525,GO:0005524
Bm312452	GO:0006465,GO:0008233,GO:0005787,GO:0016021
Bm217857	GO:0006555,GO:0006633,GO:0018874,GO:0006574,GO:0006779,GO:0055114,GO:0006552,GO:0006550,GO:0019354,GO:0006730,GO:0006554,GO:0006813,GO:0006520,GO:0006631,GO:0006568,GO:0006547,GO:0043115,GO:0016491,GO:0051287,GO:0003857,GO:0004013,GO:0016153
Bm071912	GO:0006508,GO:0005515,GO:0004185,GO:0005773
Bm276619	GO:0009451,GO:0006400,GO:0008152,GO:0032259,GO:0008033,GO:0008176,GO:0008168
Bm112675	GO:0008152,GO:0006629,GO:0016787
Bm112674	GO:0008152,GO:0016787
Bm212492	GO:0006351,GO:0006206,GO:0006383,GO:0006144,GO:0003899,GO:0003677,GO:0005666,GO:0005730
Bm104028	GO:0042254,GO:0006412,GO:0003723,GO:0003735,GO:0005840,GO:0005622
Bm134461	GO:0006412,GO:0042254,GO:0003723,GO:0003735,GO:0005622,GO:0005618,GO:0005840,GO:0005773,GO:0022627,GO:0005886,GO:0005730
Bm018282	GO:0016310,GO:0007165,GO:0000160,GO:0000155,GO:0009365
Bm033556	GO:0006355,GO:0008270,GO:0000981,GO:0005634
Bm287569	GO:0006260,GO:0009405,GO:0007165,GO:0005509,GO:0004872,GO:0016021
Bm319361	GO:0055085,GO:0016020
Bm174113	GO:0045893,GO:0006950,GO:0008270,GO:0051087,GO:0003677,GO:0001671,GO:0005634
Bm072418	GO:0035091
Bm024504	GO:0007050,GO:0045859,GO:0004861,GO:0005634
Bm070451	GO:0000105
Bm297420	GO:0055085,GO:0016021
Bm238849	GO:0055085,GO:0006810,GO:0005215,GO:0022857,GO:0016021,GO:0016020
Bm142777	GO:0015031,GO:0032065,GO:0006355,GO:0006886,GO:0003677,GO:0005515,GO:0045502,GO:0005543,GO:0042803,GO:0008134,GO:0008565,GO:0005622,GO:0016020,GO:0005737,GO:0030286,GO:0005938,GO:0005667
Bm095172	GO:0008270
Bm099447	GO:0055085,GO:0022857,GO:0016021
Bm160840	GO:0006144,GO:0006508,GO:0004197,GO:0004252,GO:0003968,GO:0070008,GO:0016817,GO:0031379
Bm309891	GO:0009058,GO:0030170
Bm330401	GO:0008061,GO:0032040,GO:0005737
Bm146062	GO:0055114,GO:0006813,GO:0051287,GO:0016616
Bm328420	GO:0055114,GO:0006813,GO:0005198,GO:0016616,GO:0043169,GO:0051287,GO:0016491,GO:0019031
Bm098800	GO:0002949,GO:0006810,GO:0016301,GO:0005524,GO:0003724,GO:0003723,GO:0003774,GO:0016459
Bm241045	GO:0045765,GO:0003676,GO:0019031,GO:0005737
Bm134401	GO:0046983,GO:0005515
Bm151263	GO:0046983,GO:0005515
Bm297470	GO:0006506,GO:0016021
Bm221369	GO:0048544
Bm080043	GO:0006355,GO:0003700,GO:0005667
Bm332549	GO:0016020
Bm098762	GO:0005886,GO:0005794,GO:0009535
Bm271072	GO:0009535,GO:0005886,GO:0005794
Bm141185	GO:0005515,GO:0005509
Bm160562	GO:0008612
Bm024420	GO:0051252,GO:0016567,GO:0016891,GO:0046872,GO:0004842,GO:0005515,GO:0008270,GO:0005680
Bm065664	GO:0055085,GO:0022857,GO:0016021
Bm161823	GO:0016226,GO:0051536,GO:0005737
Bm099626	GO:0000917,GO:0006914,GO:0043093,GO:0005737
Bm049509	GO:0008152,GO:0006694,GO:0016114,GO:0008661,GO:0016624,GO:0016772,GO:0005524
Bm180375	GO:0016020
Bm163027	GO:0055114,GO:0016627
Bm191874	GO:0006928,GO:0005198
Bm140347	GO:0005524,GO:0005515,GO:0016881
Bm238073	GO:0009069,GO:0016310,GO:0004674
Bm163965	GO:0016788
Bm257071	GO:0005975,GO:0004553
Bm173262	GO:0071107
Bm299449	GO:0005509
Bm036507	GO:0005509
Bm114926	GO:0004867,GO:0005576
Bm243879	GO:0006119,GO:0015992,GO:0006118,GO:0008121
Bm172165	GO:0055114,GO:0016616
Bm287885	GO:0055085,GO:0022857,GO:0016021
Bm076063	GO:0008537
Bm101483	GO:0008537
Bm009780	GO:0007165,GO:0005179,GO:0005576
Bm183892	GO:0015979,GO:0055114,GO:0008152,GO:0030145,GO:0016491,GO:0051287,GO:0016021,GO:0009523
Bm086762	GO:0006260,GO:0046872
Bm277181	GO:0006810,GO:0005215,GO:0016020
Bm133405	GO:0006810,GO:0022900,GO:0005215,GO:0016020,GO:0005739,GO:0005747
Bm048824	GO:0003723,GO:0003676,GO:0016021
Bm114674	GO:0007411,GO:0005515
Bm196322	GO:0005975,GO:0004553
Bm137663	GO:0003677,GO:0019013
Bm125566	GO:0008270
Bm076591	GO:0008270
Bm201723	GO:0008270
Bm076593	GO:0008270
Bm126104	GO:0005975,GO:0045493,GO:0005515,GO:0046559,GO:0005576
Bm119672	GO:0006357,GO:0001104,GO:0016592
Bm187626	GO:0008152,GO:0016787
Bm179909	GO:0046486,GO:0008654,GO:0016024,GO:0004605,GO:0016021
Bm032358	GO:0003676
Bm006997	GO:0042254,GO:0001522
Bm132284	GO:0042545,GO:0005982,GO:0005985,GO:0030599,GO:0005618
Bm084700	GO:0006118,GO:0055114,GO:0009496,GO:0051537,GO:0009512,GO:0042651
Bm078701	GO:0009289
Bm108877	GO:0007264,GO:0005525,GO:0005524
Bm167927	GO:0005198,GO:0016787,GO:0005524
Bm022755	GO:0008152,GO:0016746
Bm229646	GO:0000272,GO:0005982,GO:0005985,GO:0016161
Bm032378	GO:0007017,GO:0007018,GO:0003777,GO:0030286,GO:0005874
Bm207983	GO:0008152,GO:0016836,GO:0003824
Bm276726	GO:0007165,GO:0004871,GO:0016021
Bm168486	GO:0006511,GO:0031625
Bm329325	GO:0006810,GO:0000042,GO:0006260,GO:0005515,GO:0008017,GO:0045298,GO:0005886
Bm329326	GO:0000042,GO:0006810,GO:0005515,GO:0005886
Bm227621	GO:0006412,GO:0042254,GO:0003735,GO:0005622,GO:0005840
Bm041437	GO:0006626,GO:0016020,GO:0005740
Bm194177	GO:0006355,GO:0043565,GO:0003700,GO:0005667
Bm242632	GO:0015708
Bm199470	GO:0007264,GO:0006269,GO:0006260,GO:0007186,GO:0006351,GO:0007165,GO:0003677,GO:0000166,GO:0003896,GO:0004871,GO:0008270,GO:0031683,GO:0003924,GO:0005525,GO:0005524,GO:0019001,GO:0005657,GO:0005730
Bm081233	GO:0042254,GO:0006412,GO:0003735,GO:0005840,GO:0005622
Bm081841	GO:0005515
Bm319376	GO:0005982,GO:0009117,GO:0005985,GO:0048040
Bm156869	GO:0015074,GO:0008270,GO:0004527,GO:0003676,GO:0005622
Bm327376	GO:0003333
Bm067643	GO:0015992,GO:0015986,GO:0015078,GO:0000276
Bm201155	GO:0003676
Bm143490	GO:0005515
Bm007924	GO:0008061,GO:0005737
Bm101741	GO:0008270,GO:0003676
Bm016872	GO:0003676
Bm071480	GO:0016758,GO:0005789
Bm090936	GO:0042254,GO:0006412,GO:0016788,GO:0003735,GO:0005840,GO:0005622
Bm206140	GO:0005975,GO:0006810,GO:0004553,GO:0016020
Bm176443	GO:0006144,GO:0006165,GO:0006228,GO:0006206,GO:0006183,GO:0006241,GO:0004550,GO:0043657
Bm276628	GO:0046983
Bm048176	GO:0005515
Bm249905	GO:0050840,GO:0005576
Bm078375	GO:0006012,GO:0005985,GO:0005982,GO:0004564,GO:0004575,GO:0017177
Bm095453	GO:0006508,GO:0008234
Bm153079	GO:0008152,GO:0055114,GO:0006355,GO:0006351,GO:0008270,GO:0003677,GO:0016491,GO:0000981,GO:0005634
Bm265517	GO:0007155
Bm290799	GO:0006355,GO:0003677,GO:0003700,GO:0005622,GO:0005667
Bm135226	GO:0009966,GO:0043666,GO:0004864
Bm129881	GO:0031047,GO:0003676
Bm333658	GO:0000724,GO:0006659,GO:0043066,GO:0043123,GO:0045766
Bm046791	GO:0009403,GO:0016020
Bm130270	GO:0042823,GO:0042819
Bm027602	GO:0008270,GO:0005515
Bm181334	GO:0005515,GO:0016020
Bm309252	GO:0008152,GO:0016836,GO:0003824
Bm261633	GO:0046872
Bm289332	GO:0006118,GO:0046872,GO:0003954,GO:0005739
Bm258685	GO:0005515
Bm289788	GO:0006508,GO:0004252
Bm194916	GO:0006508,GO:0004252
Bm089676	GO:0006412,GO:0042254,GO:0003735,GO:0005622,GO:0005840
Bm137936	GO:0006144,GO:0035556,GO:0046034,GO:0008270,GO:0046872,GO:0004017
Bm063804	GO:0055114,GO:0007423,GO:0016117,GO:0018342,GO:0016310,GO:0008033,GO:0009069,GO:0006468,GO:0006631,GO:0005524,GO:0016491,GO:0008318,GO:0050660,GO:0016705,GO:0071949,GO:0004674,GO:0000287,GO:0050151,GO:0005212
Bm057627	GO:0055114,GO:0005506,GO:0016705,GO:0020037
Bm248229	GO:0006352,GO:0003677,GO:0005669
Bm242515	GO:0003924,GO:0005525
Bm271272	GO:0006508,GO:0045444,GO:0005515
Bm324579	GO:0007186,GO:0007165,GO:0004871,GO:0005834
Bm314768	GO:0006479,GO:0006554,GO:0018024
Bm154964	GO:0000045,GO:0031554,GO:0031556,GO:0005737
Bm069789	GO:0005975,GO:0006950,GO:0004553,GO:0030246,GO:0005576
Bm011913	GO:0006144,GO:0018144,GO:0016818,GO:0005198,GO:0003968,GO:0031379
Bm096439	GO:0016055,GO:0008013,GO:0016342
Bm227886	GO:0036128
Bm227885	GO:0019031,GO:0016021,GO:0005887
Bm073846	GO:0019054,GO:0004857
Bm294457	GO:0008152
Bm294460	GO:0008152
Bm313014	GO:0042254,GO:0006414,GO:0003735,GO:0005840
Bm071731	GO:0000162,GO:0006571,GO:0006418,GO:0006432,GO:0008033,GO:0043039,GO:0009094,GO:0005524,GO:0000287,GO:0004826,GO:0004812,GO:0000049,GO:0009328,GO:0005737
Bm262558	GO:0001671,GO:0051087
Bm035681	GO:0006446,GO:0042254,GO:0006412,GO:0006413,GO:0031369,GO:0003743,GO:0005515,GO:0003735,GO:0005840,GO:0005852
Bm275300	GO:0015992,GO:0006744,GO:0006118,GO:0006120,GO:0006814,GO:0008137,GO:0003954,GO:0005739
Bm043475	GO:0000105,GO:0004424
Bm209960	GO:0055085,GO:0016021
Bm034320	GO:0055114,GO:0020037,GO:0016705,GO:0005506
Bm153674	GO:0046872
Bm322330	GO:0042262
Bm045415	GO:0016757,GO:0030570,GO:0016020
Bm196113	GO:0006274,GO:0003677,GO:0005737
Bm134626	GO:0051252,GO:0006468,GO:0006397,GO:0005524,GO:0004540,GO:0004672
Bm237520	GO:0055114,GO:0005506,GO:0016705,GO:0020037
Bm217699	GO:0048870,GO:0007049,GO:0070206,GO:0006914,GO:0007155,GO:0006355,GO:0043565,GO:0003677,GO:0003700,GO:0031514,GO:0005667,GO:0016021
Bm197498	GO:0006412,GO:0042254,GO:0003735,GO:0016787,GO:0005622,GO:0005840
Bm293949	GO:0005515
Bm131772	GO:0055114,GO:0016491,GO:0016209
Bm067366	GO:0006468,GO:0004672,GO:0005524
Bm202137	GO:0005515
Bm077363	GO:0006511
Bm234646	GO:0005985,GO:0005982,GO:0005978,GO:0004373
Bm328070	GO:0008152,GO:0016491
Bm198064	GO:0015979,GO:0005515,GO:0046872,GO:0003723,GO:0008270,GO:0009539,GO:0009523,GO:0016020
Bm022251	GO:0055114,GO:0050661,GO:0016491,GO:0050660,GO:0004499
Bm216632	GO:0042254,GO:0006412,GO:0006355,GO:0043565,GO:0008270,GO:0003735,GO:0005840,GO:0005622
Bm122968	GO:0008270,GO:0005515
Bm059567	GO:0008652,GO:0008483
Bm036705	GO:0005634
Bm302560	GO:0003676
Bm101135	GO:0006415,GO:0000921,GO:0006606,GO:0048193,GO:0006449,GO:0005201,GO:0005198,GO:0016149,GO:0016020,GO:0005840,GO:0019028,GO:0019031,GO:0005737,GO:0005581,GO:0005578,GO:0018444,GO:0005940,GO:0016021
Bm131504	GO:0048193,GO:0006449,GO:0006606,GO:0000921,GO:0006415,GO:0016149,GO:0005201,GO:0005198,GO:0005940,GO:0016021,GO:0018444,GO:0005578,GO:0005581,GO:0005737,GO:0019031,GO:0019028,GO:0005840,GO:0016020
Bm195775	GO:0006351,GO:0003677,GO:0008270,GO:0005634
Bm252323	GO:0003677,GO:0003676,GO:0008270,GO:0016787,GO:0005524
Bm142221	GO:0051016,GO:0030479
Bm197225	GO:0032780,GO:0042030,GO:0005739
Bm229085	GO:0000902,GO:0006955,GO:0016020
Bm295152	GO:0000398,GO:0003676,GO:0008270,GO:0005681
Bm198059	GO:0003723,GO:0019843,GO:0005622
Bm044961	GO:0006355,GO:0003677
Bm044960	GO:0006355,GO:0003677
Bm051219	GO:0006355,GO:0003677
Bm206864	GO:0006412,GO:0042254,GO:0003735,GO:0005622,GO:0005840,GO:0019867
Bm212255	GO:0006355,GO:0008270,GO:0000981,GO:0005634
Bm081024	GO:0055114,GO:0016616
Bm286879	GO:0055085,GO:0016021
Bm293674	GO:0006914,GO:0006506,GO:0004519,GO:0017176,GO:0051082,GO:0016021
Bm174595	GO:0019013
Bm047792	GO:0032259,GO:0003723,GO:0005845
Bm335672	GO:0015986,GO:0015992,GO:0006119,GO:0046933,GO:0046961,GO:0000275,GO:0045259
Bm288695	GO:0008152
Bm264911	GO:0008152
Bm184936	GO:0042967,GO:0016747,GO:0008080,GO:0019031
Bm255137	GO:0031423
Bm175804	GO:0005515
Bm239627	GO:0042254,GO:0006412,GO:0003735,GO:0005840
Bm285804	GO:0016462,GO:0005509
Bm125639	GO:0005515
Bm219974	GO:0006308,GO:0003676,GO:0004519
Bm104807	GO:0005525
Bm183315	GO:0005515
Bm171994	GO:0050909,GO:0016021
Bm081246	GO:0055085,GO:0016021,GO:0016020
Bm261114	GO:0016787
Bm260601	GO:0003824
Bm310477	GO:0042967,GO:0008080
Bm230138	GO:0008654,GO:0006355,GO:0009395,GO:0046486,GO:0003677,GO:0004143,GO:0016020
Bm251272	GO:0015031,GO:0008565
Bm091133	GO:0019028
Bm001530	GO:0045454,GO:0000398,GO:0055114,GO:0016209,GO:0016491,GO:0005681
Bm070447	GO:0016020
Bm259623	GO:0009231,GO:0009349
Bm046683	GO:0055114,GO:0016705,GO:0005506,GO:0020037
Bm046684	GO:0006508,GO:0004190
Bm189206	GO:0006614,GO:0008312,GO:0005525,GO:0048500,GO:0016021
Bm263889	GO:0055114,GO:0016491,GO:0005507
Bm099527	GO:0055114,GO:0016491,GO:0046983
Bm161038	GO:0003824
Bm161037	GO:0051704,GO:0006812,GO:0048856,GO:0009555,GO:0016043,GO:0044702,GO:0044763,GO:0005488,GO:0015662,GO:0016020
Bm293944	GO:0046872,GO:0000166,GO:0016021
Bm269601	GO:0051082,GO:0031072
Bm122718	GO:0009405,GO:0005576
Bm143272	GO:0007165,GO:0006013,GO:0007186,GO:0007264,GO:0006000,GO:0019001,GO:0004871,GO:0005525,GO:0003924,GO:0005524,GO:0003873,GO:0031683
Bm098177	GO:0046500,GO:0006479,GO:0006464,GO:0004719
Bm105311	GO:0051087
Bm256459	GO:0046034,GO:0015992
Bm085502	GO:0055114,GO:0010309
Bm294507	GO:0042254,GO:0006412,GO:0003735,GO:0005840,GO:0005622
Bm335607	GO:0016042,GO:0015994,GO:0046486,GO:0006629,GO:0015996,GO:0006508,GO:0008152,GO:0016787,GO:0003847,GO:0047746,GO:0008236,GO:0008247
Bm028108	GO:0005515
Bm214229	GO:0048870,GO:0007017,GO:0007018,GO:0008092,GO:0003777,GO:0005524,GO:0008017,GO:0019898,GO:0005874,GO:0031514,GO:0005737,GO:0045298
Bm053998	GO:0005515
Bm220073	GO:0006206,GO:0006351,GO:0006144,GO:0003899,GO:0097159,GO:0003677,GO:0016779,GO:1901363,GO:0005730
Bm033911	GO:0006468,GO:0004672,GO:0005524
Bm033914	GO:0006468,GO:0004672,GO:0005524
Bm173937	GO:0051479,GO:0005515,GO:0050504,GO:0005737
Bm122925	GO:0006351,GO:0046983,GO:0008270,GO:0044451,GO:0055029
Bm288793	GO:0006351,GO:0046983,GO:0005198,GO:0008270,GO:0005882
Bm251333	GO:0005634
Bm108141	GO:0005975,GO:0019439,GO:0004553,GO:0016833
Bm209263	GO:0055114,GO:0005506,GO:0016705,GO:0020037
Bm033764	GO:0015886,GO:0017004,GO:0016021
Bm330218	GO:0006260,GO:0007165,GO:0017111,GO:0003677,GO:0005524,GO:0005179,GO:0005576
Bm210910	GO:0015994,GO:0004408,GO:0005739
Bm061833	GO:0007165,GO:0005515
Bm267172	GO:0016021
Bm236720	GO:0008152,GO:0003824
Bm236744	GO:0008152,GO:0008270,GO:0003824
Bm128064	GO:0045735
Bm051907	GO:0005515
Bm129274	GO:0008152,GO:0003824,GO:0004252,GO:0016021
Bm325879	GO:0019033
Bm003560	GO:0030089
Bm187050	GO:0008013,GO:0016342
Bm080368	GO:0006355,GO:0005515,GO:0003700,GO:0043565,GO:0005667
Bm151537	GO:0046080,GO:0006206,GO:0006807,GO:0009394,GO:0004170,GO:0016787,GO:0008829
Bm323935	GO:0030474,GO:0008608,GO:0006914,GO:0007165,GO:0048309,GO:0006355,GO:0071988,GO:0006412,GO:0030168,GO:0070206,GO:0051258,GO:0042254,GO:0051028,GO:0045502,GO:0003677,GO:0008233,GO:0003735,GO:0043565,GO:0042803,GO:0003723,GO:0003700,GO:0030674,GO:0005102,GO:0003824,GO:0005198,GO:0008134,GO:0030286,GO:0019031,GO:0042729,GO:0005840,GO:0005622,GO:0005667,GO:0072686,GO:0019028,GO:0005577,GO:0005634,GO:…
Bm140395	GO:0055114,GO:0006813,GO:0008209,GO:0008210,GO:0008207,GO:0006694,GO:0016491,GO:0003854,GO:0050662,GO:0003824,GO:0016616
Bm254317	GO:0042254,GO:0006412,GO:0003735,GO:0005840,GO:0005622
Bm275724	GO:0007050,GO:0045859,GO:0000122,GO:0017069,GO:0004861,GO:0005634,GO:0005737
Bm129251	GO:0006886,GO:0005047,GO:0003924,GO:0005525,GO:0005785,GO:0005786
Bm253142	GO:0016055,GO:0008013,GO:0016342
Bm126149	GO:0006097,GO:0009405,GO:0019752,GO:0005515,GO:0004451,GO:0005576
Bm045909	GO:0006355,GO:0003677,GO:0005634
Bm050330	GO:0006397,GO:0003723,GO:0005634,GO:0005737
Bm087060	GO:0006479,GO:0006464,GO:0008152,GO:0046500,GO:0008171,GO:0008168,GO:0004719
Bm142563	GO:0006457,GO:0046686,GO:0051082,GO:0005524,GO:0005737
Bm291053	GO:0045995,GO:0019069,GO:0015992,GO:0000921,GO:0000917,GO:0030334,GO:0071816,GO:0006457,GO:0006308,GO:0010508,GO:0043093,GO:0015991,GO:0006914,GO:0030155,GO:0007165,GO:0000774,GO:0005102,GO:0051087,GO:0042803,GO:0008855,GO:0005198,GO:0051082,GO:0015078,GO:0009318,GO:0005737,GO:0033179,GO:0005882,GO:0005940,GO:0016021
Bm104378	GO:0055085,GO:0016021
Bm165970	GO:0042254,GO:0006412,GO:0003735,GO:0005840,GO:0005622
Bm161224	GO:0032259,GO:0008152,GO:0008168
Bm155385	GO:0008152,GO:0008168
Bm312037	GO:0007283,GO:0003677,GO:0005634,GO:0000786
Bm143755	GO:0007631,GO:0007218
Bm174500	GO:0042254,GO:0006412,GO:0003735,GO:0005840
Bm312649	GO:0006464,GO:0061630,GO:0031072,GO:0016151,GO:0051082
Bm016525	GO:0009767,GO:0019684,GO:0016168,GO:0009521,GO:0016020
Bm034813	GO:0019028
Bm188182	GO:0005515,GO:0005615
Bm204568	GO:0046872,GO:0008270,GO:0003677
Bm112277	GO:0006554,GO:0008152,GO:0009396,GO:0006694,GO:0006631,GO:0006568,GO:0008210,GO:0006633,GO:0008209,GO:0046487,GO:0055114,GO:0006552,GO:0018874,GO:0006574,GO:0006550,GO:0008207,GO:0010181,GO:0003854,GO:0003857,GO:0050662,GO:0016491,GO:0003824,GO:0016616,GO:0004488
Bm230755	GO:0006508,GO:0004252
Bm024150	GO:0005576
Bm162988	GO:1901363,GO:0097159
Bm156838	GO:0006486,GO:0008378,GO:0016757,GO:0016020
Bm060109	GO:0007605
Bm259202	GO:0015948,GO:0000746,GO:0046656,GO:0030269,GO:0016020,GO:0019867
Bm218271	GO:0009058,GO:0005515
Bm031713	GO:0006144,GO:0006206,GO:0006351,GO:0003677,GO:0003899,GO:0005730
Bm031714	GO:0042254,GO:0006412,GO:0003735,GO:0005840,GO:0005622
Bm210247	GO:0006729,GO:0008124
Bm173386	GO:0006511,GO:0006412,GO:0042254,GO:0003735,GO:0005622,GO:0005840
Bm037979	GO:0006122,GO:0005750
Bm161217	GO:0006099,GO:0016829
Bm017723	GO:0005544,GO:0005509
Bm068334	GO:0006260,GO:0006351,GO:0003887,GO:0046935,GO:0003677,GO:0019031,GO:0005944,GO:0042575
Bm128441	GO:0006270,GO:0019013
Bm097852	GO:0043248,GO:0042254,GO:0003723,GO:0005730,GO:0030529
Bm167232	GO:0005515
Bm155083	GO:0006351,GO:0008270,GO:0003677,GO:0005634
Bm100194	GO:0019062,GO:0055114,GO:0016209,GO:0016491,GO:0019028
Bm069353	GO:0006118,GO:0055114,GO:0003995
Bm291838	GO:0008152,GO:0055114,GO:0016627,GO:1901363,GO:0097159
Bm255661	GO:0006468,GO:0005524,GO:0004672
Bm000124	GO:0046813,GO:0061025,GO:0019031,GO:0016021
Bm002339	GO:0015684,GO:0005525,GO:0003924,GO:0015093,GO:0016021
Bm176824	GO:0006357,GO:0001104,GO:0016592
Bm155747	GO:0005515
Bm169574	GO:0019069,GO:0042025
Bm028061	GO:0015992,GO:0006123,GO:0004129,GO:0045277,GO:0005746
Bm303728	GO:0007218,GO:0043130
Bm157577	GO:0016579,GO:0036459
Bm151050	GO:0030976,GO:0003824
Bm235868	GO:0008270,GO:0003676
Bm002651	GO:0006412,GO:0042254,GO:0003735,GO:0005622,GO:0005840
Bm113384	GO:0009451,GO:0006370,GO:0005524,GO:0004484,GO:0004482,GO:0019028
Bm319025	GO:0006412,GO:0042254,GO:0003735,GO:0005622,GO:0005840
Bm295611	GO:0005515
Bm045695	GO:0055114,GO:0016491,GO:0005507
Bm061701	GO:0005515,GO:0005737,GO:0016021
Bm298450	GO:0005515
Bm076306	GO:0006031,GO:0004100
Bm079891	GO:0006364
Bm304829	GO:0006270
Bm104169	GO:0006144,GO:0006206,GO:0006351,GO:0046983,GO:0003899,GO:0005730
Bm137578	GO:0016020
Bm296014	GO:0006571,GO:0000162,GO:0006096,GO:0006094,GO:0009094,GO:0000287,GO:0004634,GO:0000015
Bm083341	GO:0006810,GO:0003333,GO:0006865,GO:0055085,GO:0015171,GO:0016020
Bm199111	GO:0006865,GO:0055085,GO:0006810,GO:0003333,GO:0015171,GO:0016020
Bm305637	GO:0003677,GO:0008270,GO:0005634,GO:0016021
Bm249502	GO:0016020
Bm123887	GO:0042381,GO:0006031,GO:0004100,GO:0005576
Bm223866	GO:0008152,GO:0008168,GO:0005198,GO:0019028
Bm174473	GO:0019722
Bm325436	GO:0015992,GO:0006119,GO:0015986,GO:0046961,GO:0046933,GO:0045259,GO:0045261
Bm328777	GO:0006810,GO:0055085,GO:0016020,GO:0016021
Bm233533	GO:0046983
Bm096147	GO:0009059,GO:0030176,GO:0005887
Bm223953	GO:0006367,GO:0005672
Bm257819	GO:0004859,GO:0005576
Bm200792	GO:0004859,GO:0005576
Bm330726	GO:0055114,GO:0016616
Bm146221	GO:0007165,GO:0005509,GO:0005578
Bm302999	GO:0006396,GO:0005730
Bm172486	GO:0030170
Bm048130	GO:0006357,GO:0001104,GO:0016592,GO:0005789
Bm198901	GO:0006468,GO:0016773,GO:0005524,GO:0004672,GO:0016020
Bm296990	GO:0042254,GO:0006412,GO:0003723,GO:0003735,GO:0005840,GO:0005622
Bm020325	GO:0003779
Bm208945	GO:0007049,GO:0008608,GO:0005876,GO:0042729
Bm060804	GO:0042254,GO:0006412,GO:0003735,GO:0005840
Bm180076	GO:0055085,GO:0006810,GO:0005524,GO:0042626,GO:0004386,GO:0016021
Bm176101	GO:0006355,GO:0006725,GO:0004497
Bm230122	GO:0006397,GO:0005515,GO:0005634
Bm190023	GO:0055085,GO:0016021
Bm172404	GO:0006355,GO:0008270,GO:0000981,GO:0005634,GO:0019028
Bm096325	GO:0006098,GO:0055114,GO:0019521,GO:0015940,GO:0004616,GO:0008677
Bm191133	GO:0006355,GO:0006351,GO:0006457,GO:0051087,GO:0000981,GO:0042803,GO:0000774,GO:0008270,GO:0003677,GO:0005634
Bm284792	GO:0051726,GO:0006974
Bm009399	GO:0055114,GO:0016491
Bm195181	GO:0003676,GO:0008270
Bm193843	GO:0006810,GO:0015986,GO:0042626,GO:0033178
Bm309110	GO:0003824
Bm110090	GO:0007021,GO:0015631,GO:0051082,GO:0045298
Bm092362	GO:0006468,GO:0005524,GO:0004672,GO:0016740
Bm044008	GO:0006118,GO:0015992,GO:0006119,GO:0055114,GO:0051537,GO:0008121,GO:0016491
Bm035514	GO:0004190,GO:0016021
Bm076586	GO:0005515
Bm015740	GO:0005524,GO:0016887
Bm324546	GO:0006468,GO:0005524,GO:0004672,GO:0016773,GO:0016020
Bm074006	GO:0019031
Bm042642	GO:0005887
Bm095373	GO:0005515
Bm234524	GO:0055114,GO:0046872,GO:0016491
Bm061595	GO:0006376,GO:0042254,GO:0006412,GO:0003735,GO:0003729,GO:0005840,GO:0005685,GO:0005622
Bm080587	GO:0006352,GO:0006355,GO:0003677,GO:0016987,GO:0003700,GO:0005667
Bm265968	GO:0003676
Bm271164	GO:0016021
Bm129923	GO:0005515
Bm003470	GO:0006355,GO:0001104,GO:0016592
Bm028218	GO:0015979,GO:0016020,GO:0009523
Bm007772	GO:0008608,GO:0042729,GO:0072686
Bm205803	GO:0006576,GO:0007264,GO:0007186,GO:0007165,GO:0015684,GO:0004871,GO:0019001,GO:0015093,GO:0031683,GO:0016887,GO:0005524,GO:0003924,GO:0005525,GO:0016021
Bm230667	GO:0006308,GO:0019072,GO:0008855,GO:0042025,GO:0009318
Bm167063	GO:0055085,GO:0016021
Bm018576	GO:0006118,GO:0048868,GO:0051536,GO:0009055,GO:0046872,GO:0051537
Bm301246	GO:0006812,GO:0008324
Bm204494	GO:0006468,GO:0005524,GO:0004672
Bm053791	GO:0006511,GO:0001522,GO:0009451,GO:0003723,GO:0009982
Bm053612	GO:0006570,GO:0006470,GO:0004725,GO:0008138
Bm328423	GO:0006810,GO:0005215,GO:0016020
Bm177999	GO:0006811,GO:0055085,GO:0005216,GO:0016020
Bm178000	GO:0006811,GO:0055085,GO:0005216,GO:0016020
Bm324202	GO:0030001,GO:0000166,GO:0046872
Bm234595	GO:0044237,GO:0016301,GO:0005524
Bm116546	GO:0005515,GO:0005488
Bm278123	GO:0007049,GO:0007067,GO:0006397,GO:0005634,GO:0000775
Bm048475	GO:0006687,GO:0009058,GO:0006468,GO:0001733,GO:0005524,GO:0004672,GO:0016021,GO:0005794
Bm168119	GO:0016020
Bm010411	GO:0003824
Bm078292	GO:0050896,GO:0006351,GO:0003677,GO:0005515,GO:0044464,GO:0005634
Bm039328	GO:0009086,GO:0003871,GO:0017176,GO:0008270
Bm332598	GO:0006510,GO:0006412,GO:0042254,GO:0006508,GO:0003735,GO:0070011,GO:0004176,GO:0005622,GO:0005840
Bm210903	GO:0006468,GO:0005524,GO:0004672,GO:0003779
Bm141305	GO:0008233
Bm100730	GO:0005515,GO:0005737
Bm071446	GO:0046872,GO:0045202
Bm050108	GO:0005515
Bm005361	GO:0003676,GO:0008270,GO:0046872
Bm049716	GO:0006629
Bm122803	GO:0006629
Bm033740	GO:0017004,GO:0020037
Bm283205	GO:0071107,GO:0007155,GO:0055085,GO:0001503,GO:0030001,GO:0046873,GO:0003677,GO:0008270,GO:0005789,GO:0019031,GO:0016020,GO:0005634
Bm202744	GO:0061630
Bm191143	GO:0006260,GO:0006355,GO:0003677,GO:0043565,GO:0003887,GO:0003700,GO:0042575,GO:0005667
Bm295403	GO:0006013,GO:0006020,GO:0006096,GO:0015976,GO:0006094,GO:0006098,GO:0006000,GO:0004332
Bm323259	GO:0005515
Bm150039	GO:0005524
Bm005195	GO:0048193,GO:0070273
Bm141607	GO:0005576
Bm042670	GO:0016020
Bm069226	GO:0008152,GO:0003824
Bm035839	GO:0055114,GO:0007050
Bm099707	GO:0055114,GO:0008209,GO:0008210,GO:0008207,GO:0006694,GO:0003854,GO:0050662,GO:0098599,GO:0003824,GO:0016616
Bm249989	GO:0006260,GO:0003677,GO:0003887,GO:0009360,GO:0042575
Bm000701	GO:0016055,GO:0008013,GO:0016342
Bm126967	GO:0046872
Bm061711	GO:0016887,GO:0005524
Bm278094	GO:0005524
Bm030656	GO:0008270
Bm030655	GO:0003676
Bm259376	GO:0016627
Bm188071	GO:0043087,GO:0005089
Bm154909	GO:0019049,GO:0006468,GO:0016773,GO:0005524,GO:0004672,GO:0016020
Bm061836	GO:0015986,GO:0006950,GO:0015992,GO:0007224,GO:0009415,GO:0015078,GO:0045263
Bm105997	GO:0006464,GO:0031072,GO:0016151,GO:0051082
Bm228749	GO:0006355,GO:0003677
Bm135399	GO:0030001,GO:0055085,GO:0046873,GO:0016020
Bm027055	GO:0055114,GO:0016491,GO:0005509,GO:0009536
Bm050941	GO:0055114,GO:0016117,GO:0016705,GO:0016491,GO:0016872,GO:0009536
Bm237278	GO:0019058,GO:0019031
Bm107254	GO:0006412,GO:0042254,GO:0003735,GO:0005840
Bm213332	GO:0005515,GO:0005886
Bm018483	GO:0016787
Bm077796	GO:0016758,GO:0005789
Bm227160	GO:0006810,GO:0005215,GO:0016020
Bm080945	GO:0006310
Bm038130	GO:0016021
Bm316782	GO:0015996,GO:0015994,GO:0006508,GO:0008152,GO:0047746,GO:0016787,GO:0008236
Bm130238	GO:0006811,GO:0022857,GO:0016787,GO:0005488
Bm260127	GO:0042254,GO:0006412,GO:0009401,GO:0008643,GO:0008982,GO:0003723,GO:0003735,GO:0009357,GO:0005840,GO:0005622,GO:0005737
Bm178721	GO:0031966
Bm285422	GO:0006355,GO:0008270,GO:0003677,GO:0046872,GO:0046332
Bm220568	GO:0003677
Bm181436	GO:0050832,GO:0042742
Bm126319	GO:0005509
Bm052665	GO:0001558,GO:0005520,GO:0008270,GO:0005576,GO:0016942
Bm189911	GO:0007264,GO:0015684,GO:0015093,GO:0005525,GO:0016021
Bm312179	GO:0006725,GO:0055114,GO:0003824,GO:0008199,GO:0005525
Bm312176	GO:0016055,GO:0008013,GO:0005525,GO:0016342
Bm134290	GO:0006508,GO:0006510,GO:0004176
Bm314027	GO:0005524,GO:0003676
Bm066427	GO:0006810,GO:0016021,GO:0016020
Bm217460	GO:0005975,GO:0016773
Bm306961	GO:0006355,GO:0043565
Bm257554	GO:0007586,GO:0016042,GO:0008047,GO:0005576
Bm323291	GO:0006814,GO:0015813,GO:0015846,GO:0015501,GO:0016021,GO:0016020
Bm037933	GO:0006508
Bm043516	GO:0006744,GO:0015992,GO:0006120,GO:0055114,GO:0006814,GO:0008137
Bm121644	GO:0006487,GO:0008250,GO:0016021
Bm308292	GO:0007165,GO:0005179,GO:0005576
Bm019813	GO:0006811,GO:0008270,GO:0016020
Bm069785	GO:0006355,GO:0003682,GO:0003677,GO:0005634,GO:0000775,GO:0000785
Bm208805	GO:0005515
Bm130878	GO:0015684,GO:0007264,GO:0003924,GO:0005525,GO:0005524,GO:0016887,GO:0015093,GO:0016021
Bm282044	GO:0003723
Bm198597	GO:0042254,GO:0006412,GO:0003735,GO:0005840,GO:0005622
Bm289075	GO:0016491
Bm241819	GO:0003676
Bm335135	GO:0007010,GO:0006397,GO:0003723,GO:0003779,GO:0005634,GO:0005737
Bm209805	GO:0042254,GO:0006412,GO:0003735,GO:0005840,GO:0005622
Bm072452	GO:0005975,GO:0008061,GO:0004553
Bm009271	GO:0006265,GO:0006351,GO:0006206,GO:0006144,GO:0003899,GO:0003916,GO:0003677,GO:0005730,GO:0005694
Bm314986	GO:0006629
Bm101208	GO:0061630
Bm086739	GO:0006457,GO:0006950,GO:0051082,GO:0005524
Bm135652	GO:0042742
Bm201386	GO:0055114,GO:0006118,GO:0009916
Bm050842	GO:0008270,GO:0004867,GO:0003676
Bm281820	GO:0003924,GO:0046872,GO:0005525,GO:0045202
Bm046571	GO:0046872,GO:0003924,GO:0005525,GO:0045202
Bm303896	GO:0006367,GO:0005669
Bm242689	GO:0016020
Bm277266	GO:0008152,GO:0006000,GO:0006096,GO:0015976,GO:0007094,GO:0006094,GO:0046486,GO:0006020,GO:0006013,GO:0004807
Bm085613	GO:0042254,GO:0005622
Bm045080	GO:0015074
Bm270499	GO:0007264,GO:0005525,GO:0000166
Bm218994	GO:0006260,GO:0006355,GO:0006914,GO:0007049,GO:0003700,GO:0003677,GO:0043565,GO:0005667,GO:0005634
Bm092130	GO:0030529,GO:0005737
Bm088797	GO:0006412,GO:0042254,GO:0003735,GO:0005622,GO:0005840
Bm004435	GO:0006030,GO:0008061,GO:0005576
Bm045655	GO:0019236,GO:0007186,GO:0016021
Bm037405	GO:0006850,GO:0005743
Bm051495	GO:0006810,GO:0006355,GO:0003700,GO:0042025,GO:0016021,GO:0005667
Bm108991	GO:0022904,GO:0016651,GO:0005743
Bm094056	GO:0005975,GO:0016773,GO:0005524
Bm064427	GO:0006281,GO:0051382,GO:0055114,GO:0005506,GO:0016705,GO:0020037
Bm299656	GO:0006571,GO:0000162,GO:0009073,GO:0009094,GO:0007218,GO:0004107,GO:0005185,GO:0005576,GO:0005747,GO:0005739
Bm195590	GO:0006457
Bm129120	GO:0055085,GO:0007411,GO:0022857,GO:0016021
Bm066913	GO:0006633,GO:0008209,GO:0006552,GO:0046487,GO:0055114,GO:0006574,GO:0018874,GO:0008207,GO:0006550,GO:0006554,GO:0008152,GO:0009396,GO:0006631,GO:0006694,GO:0006568,GO:0008210,GO:0016491,GO:0003824,GO:0016616,GO:0004488,GO:0051287,GO:0003857,GO:0003854
Bm156083	GO:0005975,GO:0004553,GO:0030246
Bm137247	GO:0015074,GO:0055114,GO:0006508,GO:0006278,GO:0004190,GO:0003964,GO:0016706,GO:0031418,GO:0005506,GO:0003723,GO:0005634
Bm195910	GO:0004222
Bm175065	GO:0006355,GO:0003677
Bm283731	GO:0003824,GO:0030976,GO:0000287
Bm203336	GO:0008299,GO:0009234
Bm258960	GO:0007186,GO:0004930,GO:0016021
Bm108997	GO:0007155,GO:0003779,GO:0051015
Bm203540	GO:0006355,GO:0010047,GO:0009809,GO:0009834,GO:0009901,GO:0045893,GO:0003677
Bm288267	GO:0006850,GO:0016301,GO:0005524,GO:0005743
Bm208833	GO:0008152,GO:0003824
Bm078929	GO:0006812,GO:0055085,GO:0006885,GO:0007010,GO:0015299,GO:0016817,GO:0003779,GO:0016021
Bm029581	GO:0005515
Bm258073	GO:0003824
Bm126544	GO:0005975,GO:0004553
Bm304830	GO:0005975,GO:0004553
Bm120536	GO:0030170
Bm330634	GO:0003824
Bm212395	GO:0006355,GO:0003700,GO:0008270,GO:0043565,GO:0003824,GO:0005667
Bm027818	GO:0008210,GO:0006694,GO:0008152,GO:0008207,GO:0009089,GO:0055114,GO:0009085,GO:0008209,GO:0050662,GO:0003854,GO:0051287,GO:0016616,GO:0003824,GO:0008839,GO:0016491,GO:0016620
Bm314985	GO:0006144,GO:0006270,GO:0006858,GO:0006351,GO:0006383,GO:0006206,GO:0046983,GO:0004190,GO:0003677,GO:0003899,GO:0005666,GO:0005730,GO:0016021
Bm077647	GO:0009647,GO:0001578,GO:0009966,GO:0006468,GO:0048513,GO:0009742,GO:0009069,GO:0016310,GO:0032989,GO:0007165,GO:0009908,GO:0009729,GO:0048646,GO:0004903,GO:0005515,GO:0046983,GO:0004674,GO:0005524,GO:0005576,GO:0016023
Bm077648	GO:0005515
Bm131692	GO:0006935,GO:0007165,GO:0004888,GO:0016020
Bm077643	GO:0006468,GO:0005524,GO:0005515,GO:0004672
Bm158214	GO:0006468,GO:0004672,GO:0005524,GO:0016773,GO:0016020
Bm007687	GO:0008270
Bm307376	GO:0016042
Bm271473	GO:0006821
Bm131604	GO:0007165,GO:0000160,GO:0004871
Bm107409	GO:0006281,GO:0006310,GO:0006807,GO:0055114,GO:0003824,GO:0009378,GO:0018580,GO:0016491,GO:0005524,GO:0009379,GO:0005657
Bm267542	GO:0005975,GO:0006072,GO:0046486,GO:0046168,GO:0006355,GO:0055114,GO:0016616,GO:0003700,GO:0051287,GO:0004367,GO:0009331,GO:0005667
Bm311449	GO:0006464,GO:0005515,GO:0061630,GO:0008270,GO:0031072,GO:0016151,GO:0051082
Bm100825	GO:0005515
Bm098499	GO:0030414,GO:0005576
Bm120529	GO:0032259,GO:0008168
Bm290191	GO:0006479,GO:0055114,GO:0006508,GO:0006554,GO:0015948,GO:0004222,GO:0008237,GO:0018024
Bm153208	GO:0008152,GO:0016846
Bm003263	GO:0045454,GO:0016491
Bm116989	GO:0005488
Bm240073	GO:0015979,GO:0010207
Bm262540	GO:0055085,GO:0016021
Bm057525	GO:0006118,GO:0051536,GO:0009055,GO:0005886
Bm227148	GO:0006355,GO:0003700,GO:0043565,GO:0005667,GO:0005634
Bm335181	GO:0006355,GO:0003700,GO:0043565,GO:0005667,GO:0005634
Bm316722	GO:0016310,GO:0015976,GO:0006096,GO:0006094,GO:0004618
Bm188723	GO:0006276
Bm051421	GO:0003676
Bm027575	GO:0008152,GO:0098519,GO:0003824
Bm248987	GO:0016021
Bm296514	GO:0005515
Bm016412	GO:0006525,GO:0006560,GO:0006597,GO:0008295,GO:0004014
Bm003886	GO:0006525,GO:0006560,GO:0006597,GO:0008295,GO:0004014
Bm320938	GO:0008063,GO:0003676
Bm254453	GO:0006446,GO:0003743,GO:0005840,GO:0005737,GO:0005852
Bm215211	GO:0015992,GO:0006119,GO:0015986,GO:0046961,GO:0046933,GO:0045259,GO:0045261
Bm239689	GO:0008152,GO:0016491
Bm313658	GO:0006308,GO:0006310,GO:0008152,GO:0006281,GO:0016491,GO:0004520
Bm301252	GO:0019083
Bm092806	GO:0006368,GO:0008643,GO:0008982,GO:0009357,GO:0008023
Bm074521	GO:0005975,GO:0004553
Bm333307	GO:0016567,GO:0021987,GO:0046872,GO:0004842
Bm177049	GO:0019236,GO:0007606,GO:0007186,GO:0004932,GO:0016021
Bm174182	GO:0042254,GO:0006412,GO:0003735,GO:0005840,GO:0005622
Bm309799	GO:0007264,GO:0006614,GO:0006576,GO:0003677,GO:0016887,GO:0000166,GO:0003924,GO:0005525,GO:0005524
Bm061091	GO:0008152,GO:0003824,GO:0016836
Bm058444	GO:0006563,GO:0006566,GO:0046653,GO:0006544,GO:0008115
Bm332951	GO:0006308,GO:0000077,GO:0003676,GO:0004519
Bm268480	GO:0055114,GO:0050660,GO:0016491
Bm021219	GO:0006123,GO:0015992,GO:0004129,GO:0045277,GO:0005739
Bm028466	GO:0006355,GO:0006352,GO:0003700,GO:0003677,GO:0016987,GO:0043565,GO:0005667
Bm185449	GO:0015940,GO:0000287,GO:0008897
Bm165935	GO:0042254,GO:0006412,GO:0003735,GO:0046983,GO:0008270,GO:0005840,GO:0005622
Bm065828	GO:0007275,GO:0006511,GO:0005515,GO:0008270,GO:0005634
Bm140444	GO:0006582,GO:0030411
Bm193366	GO:0016747
Bm196552	GO:0016747
Bm196553	GO:0016747
Bm196547	GO:0042967,GO:0008811,GO:0016747
Bm115659	GO:0016740
Bm010828	GO:0035999,GO:0006545,GO:0006563,GO:0030170,GO:0016740,GO:0004372,GO:0005737
Bm010830	GO:0016740
Bm106941	GO:0015031,GO:0006886,GO:0008277,GO:0008565,GO:0016021
Bm006190	GO:0055114,GO:0005506,GO:0016705,GO:0020037
Bm334589	GO:0006355,GO:0003700,GO:0003677,GO:0005667
Bm314591	GO:0016021
Bm205120	GO:0016310,GO:0003676,GO:0008270,GO:0046872,GO:0016301
Bm074526	GO:0000154,GO:0006364,GO:0009405,GO:0006396,GO:0016310,GO:0008270,GO:0016301,GO:0003676,GO:0008990,GO:0046872
Bm139656	GO:0000160,GO:0008152,GO:0006457,GO:0000156,GO:0003677,GO:0016597,GO:0005524,GO:0051082,GO:0005737
Bm040641	GO:0006886,GO:0005741
Bm091628	GO:0006487,GO:0003830,GO:0016020
Bm287723	GO:0051726,GO:0005634
Bm217469	GO:0000160
Bm030835	GO:0042967,GO:0006633,GO:0004315,GO:0005835
Bm131858	GO:0050832,GO:0042742,GO:0005198,GO:0019028
Bm295618	GO:0016021
Bm221444	GO:0005515
Bm268655	GO:0016747
Bm047434	GO:0016747
Bm047377	GO:0016747
Bm082817	GO:0005975,GO:0004553
Bm032796	GO:0055114,GO:0051287
Bm004601	GO:0006508,GO:0008234,GO:0003824
Bm112723	GO:0009058,GO:0030170,GO:0005886
Bm016671	GO:0006260,GO:0003677,GO:0005664
Bm206437	GO:0006468,GO:0004672,GO:0005524,GO:0016773,GO:0016020
Bm126606	GO:0005887
Bm313150	GO:0030163
Bm009030	GO:0042254,GO:0006412,GO:0003735,GO:0005840
Bm294023	GO:0008152,GO:0005976,GO:0016491,GO:0016779
Bm213745	GO:0010053,GO:0006355,GO:0009932,GO:0005094,GO:0003700,GO:0016020,GO:0005737,GO:0005667
Bm027554	GO:0055114,GO:0003885,GO:0016020
Bm135737	GO:0006355,GO:0045122,GO:0030674,GO:0003677,GO:0042802,GO:0043130,GO:0008092,GO:0005634
Bm144352	GO:0030674,GO:0008092,GO:0005515,GO:0043130,GO:0042802
Bm218487	GO:0008033,GO:0015940,GO:0006550,GO:0006633,GO:0016117,GO:0055114,GO:0006552,GO:0018874,GO:0006574,GO:0006779,GO:0006694,GO:0006631,GO:0006568,GO:0006554,GO:0019354,GO:0016114,GO:0016705,GO:0071949,GO:0050660,GO:0043115,GO:0008677,GO:0016491,GO:0004506,GO:0003857,GO:0016021
Bm082740	GO:0006457,GO:0006950,GO:0051082,GO:0005524
Bm305179	GO:0006886
Bm030578	GO:0000002,GO:0008168
Bm081940	GO:0006367,GO:0005975,GO:0004553,GO:0005672
Bm081939	GO:0005975,GO:0004553
Bm198122	GO:0008152,GO:0016757
Bm084975	GO:0008152,GO:0016757
Bm032831	GO:0006355,GO:0008152,GO:0006464,GO:0006206,GO:0006351,GO:0006144,GO:0016757,GO:0016787,GO:0016846,GO:0003677,GO:0046983,GO:0016151,GO:0046872,GO:0003899,GO:0008270,GO:0005730,GO:0005634
Bm329787	GO:0016829,GO:0003779,GO:0005622
Bm150556	GO:0005515
Bm118596	GO:0008152,GO:0034599,GO:0003824,GO:0005789
Bm118597	GO:0016032,GO:0019012
Bm017566	GO:0032465,GO:0016567,GO:0006915,GO:0005515,GO:0004842
Bm112549	GO:0006471,GO:0003956
Bm188750	GO:0046486,GO:0043065,GO:0007205,GO:0009395,GO:0004143,GO:0005737
Bm053215	GO:0046486,GO:0007205,GO:0043065,GO:0009395,GO:0004143,GO:0005737
Bm014321	GO:0007205,GO:0046486,GO:0009395,GO:0004143
Bm335494	GO:0009395,GO:0007205,GO:0046486,GO:0004143
Bm188748	GO:0015016,GO:0016787
Bm238272	GO:0005515
Bm334063	GO:0005622
Bm056262	GO:0006807,GO:0006537,GO:0055114,GO:0016491,GO:0003824,GO:0016627,GO:0015930,GO:0016638,GO:0018580,GO:0005737
Bm055528	GO:0015992,GO:0006123,GO:0004129,GO:0045277
Bm125445	GO:0005515
Bm242058	GO:0035429,GO:0015725,GO:0015128,GO:0016020
Bm052697	GO:0051603,GO:0004298,GO:0005839
Bm208461	GO:0055114,GO:0042773,GO:0016651
Bm220532	GO:0051028,GO:0055114,GO:0005507,GO:0005634
Bm241482	GO:0006397,GO:0005634
Bm111716	GO:0006355,GO:0003700,GO:0005488,GO:0043565,GO:0008270,GO:0005667
Bm270298	GO:0006825,GO:0005507,GO:0016531,GO:0005758
Bm062375	GO:0045333,GO:0005739,GO:0005634
Bm033426	GO:0045333,GO:0005634,GO:0005739
Bm113883	GO:0008152,GO:0016758
Bm013382	GO:0008152,GO:0016758
Bm263058	GO:0008270,GO:0016020
Bm103518	GO:0019835,GO:0009405,GO:0019867
Bm015689	GO:0055085,GO:0016021
Bm273952	GO:0008053,GO:0055085,GO:0003924,GO:0022857,GO:0005741,GO:0016021
Bm193138	GO:0015979,GO:0009523,GO:0009654,GO:0016020
Bm219758	GO:0006412,GO:0042254,GO:0003735,GO:0005622,GO:0005840
Bm259773	GO:0055085,GO:0030001,GO:0046873,GO:0016020
Bm070213	GO:0006725,GO:0030001,GO:0046872,GO:0008198,GO:0016491,GO:0010181
Bm213309	GO:0006570,GO:0006470,GO:0004725
Bm213303	GO:0006470,GO:0006570,GO:0004725,GO:0008138
Bm168347	GO:0015992,GO:0050920,GO:0015991,GO:0008608,GO:0007049,GO:0015078,GO:0003824,GO:0009288,GO:0033179,GO:0042729,GO:0072686
Bm147685	GO:0006144,GO:0006206,GO:0009069,GO:0006351,GO:0016310,GO:0003677,GO:0004674,GO:0003899,GO:0005730
Bm319247	GO:0006144,GO:0006351,GO:0006206,GO:0016779,GO:0003677,GO:1901363,GO:0097159,GO:0003899,GO:0005730
Bm300056	GO:0007165,GO:0051258,GO:0030168,GO:0030674,GO:0005102,GO:0005577
Bm286099	GO:0006950,GO:0009536
Bm239111	GO:0008152,GO:0016740,GO:0005542
Bm173509	GO:0007264,GO:0005525
Bm022940	GO:0030170,GO:0008483
Bm057590	GO:0015992,GO:0015991,GO:0015078,GO:0033177,GO:0016021
Bm331106	GO:0043531
Bm142864	GO:0009405,GO:0006570,GO:0009190,GO:0006470,GO:0035556,GO:0004725,GO:0016849
Bm283312	GO:0016567,GO:0008270,GO:0004842,GO:0005515,GO:0046872,GO:0061630,GO:0005680
Bm036995	GO:0007165,GO:0006935,GO:0031412,GO:0006955,GO:0008009,GO:0005576
Bm202248	GO:0007186,GO:0004930,GO:0016020
Bm023991	GO:0042254,GO:0006412,GO:0019064,GO:0007165,GO:0003735,GO:0046789,GO:0005840,GO:0005622,GO:0009986,GO:0019031
Bm163896	GO:0043565
Bm225181	GO:0006468,GO:0005524,GO:0004672
Bm020700	GO:0016773
Bm104307	GO:0000077,GO:0006275,GO:0003677,GO:0030896
Bm013719	GO:0055114,GO:0016616
Bm283146	GO:0006807,GO:0036361
Bm024918	GO:0006613,GO:0030176,GO:0005784
Bm162515	GO:0009098,GO:0055085,GO:0022857,GO:0016021
Bm162502	GO:0055085,GO:0008616,GO:0006400,GO:0008479,GO:0022857,GO:0016021
Bm272264	GO:0008152,GO:0055114,GO:0035307,GO:0016491,GO:0071595
Bm143965	GO:0046872
Bm108698	GO:0016043,GO:0030036,GO:0007049,GO:0006914,GO:0003677,GO:0017048,GO:0042803,GO:0008134,GO:0003779,GO:0045502,GO:0005667,GO:0030286
Bm135043	GO:0007155,GO:0007049,GO:0006816,GO:0006874,GO:0005219,GO:0016021,GO:0005622
Bm191164	GO:0008152,GO:0008484,GO:0046872,GO:0003824
Bm040401	GO:0055085,GO:0022857,GO:0016021
Bm009898	GO:0003723,GO:0008270,GO:0005515
Bm079209	GO:0006487,GO:0016021,GO:0008250
Bm045110	GO:0042254,GO:0006412,GO:0003735,GO:0005840,GO:0005622
Bm069641	GO:0006412,GO:0042254,GO:0003735,GO:0005622,GO:0005840
Bm296401	GO:0003676,GO:0046872,GO:0016787
Bm171610	GO:0003676,GO:0046872,GO:0016787
Bm322021	GO:0003676,GO:0005488
Bm165755	GO:0055114
Bm221396	GO:0006508,GO:0006355,GO:0007049,GO:0006270,GO:0043565,GO:0004197,GO:0003700,GO:0005667
Bm212321	GO:0005975,GO:0009250,GO:0003824,GO:0046527,GO:0043169,GO:0004553
Bm026219	GO:0005975,GO:0004553
Bm144944	GO:0001669
Bm305068	GO:0055085,GO:0006810,GO:0016020
Bm305072	GO:0006810,GO:0055085,GO:0016020
Bm331535	GO:0003333,GO:0006810,GO:0055085,GO:0006865,GO:0015171,GO:0016020
Bm168065	GO:0007264,GO:0005096,GO:0005515
Bm014319	GO:0006412,GO:0042254,GO:0003735,GO:0046872,GO:0019843,GO:0005622,GO:0005840
Bm088438	GO:0045454,GO:0005515
Bm274805	GO:0098599
Bm058842	GO:0098599
Bm238275	GO:0016020
Bm149033	GO:0034508,GO:0000776
Bm040352	GO:0005524,GO:0005856,GO:0005737
Bm257680	GO:0006355,GO:0006412,GO:0042254,GO:0003735,GO:0019239,GO:0005622,GO:0005840,GO:0005634
Bm299893	GO:0006568,GO:0006550,GO:0006631,GO:0006099,GO:0018874,GO:0006574,GO:0006552,GO:0055114,GO:0006633,GO:0006554,GO:0006090,GO:0071949,GO:0008924,GO:0003857,GO:0016491
Bm049180	GO:0009116,GO:0009165,GO:0006098,GO:0006144,GO:0000287,GO:0004749
Bm272239	GO:0007165,GO:0005509,GO:0005578,GO:0016020
Bm240868	GO:0009228,GO:0004789
Bm073152	GO:0006468,GO:0007283,GO:0004672,GO:0005524,GO:0005794
Bm267103	GO:0006807,GO:0005509,GO:0004668,GO:0005737
Bm318731	GO:0006090,GO:0006099,GO:0055114,GO:0016491,GO:0008924,GO:0004499,GO:0050660,GO:0050661
Bm211656	GO:0005515
Bm150236	GO:0005509
Bm253420	GO:0006119,GO:0006118,GO:0015992,GO:0008121
Bm253419	GO:0006119,GO:0006118,GO:0015992,GO:0008121
Bm225932	GO:0006119,GO:0015992,GO:0006118,GO:0008121
Bm102322	GO:0015986,GO:0006144,GO:0015992,GO:0015078,GO:0016817,GO:0003968,GO:0031379,GO:0000276
Bm102323	GO:0006412,GO:0042254,GO:0003735,GO:0005524,GO:0005622,GO:0005840
Bm143318	GO:0035023,GO:0043087,GO:0005089
Bm038702	GO:0006508,GO:0008270,GO:0004222,GO:0031012
Bm274684	GO:0005515
Bm163918	GO:0016021,GO:0019013
Bm203133	GO:0006364
Bm208207	GO:0055085,GO:0022857,GO:0016021
Bm257531	GO:0006310,GO:0043565
Bm238722	GO:0003677
Bm238721	GO:0006334,GO:0046982,GO:0003677,GO:0000786,GO:0005634
Bm163983	GO:0003333,GO:0006865,GO:0015171,GO:0016020
Bm217758	GO:0032508,GO:0003678,GO:0005524,GO:0005657
Bm111854	GO:0006260,GO:0002949,GO:0006281,GO:0006355,GO:0032508,GO:0006310,GO:0003678,GO:0009378,GO:0008134,GO:0016887,GO:0016301,GO:0005524,GO:0005667,GO:0005657,GO:0009379
Bm031444	GO:0002949,GO:0006281,GO:0006260,GO:0006355,GO:0032508,GO:0006310,GO:0009378,GO:0003678,GO:0008134,GO:0016887,GO:0016301,GO:0005524,GO:0005667,GO:0005657,GO:0009379
Bm163072	GO:0016787
Bm052186	GO:0009069,GO:0016310,GO:0006303,GO:0004677,GO:0003677,GO:0005524,GO:0005958,GO:0005634
Bm260712	GO:0005515,GO:0005737
Bm138680	GO:0007165,GO:0006355,GO:0007268,GO:0003700,GO:0030550,GO:0005667,GO:0005622,GO:0005576
Bm105071	GO:0055114,GO:0016491,GO:0016651
Bm253533	GO:0008033,GO:0016117,GO:0055114,GO:0016705,GO:0016491,GO:0050660
Bm323742	GO:0006364,GO:0030688
Bm293175	GO:0055114,GO:0016491
Bm187054	GO:0005985,GO:0042545,GO:0005982,GO:0030599,GO:0005618
Bm302386	GO:0032297,GO:0055114,GO:0006633,GO:0006144,GO:0006351,GO:0006206,GO:0006270,GO:0006383,GO:0004190,GO:0005524,GO:0016491,GO:0003899,GO:0005506,GO:0003677,GO:0016021,GO:0005666,GO:0005730
Bm047552	GO:0046872,GO:0016787,GO:0003676
Bm007060	GO:0006508,GO:0004185
Bm193822	GO:0055085,GO:0022857,GO:0016021
Bm178247	GO:0019752,GO:0046912,GO:0003824
Bm050747	GO:0005975,GO:0004553
Bm200366	GO:0006508,GO:0008233
Bm206852	GO:0005515,GO:0016020
Bm278096	GO:0003676,GO:0016021
Bm097998	GO:0042967,GO:0003676,GO:0008080
Bm284386	GO:0005524
Bm199361	GO:0046872,GO:0008270,GO:0003677
Bm262644	GO:0006810,GO:0003333,GO:0006865,GO:0055085,GO:0015171,GO:0016020
Bm158671	GO:0045454,GO:0055114,GO:0016209,GO:0016491
Bm227761	GO:0003676
Bm130485	GO:0006508,GO:0051297,GO:0019068,GO:0004222,GO:0005813
Bm243585	GO:0006269,GO:0006351,GO:0003896,GO:0005657,GO:0005730
Bm040206	GO:0006269,GO:0006351,GO:0003896,GO:0005730,GO:0005657
Bm315982	GO:0016310,GO:0016301,GO:0005524,GO:0016020
Bm059229	GO:0003333,GO:0006865,GO:0015171,GO:0016020
Bm223197	GO:0006522,GO:0008033,GO:0006531,GO:0051252,GO:0006529,GO:0004526,GO:0000049,GO:0004066,GO:0030677
Bm137521	GO:0018144,GO:0006144,GO:0005198,GO:0016818,GO:0003968,GO:0031379
Bm216729	GO:0006364,GO:0006270,GO:0032040
Bm233389	GO:0006364,GO:0005515
Bm045397	GO:0005515
Bm215517	GO:0055114,GO:0016491,GO:0005507
Bm177053	GO:0016021
Bm276665	GO:0007165,GO:0000413,GO:0006457,GO:0003755,GO:0009535,GO:0031977,GO:0016020
Bm284750	GO:0042254,GO:0006412,GO:0003735,GO:0019843,GO:0005840
Bm272775	GO:0008643,GO:0008146,GO:0005351,GO:0016021,GO:0000139,GO:0016020
Bm310022	GO:0055114,GO:0005506,GO:0016491
Bm202109	GO:0016192,GO:0006886,GO:0015991,GO:0043248,GO:0005515,GO:0016820,GO:0030117,GO:0000221
Bm322779	GO:0006772,GO:0009229,GO:0004788,GO:0005524
Bm320453	GO:0015031,GO:0006144,GO:0006351,GO:0015628,GO:0006206,GO:0005488,GO:0003677,GO:0008565,GO:0003899,GO:0015627,GO:0005730
Bm183414	GO:0016798
Bm159928	GO:0055114,GO:0016491
Bm146885	GO:0055114,GO:0016614
Bm322439	GO:0044564,GO:0035091
Bm185436	GO:0005515,GO:0004867,GO:0005576
Bm206295	GO:0006355,GO:0005515
Bm232313	GO:0050832,GO:0042742
Bm200605	GO:0042546,GO:0005199,GO:0005618
Bm004831	GO:0006367,GO:0005672
Bm110306	GO:0003676,GO:0008270
Bm041384	GO:0045859,GO:0004860,GO:0005576
Bm040391	GO:0042254,GO:0006412,GO:0003723,GO:0003735,GO:0005840
Bm121732	GO:0043065,GO:0003824,GO:0016021,GO:0005740
Bm195989	GO:0019752,GO:0030170,GO:0016831
Bm112824	GO:0042967,GO:0016779,GO:0008080,GO:0016747
Bm144477	GO:0055085,GO:0016021
Bm140689	GO:0006351,GO:0006260,GO:0000398,GO:0006367,GO:0003887,GO:0003677,GO:0005681,GO:0005672,GO:0042575
Bm111373	GO:0019028
Bm005895	GO:0008544
Bm054629	GO:0016021
Bm211857	GO:0016021
Bm068196	GO:0006631,GO:0006568,GO:0006550,GO:0006355,GO:0006633,GO:0006554,GO:0006574,GO:0018874,GO:0006552,GO:0055114,GO:0003700,GO:0003857,GO:0016491,GO:0005667
Bm106482	GO:0042128,GO:0055114,GO:0030151,GO:0016491
Bm131160	GO:0046872
Bm303404	GO:0016192,GO:0006886
Bm121259	GO:0006836,GO:0019905
Bm122146	GO:0016787,GO:0005524,GO:0003676,GO:0003677,GO:0005509,GO:0005615
Bm064915	GO:0004672,GO:0016757,GO:0016021
Bm012057	GO:0045667
Bm106850	GO:0006914,GO:0008608,GO:0072686,GO:0042729
Bm076792	GO:0006355,GO:0043565,GO:0016747,GO:0008270,GO:0003677,GO:0003700,GO:0005667
Bm243334	GO:0008152,GO:0016740,GO:0005542
Bm203838	GO:0000045,GO:0015979,GO:0046872,GO:0009523,GO:0005737,GO:0016021
Bm214311	GO:0055114,GO:0006144,GO:0006351,GO:0007165,GO:0015774,GO:0006206,GO:0051920,GO:0015159,GO:0005509,GO:0003899,GO:0005515,GO:0005578,GO:0016020,GO:0005730
Bm147164	GO:0008152
Bm196477	GO:0030430
Bm045751	GO:0055114,GO:0042254,GO:0006412,GO:0016491,GO:0003735,GO:0005840,GO:0005622
Bm263346	GO:0015979,GO:0019684,GO:0008033,GO:0051252,GO:0004540,GO:0009523,GO:0016021
Bm226604	GO:0007606,GO:0055085,GO:0019236,GO:0006810,GO:0007186,GO:0005215,GO:0004932,GO:0016020,GO:0016021
Bm288956	GO:0006810,GO:0007186,GO:0019236,GO:0055085,GO:0007606,GO:0004932,GO:0005215,GO:0016021,GO:0016020
Bm226673	GO:0019236,GO:0055085,GO:0006810,GO:0007186,GO:0007606,GO:0005215,GO:0004932,GO:0016021,GO:0016020
Bm182962	GO:0006355,GO:0042393,GO:0003700,GO:0042025,GO:0005667
Bm328422	GO:0005524
Bm249303	GO:0043039,GO:0006418,GO:0005524,GO:0000049,GO:0000166,GO:0004812,GO:0005737
Bm129794	GO:0006413,GO:0006446,GO:0003723,GO:0003743,GO:0005840,GO:0005737
Bm066275	GO:0007617,GO:0005576
Bm240727	GO:0007034,GO:0051259,GO:0047869
Bm280911	GO:0042470
Bm104429	GO:0006412,GO:0042254,GO:0003735,GO:0005840,GO:0015934
Bm143515	GO:0006122,GO:0005750
Bm198012	GO:0006694,GO:0015936,GO:0055114,GO:0004420,GO:0050662
Bm304384	GO:0055114,GO:0016491,GO:0010181
Bm106290	GO:0008033,GO:0055114,GO:0017150,GO:0050660,GO:0016491,GO:0010181
Bm106291	GO:0055114,GO:0010181,GO:0016491
Bm078074	GO:0016020
Bm078073	GO:0016758
Bm027099	GO:0006810,GO:0055085,GO:0005215,GO:0022857,GO:0016020,GO:0016021
Bm252002	GO:0006886,GO:0048280,GO:0000139,GO:0005737
Bm097146	GO:0005524
Bm105045	GO:0006508,GO:0008270,GO:0004222,GO:0031012
Bm012107	GO:0006885,GO:0055085,GO:0006812,GO:0015299,GO:0016021
Bm050369	GO:0006812,GO:0030001,GO:0055085,GO:0006885,GO:0015299,GO:0046873,GO:0016020,GO:0016021
Bm272966	GO:0008152,GO:0003824
Bm030946	GO:0042967,GO:0008080
Bm038302	GO:0006633,GO:0055114,GO:0005506,GO:0016491
Bm299579	GO:0015948,GO:0006520,GO:0008168
Bm327949	GO:0055085
Bm065581	GO:0006368,GO:0008023,GO:0019028
Bm257076	GO:0006355,GO:0006352,GO:0003700,GO:0003677,GO:0016987,GO:0005667
Bm184964	GO:0055085,GO:0042742,GO:0022857,GO:0016021
Bm184965	GO:0055085,GO:0022857,GO:0016021
Bm323448	GO:0006804,GO:0006979,GO:0055114,GO:0046872,GO:0020037,GO:0004601
Bm279258	GO:0008152,GO:0003824,GO:0016491,GO:0050662
Bm128049	GO:0055114,GO:0006552,GO:0018874,GO:0006574,GO:0006090,GO:0016117,GO:0006633,GO:0006550,GO:0006099,GO:0006554,GO:0006568,GO:0006631,GO:0016491,GO:0016705,GO:0008924,GO:0003857
Bm080600	GO:0055114,GO:0016491
Bm077759	GO:0006355,GO:0003700,GO:0005667
Bm298445	GO:0006412,GO:0042254,GO:0003735,GO:0005622,GO:0005840
Bm100385	GO:0005515
Bm072404	GO:0005515
Bm163066	GO:0017025,GO:0005515
Bm261227	GO:0006614,GO:0006810,GO:0006355,GO:0006139,GO:0006206,GO:0006260,GO:0003723,GO:0003677,GO:0003724,GO:0008134,GO:0004003,GO:0004127,GO:0016887,GO:0003924,GO:0005525,GO:0005524,GO:0005657,GO:0005667
Bm165756	GO:0016579,GO:0016787,GO:0036459
Bm284858	GO:0016579,GO:0036459,GO:0005515
Bm121052	GO:0006359,GO:0016579,GO:0036459
Bm183022	GO:0046487,GO:0006563,GO:0009396,GO:0006544,GO:0031388,GO:0006566,GO:0046486,GO:0004329,GO:0005524,GO:0008887
Bm049963	GO:0055114,GO:0006118,GO:0005506,GO:0016705,GO:0020037,GO:0004497,GO:0009055
Bm192447	GO:0015992,GO:0046034
Bm240992	GO:0006825,GO:0035434,GO:0006351,GO:0006950,GO:0006457,GO:0005524,GO:0005375,GO:0003677,GO:0005515,GO:0051082,GO:0005634,GO:0016021
Bm022452	GO:0015031,GO:0006464,GO:0016874,GO:0005515,GO:0000166,GO:0008270
Bm170233	GO:0006807,GO:0005975,GO:0016810
Bm259688	GO:0015689,GO:0055085,GO:0015098,GO:0016021
Bm198277	GO:0006914,GO:0016310,GO:0031412,GO:0008152,GO:0016301,GO:0016774,GO:0005622,GO:0031411
Bm179686	GO:0006355,GO:0015074,GO:0019087,GO:0003677,GO:0016021
Bm282491	GO:0015948,GO:0046656,GO:0030269,GO:0016021
Bm282692	GO:0015948,GO:0046656,GO:0030269,GO:0016021
Bm078520	GO:0006412,GO:0042254,GO:0003735,GO:0005840
Bm243618	GO:0007165,GO:0015991,GO:0000160,GO:0016820,GO:0004871,GO:0000221
Bm088812	GO:0070836,GO:0016021
Bm107268	GO:0000746,GO:0003677
Bm125280	GO:0055114,GO:0016491
Bm297934	GO:0000413,GO:0006457,GO:0003755
Bm208122	GO:0055085,GO:0016021
Bm274920	GO:0055085,GO:0016021
Bm305158	GO:0007010,GO:0003779
Bm262565	GO:0034220
Bm168735	GO:0006979,GO:0015947,GO:0055114,GO:0006568,GO:0006804,GO:0020037,GO:0004096
Bm145107	GO:0006694,GO:0006950,GO:0030436,GO:0016125,GO:0006508,GO:0047750,GO:0004190,GO:0016021
Bm322579	GO:0005515
Bm004267	GO:0006525,GO:0006355,GO:0043565,GO:0003700,GO:0005622,GO:0005667
Bm253890	GO:0006605,GO:0006886,GO:0005515,GO:0005742
Bm177120	GO:0006605,GO:0006886,GO:0005515,GO:0005742
Bm253891	GO:0006605,GO:0006886,GO:0005515,GO:0005742
Bm042141	GO:0006810,GO:0016021
Bm302107	GO:0006631,GO:0006568,GO:0006550,GO:0006554,GO:0006633,GO:0055114,GO:0006552,GO:0018874,GO:0006574,GO:0016616,GO:0051287,GO:0016491,GO:0003857
Bm098109	GO:0006631,GO:0006568,GO:0006550,GO:0006554,GO:0006633,GO:0006552,GO:0055114,GO:0018874,GO:0006574,GO:0016491,GO:0003857
Bm169614	GO:0006568,GO:0006550,GO:0006631,GO:0006552,GO:0055114,GO:0018874,GO:0006574,GO:0006554,GO:0006633,GO:0016491,GO:0003857
Bm292538	GO:0019028
Bm002802	GO:0006457,GO:0031072,GO:0051082
Bm286005	GO:0016021
Bm228830	GO:0005515
Bm171991	GO:0006810,GO:0034508,GO:0016021,GO:0030288,GO:0000776
Bm049765	GO:0003723
Bm333539	GO:0006886,GO:0015031,GO:0016567,GO:0008565,GO:0004842,GO:0003677,GO:0005737,GO:0016020
Bm151759	GO:0055114,GO:0016114,GO:0006694,GO:0071949,GO:0004506,GO:0050660,GO:0016021
Bm132935	GO:0055114,GO:0050660,GO:0016614
Bm084446	GO:0042254,GO:0006412,GO:0003735,GO:0005840,GO:0005761
Bm148108	GO:0006810,GO:0005524,GO:0016787,GO:0003677,GO:0004003,GO:0003676,GO:0005657
Bm302821	GO:0006468,GO:0042254,GO:0006412,GO:0005524,GO:0004672,GO:0003735,GO:0005840,GO:0005622
Bm273922	GO:0003676,GO:0008270,GO:0019028
Bm072509	GO:0006412,GO:0042254,GO:0003735,GO:0005840
Bm149894	GO:0006355,GO:0006352,GO:0003700,GO:0004190,GO:0016987,GO:0003677,GO:0008270,GO:0016021,GO:0005667,GO:0005634
Bm008017	GO:0055085,GO:0022857,GO:0016021
Bm019543	GO:0042254,GO:0006412,GO:0005515,GO:0003735,GO:0005840,GO:0005622
Bm211314	GO:0006355,GO:0003677,GO:0046983,GO:0005634
Bm027792	GO:0006412,GO:0042254,GO:0003735,GO:0005622,GO:0005840
Bm247956	GO:0000413,GO:0006457,GO:0003755
Bm025092	GO:0008610,GO:0042742,GO:0030500,GO:0006633,GO:0046848,GO:0016747,GO:0016020,GO:0005576
Bm296572	GO:0006013,GO:0006614,GO:0006000,GO:0006418,GO:0004812,GO:0005525,GO:0005524,GO:0003873,GO:0000166,GO:0005737
Bm144565	GO:0055114,GO:0016616
Bm286861	GO:0006810,GO:0005215,GO:0016020
Bm225621	GO:0006355,GO:0003677,GO:0003700,GO:0005507,GO:0005634,GO:0005667
Bm079318	GO:0055114,GO:0006118,GO:0016651,GO:0016491,GO:0051536,GO:0003723,GO:0009055
Bm079319	GO:0055114,GO:0007165,GO:0016491,GO:0016651,GO:0004872,GO:0051536,GO:0016020
Bm230256	GO:0005615
Bm320778	GO:0006810,GO:0003333,GO:0006865,GO:0055085,GO:0015171,GO:0016020
Bm314858	GO:0016567,GO:0044763,GO:0006464,GO:0048731,GO:0008270,GO:0046872,GO:0005515,GO:0004842,GO:0005680
Bm314859	GO:0006810,GO:0009405,GO:0008200,GO:0005576
Bm207383	GO:0006367,GO:0005672
Bm252910	GO:0055085,GO:0022857,GO:0016021
Bm069654	GO:0006119,GO:0015992,GO:0006118,GO:0009055,GO:0008121
Bm108704	GO:0034314,GO:0030041,GO:0015629,GO:0005885
Bm104345	GO:0006397,GO:0005634
Bm241571	GO:0006357,GO:0051252,GO:0004523,GO:0003676,GO:0001104,GO:0005680,GO:0016592
Bm315876	GO:0005982,GO:0000272,GO:0005985,GO:0008810
Bm226290	GO:0007165,GO:0005509,GO:0005515,GO:0005578
Bm287645	GO:0007165,GO:0008601,GO:0000159
Bm165524	GO:0007165,GO:0008601,GO:0000159
Bm089268	GO:0007217,GO:0007165,GO:0042254,GO:0006412,GO:0004872,GO:0003735,GO:0005840,GO:0005622
Bm194483	GO:0006810,GO:0050832,GO:0042742,GO:0006355,GO:0006811,GO:0003677,GO:0005215,GO:0016020
Bm301430	GO:0005515
Bm131319	GO:0051016,GO:0008290
Bm070127	GO:0051603,GO:0004298,GO:0005839
Bm145434	GO:0007049,GO:0007067,GO:0006629,GO:0015986,GO:0015992,GO:0015078,GO:0005634,GO:0000775
Bm082459	GO:0046034,GO:0006144,GO:0004017
Bm215315	GO:0046983
Bm064385	GO:0008152,GO:0006537,GO:0055114,GO:0003824,GO:0016638,GO:0015930,GO:0016829,GO:0016491
Bm295673	GO:0006118,GO:0009055,GO:0019867,GO:0016021
Bm062374	GO:0006182,GO:0016579,GO:0046039,GO:0006144,GO:0004383,GO:0036459
Bm134602	GO:0055114,GO:0007304,GO:0005213,GO:0004252,GO:0047134,GO:0008270,GO:0005515,GO:0005576,GO:0005886,GO:0042600
Bm245475	GO:0008643,GO:0006446,GO:0006355,GO:0051382,GO:0043565,GO:0005351,GO:0003700,GO:0003743,GO:0003677,GO:0005667,GO:0016021,GO:0000776,GO:0070461,GO:0005737,GO:0005852,GO:0005840,GO:0005634,GO:0000139
Bm193285	GO:0055114,GO:0006118,GO:0008152,GO:0050660,GO:0003995,GO:0016627
Bm059171	GO:0055114,GO:0006118,GO:0003995,GO:0016627
Bm334995	GO:0005576
Bm168078	GO:0006412,GO:0042254,GO:0003735,GO:0005622,GO:0005840
Bm195992	GO:0006412,GO:0042254,GO:0003735,GO:0005622,GO:0005840
Bm195994	GO:0006355,GO:0009965,GO:0010090,GO:0000911,GO:0006412,GO:0042254,GO:0003735,GO:0003677,GO:0005730,GO:0009507,GO:0005618,GO:0005840,GO:0022626,GO:0016020
Bm065089	GO:0005515
Bm066483	GO:0015031,GO:0000921,GO:0048309,GO:0008053,GO:0051028,GO:0006886,GO:0070206,GO:0006260,GO:0003924,GO:0008565,GO:0005198,GO:0003774,GO:0016020,GO:0005737,GO:0016459,GO:0005882,GO:0005741,GO:0016021,GO:0005940,GO:0071203
Bm129220	GO:0006355,GO:0046983
Bm235791	GO:0048193,GO:0070273
Bm235794	GO:0048193,GO:0070273
Bm101564	GO:0006468,GO:0005524,GO:0004672
Bm038143	GO:0003676
Bm116027	GO:0000160
Bm292095	GO:0006725,GO:0055114,GO:0003824,GO:0008199
Bm119324	GO:0006468,GO:0000166,GO:0004672,GO:0005524
Bm310465	GO:0048870,GO:0006886,GO:0031514,GO:0016021,GO:0005783
Bm084544	GO:0006071,GO:0006000,GO:0006098,GO:0006096,GO:0015976,GO:0006094,GO:0006013,GO:0042132,GO:0016021
Bm157150	GO:0006351,GO:0007049,GO:0017053
Bm155773	GO:0016310,GO:0009069,GO:0008384,GO:0008270,GO:0008385
Bm054501	GO:0006468,GO:0004672,GO:0005524
Bm191091	GO:0055085,GO:0022857,GO:0016021
Bm255392	GO:0016020
Bm004091	GO:0009247,GO:0016758
Bm189862	GO:0007010,GO:0006355,GO:0003677,GO:0043565,GO:0051082,GO:0003779,GO:0003700,GO:0005634,GO:0005667
Bm008853	GO:0055114,GO:0016117,GO:0050660,GO:0016614,GO:0016705
Bm059814	GO:0008152,GO:0008253,GO:0000287,GO:0016791,GO:0005737
Bm039032	GO:0006144,GO:0009113,GO:0004637
Bm047532	GO:0006269,GO:0006351,GO:0003676,GO:0008270,GO:0004386,GO:0003896,GO:0005730,GO:0005657
Bm226367	GO:0005515
Bm297905	GO:0005975,GO:0004553
Bm116131	GO:0006323,GO:0005524
Bm235139	GO:0009452,GO:0019530,GO:0055085,GO:0001510,GO:0055114,GO:0006534,GO:0046439,GO:0005506,GO:0017172,GO:0008168,GO:0016021
Bm312967	GO:0005515
Bm260929	GO:0032040
Bm188836	GO:0004190,GO:0016021
Bm287771	GO:0016787
Bm153540	GO:0006464,GO:0042254,GO:0006412,GO:0003824,GO:0019843,GO:0016151,GO:0003735,GO:0046872,GO:0005840,GO:0005622
Bm104081	GO:0042254,GO:0006412,GO:0003735,GO:0005840,GO:0005622
Bm064157	GO:0007275
Bm080858	GO:0009451,GO:0001522,GO:0009982,GO:0003723
Bm311743	GO:0046872,GO:0008270
Bm026321	GO:0017038,GO:0003677,GO:0003676,GO:0005524,GO:0016787,GO:0016020
Bm047814	GO:0003676,GO:0005524
Bm124689	GO:0000902,GO:0003677
Bm191382	GO:0019482,GO:0015940,GO:0006810,GO:0005524,GO:0042626,GO:0004592,GO:0016020,GO:0016021
Bm099597	GO:0006308,GO:0008855,GO:0009318
Bm184889	GO:0005198
Bm031544	GO:0003723
Bm182308	GO:0055114,GO:0003723,GO:0016706
Bm278943	GO:0055114,GO:0016491
Bm223320	GO:0006438,GO:0009098,GO:0009097,GO:0006357,GO:0009099,GO:0006948,GO:0004832,GO:0001104,GO:0003677,GO:0000166,GO:0005524,GO:0005737,GO:0016592
Bm329492	GO:0006418,GO:0000166,GO:0004812,GO:0005524
Bm043434	GO:0006568,GO:0006631,GO:0006508,GO:0006554,GO:0015992,GO:0006814,GO:0006550,GO:0006120,GO:0018144,GO:0055114,GO:0006552,GO:0018874,GO:0006574,GO:0006633,GO:0006144,GO:0006744,GO:0016787,GO:0003968,GO:0008233,GO:0016740,GO:0003857,GO:0050662,GO:0000166,GO:0016779,GO:0008137,GO:0005198,GO:0016491,GO:0008234,GO:0019012,GO:0031379
Bm086667	GO:0008270
Bm193835	GO:0006123,GO:0015992,GO:0004129,GO:0008146,GO:0045277
Bm224465	GO:0006508,GO:0001503,GO:0004190,GO:0016021
Bm275385	GO:0003676
Bm190944	GO:0034599,GO:0004190,GO:0005789,GO:0016021
Bm294382	GO:0016023
Bm325617	GO:0046872,GO:0008270
Bm095176	GO:0006270,GO:0003676
Bm112587	GO:0030541
Bm207185	GO:0006412,GO:0042254,GO:0003735,GO:0005622,GO:0005840
Bm098984	GO:0007218,GO:0005185,GO:0004222,GO:0005576
Bm246187	GO:0046872
Bm095784	GO:0009058,GO:0030170
Bm130333	GO:0006810,GO:0003333,GO:0006865,GO:0055085,GO:0015171,GO:0005515,GO:0016020
Bm082631	GO:0001522,GO:0006396,GO:0003723,GO:0009982
Bm268954	GO:0006412,GO:0042254,GO:0003735,GO:0005622,GO:0005840
Bm219659	GO:0006298,GO:0055114,GO:0046872,GO:0005524,GO:0016491
Bm122491	GO:0006508,GO:0004222,GO:0005524
Bm038718	GO:0007049,GO:0006351,GO:0017053
Bm297370	GO:0009058,GO:0015996,GO:0006629,GO:0006505,GO:0015994,GO:0006886,GO:0047746,GO:0016788,GO:0016787
Bm033529	GO:0006508,GO:0004190,GO:0030170,GO:0005515,GO:0008483
Bm217008	GO:0006364,GO:0032040
Bm030883	GO:0005515
Bm072251	GO:0015992,GO:0006123,GO:0004129,GO:0045277
Bm305990	GO:0046872
Bm249083	GO:0007165,GO:0007155,GO:0005173,GO:0016021,GO:0016020
Bm283543	GO:0019843,GO:0003723,GO:0005622
Bm257425	GO:0006813,GO:0055114,GO:0016117,GO:0016491,GO:0016614,GO:0008641,GO:0050660,GO:0016705,GO:0071949
Bm295010	GO:0030036,GO:0003779,GO:0005737,GO:0015629
Bm228763	GO:0006825,GO:0005507,GO:0016531,GO:0003677,GO:0005634,GO:0005758
Bm286169	GO:0007264,GO:0005525
Bm232837	GO:0003677
Bm221356	GO:0042254,GO:0006412,GO:0003735,GO:0003676,GO:0005840,GO:0005622
Bm272874	GO:0006952,GO:0005576
Bm099843	GO:0006508,GO:0004222
Bm051756	GO:0016787
Bm072060	GO:0003677
Bm197795	GO:0005515
Bm211802	GO:0003924
Bm030859	GO:0003676
Bm045340	GO:0005992,GO:0003824
Bm156309	GO:0005992,GO:0003824
Bm202425	GO:0006633,GO:0055114,GO:0005506,GO:0016491
Bm298294	GO:0008152,GO:0003824,GO:0008484,GO:0046872
Bm271645	GO:0007283,GO:0006855,GO:0055085,GO:0015893,GO:0006810,GO:0015297,GO:0015238,GO:0016020
Bm330841	GO:0006364,GO:0034457,GO:0005732,GO:0005634
Bm182390	GO:0006555,GO:0006730,GO:0004013
Bm178767	GO:0005515
Bm137183	GO:0007165,GO:0016055,GO:0007275,GO:0005102,GO:0005576
Bm300228	GO:0097159,GO:0003676,GO:1901363
Bm328642	GO:0008152,GO:0006480,GO:0008171,GO:0003723,GO:0008168
Bm142026	GO:0008152,GO:0020037,GO:0016747
Bm052669	GO:0030150,GO:0005515,GO:0016853,GO:0005744
Bm146305	GO:0005515
Bm060455	GO:0006468,GO:0005515,GO:0005524,GO:0004672
Bm208809	GO:0005515
Bm012997	GO:0046487,GO:0008152,GO:0008967
Bm106485	GO:0004252,GO:0016021
Bm147367	GO:0008152,GO:0055114,GO:0016491
Bm213009	GO:0008152,GO:0055114,GO:0016491
Bm165945	GO:0005515
Bm203955	GO:0006355,GO:0006508,GO:0006813,GO:0005524,GO:0008233,GO:0005267,GO:0016021,GO:0016020
Bm279760	GO:0042128,GO:0008270,GO:0003677,GO:0005634
Bm157143	GO:0006493,GO:0000030,GO:0000136,GO:0016020
Bm005708	GO:0006457,GO:0005737
Bm105437	GO:0031221,GO:0009117,GO:0005975,GO:0046556
Bm077434	GO:0007155,GO:0005634,GO:0016021
Bm290273	GO:0019385,GO:0030976,GO:0000287
Bm290272	GO:0030976
Bm290274	GO:0030976
Bm139198	GO:0006260,GO:0019079,GO:0006614,GO:0006810,GO:0003676,GO:0003688,GO:0043531,GO:0016887,GO:0005525,GO:0003924,GO:0016301,GO:0005524,GO:0008026,GO:0016787,GO:0003677,GO:0046809
Bm308602	GO:0000372,GO:0030529
Bm087287	GO:0016787
Bm118093	GO:0015992,GO:0015986,GO:0015078,GO:0000276
Bm276274	GO:0005515
Bm149948	GO:0032780,GO:0042030,GO:0005739
Bm079403	GO:0016570,GO:0006368,GO:0016593
Bm273067	GO:0015994,GO:0015996,GO:0047746,GO:0016021
Bm029655	GO:0016746,GO:0016021
Bm144884	GO:0016310,GO:0006109,GO:0000160,GO:0003774,GO:0005524,GO:0004672,GO:0000155,GO:0016459,GO:0009365
Bm132279	GO:0000103,GO:0006260,GO:0002949,GO:0006576,GO:0006144,GO:0004020,GO:0005525,GO:0003924,GO:0005524,GO:0003677,GO:0016887,GO:0005664,GO:0016020
Bm269813	GO:0006508,GO:0016787,GO:0004252
Bm218540	GO:0005739
Bm197047	GO:0055114,GO:0006633,GO:0005506,GO:0016491
Bm092458	GO:0006544,GO:0042967,GO:0006563,GO:0006566,GO:0006778,GO:0006783,GO:0003870,GO:0030170,GO:0005759
Bm039163	GO:0006952,GO:0016765
Bm262796	GO:0006355,GO:0016817
Bm164398	GO:0006355,GO:0016817
Bm233151	GO:0016757,GO:0016021
Bm253914	GO:0006810,GO:0016021
Bm054489	GO:0008152
Bm143753	GO:0006886,GO:0016192
Bm140662	GO:0009734,GO:0006355,GO:0005515,GO:0046983,GO:0005634
Bm085175	GO:0016787
Bm139053	GO:0016787
Bm116087	GO:0046500,GO:0008152,GO:0007010,GO:0006464,GO:0006479,GO:0008168,GO:0004719,GO:0003779
Bm241542	GO:0003676
Bm116716	GO:0006508,GO:0008234
Bm210578	GO:0045859,GO:0019887,GO:0005956
Bm170149	GO:0007165,GO:0016310,GO:0000160,GO:0000155,GO:0009365
Bm237627	GO:0051603,GO:0004298,GO:0005839,GO:0000502
Bm270082	GO:0008152,GO:0055114,GO:0016491
Bm168769	GO:0005515
Bm097633	GO:0042254,GO:0005622
Bm262976	GO:0005975,GO:0004553
Bm161587	GO:0042546,GO:0009664,GO:0005199,GO:0005618
Bm291140	GO:0006094,GO:0006096,GO:0015976,GO:0005975,GO:0006013,GO:0006098,GO:0006000,GO:0042132,GO:0042578
Bm140491	GO:0004190,GO:0097159,GO:1901363,GO:0003676,GO:0016021
Bm317676	GO:0055085,GO:0019439,GO:0022857,GO:0016833,GO:0016021
Bm268235	GO:0006665,GO:0006807,GO:0006687,GO:0005975,GO:0004348,GO:0016021
Bm301739	GO:0006687,GO:0005975,GO:0006807,GO:0006665,GO:0004348,GO:0016021
Bm045998	GO:0006260,GO:0003887,GO:0003677,GO:0042575
Bm093228	GO:0006260,GO:0003677,GO:0003887,GO:0042575
Bm138256	GO:0006260,GO:0003887,GO:0003677,GO:0042575
Bm138255	GO:0032780,GO:0042030,GO:0005739
Bm228022	GO:0006534,GO:0031071,GO:0030170
Bm297383	GO:0006313
Bm133939	GO:0035444,GO:0015675,GO:0046872,GO:0015099,GO:0016021
Bm250176	GO:0055114,GO:0006979,GO:0006804,GO:0004601,GO:0020037
Bm119362	GO:0006804,GO:0006979,GO:0015074,GO:0055114,GO:0020037,GO:0004601,GO:0005515,GO:0003677
Bm087415	GO:0007165,GO:0005975,GO:0005515,GO:0005509,GO:0004553,GO:0005578
Bm279492	GO:0015992,GO:0015986,GO:0015078
Bm074701	GO:0016192,GO:0006886,GO:0005515,GO:0030117
Bm243124	GO:0015991,GO:0005515,GO:0016820,GO:0000221
Bm035301	GO:0046872,GO:0000166
Bm023594	GO:0000166,GO:0046872
Bm320496	GO:0003950,GO:0005634
Bm093987	GO:0033617,GO:0005739
Bm323819	GO:0006351,GO:0008270,GO:0003677,GO:0005634
Bm273172	GO:0055114,GO:0050661,GO:0016491
Bm286565	GO:0005515,GO:0005506
Bm321063	GO:0006457,GO:0000774,GO:0042803,GO:0051087
Bm071727	GO:0016021
Bm297260	GO:0006281,GO:0005634
Bm302788	GO:0042254,GO:0006412,GO:0003735,GO:0005840,GO:0005622
Bm135493	GO:0055085,GO:0022857,GO:0016021
Bm062215	GO:0055085,GO:0022857,GO:0016021
Bm208486	GO:0007016,GO:0004222,GO:0016010
Bm225425	GO:0006352
Bm072806	GO:0015979,GO:0055114,GO:0015995,GO:0046872,GO:0016491
Bm163457	GO:0006309,GO:0016787,GO:0005634,GO:0005737
Bm124791	GO:0031419,GO:0046872,GO:0005515
Bm309479	GO:0005515
Bm087331	GO:0006122,GO:0005750,GO:0005743
Bm114243	GO:0006355,GO:0003677,GO:0003700,GO:0005634,GO:0005667
Bm200344	GO:0006418,GO:0005524,GO:0004812,GO:0000166
Bm194260	GO:0005576
Bm110604	GO:0016787,GO:0098599
Bm307917	GO:0006606,GO:0007155,GO:0007165,GO:0007067,GO:0055085,GO:0030001,GO:0003677,GO:0046873,GO:0004871,GO:0042729,GO:0016020,GO:0072686
Bm284060	GO:0005975,GO:0004553
Bm158477	GO:0005198,GO:0019013
Bm143528	GO:0016787,GO:0015016
Bm291841	GO:0005975,GO:0004553,GO:0004180,GO:0043169
Bm195092	GO:0042254,GO:0006412,GO:0051537,GO:0003735,GO:0005840,GO:0005622
Bm166377	GO:0019087,GO:0006508,GO:0008236,GO:0003677,GO:0003676,GO:0016787,GO:0005524
Bm022032	GO:0005525
Bm023174	GO:0006417,GO:0045182
Bm053939	GO:0003676
Bm090321	GO:0019031
Bm047886	GO:0004672,GO:0016757,GO:0016021
Bm097384	GO:0007166,GO:0007186,GO:0004930,GO:0016020,GO:0016021
Bm038970	GO:0005975,GO:0004553,GO:0003824
Bm019950	GO:0007275,GO:0007304,GO:0005213,GO:0005198,GO:0005578,GO:0042600
Bm240289	GO:0015979,GO:0009522,GO:0016021
Bm059619	GO:0015743,GO:0006874,GO:0006816,GO:0005219,GO:0016021,GO:0005622
Bm051282	GO:0016020
Bm271438	GO:0019012
Bm177543	GO:0003677
Bm143220	GO:0006508,GO:0004252
Bm156911	GO:0006355,GO:0046983,GO:0003700,GO:0003677,GO:0005667,GO:0005634
Bm223631	GO:0005515
Bm062523	GO:0005515
Bm223633	GO:0005515
Bm072659	GO:0042254,GO:0006412,GO:0016874,GO:0003735,GO:0016884,GO:0005840,GO:0005622
Bm164811	GO:0006814,GO:0006525,GO:0071436,GO:0006090,GO:0006560,GO:0015081,GO:0046872,GO:0008948,GO:0008270,GO:0016020
Bm162261	GO:0007218,GO:0005185,GO:0005576
Bm228426	GO:0042184,GO:0006886,GO:0046232,GO:0018874,GO:0055114,GO:0019261,GO:0009712,GO:0006605,GO:0042203,GO:0005506,GO:0018576,GO:0016020
Bm319522	GO:0008017,GO:0045298
Bm164239	GO:0019722,GO:0019028
Bm253861	GO:0055085,GO:0022857,GO:0016021
Bm067496	GO:0006094,GO:0015976,GO:0006096,GO:0016310,GO:0055114,GO:0016491,GO:0004618
Bm092728	GO:0005515,GO:0016772
Bm015234	GO:0006812,GO:0032801,GO:0019076,GO:0003779,GO:0005261,GO:0033644,GO:0005622
Bm165832	GO:0046486,GO:0042967,GO:0004144,GO:0005515
Bm275976	GO:0019049,GO:0009279
Bm035439	GO:0000271,GO:0006810,GO:0000413,GO:0006457,GO:0003755,GO:0016021
Bm243266	GO:0009245,GO:0016747
Bm153497	GO:0008168
Bm081946	GO:0008168
Bm162077	GO:0000413,GO:0006457,GO:0003755
Bm104270	GO:0005515
Bm123104	GO:0006486,GO:0018279,GO:0004579,GO:0016021,GO:0008250,GO:0005783
Bm184479	GO:0006094,GO:0006096,GO:0005975,GO:0015976,GO:0006013,GO:0006098,GO:0006000,GO:0042132,GO:0042578
Bm206089	GO:0007156,GO:0007018,GO:0005509,GO:0005515,GO:0016020,GO:0005868
Bm094808	GO:0006412,GO:0042254,GO:0003735,GO:0003723,GO:0005840
Bm234948	GO:0042254,GO:0006412,GO:0003735,GO:0005840
Bm245814	GO:0030071,GO:0007031,GO:0031145,GO:0019069,GO:0005779,GO:0005680,GO:0042025
Bm214075	GO:0007601,GO:0006144,GO:0030553,GO:0004114
Bm309669	GO:0046907
Bm140095	GO:0046907
Bm229777	GO:0003676
Bm229778	GO:0009236,GO:0006824,GO:0015087,GO:0016020
Bm107265	GO:0009405,GO:0005198,GO:0008270,GO:0005515
Bm066917	GO:0015074
Bm115919	GO:0000902
Bm280211	GO:0006118,GO:0009055,GO:0051536,GO:0005488
Bm289071	GO:0006118,GO:0009055,GO:0051536,GO:0005488
Bm263593	GO:0003676,GO:0008270
Bm126417	GO:0008152,GO:0016747
Bm333109	GO:0004190,GO:0016021
Bm233499	GO:0006614,GO:0008312,GO:0048500
Bm294355	GO:0006189,GO:0000160,GO:0003677,GO:0000156,GO:0005524
Bm294257	GO:0006144,GO:0006206,GO:0006351,GO:0003677,GO:0003899,GO:0005730
Bm080480	GO:0005525
Bm328334	GO:0006098,GO:0006000,GO:0006013,GO:0006094,GO:0006096,GO:0015976,GO:0005975,GO:0042578,GO:0042132
Bm015411	GO:0007219,GO:0007423
Bm177452	GO:0007275,GO:0007219,GO:0030154,GO:0016021
Bm034903	GO:0015031,GO:0006464,GO:0005515
Bm043290	GO:0006013,GO:0006096,GO:0006094,GO:0006000,GO:0006098,GO:0006012,GO:0003872,GO:0005945
Bm239539	GO:0005515
Bm208862	GO:0005509
Bm039869	GO:0008270,GO:0046872,GO:0005515
Bm039347	GO:0005515
Bm284699	GO:0005515
Bm288191	GO:0055114,GO:0006123,GO:0009060,GO:0006118,GO:0015992,GO:0004129,GO:0009055,GO:0005506,GO:0020037,GO:0045277,GO:0016021
Bm288192	GO:0055114,GO:0006123,GO:0006118,GO:0009060,GO:0015992,GO:0005506,GO:0020037,GO:0004129,GO:0009055,GO:0016021,GO:0045277
Bm250747	GO:0006465,GO:0055085,GO:0022857,GO:0008233,GO:0005787,GO:0016021
Bm040702	GO:0006282,GO:0009536
Bm207837	GO:0006355,GO:0008270,GO:0000981,GO:0005634
Bm207838	GO:0005975,GO:0016758,GO:0016020
Bm251124	GO:0055114,GO:0016614
Bm297388	GO:0052855,GO:0003824
Bm106973	GO:0032040
Bm177681	GO:0005975,GO:0004553
Bm026953	GO:0006412,GO:0042254,GO:0003735,GO:0005622,GO:0005840
Bm099912	GO:0008152,GO:0016846
Bm256240	GO:0009236,GO:0003824
Bm062402	GO:0007186,GO:0045893,GO:0007218,GO:1902208,GO:0003677,GO:0004930
Bm167988	GO:0007186,GO:0004930,GO:0016021
Bm003879	GO:0006629,GO:0003676,GO:0016787,GO:0004857,GO:0003677,GO:0005524,GO:0008026,GO:0042627
Bm322433	GO:0006468,GO:0005524,GO:0004672,GO:0016023,GO:0016012
Bm258211	GO:0007264,GO:0005525
Bm161539	GO:0003676,GO:0005524
Bm011020	GO:0006355,GO:0005524,GO:0005634
Bm007480	GO:0006355,GO:0005524,GO:0005634
Bm060319	GO:0006355,GO:0005524,GO:0016021,GO:0005634
Bm286739	GO:0019054,GO:0008152,GO:0003824,GO:0016836,GO:0004857
Bm125551	GO:0097588
Bm260555	GO:0016021
Bm065611	GO:0006810,GO:0016021
Bm151760	GO:0008152,GO:0016491
Bm212949	GO:0006886,GO:0006605,GO:0016020
Bm084163	GO:0050765
Bm184760	GO:0006260,GO:0006310,GO:0006281,GO:0005524,GO:0003910
Bm056843	GO:0035064
Bm182117	GO:0008152,GO:0003824
Bm199056	GO:0030153,GO:0006508,GO:0004222
Bm080715	GO:0006979,GO:0055114,GO:0006804,GO:0004601,GO:0020037
Bm189226	GO:0005515
Bm115280	GO:0006886,GO:0015031,GO:0006605,GO:0015450,GO:0005622,GO:0009941,GO:0016020
Bm266172	GO:0005198,GO:0003779,GO:0005856
Bm266170	GO:0042254,GO:0006810,GO:0005524,GO:0003924,GO:0005525,GO:0016887,GO:0005634
Bm241656	GO:0016021
Bm103743	GO:0006544,GO:0006730,GO:0009058,GO:0050896,GO:0016741,GO:0016740,GO:0043169,GO:0030170,GO:0016020,GO:0032991,GO:0031967,GO:0005739,GO:0009536
Bm015696	GO:0006396,GO:0009451,GO:0008173,GO:0003723
Bm147641	GO:0015992,GO:0006123,GO:0004129,GO:0045277
Bm200972	GO:0006886,GO:0016192,GO:0005198,GO:0005515,GO:0030117
Bm257927	GO:0005515
Bm170392	GO:0019530,GO:0055114,GO:0046439,GO:0006534,GO:0017172,GO:0005506,GO:0016702
Bm241435	GO:0006508,GO:0008233
Bm203164	GO:0006511,GO:0004175,GO:0005515,GO:0019773
Bm251446	GO:0008152,GO:0050662,GO:0016491,GO:0003824
Bm086026	GO:0005488,GO:0016874
Bm147494	GO:0008152,GO:0003824,GO:0048037
Bm322835	GO:0008152,GO:0055114,GO:0016620,GO:0016491
Bm143616	GO:0055114,GO:0007186,GO:0006633,GO:0005506,GO:0016491,GO:0004930,GO:0016021
Bm164783	GO:0005515,GO:0003676
Bm143614	GO:0055114,GO:0006633,GO:0005506,GO:0016491
Bm178844	GO:0055114,GO:0016702
Bm169958	GO:0055114,GO:0006118,GO:0016627,GO:0003995
Bm105571	GO:0055114,GO:0006119,GO:0015992,GO:0006118,GO:0008121
Bm159635	GO:0006355,GO:0000981,GO:0008270,GO:0043565,GO:0003700,GO:0005634,GO:0005667
Bm077066	GO:0035556,GO:0005515
Bm000759	GO:0005515
Bm205764	GO:0006139,GO:0016818,GO:0003676,GO:0005524,GO:0008026
Bm275704	GO:0009116,GO:0006098,GO:0009165,GO:0006144,GO:0000287,GO:0004749
Bm227520	GO:0006576,GO:0043531,GO:0016887,GO:0005525,GO:0003924,GO:0005524
Bm061189	GO:0055114,GO:0010181,GO:0016491
Bm072497	GO:0015689,GO:0015098,GO:0016021
Bm284587	GO:0015992,GO:0015986,GO:0015078,GO:0000276
Bm333411	GO:0090063,GO:0000226,GO:0005198,GO:0000922,GO:0019031,GO:0005815,GO:0019028
Bm283549	GO:0005509,GO:0005515
Bm194946	GO:0009405
Bm244349	GO:0005524
Bm004880	GO:0005634
Bm122843	GO:0007050,GO:0009069,GO:0045859,GO:0016310,GO:0006334,GO:0004674,GO:0004861,GO:0005634
Bm108129	GO:0015074
Bm281278	GO:0007165,GO:0016020
Bm140343	GO:0016021
Bm317907	GO:0016021
Bm002779	GO:0008152,GO:0016747
Bm071675	GO:0017148,GO:0006413,GO:0005845
Bm202381	GO:0006493,GO:0043087,GO:0000030,GO:0005085,GO:0000136,GO:0016020
Bm136595	GO:0000398,GO:0005634
Bm151319	GO:0005515
Bm123399	GO:0007049,GO:0007067,GO:0005634,GO:0000775
Bm249591	GO:0006355,GO:0006342,GO:0006476,GO:0006807,GO:0016811,GO:0051287,GO:0017136,GO:0008270,GO:0000118
Bm063309	GO:0006355,GO:0003700,GO:0003677,GO:0043565,GO:0005667,GO:0005634
Bm002486	GO:0055085,GO:0006814,GO:0006810,GO:0005215,GO:0016021,GO:0016020
Bm002335	GO:0008152,GO:0016597
Bm172884	GO:0016310,GO:0006886,GO:0016772,GO:0005741
Bm279142	GO:0006468,GO:0004672,GO:0005524,GO:0005515,GO:0005509
Bm308957	GO:0042254,GO:0006412,GO:0003735,GO:0005840,GO:0005622
Bm308956	GO:0006412,GO:0042254,GO:0003735,GO:0005622,GO:0005840
Bm308959	GO:0006412,GO:0042254,GO:0003735,GO:0005622,GO:0005840
Bm098198	GO:0042254,GO:0006412,GO:0003735,GO:0005840,GO:0005622
Bm308961	GO:0042254,GO:0006412,GO:0003735,GO:0005840,GO:0005622
Bm308960	GO:0042254,GO:0006412,GO:0003735,GO:0005840,GO:0005622
Bm092962	GO:0042254,GO:0006412,GO:0003735,GO:0005840,GO:0005622
Bm152983	GO:0007165,GO:0016301,GO:0008270
Bm068447	GO:0042184,GO:0046232,GO:0018874,GO:0055114,GO:0009712,GO:0019261,GO:0042203,GO:0005506,GO:0018576
Bm325299	GO:0006417,GO:0045182
Bm134141	GO:0008654,GO:0015991,GO:0015992,GO:0043772,GO:0015078,GO:0005886,GO:0033179
Bm248018	GO:0046983
Bm326185	GO:0042254,GO:0006412,GO:0003735,GO:0005840
Bm113140	GO:0003676
Bm217980	GO:0006120,GO:0006814,GO:0055085,GO:0006744,GO:0015992,GO:0042384,GO:0055114,GO:0008137,GO:0005515,GO:0016021,GO:0034464
Bm300349	GO:0055114,GO:0005507,GO:0016491
Bm132267	GO:0055114,GO:0016491,GO:0005507
Bm037812	GO:0006334,GO:0003677,GO:0000786,GO:0005634
Bm076868	GO:0006281,GO:0006308,GO:0000077,GO:0046872,GO:0000014
Bm084546	GO:0006013,GO:0006096,GO:0006094,GO:0006000,GO:0006012,GO:0006098,GO:0003872,GO:0005945
Bm178593	GO:0008270,GO:0005515
Bm126678	GO:0046872,GO:0000166
Bm295705	GO:0030150,GO:0005742
Bm264658	GO:0055085,GO:0022857,GO:0016021
Bm007228	GO:0035556
Bm315891	GO:0042254,GO:0006412,GO:0003735,GO:0071944,GO:0005840,GO:0005622,GO:0043231,GO:0016020
Bm046880	GO:0042254,GO:0006412,GO:0006629,GO:0003735,GO:0005840,GO:0005622
Bm233159	GO:0016192,GO:0006886,GO:0030131
Bm220936	GO:0016032
Bm327210	GO:0006874,GO:0030234,GO:0004190,GO:0030176,GO:0016021
Bm097694	GO:0019031
Bm172555	GO:0005634
Bm333732	GO:0006334,GO:0046982,GO:0003677,GO:0005634,GO:0000786
Bm295889	GO:0017004,GO:0020037
Bm150400	GO:0008152,GO:0019521,GO:0055114,GO:0006098,GO:0006269,GO:0006351,GO:0008270,GO:0004386,GO:0004616,GO:0051287,GO:0003896,GO:0016616,GO:0005657,GO:0005730
Bm179725	GO:0006355,GO:0031556,GO:0009088,GO:0031554,GO:0005524,GO:0005634
Bm149425	GO:0055114,GO:0006355,GO:0005524,GO:0016491,GO:0005634
Bm166301	GO:0006355,GO:0005524,GO:0005634
Bm149429	GO:0031554,GO:0031556,GO:0009088,GO:0006355,GO:0005524,GO:0005634
Bm018192	GO:0042302,GO:0016021
Bm240653	GO:0005975,GO:0004553
Bm210879	GO:0008408
Bm284500	GO:0046325
Bm261549	GO:0055085,GO:0006865,GO:0003333,GO:0006810,GO:0015171,GO:0016020
Bm322922	GO:0018106,GO:0000160,GO:0006355,GO:0007165,GO:0016310,GO:0005524,GO:0004871,GO:0004673,GO:0005634,GO:0009365,GO:0016021,GO:0005886
Bm119514	GO:0016567,GO:0032465,GO:0006915,GO:0004842
Bm016250	GO:0046439,GO:0006534,GO:0055114,GO:0019530,GO:0005506,GO:0017172
Bm133343	GO:0007275,GO:0006511,GO:0008270,GO:0005634
Bm105248	GO:0005515
Bm105249	GO:0005515
Bm191969	GO:0007165,GO:0004872,GO:0016021
Bm126233	GO:0005911
Bm128935	GO:0006265,GO:0003918,GO:0003677
Bm271225	GO:0006265,GO:0003677,GO:0003917,GO:0005694
Bm016282	GO:0006812,GO:0055085,GO:0008324,GO:0016020,GO:0016021
Bm166853	GO:0007155
Bm037004	GO:0006144,GO:0046034,GO:0005524,GO:0004017
Bm049030	GO:0003824
Bm159996	GO:0016020
Bm050367	GO:0042254,GO:0006412,GO:0003735,GO:0005840,GO:0005622
Bm330052	GO:0008152,GO:0008168
Bm047113	GO:0009058,GO:0016788
Bm262997	GO:0044238,GO:0044237,GO:0071704,GO:0005524,GO:0000166,GO:0017111,GO:0016887
Bm085275	GO:0016887,GO:0005524
Bm085274	GO:0005975,GO:0000166,GO:0017111,GO:0016887,GO:0004553,GO:0005524,GO:0003924,GO:0005525
Bm137664	GO:0005515
Bm265775	GO:0006886,GO:0016192,GO:0005515
Bm137672	GO:0007411,GO:0005515,GO:0016021
Bm252517	GO:0016747
Bm141682	GO:0032801,GO:0006812,GO:0019076,GO:0009405,GO:0005261,GO:0033644,GO:0005576
Bm172354	GO:0006412,GO:0042254,GO:0003735,GO:0005622,GO:0005840
Bm114387	GO:0006412,GO:0042254,GO:0003735,GO:0005622,GO:0005840
Bm332799	GO:0005515
Bm006781	GO:0046486,GO:0009395,GO:0008654,GO:0004143,GO:0016020
Bm172143	GO:0016021
Bm247159	GO:0015991,GO:0032780,GO:0006119,GO:0015992,GO:0080019,GO:0042030,GO:0046961,GO:0005739,GO:0033178
Bm303961	GO:0006810,GO:0005886
Bm283177	GO:0055085,GO:0006865,GO:0003333,GO:0006810,GO:0015171,GO:0016020
Bm158300	GO:0055114
Bm248816	GO:0005515,GO:0016020
Bm246148	GO:0005515
Bm181413	GO:0006914,GO:0007018,GO:0007017,GO:0008134,GO:0003777,GO:0005524,GO:0008092,GO:0042803,GO:0045502,GO:0008017,GO:0005667,GO:0045298,GO:0005737,GO:0030286,GO:0005874,GO:0019898
Bm261426	GO:0006810,GO:0005215,GO:0016020
Bm310695	GO:0046660,GO:0006397,GO:0005634
Bm106972	GO:0016021
Bm125080	GO:0006935,GO:0071973,GO:0046870,GO:0003774,GO:0009288,GO:0016020
Bm213982	GO:0071973,GO:0006935,GO:0046870,GO:0003774,GO:0009288,GO:0016020
Bm196846	GO:0006355,GO:0008270,GO:0043565,GO:0005515,GO:0003700,GO:0005634,GO:0005667
Bm286419	GO:0006000,GO:0006013,GO:0003873,GO:0005524
Bm291238	GO:0007165,GO:0005509,GO:0005515,GO:0005578
Bm140192	GO:0006508,GO:0004252
Bm032415	GO:0006813,GO:0030955,GO:0005515,GO:0005249,GO:0016021,GO:0008076
Bm292580	GO:0006412,GO:0042254,GO:0003735,GO:0016787,GO:0005622,GO:0005840
Bm066274	GO:0005789
Bm099500	GO:0006412,GO:0042254,GO:0003677,GO:0008270,GO:0046872,GO:0003735,GO:0005622,GO:0005840
Bm095546	GO:0005985,GO:0006075,GO:0005982,GO:0003843,GO:0000148,GO:0016020
Bm220999	GO:0005985,GO:0006075,GO:0005982,GO:0003843,GO:0000148,GO:0016020
Bm150305	GO:0008152,GO:0005542,GO:0016740
Bm070377	GO:0009405,GO:0006351,GO:0008270,GO:0003677,GO:0005634
Bm305330	GO:0000256,GO:0006144,GO:0050385
Bm202609	GO:0046872
Bm016972	GO:0046872
Bm016997	GO:0046872
Bm314276	GO:0046872
Bm061657	GO:0016020
Bm198583	GO:0005576
Bm257420	GO:0006508,GO:0008242,GO:0004197,GO:0016740
Bm073730	GO:0009094,GO:0006096,GO:0006094,GO:0006571,GO:0000162,GO:0004634,GO:0000287,GO:0000015
Bm308402	GO:0006621,GO:0046923,GO:0016021,GO:0005783
Bm037065	GO:0046487,GO:0009396,GO:0005524,GO:0004329
Bm140245	GO:0006694,GO:0015936,GO:0055114,GO:0004420,GO:0050662
Bm312783	GO:0006694,GO:0055114,GO:0015936,GO:0004420,GO:0050662
Bm154500	GO:0003677
Bm119786	GO:0006352,GO:0003677,GO:0005669
Bm000416	GO:0006508,GO:0004190
Bm318723	GO:0006355,GO:0016043,GO:0030036,GO:0051258,GO:0007165,GO:0007049,GO:0030168,GO:0005102,GO:0003700,GO:0030674,GO:0045502,GO:0003779,GO:0017048,GO:0042803,GO:0008134,GO:0048786,GO:0005577,GO:0030286,GO:0005667
Bm320355	GO:0005198
Bm197835	GO:0008152,GO:0016491
Bm057372	GO:0008152
Bm129016	GO:0019867
Bm058113	GO:0051262,GO:0005509
Bm155822	GO:0003676
Bm139071	GO:0008289
Bm103242	GO:0055114,GO:0006352,GO:0042773,GO:0006355,GO:0016987,GO:0003677,GO:0016651,GO:0003700,GO:0016020,GO:0005667
Bm014386	GO:0010038,GO:0019031,GO:0005840
Bm059092	GO:0042254,GO:0006412,GO:0003735,GO:0005840,GO:0005622
Bm054323	GO:0005515
Bm175412	GO:0005515
Bm274321	GO:0005515,GO:0005524,GO:0043531
Bm148847	GO:0001522,GO:0042254
Bm221919	GO:0042254,GO:0001522
Bm036764	GO:0042254,GO:0006412,GO:0003735,GO:0005730,GO:0005886,GO:0022627,GO:0005840,GO:0005622
Bm115980	GO:0019645,GO:0016021
Bm327846	GO:0016021,GO:0016020
Bm318565	GO:0006412,GO:0042254,GO:0003735,GO:0005622,GO:0005840
Bm093184	GO:0006865,GO:0055085,GO:0006810,GO:0003333,GO:0015171,GO:0016020
Bm125701	GO:0000398
Bm209342	GO:0007224,GO:0005515
Bm207832	GO:0005515
Bm122129	GO:0003676,GO:0004527
Bm273372	GO:0006123,GO:0015992,GO:0004129,GO:0045277
Bm212124	GO:0005515
Bm026035	GO:0003677,GO:0019013
Bm284837	GO:0016020
Bm065849	GO:0055114,GO:0006118,GO:0051537,GO:0009496,GO:0042651,GO:0009512
Bm290303	GO:0006281,GO:0008270,GO:0005515,GO:0046872
Bm219345	GO:0016021
Bm035894	GO:0016021
Bm282567	GO:0006812,GO:0016887,GO:0005509,GO:0016021
Bm120253	GO:0006144,GO:0006206,GO:0006351,GO:0003677,GO:0003899,GO:0005730
Bm051604	GO:0006351,GO:0006144,GO:0006206,GO:0003899,GO:0003677,GO:0005730
Bm236388	GO:0046983
Bm228956	GO:0003677
Bm228955	GO:0003677
Bm232518	GO:0045454,GO:0044781,GO:0006928,GO:0009288
Bm286518	GO:0006338,GO:0000228
Bm210659	GO:0046034,GO:0015992,GO:0005524
Bm315118	GO:0005576
Bm164251	GO:0042254,GO:0006412,GO:0003735,GO:0019843,GO:0005840
Bm313752	GO:0006825,GO:0042254,GO:0006412,GO:0019843,GO:0005507,GO:0016531,GO:0003735,GO:0005758,GO:0005840,GO:0005622
Bm313742	GO:0006412,GO:0042254,GO:0003735,GO:0019843,GO:0005840
Bm313746	GO:0042254,GO:0006412,GO:0003735,GO:0019843,GO:0005840,GO:0005622
Bm043888	GO:0008152,GO:0006508,GO:0008236,GO:0016787
Bm020481	GO:0006414,GO:0006448,GO:0003746,GO:0005840,GO:0005853
Bm041169	GO:0045881,GO:0008201,GO:0000166,GO:0003677,GO:0003676,GO:0008408,GO:0019013
Bm034773	GO:0006955,GO:0030153,GO:0006260,GO:0000166,GO:1901363,GO:0003677,GO:0016740,GO:0003887,GO:0015643,GO:0097159,GO:0008201,GO:0008270,GO:0008408,GO:0003676,GO:0005634,GO:0019013,GO:0019814,GO:0042575
Bm057973	GO:0006614,GO:0008312,GO:0048500
Bm178321	GO:0055114,GO:0016151,GO:0051287,GO:0048038,GO:0016651
Bm198044	GO:0000746,GO:0015628,GO:0015031,GO:0003677,GO:0008565,GO:0015627
Bm267757	GO:0030001,GO:0055085,GO:0046873,GO:0016020
Bm081393	GO:0005515
Bm041239	GO:0008152,GO:0003824,GO:0008270,GO:0016021
Bm013799	GO:0006950,GO:0009628,GO:0008270,GO:0003676
Bm269225	GO:0006468,GO:0016567,GO:0005524,GO:0004842,GO:0004672,GO:0016772,GO:0005680
Bm237677	GO:0055114,GO:0016717
Bm086742	GO:0032784,GO:0003677
Bm148004	GO:0055114,GO:0005506,GO:0016702,GO:0016706,GO:0031418,GO:0016023
Bm049578	GO:0007165,GO:0006171,GO:0006144,GO:0000287,GO:0004016,GO:0031224
Bm120927	GO:0006334,GO:0003677,GO:0005634,GO:0001533,GO:0000786
Bm263484	GO:0055114,GO:0008168
Bm333669	GO:0006448,GO:0006414,GO:0003746,GO:0005840
Bm289096	GO:0042254,GO:0006412,GO:0043066,GO:0019079,GO:0043154,GO:0003735,GO:0005840,GO:0071986,GO:0005737
Bm154371	GO:0006352,GO:0003677,GO:0005634
Bm114031	GO:0006865,GO:2001256,GO:0030176,GO:0016020,GO:0016021,GO:0019031
Bm065032	GO:0016757
Bm192568	GO:0008152,GO:0016746
Bm283801	GO:0051607,GO:0048870,GO:0008053,GO:0009069,GO:0016310,GO:0006858,GO:0006397,GO:0006914,GO:0006357,GO:0006468,GO:0008092,GO:0005524,GO:0003924,GO:0004674,GO:0001104,GO:0008017,GO:0031514,GO:0016021,GO:0005741,GO:0019898,GO:0016592,GO:0000445,GO:0045298,GO:0005737
Bm325648	GO:0042254,GO:0005634
Bm023861	GO:0042254,GO:0005634
Bm116232	GO:0015031,GO:0008565,GO:0016021
Bm116231	GO:0008033,GO:0006364,GO:0008168,GO:0003723
Bm049967	GO:0007264,GO:0008152,GO:0043087,GO:0005085,GO:0008168
Bm177408	GO:0055114,GO:0016491
Bm195757	GO:0006694,GO:0006397,GO:0006396,GO:0016125,GO:0047750,GO:0005515,GO:0016021,GO:0005634,GO:0005622
Bm248683	GO:0016567,GO:0008270,GO:0005515,GO:0004842,GO:0046872,GO:0005680
Bm288337	GO:0006810,GO:0055085,GO:0003333,GO:0006865,GO:0015171,GO:0005739,GO:0016020,GO:0005747
Bm090788	GO:0005198
Bm022890	GO:0008270,GO:0016020
Bm034927	GO:0019028
Bm108862	GO:0006355,GO:0007275,GO:0003677,GO:0008270,GO:0016818,GO:0005524,GO:0005634
Bm224834	GO:0016020
Bm200500	GO:0005515
Bm115121	GO:0046872,GO:0005515
Bm137294	GO:0060478,GO:0007342,GO:0006897,GO:0007165,GO:0004871,GO:0005887,GO:0016021,GO:0005886
Bm132575	GO:0016021
Bm252118	GO:0007165,GO:0006605
Bm166403	GO:0006112
Bm091947	GO:0006955,GO:0043039,GO:0000902,GO:0005524,GO:0016876,GO:0016020
Bm198790	GO:0008615,GO:0033856,GO:0005737
Bm100539	GO:0006118,GO:0020037,GO:0003677,GO:0009055,GO:0008270
Bm002176	GO:0006886,GO:0030176
Bm236192	GO:0006810,GO:0016021
Bm006829	GO:0046999,GO:0016021,GO:0019867
Bm192595	GO:0016310,GO:0009069,GO:0006338,GO:0097159,GO:0004674,GO:0016818,GO:0003676,GO:0005524,GO:1901363,GO:0005634
Bm069334	GO:0006468,GO:0016773,GO:0005524,GO:0004672,GO:0016020
Bm312792	GO:0006206,GO:0006351,GO:0008152,GO:0006144,GO:0003824,GO:0003899,GO:0003677,GO:0005730
Bm183012	GO:0015886,GO:0006367,GO:0017004,GO:0005198,GO:0004222,GO:0016021,GO:0005672
Bm325753	GO:0034968,GO:0006554,GO:0006479,GO:0006355,GO:0018024,GO:0005694
Bm147017	GO:0006804,GO:0006979,GO:0004601
Bm311659	GO:0009877,GO:0016746,GO:0005829
Bm125843	GO:0006457,GO:0000774,GO:0042803,GO:0051087
Bm125844	GO:0006457,GO:0051087,GO:0000774,GO:0042803
Bm109070	GO:0035091
Bm253082	GO:0008270,GO:0003676
Bm052735	GO:0005198,GO:0019013
Bm064204	GO:0008270
Bm156707	GO:0007009,GO:0006412,GO:0042254,GO:0003735,GO:0005622,GO:0005840
Bm299872	GO:0030178,GO:0007275,GO:0005576
Bm299871	GO:0030178,GO:0007275,GO:0005576
Bm203013	GO:0005524
Bm276992	GO:0003677,GO:0003676,GO:0016787,GO:0005524
Bm295568	GO:0005515
Bm054306	GO:0015074,GO:0006313,GO:0003677
Bm330186	GO:0042254,GO:0001522
Bm183946	GO:0009405,GO:0009271,GO:0006355,GO:0007165,GO:0055085,GO:0006308,GO:0030001,GO:0046873,GO:0004872,GO:0008855,GO:0016020,GO:0016021,GO:0009318
Bm089823	GO:0006352,GO:0003677,GO:0005634
Bm153370	GO:0003723,GO:0008270
Bm184583	GO:0042254,GO:0006412,GO:0003723,GO:0005524,GO:0003735,GO:0005840,GO:0005622
Bm019088	GO:0007165,GO:0005179,GO:0005576
Bm248086	GO:0030071,GO:1900758,GO:0005515,GO:0005680
Bm248085	GO:0030071,GO:1900758,GO:0005515,GO:0005680
Bm142059	GO:0030036,GO:0003779,GO:0005737,GO:0015629
Bm105788	GO:0005515
Bm279081	GO:0019521,GO:0006098,GO:0055114,GO:0004616,GO:0050661
Bm015287	GO:0006508,GO:0005515,GO:0004197
Bm286039	GO:0006457,GO:0006260,GO:0006308,GO:0010508,GO:0006323,GO:0015991,GO:0006914,GO:0008608,GO:0007049,GO:0007015,GO:0008053,GO:0006897,GO:0006810,GO:0007264,GO:0015992,GO:0008855,GO:0015078,GO:0042803,GO:0005096,GO:0003924,GO:0051087,GO:0000774,GO:0005215,GO:0016021,GO:0005741,GO:0005876,GO:0033179,GO:0009318,GO:0005634,GO:0042729
Bm261029	GO:0008270,GO:0005515
Bm175323	GO:0006810,GO:0055085,GO:0016020
Bm077858	GO:0008152,GO:0008484,GO:0033691,GO:0003824
Bm110674	GO:0016021
Bm154392	GO:0006206,GO:0006144,GO:0006351,GO:0003677,GO:0003899,GO:0005730
Bm062048	GO:0006508,GO:0006865,GO:0003333,GO:0006144,GO:0055085,GO:0044419,GO:0006810,GO:0003968,GO:0017111,GO:0004197,GO:0015171,GO:0031379,GO:0016020
Bm003818	GO:0006810,GO:0055085,GO:0003333,GO:0006865,GO:0015031,GO:0015171,GO:0008565,GO:0016021,GO:0016020
Bm333790	GO:0055085,GO:0022857,GO:0016021
Bm212200	GO:0042802,GO:0005515
Bm263402	GO:0007291
Bm137069	GO:0005515
Bm170776	GO:0016310,GO:0071555,GO:0000160,GO:0004673,GO:0000155,GO:0016747,GO:0016021,GO:0009365
Bm230069	GO:0015991,GO:0016820,GO:0000221
Bm180256	GO:0016491
Bm213951	GO:0008152,GO:0019058,GO:0016791,GO:0003824,GO:0046872
Bm146429	GO:0042254,GO:0006412,GO:0003735,GO:0005840,GO:0005622
Bm244425	GO:0005615
Bm289777	GO:0005515
Bm155819	GO:0043044,GO:0006338,GO:0005524,GO:0005488,GO:0031491,GO:0003676,GO:0016818,GO:0005634,GO:0000785
Bm155814	GO:0006412,GO:0042254,GO:0003735,GO:0005622,GO:0005840
Bm233484	GO:0017111,GO:0005524
Bm103372	GO:0006626,GO:0005741
Bm231501	GO:0016020
Bm184283	GO:0015986,GO:0015992,GO:0006119,GO:0015991,GO:0007050,GO:0045859,GO:0004861,GO:0046961,GO:0015078,GO:0051082,GO:0005634,GO:0033178,GO:0045263,GO:0005737
Bm250672	GO:0055085,GO:0015979,GO:0016020,GO:0009539,GO:0009523,GO:0016021
Bm311949	GO:0009116,GO:0006144,GO:0003877
Bm212383	GO:0004519
Bm071369	GO:0005975,GO:0000105,GO:0006537,GO:0006807,GO:0055114,GO:0003824,GO:0016627,GO:0015930,GO:0016638,GO:0016857,GO:0018580,GO:0016491,GO:0005737
Bm071370	GO:0006807,GO:0006537,GO:0055114,GO:0000105,GO:0005975,GO:0016491,GO:0016638,GO:0015930,GO:0016857,GO:0018580,GO:0003824,GO:0016627,GO:0005737
Bm212560	GO:0000105,GO:0055114,GO:0006537,GO:0007275,GO:0005975,GO:0006807,GO:0006119,GO:0015992,GO:0006118,GO:0016857,GO:0016638,GO:0003824,GO:0016491,GO:0018580,GO:0015930,GO:0016627,GO:0008121,GO:0009055,GO:0005578,GO:0005737
Bm200256	GO:0008270,GO:0005515
Bm200255	GO:0005982,GO:0005985,GO:0030245,GO:0008810,GO:0016020
Bm256576	GO:0006364,GO:0005730
Bm149539	GO:0055114,GO:0006633,GO:0016491,GO:0005506
Bm086493	GO:0005515
Bm147762	GO:0008270
Bm100191	GO:0051028,GO:0003824,GO:0016020,GO:0005634
Bm000259	GO:0030435,GO:0004866,GO:0031160,GO:0016021
Bm186023	GO:0009231,GO:0016740,GO:0009349
Bm077191	GO:0008033,GO:0008168
Bm058846	GO:0055085,GO:0022857,GO:0016021
Bm304039	GO:0008270
Bm110484	GO:0030247
Bm111145	GO:0006810,GO:0055085,GO:0016020
Bm090564	GO:0000413,GO:0006457,GO:0003755
Bm131001	GO:0035556
Bm320258	GO:0055114,GO:0016702
Bm152736	GO:0006260,GO:0006886,GO:0016192,GO:0005198,GO:0005515,GO:0016020,GO:0005634,GO:0030126
Bm329049	GO:0016020,GO:0019028
Bm178041	GO:0006396,GO:0005524,GO:0005525,GO:0016887,GO:0008452,GO:0000166,GO:0003677
Bm272310	GO:0005515
Bm121640	GO:0005507
Bm110643	GO:0006468,GO:0004672,GO:0005524
Bm181008	GO:0006886,GO:0016192,GO:0005515,GO:0005198,GO:0030117
Bm323236	GO:0006468,GO:0016773,GO:0005524,GO:0005515,GO:0004672,GO:0016020
Bm052667	GO:0009536
Bm335697	GO:0055114,GO:0016491,GO:0050662
Bm335711	GO:0055114,GO:0016491,GO:0050662
Bm085037	GO:0000166
Bm141974	GO:0006568,GO:0042207,GO:0018874,GO:0006412,GO:0042254,GO:0003735,GO:0018822,GO:0005840
Bm212545	GO:0031023,GO:0008207,GO:0008210,GO:0006694,GO:0051225,GO:0055114,GO:0008209,GO:0008152,GO:0003824,GO:0016616,GO:0016491,GO:0003854,GO:0050662
Bm288227	GO:0008033,GO:0008152,GO:0009451,GO:0006400,GO:0008168,GO:0008176
Bm300201	GO:0008270,GO:0004222,GO:0005615
Bm137087	GO:0006886,GO:0005741
Bm252017	GO:0005515
Bm210426	GO:0006206,GO:0006144,GO:0006351,GO:0003677,GO:0005488,GO:0003899,GO:0005730
Bm139684	GO:0007264,GO:0015992,GO:0046034,GO:0043531,GO:0005524,GO:0003924,GO:0005525
Bm139669	GO:0015991,GO:0016820,GO:0033178
Bm266557	GO:0006367,GO:0005672
Bm328103	GO:0000902
Bm280999	GO:0042254,GO:0006412,GO:0003735,GO:0005840
Bm217411	GO:0000105,GO:0006547,GO:0004635
Bm331089	GO:0001527
Bm193817	GO:0008152,GO:0016746
Bm083368	GO:0008270,GO:0005515
Bm021246	GO:0005509
Bm110213	GO:0006118,GO:0003954,GO:0005739
Bm245775	GO:0009405
Bm245746	GO:0006605,GO:0006886,GO:0003924,GO:0005525,GO:0005047,GO:0005785,GO:0071203,GO:0005742,GO:0005786
Bm053177	GO:0005515
Bm169853	GO:0045454
Bm269499	GO:0006118,GO:0005507,GO:0009055
Bm277108	GO:0009405,GO:0008053,GO:0006952,GO:0006886,GO:0006810,GO:0003924,GO:0019855,GO:0005576,GO:0016020,GO:0005741,GO:0016021,GO:0005801
Bm179482	GO:0016020
Bm029704	GO:0007049,GO:0006308,GO:0032801,GO:0006812,GO:0019076,GO:0008855,GO:0005261,GO:0009318,GO:0033644,GO:0016020,GO:0005887
Bm130687	GO:0019236,GO:0007606,GO:0007186,GO:0004932,GO:0005886,GO:0016020
Bm207537	GO:0055085,GO:0016021
Bm034343	GO:0006810,GO:0055085,GO:0009312,GO:0009877,GO:0042626,GO:0008757,GO:0005524,GO:0016021
Bm312693	GO:0006874,GO:0006814,GO:0006351,GO:0006260,GO:0006206,GO:0006364,GO:0006270,GO:0006355,GO:0009236,GO:0006383,GO:0006816,GO:0006144,GO:0006352,GO:0016987,GO:0003700,GO:0005219,GO:0003899,GO:0003677,GO:0005248,GO:0003887,GO:0001518,GO:0016021,GO:0034457,GO:0005634,GO:0005730,GO:0032040,GO:0005732,GO:0042575,GO:0005666,GO:0005667,GO:0005622,GO:0005789
Bm221954	GO:0006464,GO:0055114,GO:0008113
Bm209751	GO:0006537,GO:0055114,GO:0007186,GO:0000105,GO:0007165,GO:0006807,GO:0006051,GO:0006040,GO:0016491,GO:0003824,GO:0047465,GO:0016638,GO:0004871,GO:0018580,GO:0015930,GO:0005834
Bm250912	GO:0005515,GO:0016021
Bm192350	GO:0042254,GO:0006412,GO:0006284,GO:0016799,GO:0003735,GO:0003906,GO:0005840
Bm256894	GO:0005515
Bm260699	GO:0016788
Bm180249	GO:0006260,GO:0006351,GO:0007275,GO:0003677,GO:0008270,GO:0003887,GO:0005634,GO:0042575,GO:0042600
Bm045078	GO:0051016,GO:0030479
Bm162798	GO:0046872
Bm177494	GO:0006448,GO:0045905,GO:0006452,GO:0045901,GO:0003723,GO:0003746,GO:0043022,GO:0005840
Bm123895	GO:0008146
Bm336665	GO:0008152,GO:0003824,GO:0009505
Bm100620	GO:0006412,GO:0042254,GO:0003735,GO:0005840,GO:0015934
Bm006861	GO:0051016,GO:0008290
Bm254238	GO:0009117,GO:0000287,GO:0008253,GO:0000166,GO:0003677,GO:0005737
Bm067854	GO:0006810,GO:0005887,GO:0016021
Bm048277	GO:0003677,GO:0003682,GO:0000785
Bm288582	GO:0055114,GO:0016491,GO:0050660
Bm288581	GO:0055114,GO:0050660,GO:0016491
Bm288583	GO:0055114,GO:0016491,GO:0050660
Bm137523	GO:0006260,GO:0005515,GO:0003677
Bm170617	GO:0006364
Bm109368	GO:0008152,GO:0016747
Bm214627	GO:0016989
Bm225203	GO:0003676
Bm065141	GO:0006206,GO:0006260,GO:0009755,GO:0006355,GO:0006412,GO:0042254,GO:0055114,GO:0003735,GO:0005515,GO:0008998,GO:0016491,GO:0005576,GO:0005634,GO:0005622,GO:0005840
Bm100230	GO:0006464,GO:0009452,GO:0031167,GO:0006396,GO:0006304,GO:0006479,GO:0001510,GO:0009451,GO:0009312,GO:0008152,GO:0006306,GO:0009877,GO:0046500,GO:0003824,GO:0004719,GO:0003677,GO:0008170,GO:0008173,GO:0008757,GO:0008168
Bm195383	GO:0032259,GO:0000372,GO:0008168,GO:0030529
Bm071848	GO:0032259,GO:0008168
Bm151066	GO:0032259,GO:0001510,GO:0008168
Bm014813	GO:0006412,GO:0042254,GO:0003735,GO:0005622,GO:0005840
Bm165341	GO:0009405,GO:0007165,GO:0007268,GO:0030550,GO:0005576,GO:0019028
Bm182855	GO:0042742,GO:0005576
Bm229742	GO:0005509
Bm023137	GO:0006468,GO:0004672,GO:0005524
Bm226990	GO:0006468,GO:0004672,GO:0005524
Bm149746	GO:0009788,GO:0016310,GO:0009069,GO:0006468,GO:0016773,GO:0004674,GO:0004672,GO:0005524,GO:0016020
Bm186512	GO:0030246
Bm290356	GO:0016021
Bm266865	GO:0006508,GO:0008236,GO:0005576
Bm301360	GO:0005515
Bm081466	GO:0007010,GO:0003779,GO:0003824
Bm269878	GO:0055114,GO:0006520,GO:0016491
Bm229322	GO:0055114,GO:0055085,GO:0008270,GO:0016638,GO:0016021
Bm086571	GO:0007186,GO:0006284,GO:0007165,GO:0004871,GO:0005834
Bm164863	GO:0006260,GO:0003677,GO:0005664
Bm275352	GO:0006412,GO:0006508,GO:0042254,GO:0003735,GO:0004252,GO:0005622,GO:0005840
Bm213167	GO:0006810,GO:0005975,GO:0006807,GO:0009405,GO:0016810,GO:0008061,GO:0008200,GO:0005576
Bm082202	GO:0051603,GO:0004298,GO:0005839
Bm266295	GO:0006744,GO:0015992,GO:0006120,GO:0055114,GO:0006814,GO:0008137
Bm297944	GO:0017148,GO:0030598
Bm011124	GO:0006418,GO:0004812,GO:0005524
Bm243729	GO:0005515
Bm172599	GO:0071203
Bm022086	GO:0006412,GO:0042254,GO:0003735,GO:0005840
Bm009470	GO:0006886,GO:0016192,GO:0005198,GO:0030117
Bm191236	GO:0016567,GO:0004842
Bm166053	GO:0010080,GO:0016310,GO:0009069,GO:0048833,GO:0006468,GO:0005515,GO:0004713,GO:0004674,GO:0005524,GO:0004672,GO:0016020
Bm166052	GO:0005515
Bm294488	GO:0042254,GO:0006412,GO:0003735,GO:0005840,GO:0005622
Bm283975	GO:0006260,GO:0003688,GO:0046809
Bm230513	GO:0005515,GO:0008270
Bm260744	GO:0006334,GO:0030261,GO:0008641,GO:0003677,GO:0042302,GO:0000786,GO:0005634
Bm007784	GO:0030261,GO:0003677
Bm130093	GO:0042246,GO:0007155,GO:0016021
Bm138133	GO:0006355,GO:0003700,GO:0005667
Bm138131	GO:0007031,GO:0005779
Bm251664	GO:0042254,GO:0007165,GO:0006412,GO:0003735,GO:0005125,GO:0005840,GO:0005622
Bm227706	GO:0008152,GO:0030001,GO:0046872
Bm123660	GO:0006811,GO:0055085,GO:0044765,GO:0005216,GO:0016020
Bm124028	GO:0000160,GO:0016310,GO:0007165,GO:0000155,GO:0009365
Bm293144	GO:0055085,GO:0006810,GO:0005215,GO:0022857,GO:0016021,GO:0016020
Bm023442	GO:0019882,GO:0055085,GO:0006810,GO:0006955,GO:0005215,GO:0016021,GO:0016020
Bm095423	GO:0016787
Bm071717	GO:0005515,GO:0005509
Bm243837	GO:0007264,GO:0005525
Bm033695	GO:0015992,GO:0006119,GO:0015986,GO:0046961,GO:0046933,GO:0000275,GO:0045259
Bm066386	GO:0042254,GO:0006412,GO:0003735,GO:0005730,GO:0005840,GO:0005622,GO:0022625
Bm245626	GO:0006120,GO:0006814,GO:0015992,GO:0006118,GO:0006744,GO:0008137,GO:0009055,GO:0016020
Bm230881	GO:0006914,GO:0070206,GO:0010508,GO:0033926,GO:0042803,GO:0045502,GO:0008134,GO:0030286,GO:0005667
Bm324099	GO:0006260,GO:0003697,GO:0042025
Bm051335	GO:0006118,GO:0045454,GO:0009055,GO:0015035,GO:0005515
Bm186285	GO:0005975,GO:0004553
Bm117074	GO:0009405,GO:0006810,GO:0008200,GO:0005576
Bm190928	GO:0008152,GO:0016846
Bm179754	GO:0008270,GO:0003676
Bm219570	GO:0005515
Bm220050	GO:0006810,GO:0055085,GO:0016020
Bm075497	GO:0046488,GO:0016307
Bm327802	GO:0055085,GO:0006812,GO:0008324,GO:0016021,GO:0016020
Bm080930	GO:0009555,GO:0006915,GO:0006919,GO:0005739
Bm276564	GO:0042720
Bm158588	GO:0007165,GO:0031704,GO:0005179,GO:0019033
Bm312897	GO:0015743,GO:0006270,GO:0055085,GO:0006260,GO:0030001,GO:0019915,GO:0006367,GO:0032968,GO:0046873,GO:0004190,GO:0003677,GO:0005789,GO:0016021,GO:0016020,GO:0005634
Bm130063	GO:0008270,GO:0046983
Bm034962	GO:0042254,GO:0003735,GO:0005840
Bm327731	GO:0008152,GO:0016747
Bm107134	GO:0006955,GO:0007186,GO:0007165,GO:0030247,GO:0005198,GO:0004930,GO:0005044,GO:0019028,GO:0016021,GO:0019031
Bm322436	GO:0009058,GO:0016740,GO:0003677,GO:0005634
Bm315802	GO:0009058,GO:0016740
Bm266061	GO:0003723
Bm079690	GO:0007021,GO:0008033,GO:0006810,GO:0016853,GO:0015631,GO:0051082,GO:0030288,GO:0045298
Bm032980	GO:0006446,GO:0003743,GO:0005737,GO:0005840,GO:0005852
Bm051290	GO:0005515
Bm279446	GO:0045735
Bm202102	GO:0006542,GO:0009252,GO:0009651,GO:0046686,GO:0006807,GO:0004356,GO:0005524,GO:0005739,GO:0009570,GO:0009535,GO:0022626,GO:0048046,GO:0009941
Bm086722	GO:0007049
Bm160853	GO:0006468,GO:0004672,GO:0005515,GO:0005524,GO:0008270
Bm174560	GO:0016757
Bm085011	GO:0005639
Bm173603	GO:0006355,GO:0003700,GO:0005667
Bm018253	GO:0055085,GO:0006810,GO:0009405,GO:0006865,GO:0019835,GO:0003333,GO:0015171,GO:0019867,GO:0016020
Bm087561	GO:0009166,GO:0016787
Bm033694	GO:0006412,GO:0042254,GO:0003735,GO:0005840
Bm140762	GO:0006412,GO:0009058,GO:0042254,GO:0003735,GO:0016740,GO:0005622,GO:0005840
Bm250803	GO:0042254,GO:0006412,GO:0003735,GO:0005840,GO:0005622
Bm204885	GO:0048306
Bm222578	GO:0005985,GO:0009058,GO:0009250,GO:0005982,GO:0009011
Bm312118	GO:0044699
Bm137487	GO:0006364,GO:0031167,GO:0008152,GO:0008033,GO:0032259,GO:0008168,GO:0003723,GO:0016746
Bm189627	GO:0008168
Bm161334	GO:0008152,GO:0032259,GO:0016491,GO:0008168,GO:0050662,GO:0003824
Bm319527	GO:0006396,GO:0005515
Bm053941	GO:0006412,GO:0042254,GO:0003735,GO:0016020,GO:0022625,GO:0005622,GO:0005840
Bm247337	GO:0010508
Bm182846	GO:0015031,GO:0006886,GO:0007049,GO:0070206,GO:0005515,GO:0008565,GO:0016020,GO:0005737
Bm012028	GO:0055114,GO:0046872,GO:0020037,GO:0016705,GO:0005506,GO:0016491
Bm303331	GO:0019072,GO:0042025
Bm028733	GO:0009058,GO:0030170
Bm077328	GO:0007264,GO:0006810,GO:0006281,GO:0002949,GO:0007165,GO:0006310,GO:0003723,GO:0031704,GO:0009378,GO:0016740,GO:0005179,GO:0003724,GO:0019204,GO:0098519,GO:0043531,GO:0017111,GO:0016887,GO:0005525,GO:0005524,GO:0009379,GO:0005657
Bm295148	GO:0000746,GO:0016818,GO:0003677,GO:0003678,GO:0005524,GO:0005657
Bm066214	GO:0046500,GO:0008152,GO:0006480,GO:0006479,GO:0006464,GO:0008168,GO:0008171,GO:0004719
Bm314910	GO:0006412,GO:0042254,GO:0003735,GO:0015934,GO:0005840
Bm060326	GO:0006886,GO:0016192,GO:0044763,GO:0006508,GO:0004222,GO:0005198,GO:0000166,GO:0005861,GO:0030130,GO:0043234,GO:0030132
Bm323897	GO:0005515
Bm261993	GO:0009847,GO:0007165,GO:0050750,GO:0008270,GO:0008201,GO:0003677,GO:0016021,GO:0005783
Bm194086	GO:0015031,GO:0006464,GO:0005515
Bm071080	GO:0019069,GO:0006508,GO:0004198,GO:0042025,GO:0005622
Bm103081	GO:0007219,GO:0045944,GO:0003713,GO:0005515,GO:0016607,GO:0005667
Bm013644	GO:0005515
Bm134606	GO:0015992,GO:0006119,GO:0015986,GO:0046961,GO:0005524,GO:0046933,GO:0005515,GO:0000275,GO:0045259
Bm222548	GO:0005524
Bm124928	GO:0015074
Bm119171	GO:0005515,GO:0003676,GO:0008270
Bm314463	GO:0006400,GO:0009451,GO:0008033,GO:0008168,GO:0008176,GO:0008171
Bm049060	GO:0042254,GO:0006412,GO:0046872,GO:0003735,GO:0005840,GO:0005622
Bm181866	GO:0003676
Bm223396	GO:0015992,GO:0015986,GO:0015078,GO:0000276
Bm272887	GO:0006457,GO:0000413,GO:0003755
Bm272886	GO:0000413,GO:0006457,GO:0003755
Bm090897	GO:0003723
Bm280139	GO:0006468,GO:0004672,GO:0005524
Bm278214	GO:0042393,GO:0005634
Bm232633	GO:0050794,GO:0006950,GO:0044763,GO:0005737,GO:0043231,GO:0016020
Bm312959	GO:0055085,GO:0016021
Bm063145	GO:0007155
Bm021298	GO:0006265,GO:0006270,GO:0015992,GO:0006886,GO:0015986,GO:0005047,GO:0003918,GO:0003677,GO:0015078,GO:0005524,GO:0005525,GO:0003924,GO:0005786,GO:0000276,GO:0005634,GO:0005785
[truncated: 168,575 more rows]
