# Supplementary material for: Variability in Leaf Color Induced by Chlorophyll Deficiency: Transcriptional Changes in Bamboo Leaves
Source: Preprints.org preprint supplement (doi:10.20944/preprints202311.0939.v2), 2023-12-27
Supplement: Supplementary file 2 [file supplementary › Table S6.tsv]

#Geneid	KEGG	KEGG_description	Pathwayid	Pathway_description
Bm000001	K04382	PPP2C; serine/threonine-protein phosphatase 2A catalytic subunit [EC:3.1.3.16]	ko03015	mRNA surveillance pathway
Bm000009	K12130	PRR5; pseudo-response regulator 5	ko04712	Circadian rhythm - plant
Bm000010	K02872	RP-L13Ae, RPL13A; large subunit ribosomal protein L13Ae	ko03010	Ribosome
Bm000012	K02872	RP-L13Ae, RPL13A; large subunit ribosomal protein L13Ae	ko03010	Ribosome
Bm000013	K02872	RP-L13Ae, RPL13A; large subunit ribosomal protein L13Ae	ko03010	Ribosome
Bm000018	K02900	RP-L27Ae, RPL27A; large subunit ribosomal protein L27Ae	ko03010	Ribosome
Bm000019	K02900	RP-L27Ae, RPL27A; large subunit ribosomal protein L27Ae	ko03010	Ribosome
Bm000021	K12795	SUGT1, SGT1; suppressor of G2 allele of SKP1	ko04626	Plant-pathogen interaction
Bm000028	K02997	RP-S9e, RPS9; small subunit ribosomal protein S9e	ko03010	Ribosome
Bm000029	K01895	ACSS1_2, acs; acetyl-CoA synthetase [EC:6.2.1.1]	ko00010	Glycolysis / Gluconeogenesis
Bm000036	K01895	ACSS1_2, acs; acetyl-CoA synthetase [EC:6.2.1.1]	ko00010	Glycolysis / Gluconeogenesis
Bm000051	K02734	PSMB2; 20S proteasome subunit beta 4 [EC:3.4.25.1]	ko03050	Proteasome
Bm000054	K02866	RP-L10e, RPL10; large subunit ribosomal protein L10e	ko03010	Ribosome
Bm000056	K00326	CYB5R; cytochrome-b5 reductase [EC:1.6.2.2]	ko00520	Amino sugar and nucleotide sugar metabolism
Bm000065	K00326	CYB5R; cytochrome-b5 reductase [EC:1.6.2.2]	ko00520	Amino sugar and nucleotide sugar metabolism
Bm000066	K03639	moaA, CNX2; GTP 3',8-cyclase [EC:4.1.99.22]	ko04122	Sulfur relay system
Bm000070	K02877	RP-L15e, RPL15; large subunit ribosomal protein L15e	ko03010	Ribosome
Bm000071	K12896	SRSF7, SFRS7; serine/arginine-rich splicing factor 7	ko03040	Spliceosome
Bm000085	K15404	K15404, CER1; aldehyde decarbonylase [EC:4.1.99.5]	ko00073	Cutin, suberine and wax biosynthesis
Bm000086	K01956	carA, CPA1; carbamoyl-phosphate synthase small subunit [EC:6.3.5.5]	ko00250	Alanine, aspartate and glutamate metabolism
Bm000099	K03264	EIF6; translation initiation factor 6	ko03008	Ribosome biogenesis in eukaryotes
Bm000102	K08241	E2.1.1.141; jasmonate O-methyltransferase [EC:2.1.1.141]	ko00592	alpha-Linolenic acid metabolism
Bm000128	K01899	LSC1; succinyl-CoA synthetase alpha subunit [EC:6.2.1.4 6.2.1.5]	ko00020	Citrate cycle
Bm000143	K18464	RTSC, SPG8; WASH complex subunit strumpellin	ko04144	Endocytosis
Bm000173	K11984	SART1, HAF, SNU66; U4/U6.U5 tri-snRNP-associated protein 1	ko03040	Spliceosome
Bm000179	K01897	ACSL, fadD; long-chain acyl-CoA synthetase [EC:6.2.1.3]	ko04146	Peroxisome
Bm000180	K03847	ALG12; alpha-1,6-mannosyltransferase [EC:2.4.1.260]	ko00510	N-Glycan biosynthesis
Bm000182	K13648	GAUT; alpha-1,4-galacturonosyltransferase [EC:2.4.1.43]	ko00500	Starch and sucrose metabolism
Bm000185	K02978	RP-S27e, RPS27; small subunit ribosomal protein S27e	ko03010	Ribosome
Bm000191	K13412	CPK; calcium-dependent protein kinase [EC:2.7.11.1]	ko04626	Plant-pathogen interaction
Bm000193	K13412	CPK; calcium-dependent protein kinase [EC:2.7.11.1]	ko04626	Plant-pathogen interaction
Bm000207	K03135	TAF11; transcription initiation factor TFIID subunit 11	ko03022	Basal transcription factors
Bm000208	K03135	TAF11; transcription initiation factor TFIID subunit 11	ko03022	Basal transcription factors
Bm000211	K01895	ACSS1_2, acs; acetyl-CoA synthetase [EC:6.2.1.1]	ko00010	Glycolysis / Gluconeogenesis
Bm000218	K14308	NUP54, NUP57; nuclear pore complex protein Nup54	ko03013	Nucleocytoplasmic transport
Bm000226	K03113	EIF1, SUI1; translation initiation factor 1	ko03013	Nucleocytoplasmic transport
Bm000229	K01893	NARS, asnS; asparaginyl-tRNA synthetase [EC:6.1.1.22]	ko00970	Aminoacyl-tRNA biosynthesis
Bm000248	K10950	ERO1L; ERO1-like protein alpha [EC:1.8.4.-]	ko04141	Protein processing in endoplasmic reticulum
Bm000251	K03965	NDUFB9; NADH dehydrogenase (ubiquinone) 1 beta subcomplex subunit 9	ko00190	Oxidative phosphorylation
Bm000258	K02958	RP-S15e, RPS15; small subunit ribosomal protein S15e	ko03010	Ribosome
Bm000267	K02377	TSTA3, fcl; GDP-L-fucose synthase [EC:1.1.1.271]	ko00051	Fructose and mannose metabolism
Bm000273	K00600	glyA, SHMT; glycine hydroxymethyltransferase [EC:2.1.2.1]	ko00260	Glycine, serine and threonine metabolism
Bm000274	K12309	GLB1, ELNR1; beta-galactosidase [EC:3.2.1.23]	ko00052	Galactose metabolism
Bm000277	K13412	CPK; calcium-dependent protein kinase [EC:2.7.11.1]	ko04626	Plant-pathogen interaction
Bm000282	K12890	SRSF1, SFRS1, ASF, SF2; serine/arginine-rich splicing factor 1	ko03040	Spliceosome
Bm000284	K02887	RP-L20, MRPL20, rplT; large subunit ribosomal protein L20	ko03010	Ribosome
Bm000287	K02739	PSMB7; 20S proteasome subunit beta 2 [EC:3.4.25.1]	ko03050	Proteasome
Bm000304	K03013	RPABC1, RPB5, POLR2E; DNA-directed RNA polymerases I, II, and III subunit RPABC1	ko03020	RNA polymerase
Bm000305	K14564	NOP56; nucleolar protein 56	ko03008	Ribosome biogenesis in eukaryotes
Bm000312	K10246	ELO3; fatty acid elongase 3 [EC:2.3.1.199]	ko00062	Fatty acid elongation
Bm000326	K07513	ACAA1; acetyl-CoA acyltransferase 1 [EC:2.3.1.16]	ko04146	Peroxisome
Bm000334	K12812	DDX39B, UAP56, SUB2; ATP-dependent RNA helicase UAP56/SUB2 [EC:3.6.4.13]	ko03040	Spliceosome
Bm000335	K04368	MAP2K1, MEK1; mitogen-activated protein kinase kinase 1 [EC:2.7.12.2]	ko04626	Plant-pathogen interaction
Bm000339	K07904	RAB11A; Ras-related protein Rab-11A	ko04144	Endocytosis
Bm000341	K00963	UGP2, galU, galF; UTP--glucose-1-phosphate uridylyltransferase [EC:2.7.7.9]	ko00040	Pentose and glucuronate interconversions
Bm000342	K00059	fabG, OAR1; 3-oxoacyl-[acyl-carrier protein] reductase [EC:1.1.1.100]	ko00061	Fatty acid biosynthesis
Bm000344	K03253	EIF3B; translation initiation factor 3 subunit B	ko03013	Nucleocytoplasmic transport
Bm000345	K02692	psaD; photosystem I subunit II	ko00195	Photosynthesis
Bm000360	K14561	IMP4; U3 small nucleolar ribonucleoprotein protein IMP4	ko03008	Ribosome biogenesis in eukaryotes
Bm000361	K14561	IMP4; U3 small nucleolar ribonucleoprotein protein IMP4	ko03008	Ribosome biogenesis in eukaryotes
Bm000362	K13606	NOL, NYC1; chlorophyll(ide) b reductase [EC:1.1.1.294]	ko00860	Porphyrin metabolism
Bm000366	K14561	IMP4; U3 small nucleolar ribonucleoprotein protein IMP4	ko03008	Ribosome biogenesis in eukaryotes
Bm000369	K12881	THOC4, ALY; THO complex subunit 4	ko03040	Spliceosome
Bm000382	K08337	ATG7; ubiquitin-like modifier-activating enzyme ATG7	ko04140	Autophagy - animal
Bm000383	K08337	ATG7; ubiquitin-like modifier-activating enzyme ATG7	ko04140	Autophagy - animal
Bm000390	K02927	RP-L40e, RPL40, UBA52; ubiquitin-large subunit ribosomal protein L40e	ko03010	Ribosome
Bm000393	K01696	trpB; tryptophan synthase beta chain [EC:4.2.1.20]	ko00260	Glycine, serine and threonine metabolism
Bm000410	K07511	ECHS1; enoyl-CoA hydratase [EC:4.2.1.17]	ko00280	Valine, leucine and isoleucine degradation
Bm000427	K14567	UTP14; U3 small nucleolar RNA-associated protein 14	ko03008	Ribosome biogenesis in eukaryotes
Bm000428	K03715	MGD; 1,2-diacylglycerol 3-beta-galactosyltransferase [EC:2.4.1.46]	ko00561	Glycerolipid metabolism
Bm000438	K18466	VPS26A_B; vacuolar protein sorting-associated protein 26A/B	ko04144	Endocytosis
Bm000447	K02492	hemA; glutamyl-tRNA reductase [EC:1.2.1.70]	ko00860	Porphyrin metabolism
Bm000453	K00963	UGP2, galU, galF; UTP--glucose-1-phosphate uridylyltransferase [EC:2.7.7.9]	ko00040	Pentose and glucuronate interconversions
Bm000487	K14549	UTP15; U3 small nucleolar RNA-associated protein 15	ko03008	Ribosome biogenesis in eukaryotes
Bm000494	K02981	RP-S2e, RPS2; small subunit ribosomal protein S2e	ko03010	Ribosome
Bm000500	K14558	PWP2, UTP1; periodic tryptophan protein 2	ko03008	Ribosome biogenesis in eukaryotes
Bm000509	K03231	EEF1A; elongation factor 1-alpha	ko03013	Nucleocytoplasmic transport
Bm000516	K03231	EEF1A; elongation factor 1-alpha	ko03013	Nucleocytoplasmic transport
Bm000522	K12319	GUCY1B; guanylate cyclase soluble subunit beta [EC:4.6.1.2]	ko00230	Purine metabolism
Bm000524	K14558	PWP2, UTP1; periodic tryptophan protein 2	ko03008	Ribosome biogenesis in eukaryotes
Bm000526	K14190	VTC2_5; GDP-L-galactose phosphorylase [EC:2.7.7.69]	ko00053	Ascorbate and aldarate metabolism
Bm000537	K06943	NOG1; nucleolar GTP-binding protein	ko03008	Ribosome biogenesis in eukaryotes
Bm000539	K00876	udk, UCK; uridine kinase [EC:2.7.1.48]	ko00240	Pyrimidine metabolism
Bm000540	K00876	udk, UCK; uridine kinase [EC:2.7.1.48]	ko00240	Pyrimidine metabolism
Bm000541	K00876	udk, UCK; uridine kinase [EC:2.7.1.48]	ko00240	Pyrimidine metabolism
Bm000546	K01689	ENO, eno; enolase [EC:4.2.1.11]	ko03018	RNA degradation
Bm000554	K06699	PSME4; proteasome activator subunit 4	ko03050	Proteasome
Bm000556	K08081	TR1; tropinone reductase I [EC:1.1.1.206]	ko00960	Tropane, piperidine and pyridine alkaloid biosynthesis
Bm000580	K09561	STUB1, CHIP; STIP1 homology and U-box containing protein 1 [EC:2.3.2.27]	ko04120	Ubiquitin mediated proteolysis
Bm000586	K01915	glnA, GLUL; glutamine synthetase [EC:6.3.1.2]	ko00220	Arginine biosynthesis
Bm000589	K01638	aceB, glcB; malate synthase [EC:2.3.3.9]	ko00620	Pyruvate metabolism
Bm000597	K02903	RP-L28e, RPL28; large subunit ribosomal protein L28e	ko03010	Ribosome
Bm000604	K03283	HSPA1_6_8; heat shock 70kDa protein 1/6/8	ko04144	Endocytosis
Bm000605	K01074	PPT; palmitoyl-protein thioesterase [EC:3.1.2.22]	ko00062	Fatty acid elongation
Bm000616	K05349	bglX; beta-glucosidase [EC:3.2.1.21]	ko00940	Phenylpropanoid biosynthesis
Bm000618	K01194	TREH, treA, treF; alpha,alpha-trehalase [EC:3.2.1.28]	ko00500	Starch and sucrose metabolism
Bm000625	K02261	COX2; cytochrome c oxidase subunit 2	ko00190	Oxidative phosphorylation
Bm000630	K02261	COX2; cytochrome c oxidase subunit 2	ko00190	Oxidative phosphorylation
Bm000634	K01194	TREH, treA, treF; alpha,alpha-trehalase [EC:3.2.1.28]	ko00500	Starch and sucrose metabolism
Bm000640	K01557	FAHD1; acylpyruvate hydrolase [EC:3.7.1.5]	ko00350	Tyrosine metabolism
Bm000641	K00850	pfkA, PFK; 6-phosphofructokinase 1 [EC:2.7.1.11]	ko03018	RNA degradation
Bm000646	K00799	GST, gst; glutathione S-transferase [EC:2.5.1.18]	ko00480	Glutathione metabolism
Bm000654	K02905	RP-L29e, RPL29; large subunit ribosomal protein L29e	ko03010	Ribosome
Bm000659	K12599	SKI2, SKIV2L; antiviral helicase SKI2 [EC:3.6.4.13]	ko03018	RNA degradation
Bm000660	K13238	ECI1, DCI; Delta3-Delta2-enoyl-CoA isomerase [EC:5.3.3.8]	ko00071	Fatty acid degradation
Bm000664	K03253	EIF3B; translation initiation factor 3 subunit B	ko03013	Nucleocytoplasmic transport
Bm000670	K07513	ACAA1; acetyl-CoA acyltransferase 1 [EC:2.3.1.16]	ko04146	Peroxisome
Bm000674	K02900	RP-L27Ae, RPL27A; large subunit ribosomal protein L27Ae	ko03010	Ribosome
Bm000682	K02183	CALM; calmodulin	ko04070	Phosphatidylinositol signaling system
Bm000686	K10534	NR; nitrate reductase (NAD(P)H) [EC:1.7.1.1 1.7.1.2 1.7.1.3]	ko00910	Nitrogen metabolism
Bm000691	K10536	aguA; agmatine deiminase [EC:3.5.3.12]	ko00330	Arginine and proline metabolism
Bm000694	K17917	SNX1_2; sorting nexin-1/2	ko04144	Endocytosis
Bm000709	K01867	WARS, trpS; tryptophanyl-tRNA synthetase [EC:6.1.1.2]	ko00970	Aminoacyl-tRNA biosynthesis
Bm000714	K03253	EIF3B; translation initiation factor 3 subunit B	ko03013	Nucleocytoplasmic transport
Bm000715	K11204	GCLC; glutamate--cysteine ligase catalytic subunit [EC:6.3.2.2]	ko00480	Glutathione metabolism
Bm000720	K02917	RP-L35Ae, RPL35A; large subunit ribosomal protein L35Ae	ko03010	Ribosome
Bm000721	K14411	MSI; RNA-binding protein Musashi	ko03015	mRNA surveillance pathway
Bm000728	K10563	mutM, fpg; formamidopyrimidine-DNA glycosylase [EC:3.2.2.23 4.2.99.18]	ko03410	Base excision repair
Bm000734	K03965	NDUFB9; NADH dehydrogenase (ubiquinone) 1 beta subcomplex subunit 9	ko00190	Oxidative phosphorylation
Bm000736	K01803	TPI, tpiA; triosephosphate isomerase (TIM) [EC:5.3.1.1]	ko00010	Glycolysis / Gluconeogenesis
Bm000737	K01803	TPI, tpiA; triosephosphate isomerase (TIM) [EC:5.3.1.1]	ko00010	Glycolysis / Gluconeogenesis
Bm000738	K01495	GCH1, folE; GTP cyclohydrolase IA [EC:3.5.4.16]	ko00790	Folate biosynthesis
Bm000748	K13989	DERL2_3; Derlin-2/3	ko04141	Protein processing in endoplasmic reticulum
Bm000759	K02927	RP-L40e, RPL40, UBA52; ubiquitin-large subunit ribosomal protein L40e	ko03010	Ribosome
Bm000762	K05577	ndhF; NAD(P)H-quinone oxidoreductase subunit 5 [EC:7.1.1.2]	ko00190	Oxidative phosphorylation
Bm000773	K02920	RP-L36e, RPL36; large subunit ribosomal protein L36e	ko03010	Ribosome
Bm000775	K03097	CSNK2A; casein kinase II subunit alpha [EC:2.7.11.1]	ko03008	Ribosome biogenesis in eukaryotes
Bm000778	K01915	glnA, GLUL; glutamine synthetase [EC:6.3.1.2]	ko00220	Arginine biosynthesis
Bm000779	K12837	U2AF2; splicing factor U2AF 65 kDa subunit	ko03040	Spliceosome
Bm000783	K12837	U2AF2; splicing factor U2AF 65 kDa subunit	ko03040	Spliceosome
Bm000786	K03965	NDUFB9; NADH dehydrogenase (ubiquinone) 1 beta subcomplex subunit 9	ko00190	Oxidative phosphorylation
Bm000805	K00232	E1.3.3.6, ACOX1, ACOX3; acyl-CoA oxidase [EC:1.3.3.6]	ko04146	Peroxisome
Bm000812	K01823	idi, IDI; isopentenyl-diphosphate Delta-isomerase [EC:5.3.3.2]	ko00900	Terpenoid backbone biosynthesis
Bm000813	K08913	LHCB2; light-harvesting complex II chlorophyll a/b binding protein 2	ko00196	Photosynthesis - antenna proteins
Bm000841	K02739	PSMB7; 20S proteasome subunit beta 2 [EC:3.4.25.1]	ko03050	Proteasome
Bm000848	K05293	PIGU; GPI-anchor transamidase subunit U	ko00563	Glycosylphosphatidylinositol
Bm000853	K12319	GUCY1B; guanylate cyclase soluble subunit beta [EC:4.6.1.2]	ko00230	Purine metabolism
Bm000857	K02132	ATPeF1A, ATP5A1, ATP1; F-type H+-transporting ATPase subunit alpha	ko00190	Oxidative phosphorylation
Bm000860	K00854	xylB, XYLB; xylulokinase [EC:2.7.1.17]	ko00040	Pentose and glucuronate interconversions
Bm000863	K01647	CS, gltA; citrate synthase [EC:2.3.3.1]	ko00020	Citrate cycle
Bm000867	K02210	MCM7, CDC47; DNA replication licensing factor MCM7 [EC:5.6.2.3]	ko03030	DNA replication
Bm000873	K02261	COX2; cytochrome c oxidase subunit 2	ko00190	Oxidative phosphorylation
Bm000874	K13412	CPK; calcium-dependent protein kinase [EC:2.7.11.1]	ko04626	Plant-pathogen interaction
Bm000875	K00001	E1.1.1.1, adh; alcohol dehydrogenase [EC:1.1.1.1]	ko00350	Tyrosine metabolism
Bm000876	K00001	E1.1.1.1, adh; alcohol dehydrogenase [EC:1.1.1.1]	ko00350	Tyrosine metabolism
Bm000879	K13412	CPK; calcium-dependent protein kinase [EC:2.7.11.1]	ko04626	Plant-pathogen interaction
Bm000885	K01922	PPCS, COAB; phosphopantothenate---cysteine ligase (ATP) [EC:6.3.2.51]	ko00770	Pantothenate and CoA biosynthesis
Bm000889	K02183	CALM; calmodulin	ko04070	Phosphatidylinositol signaling system
Bm000910	K09503	DNAJA2; DnaJ homolog subfamily A member 2	ko04141	Protein processing in endoplasmic reticulum
Bm000913	K09503	DNAJA2; DnaJ homolog subfamily A member 2	ko04141	Protein processing in endoplasmic reticulum
Bm000914	K08054	CANX; calnexin	ko04145	Phagosome
Bm000926	K16055	TPS; trehalose 6-phosphate synthase/phosphatase [EC:2.4.1.15 3.1.3.12]	ko00500	Starch and sucrose metabolism
Bm000932	K01874	MARS, metG; methionyl-tRNA synthetase [EC:6.1.1.10]	ko00970	Aminoacyl-tRNA biosynthesis
Bm000936	K02964	RP-S18e, RPS18; small subunit ribosomal protein S18e	ko03010	Ribosome
Bm000951	K01535	PMA1, PMA2; H+-transporting ATPase [EC:7.1.2.1]	ko00190	Oxidative phosphorylation
Bm000952	K09580	PDIA1, P4HB; protein disulfide-isomerase A1 [EC:5.3.4.1]	ko04141	Protein processing in endoplasmic reticulum
Bm000955	K00721	DPM1; dolichol-phosphate mannosyltransferase [EC:2.4.1.83]	ko00510	N-Glycan biosynthesis
Bm000956	K01689	ENO, eno; enolase [EC:4.2.1.11]	ko03018	RNA degradation
Bm000961	K00559	SMT1, ERG6; sterol 24-C-methyltransferase [EC:2.1.1.41]	ko00100	Steroid biosynthesis
Bm000965	K00122	FDH; formate dehydrogenase [EC:1.17.1.9]	ko00630	Glyoxylate and dicarboxylate metabolism
Bm000967	K02324	POLE; DNA polymerase epsilon subunit 1 [EC:2.7.7.7]	ko03030	DNA replication
Bm000978	K04565	SOD1; superoxide dismutase, Cu-Zn family [EC:1.15.1.1]	ko04146	Peroxisome
Bm000979	K04565	SOD1; superoxide dismutase, Cu-Zn family [EC:1.15.1.1]	ko04146	Peroxisome
Bm000989	K04565	SOD1; superoxide dismutase, Cu-Zn family [EC:1.15.1.1]	ko04146	Peroxisome
Bm000993	K00799	GST, gst; glutathione S-transferase [EC:2.5.1.18]	ko00480	Glutathione metabolism
Bm000994	K01455	E3.5.1.49; formamidase [EC:3.5.1.49]	ko00630	Glyoxylate and dicarboxylate metabolism
Bm000995	K01648	ACLY; ATP citrate (pro-S)-lyase [EC:2.3.3.8]	ko00020	Citrate cycle
Bm001004	K02730	PSMA6; 20S proteasome subunit alpha 1 [EC:3.4.25.1]	ko03050	Proteasome
Bm001012	K11996	MOCS3, UBA4; adenylyltransferase and sulfurtransferase [EC:2.7.7.80 2.8.1.11]	ko04122	Sulfur relay system
Bm001021	K00162	PDHB, pdhB; pyruvate dehydrogenase E1 component subunit beta [EC:1.2.4.1]	ko00010	Glycolysis / Gluconeogenesis
Bm001024	K11996	MOCS3, UBA4; adenylyltransferase and sulfurtransferase [EC:2.7.7.80 2.8.1.11]	ko04122	Sulfur relay system
Bm001045	K01193	INV, sacA; beta-fructofuranosidase [EC:3.2.1.26]	ko00052	Galactose metabolism
Bm001046	K01193	INV, sacA; beta-fructofuranosidase [EC:3.2.1.26]	ko00052	Galactose metabolism
Bm001048	K03107	SRP68; signal recognition particle subunit SRP68	ko03060	Protein export
Bm001051	K09503	DNAJA2; DnaJ homolog subfamily A member 2	ko04141	Protein processing in endoplasmic reticulum
Bm001058	K05894	OPR; 12-oxophytodienoic acid reductase [EC:1.3.1.42]	ko00592	alpha-Linolenic acid metabolism
Bm001061	K19269	PGP, PGLP; phosphoglycolate phosphatase [EC:3.1.3.18 3.1.3.48]	ko00630	Glyoxylate and dicarboxylate metabolism
Bm001075	K10536	aguA; agmatine deiminase [EC:3.5.3.12]	ko00330	Arginine and proline metabolism
Bm001089	K03506	POLE4; DNA polymerase epsilon subunit 4 [EC:2.7.7.7]	ko03030	DNA replication
Bm001094	K04712	DEGS; sphingolipid 4-desaturase/C4-monooxygenase [EC:1.14.19.17 1.14.18.5]	ko00600	Sphingolipid metabolism
Bm001095	K02957	RP-S15Ae, RPS15A; small subunit ribosomal protein S15Ae	ko03010	Ribosome
Bm001108	K13126	PABPC; polyadenylate-binding protein	ko03018	RNA degradation
Bm001113	K00033	PGD, gnd, gntZ; 6-phosphogluconate dehydrogenase [EC:1.1.1.44 1.1.1.343]	ko00030	Pentose phosphate pathway
Bm001118	K00965	galT, GALT; UDPglucose--hexose-1-phosphate uridylyltransferase [EC:2.7.7.12]	ko00052	Galactose metabolism
Bm001128	K12197	CHMP1, VPS46, DID2; charged multivesicular body protein 1	ko04144	Endocytosis
Bm001131	K12859	TXNL4A, DIB1; U5 snRNP protein, DIM1 family	ko03040	Spliceosome
Bm001140	K02692	psaD; photosystem I subunit II	ko00195	Photosynthesis
Bm001145	K02865	RP-L10Ae, RPL10A; large subunit ribosomal protein L10Ae	ko03010	Ribosome
Bm001146	K02865	RP-L10Ae, RPL10A; large subunit ribosomal protein L10Ae	ko03010	Ribosome
Bm001150	K09503	DNAJA2; DnaJ homolog subfamily A member 2	ko04141	Protein processing in endoplasmic reticulum
Bm001151	K04799	FEN1, RAD2; flap endonuclease-1 [EC:3.1.-.-]	ko03030	DNA replication
Bm001159	K09503	DNAJA2; DnaJ homolog subfamily A member 2	ko04141	Protein processing in endoplasmic reticulum
Bm001191	K04564	SOD2; superoxide dismutase, Fe-Mn family [EC:1.15.1.1]	ko04146	Peroxisome
Bm001192	K03644	lipA, LIAS, LIP1, LIP5; lipoyl synthase [EC:2.8.1.8]	ko00785	Lipoic acid metabolism
Bm001204	K15422	SAL; 3'(2'), 5'-bisphosphate nucleotidase / inositol polyphosphate 1-phosphatase [EC:3.1.3.7 3.1.3.57]	ko04070	Phosphatidylinositol signaling system
Bm001214	K14404	CPSF4, YTH1; cleavage and polyadenylation specificity factor subunit 4	ko03015	mRNA surveillance pathway
Bm001229	K02886	RP-L2, MRPL2, rplB; large subunit ribosomal protein L2	ko03010	Ribosome
Bm001231	K14407	CSTF2, RNA15; cleavage stimulation factor subunit 2	ko03015	mRNA surveillance pathway
Bm001233	K03952	NDUFA8; NADH dehydrogenase (ubiquinone) 1 alpha subcomplex subunit 8	ko00190	Oxidative phosphorylation
Bm001236	K10747	LIG1; DNA ligase 1 [EC:6.5.1.1 6.5.1.6 6.5.1.7]	ko03030	DNA replication
Bm001260	K14290	XPO1, CRM1; exportin-1	ko03008	Ribosome biogenesis in eukaryotes
Bm001264	K05658	ABCB1, CD243; ATP-binding cassette, subfamily B (MDR/TAP), member 1 [EC:7.6.2.2]	ko02010	ABC transporters
Bm001267	K12619	XRN2, RAT1; 5'-3' exoribonuclease 2 [EC:3.1.13.-]	ko03018	RNA degradation
Bm001271	K14327	UPF2, RENT2; regulator of nonsense transcripts 2	ko03013	Nucleocytoplasmic transport
Bm001272	K11262	ACACA; acetyl-CoA carboxylase / biotin carboxylase 1 [EC:6.4.1.2 6.3.4.14 2.1.3.15]	ko00261	Monobactam biosynthesis
Bm001279	K11262	ACACA; acetyl-CoA carboxylase / biotin carboxylase 1 [EC:6.4.1.2 6.3.4.14 2.1.3.15]	ko00261	Monobactam biosynthesis
Bm001281	K08269	ULK2, ATG1; serine/threonine-protein kinase ULK2 [EC:2.7.11.1]	ko04140	Autophagy - animal
Bm001305	K07198	PRKAA, AMPK; 5'-AMP-activated protein kinase, catalytic alpha subunit [EC:2.7.11.31]	ko04140	Autophagy - animal
Bm001322	K02890	RP-L22, MRPL22, rplV; large subunit ribosomal protein L22	ko03010	Ribosome
Bm001326	K02985	RP-S3e, RPS3; small subunit ribosomal protein S3e	ko03010	Ribosome
Bm001330	K02133	ATPeF1B, ATP5B, ATP2; F-type H+-transporting ATPase subunit beta [EC:7.1.2.2]	ko00190	Oxidative phosphorylation
Bm001341	K00382	DLD, lpd, pdhD; dihydrolipoyl dehydrogenase [EC:1.8.1.4]	ko00260	Glycine, serine and threonine metabolism
Bm001353	K01870	IARS, ileS; isoleucyl-tRNA synthetase [EC:6.1.1.5]	ko00970	Aminoacyl-tRNA biosynthesis
Bm001354	K01373	CTSF; cathepsin F [EC:3.4.22.41]	ko04626	Plant-pathogen interaction
Bm001355	K13431	SRPR; signal recognition particle receptor subunit alpha	ko03060	Protein export
Bm001360	K13431	SRPR; signal recognition particle receptor subunit alpha	ko03060	Protein export
Bm001378	K13447	RBOH; respiratory burst oxidase [EC:1.6.3.- 1.11.1.-]	ko04626	Plant-pathogen interaction
Bm001403	K07937	ARF1_2; ADP-ribosylation factor 1/2	ko04144	Endocytosis
Bm001404	K02934	RP-L6e, RPL6; large subunit ribosomal protein L6e	ko03010	Ribosome
Bm001409	K10666	RNF5; E3 ubiquitin-protein ligase RNF5 [EC:2.3.2.27]	ko04141	Protein processing in endoplasmic reticulum
Bm001412	K10666	RNF5; E3 ubiquitin-protein ligase RNF5 [EC:2.3.2.27]	ko04141	Protein processing in endoplasmic reticulum
Bm001415	K12856	PRPF8, PRP8; pre-mRNA-processing factor 8	ko03040	Spliceosome
Bm001417	K00128	ALDH; aldehyde dehydrogenase (NAD+) [EC:1.2.1.3]	ko00280	Valine, leucine and isoleucine degradation
Bm001419	K02910	RP-L31e, RPL31; large subunit ribosomal protein L31e	ko03010	Ribosome
Bm001457	K07901	RAB8A, MEL; Ras-related protein Rab-8A	ko04144	Endocytosis
Bm001460	K10597	UBE4B, UFD2; ubiquitin conjugation factor E4 B [EC:2.3.2.27]	ko04120	Ubiquitin mediated proteolysis
Bm001462	K09523	DNAJC3; DnaJ homolog subfamily C member 3	ko04141	Protein processing in endoplasmic reticulum
Bm001463	K14556	DIP2, UTP12, WDR3; U3 small nucleolar RNA-associated protein 12	ko03008	Ribosome biogenesis in eukaryotes
Bm001465	K14066	GPS; geranyl diphosphate synthase [EC:2.5.1.1]	ko00900	Terpenoid backbone biosynthesis
Bm001471	K13249	SSR1; translocon-associated protein subunit alpha	ko04141	Protein processing in endoplasmic reticulum
Bm001476	K12194	CHMP4A_B, SNF7, VPS32A_B; charged multivesicular body protein 4A/B	ko04144	Endocytosis
Bm001488	K01955	carB, CPA2; carbamoyl-phosphate synthase large subunit [EC:6.3.5.5]	ko00250	Alanine, aspartate and glutamate metabolism
Bm001503	K13459	RPS2; disease resistance protein RPS2	ko04626	Plant-pathogen interaction
Bm001508	K02896	RP-L24e, RPL24; large subunit ribosomal protein L24e	ko03010	Ribosome
Bm001523	K01889	FARSA, pheS; phenylalanyl-tRNA synthetase alpha chain [EC:6.1.1.20]	ko00970	Aminoacyl-tRNA biosynthesis
Bm001526	K02891	RP-L22e, RPL22; large subunit ribosomal protein L22e	ko03010	Ribosome
Bm001537	K09490	HSPA5, BIP; endoplasmic reticulum chaperone BiP [EC:3.6.4.10]	ko03060	Protein export
Bm001540	K09490	HSPA5, BIP; endoplasmic reticulum chaperone BiP [EC:3.6.4.10]	ko03060	Protein export
Bm001547	K00626	ACAT, atoB; acetyl-CoA C-acetyltransferase [EC:2.3.1.9]	ko00280	Valine, leucine and isoleucine degradation
Bm001548	K09291	TPR, MLP1, MLP2; nucleoprotein TPR	ko03013	Nucleocytoplasmic transport
Bm001550	K03144	TFIIH4, GTF2H4, TFB2; transcription initiation factor TFIIH subunit 4	ko03420	Nucleotide excision repair
Bm001555	K01519	rdgB, ITPA; XTP/dITP diphosphohydrolase [EC:3.6.1.66]	ko00230	Purine metabolism
Bm001564	K06689	UBE2D, UBC4, UBC5; ubiquitin-conjugating enzyme E2 D [EC:2.3.2.23]	ko04120	Ubiquitin mediated proteolysis
Bm001573	K00253	IVD, ivd; isovaleryl-CoA dehydrogenase [EC:1.3.8.4]	ko00280	Valine, leucine and isoleucine degradation
Bm001576	K02868	RP-L11e, RPL11; large subunit ribosomal protein L11e	ko03010	Ribosome
Bm001597	K11131	DKC1, NOLA4, CBF5; H/ACA ribonucleoprotein complex subunit 4 [EC:5.4.99.-]	ko03008	Ribosome biogenesis in eukaryotes
Bm001599	K19269	PGP, PGLP; phosphoglycolate phosphatase [EC:3.1.3.18 3.1.3.48]	ko00630	Glyoxylate and dicarboxylate metabolism
Bm001602	K02920	RP-L36e, RPL36; large subunit ribosomal protein L36e	ko03010	Ribosome
Bm001606	K11517	HAO; (S)-2-hydroxy-acid oxidase [EC:1.1.3.15]	ko04146	Peroxisome
Bm001608	K01194	TREH, treA, treF; alpha,alpha-trehalase [EC:3.2.1.28]	ko00500	Starch and sucrose metabolism
Bm001609	K10950	ERO1L; ERO1-like protein alpha [EC:1.8.4.-]	ko04141	Protein processing in endoplasmic reticulum
Bm001610	K12126	PIF3; phytochrome-interacting factor 3	ko04075	Plant hormone signal transduction
Bm001615	K03124	TFIIB, GTF2B, SUA7, tfb; transcription initiation factor TFIIB	ko03022	Basal transcription factors
Bm001617	K18532	AK6, FAP7; adenylate kinase [EC:2.7.4.3]	ko03008	Ribosome biogenesis in eukaryotes
Bm001618	K08334	BECN, VPS30, ATG6; beclin	ko04140	Autophagy - animal
Bm001627	K01426	E3.5.1.4, amiE; amidase [EC:3.5.1.4]	ko00330	Arginine and proline metabolism
Bm001636	K00799	GST, gst; glutathione S-transferase [EC:2.5.1.18]	ko00480	Glutathione metabolism
Bm001639	K00626	ACAT, atoB; acetyl-CoA C-acetyltransferase [EC:2.3.1.9]	ko00280	Valine, leucine and isoleucine degradation
Bm001658	K00927	PGK, pgk; phosphoglycerate kinase [EC:2.7.2.3]	ko00010	Glycolysis / Gluconeogenesis
Bm001666	K00432	gpx, btuE, bsaA; glutathione peroxidase [EC:1.11.1.9]	ko00590	Arachidonic acid metabolism
Bm001670	K01725	cynS; cyanate lyase [EC:4.2.1.104]	ko00910	Nitrogen metabolism
Bm001673	K04079	HSP90A, htpG; molecular chaperone HtpG	ko04141	Protein processing in endoplasmic reticulum
Bm001690	K14509	ETR, ERS; ethylene receptor [EC:2.7.13.-]	ko04075	Plant hormone signal transduction
Bm001692	K14488	SAUR; SAUR family protein	ko04075	Plant hormone signal transduction
Bm001694	K02920	RP-L36e, RPL36; large subunit ribosomal protein L36e	ko03010	Ribosome
Bm001719	K10884	XRCC6, KU70, G22P1; ATP-dependent DNA helicase 2 subunit 1	ko03450	Non-homologous end-joining
Bm001726	K00820	glmS, GFPT; glutamine---fructose-6-phosphate transaminase (isomerizing) [EC:2.6.1.16]	ko00250	Alanine, aspartate and glutamate metabolism
Bm001733	K00801	FDFT1; farnesyl-diphosphate farnesyltransferase [EC:2.5.1.21]	ko00100	Steroid biosynthesis
Bm001740	K00134	GAPDH, gapA; glyceraldehyde 3-phosphate dehydrogenase (phosphorylating) [EC:1.2.1.12]	ko00010	Glycolysis / Gluconeogenesis
Bm001742	K01611	speD, AMD1; S-adenosylmethionine decarboxylase [EC:4.1.1.50]	ko00270	Cysteine and methionine metabolism
Bm001764	K00161	PDHA, pdhA; pyruvate dehydrogenase E1 component subunit alpha [EC:1.2.4.1]	ko00010	Glycolysis / Gluconeogenesis
Bm001768	K03124	TFIIB, GTF2B, SUA7, tfb; transcription initiation factor TFIIB	ko03022	Basal transcription factors
Bm001769	K03124	TFIIB, GTF2B, SUA7, tfb; transcription initiation factor TFIIB	ko03022	Basal transcription factors
Bm001771	K03124	TFIIB, GTF2B, SUA7, tfb; transcription initiation factor TFIIB	ko03022	Basal transcription factors
Bm001782	K00627	DLAT, aceF, pdhC; pyruvate dehydrogenase E2 component (dihydrolipoyllysine-residue acetyltransferase) [EC:2.3.1.12]	ko00010	Glycolysis / Gluconeogenesis
Bm001783	K00627	DLAT, aceF, pdhC; pyruvate dehydrogenase E2 component (dihydrolipoyllysine-residue acetyltransferase) [EC:2.3.1.12]	ko00010	Glycolysis / Gluconeogenesis
Bm001787	K00939	adk, AK; adenylate kinase [EC:2.7.4.3]	ko00230	Purine metabolism
Bm001792	K00627	DLAT, aceF, pdhC; pyruvate dehydrogenase E2 component (dihydrolipoyllysine-residue acetyltransferase) [EC:2.3.1.12]	ko00010	Glycolysis / Gluconeogenesis
Bm001799	K01807	rpiA; ribose 5-phosphate isomerase A [EC:5.3.1.6]	ko00030	Pentose phosphate pathway
Bm001801	K14320	AAAS; aladin	ko03013	Nucleocytoplasmic transport
Bm001802	K13648	GAUT; alpha-1,4-galacturonosyltransferase [EC:2.4.1.43]	ko00500	Starch and sucrose metabolism
Bm001805	K06063	SNW1, SKIIP, SKIP; SNW domain-containing protein 1	ko03040	Spliceosome
Bm001813	K18443	GBF1; golgi-specific brefeldin A-resistance guanine nucleotide exchange factor 1	ko04144	Endocytosis
Bm001814	K18443	GBF1; golgi-specific brefeldin A-resistance guanine nucleotide exchange factor 1	ko04144	Endocytosis
Bm001817	K14007	SEC24; protein transport protein SEC24	ko04141	Protein processing in endoplasmic reticulum
Bm001822	K02985	RP-S3e, RPS3; small subunit ribosomal protein S3e	ko03010	Ribosome
Bm001825	K02883	RP-L18e, RPL18; large subunit ribosomal protein L18e	ko03010	Ribosome
Bm001827	K02730	PSMA6; 20S proteasome subunit alpha 1 [EC:3.4.25.1]	ko03050	Proteasome
Bm001828	K08506	SYP7; syntaxin of plants SYP7	ko04130	SNARE interactions in vesicular transport
Bm001829	K02905	RP-L29e, RPL29; large subunit ribosomal protein L29e	ko03010	Ribosome
Bm001841	K00963	UGP2, galU, galF; UTP--glucose-1-phosphate uridylyltransferase [EC:2.7.7.9]	ko00040	Pentose and glucuronate interconversions
Bm001843	K07179	RIOK2; RIO kinase 2 [EC:2.7.11.1]	ko03008	Ribosome biogenesis in eukaryotes
Bm001862	K02898	RP-L26e, RPL26; large subunit ribosomal protein L26e	ko03010	Ribosome
Bm001867	K00975	glgC; glucose-1-phosphate adenylyltransferase [EC:2.7.7.27]	ko00500	Starch and sucrose metabolism
Bm001872	K03134	TAF10; transcription initiation factor TFIID subunit 10	ko03022	Basal transcription factors
Bm001879	K00927	PGK, pgk; phosphoglycerate kinase [EC:2.7.2.3]	ko00010	Glycolysis / Gluconeogenesis
Bm001880	K00927	PGK, pgk; phosphoglycerate kinase [EC:2.7.2.3]	ko00010	Glycolysis / Gluconeogenesis
Bm001881	K12872	RBM22, SLT11; pre-mRNA-splicing factor RBM22/SLT11	ko03040	Spliceosome
Bm001888	K12591	RRP6, EXOSC10; exosome complex exonuclease RRP6 [EC:3.1.13.-]	ko03018	RNA degradation
Bm001920	K09837	LUT1, CYP97C1; carotenoid epsilon hydroxylase [EC:1.14.14.158]	ko00906	Carotenoid biosynthesis
Bm001933	K03921	FAB2, SSI2, desA1; acyl-[acyl-carrier-protein] desaturase [EC:1.14.19.2 1.14.19.11 1.14.19.26]	ko00061	Fatty acid biosynthesis
Bm001934	K03921	FAB2, SSI2, desA1; acyl-[acyl-carrier-protein] desaturase [EC:1.14.19.2 1.14.19.11 1.14.19.26]	ko00061	Fatty acid biosynthesis
Bm001953	K09422	MYBP; transcription factor MYB, plant	ko04626	Plant-pathogen interaction
Bm001964	K01595	ppc; phosphoenolpyruvate carboxylase [EC:4.1.1.31]	ko00620	Pyruvate metabolism
Bm001966	K14423	SMO1; plant 4,4-dimethylsterol C-4alpha-methyl-monooxygenase [EC:1.14.18.10]	ko00100	Steroid biosynthesis
Bm001974	K01858	INO1, ISYNA1; myo-inositol-1-phosphate synthase [EC:5.5.1.4]	ko00562	Inositol phosphate metabolism
Bm001977	K02943	RP-LP2, RPLP2; large subunit ribosomal protein LP2	ko03010	Ribosome
Bm001989	K02866	RP-L10e, RPL10; large subunit ribosomal protein L10e	ko03010	Ribosome
Bm001995	K09422	MYBP; transcription factor MYB, plant	ko04626	Plant-pathogen interaction
Bm002006	K01945	purD; phosphoribosylamine---glycine ligase [EC:6.3.4.13]	ko00230	Purine metabolism
Bm002009	K00297	metF, MTHFR; methylenetetrahydrofolate reductase (NADH) [EC:1.5.1.54]	ko00670	One carbon pool by folate
Bm002011	K09422	MYBP; transcription factor MYB, plant	ko04626	Plant-pathogen interaction
Bm002029	K12160	SUMO, SMT3; small ubiquitin-related modifier	ko03013	Nucleocytoplasmic transport
Bm002030	K01426	E3.5.1.4, amiE; amidase [EC:3.5.1.4]	ko00330	Arginine and proline metabolism
Bm002039	K14558	PWP2, UTP1; periodic tryptophan protein 2	ko03008	Ribosome biogenesis in eukaryotes
Bm002052	K03249	EIF3F; translation initiation factor 3 subunit F	ko03013	Nucleocytoplasmic transport
Bm002057	K04712	DEGS; sphingolipid 4-desaturase/C4-monooxygenase [EC:1.14.19.17 1.14.18.5]	ko00600	Sphingolipid metabolism
Bm002066	K11824	AP2A; AP-2 complex subunit alpha	ko04144	Endocytosis
Bm002076	K00797	speE, SRM, SPE3; spermidine synthase [EC:2.5.1.16]	ko00270	Cysteine and methionine metabolism
Bm002077	K14561	IMP4; U3 small nucleolar ribonucleoprotein protein IMP4	ko03008	Ribosome biogenesis in eukaryotes
Bm002078	K01702	LEU1; 3-isopropylmalate dehydratase [EC:4.2.1.33]	ko00290	Valine, leucine and isoleucine biosynthesis
Bm002081	K02932	RP-L5e, RPL5; large subunit ribosomal protein L5e	ko03010	Ribosome
Bm002084	K02981	RP-S2e, RPS2; small subunit ribosomal protein S2e	ko03010	Ribosome
Bm002117	K01103	PFKFB3; 6-phosphofructo-2-kinase / fructose-2,6-biphosphatase 3 [EC:2.7.1.105 3.1.3.46]	ko00051	Fructose and mannose metabolism
Bm002119	K03240	EIF2B5; translation initiation factor eIF-2B subunit epsilon	ko03013	Nucleocytoplasmic transport
Bm002126	K05643	ABCA3; ATP-binding cassette, subfamily A (ABC1), member 3	ko02010	ABC transporters
Bm002127	K01853	CAS1; cycloartenol synthase [EC:5.4.99.8]	ko00100	Steroid biosynthesis
Bm002143	K08341	GABARAP, ATG8, LC3; GABA(A) receptor-associated protein	ko04140	Autophagy - animal
Bm002167	K03841	FBP, fbp; fructose-1,6-bisphosphatase I [EC:3.1.3.11]	ko00010	Glycolysis / Gluconeogenesis
Bm002172	K01728	pel; pectate lyase [EC:4.2.2.2]	ko00040	Pentose and glucuronate interconversions
Bm002199	K10643	CNOT4, NOT4, MOT2; CCR4-NOT transcription complex subunit 4 [EC:2.3.2.27]	ko03018	RNA degradation
Bm002201	K07198	PRKAA, AMPK; 5'-AMP-activated protein kinase, catalytic alpha subunit [EC:2.7.11.31]	ko04140	Autophagy - animal
Bm002203	K07198	PRKAA, AMPK; 5'-AMP-activated protein kinase, catalytic alpha subunit [EC:2.7.11.31]	ko04140	Autophagy - animal
Bm002217	K04371	ERK, MAPK1_3; mitogen-activated protein kinase 1/3 [EC:2.7.11.24]	ko04626	Plant-pathogen interaction
Bm002220	K10956	SEC61A; protein transport protein SEC61 subunit alpha	ko04145	Phagosome
Bm002223	K06689	UBE2D, UBC4, UBC5; ubiquitin-conjugating enzyme E2 D [EC:2.3.2.23]	ko04120	Ubiquitin mediated proteolysis
Bm002227	K00799	GST, gst; glutathione S-transferase [EC:2.5.1.18]	ko00480	Glutathione metabolism
Bm002234	K02938	RP-L8e, RPL8; large subunit ribosomal protein L8e	ko03010	Ribosome
Bm002244	K13508	GPAT; glycerol-3-phosphate acyltransferase [EC:2.3.1.15 2.3.1.198]	ko00561	Glycerolipid metabolism
Bm002260	K02145	ATPeV1A, ATP6A; V-type H+-transporting ATPase subunit A [EC:7.1.2.2]	ko04145	Phagosome
Bm002272	K03039	PSMD13, RPN9; 26S proteasome regulatory subunit N9	ko03050	Proteasome
Bm002276	K00284	GLU, gltS; glutamate synthase (ferredoxin) [EC:1.4.7.1]	ko00630	Glyoxylate and dicarboxylate metabolism
Bm002291	K00737	MGAT3; beta-1,4-mannosyl-glycoprotein beta-1,4-N-acetylglucosaminyltransferase [EC:2.4.1.144]	ko04075	Plant hormone signal transduction
Bm002298	K03253	EIF3B; translation initiation factor 3 subunit B	ko03013	Nucleocytoplasmic transport
Bm002299	K03253	EIF3B; translation initiation factor 3 subunit B	ko03013	Nucleocytoplasmic transport
Bm002324	K02957	RP-S15Ae, RPS15A; small subunit ribosomal protein S15Ae	ko03010	Ribosome
Bm002326	K02957	RP-S15Ae, RPS15A; small subunit ribosomal protein S15Ae	ko03010	Ribosome
Bm002327	K02957	RP-S15Ae, RPS15A; small subunit ribosomal protein S15Ae	ko03010	Ribosome
Bm002342	K01176	AMY, amyA, malS; alpha-amylase [EC:3.2.1.1]	ko00500	Starch and sucrose metabolism
Bm002345	K01176	AMY, amyA, malS; alpha-amylase [EC:3.2.1.1]	ko00500	Starch and sucrose metabolism
Bm002353	K00279	CKX; cytokinin dehydrogenase [EC:1.5.99.12]	ko00908	Zeatin biosynthesis
Bm002370	K13719	OTU1, YOD1; ubiquitin thioesterase OTU1 [EC:3.1.2.-]	ko04141	Protein processing in endoplasmic reticulum
Bm002371	K15639	CYP734A1, BAS1; PHYB activation tagged suppressor 1 [EC:1.14.-.-]	ko00905	Brassinosteroid biosynthesis
Bm002383	K02934	RP-L6e, RPL6; large subunit ribosomal protein L6e	ko03010	Ribosome
Bm002385	K10575	UBE2G1, UBC7; ubiquitin-conjugating enzyme E2 G1 [EC:2.3.2.23]	ko04120	Ubiquitin mediated proteolysis
Bm002395	K02146	ATPeV0D, ATP6D; V-type H+-transporting ATPase subunit d	ko04145	Phagosome
Bm002396	K00626	ACAT, atoB; acetyl-CoA C-acetyltransferase [EC:2.3.1.9]	ko00280	Valine, leucine and isoleucine degradation
Bm002397	K05758	ARPC2; actin related protein 2/3 complex, subunit 2	ko04144	Endocytosis
Bm002399	K02146	ATPeV0D, ATP6D; V-type H+-transporting ATPase subunit d	ko04145	Phagosome
Bm002404	K02896	RP-L24e, RPL24; large subunit ribosomal protein L24e	ko03010	Ribosome
Bm002407	K02146	ATPeV0D, ATP6D; V-type H+-transporting ATPase subunit d	ko04145	Phagosome
Bm002412	K08057	CALR; calreticulin	ko04145	Phagosome
Bm002415	K00688	PYG, glgP; glycogen phosphorylase [EC:2.4.1.1]	ko00500	Starch and sucrose metabolism
Bm002424	K07513	ACAA1; acetyl-CoA acyltransferase 1 [EC:2.3.1.16]	ko04146	Peroxisome
Bm002430	K13344	PEX13; peroxin-13	ko04146	Peroxisome
Bm002432	K13457	RPM1, RPS3; disease resistance protein RPM1	ko04626	Plant-pathogen interaction
Bm002433	K00231	PPOX, hemY; protoporphyrinogen/coproporphyrinogen III oxidase [EC:1.3.3.4 1.3.3.15]	ko00860	Porphyrin metabolism
Bm002434	K02893	RP-L23Ae, RPL23A; large subunit ribosomal protein L23Ae	ko03010	Ribosome
Bm002437	K12614	DDX6, RCK, DHH1; ATP-dependent RNA helicase DDX6/DHH1 [EC:3.6.4.13]	ko03018	RNA degradation
Bm002449	K00430	E1.11.1.7; peroxidase [EC:1.11.1.7]	ko00940	Phenylpropanoid biosynthesis
Bm002451	K00083	CAD; cinnamyl-alcohol dehydrogenase [EC:1.1.1.195]	ko00940	Phenylpropanoid biosynthesis
Bm002453	K00818	E2.6.1.11, argD; acetylornithine aminotransferase [EC:2.6.1.11]	ko00220	Arginine biosynthesis
Bm002478	K00963	UGP2, galU, galF; UTP--glucose-1-phosphate uridylyltransferase [EC:2.7.7.9]	ko00040	Pentose and glucuronate interconversions
Bm002479	K00566	mnmA, trmU; tRNA-uridine 2-sulfurtransferase [EC:2.8.1.13]	ko04122	Sulfur relay system
Bm002480	K00566	mnmA, trmU; tRNA-uridine 2-sulfurtransferase [EC:2.8.1.13]	ko04122	Sulfur relay system
Bm002483	K00058	serA, PHGDH; D-3-phosphoglycerate dehydrogenase / 2-oxoglutarate reductase [EC:1.1.1.95 1.1.1.399]	ko00260	Glycine, serine and threonine metabolism
Bm002484	K03238	EIF2S2; translation initiation factor 2 subunit 2	ko03013	Nucleocytoplasmic transport
Bm002493	K00549	metE; 5-methyltetrahydropteroyltriglutamate--homocysteine methyltransferase [EC:2.1.1.14]	ko00270	Cysteine and methionine metabolism
Bm002514	K13412	CPK; calcium-dependent protein kinase [EC:2.7.11.1]	ko04626	Plant-pathogen interaction
Bm002515	K13412	CPK; calcium-dependent protein kinase [EC:2.7.11.1]	ko04626	Plant-pathogen interaction
Bm002524	K11099	SNRPG, SMG; small nuclear ribonucleoprotein G	ko03040	Spliceosome
Bm002525	K03943	NDUFV2; NADH dehydrogenase (ubiquinone) flavoprotein 2 [EC:7.1.1.2]	ko00190	Oxidative phosphorylation
Bm002526	K00430	E1.11.1.7; peroxidase [EC:1.11.1.7]	ko00940	Phenylpropanoid biosynthesis
Bm002531	K07562	NMD3; 60S ribosomal export protein NMD3	ko03008	Ribosome biogenesis in eukaryotes
Bm002539	K00943	tmk, DTYMK; dTMP kinase [EC:2.7.4.9]	ko00240	Pyrimidine metabolism
Bm002540	K09503	DNAJA2; DnaJ homolog subfamily A member 2	ko04141	Protein processing in endoplasmic reticulum
Bm002543	K02882	RP-L18Ae, RPL18A; large subunit ribosomal protein L18Ae	ko03010	Ribosome
Bm002555	K02995	RP-S8e, RPS8; small subunit ribosomal protein S8e	ko03010	Ribosome
Bm002561	K10576	UBE2H, UBC8; ubiquitin-conjugating enzyme E2 H [EC:2.3.2.23]	ko04120	Ubiquitin mediated proteolysis
Bm002562	K05605	HIBCH; 3-hydroxyisobutyryl-CoA hydrolase [EC:3.1.2.4]	ko00280	Valine, leucine and isoleucine degradation
Bm002564	K03231	EEF1A; elongation factor 1-alpha	ko03013	Nucleocytoplasmic transport
Bm002574	K00382	DLD, lpd, pdhD; dihydrolipoyl dehydrogenase [EC:1.8.1.4]	ko00260	Glycine, serine and threonine metabolism
Bm002577	K10838	XPC; xeroderma pigmentosum group C-complementing protein	ko03420	Nucleotide excision repair
Bm002588	K02969	RP-S20e, RPS20; small subunit ribosomal protein S20e	ko03010	Ribosome
Bm002589	K00323	NNT; proton-translocating NAD(P)+ transhydrogenase [EC:7.1.1.1]	ko00760	Nicotinate and nicotinamide metabolism
Bm002593	K03941	NDUFS8; NADH dehydrogenase (ubiquinone) Fe-S protein 8 [EC:7.1.1.2]	ko00190	Oxidative phosphorylation
Bm002597	K12843	PRPF3, PRP3; U4/U6 small nuclear ribonucleoprotein PRP3	ko03040	Spliceosome
Bm002599	K14297	NUP98, ADAR2, NUP116; nuclear pore complex protein Nup98-Nup96	ko03013	Nucleocytoplasmic transport
Bm002603	K14409	SMG7, EST1C; protein SMG7	ko03015	mRNA surveillance pathway
Bm002613	K01555	FAH, fahA; fumarylacetoacetase [EC:3.7.1.2]	ko00350	Tyrosine metabolism
Bm002624	K01657	trpE; anthranilate synthase component I [EC:4.1.3.27]	ko00400	Phenylalanine, tyrosine and tryptophan biosynthesis
Bm002651	K02901	RP-L27e, RPL27; large subunit ribosomal protein L27e	ko03010	Ribosome
Bm002660	K11262	ACACA; acetyl-CoA carboxylase / biotin carboxylase 1 [EC:6.4.1.2 6.3.4.14 2.1.3.15]	ko00261	Monobactam biosynthesis
Bm002663	K13412	CPK; calcium-dependent protein kinase [EC:2.7.11.1]	ko04626	Plant-pathogen interaction
Bm002668	K07178	RIOK1; RIO kinase 1 [EC:2.7.11.1]	ko03008	Ribosome biogenesis in eukaryotes
Bm002670	K01637	E4.1.3.1, aceA; isocitrate lyase [EC:4.1.3.1]	ko00630	Glyoxylate and dicarboxylate metabolism
Bm002671	K11262	ACACA; acetyl-CoA carboxylase / biotin carboxylase 1 [EC:6.4.1.2 6.3.4.14 2.1.3.15]	ko00261	Monobactam biosynthesis
Bm002680	K00011	AKR1B; aldehyde reductase [EC:1.1.1.21]	ko00040	Pentose and glucuronate interconversions
Bm002686	K11262	ACACA; acetyl-CoA carboxylase / biotin carboxylase 1 [EC:6.4.1.2 6.3.4.14 2.1.3.15]	ko00261	Monobactam biosynthesis
Bm002692	K01834	PGAM, gpmA; 2,3-bisphosphoglycerate-dependent phosphoglycerate mutase [EC:5.4.2.11]	ko00260	Glycine, serine and threonine metabolism
Bm002694	K12617	PATL1, PAT1; DNA topoisomerase 2-associated protein PAT1	ko03018	RNA degradation
Bm002696	K12617	PATL1, PAT1; DNA topoisomerase 2-associated protein PAT1	ko03018	RNA degradation
Bm002697	K12617	PATL1, PAT1; DNA topoisomerase 2-associated protein PAT1	ko03018	RNA degradation
Bm002698	K12617	PATL1, PAT1; DNA topoisomerase 2-associated protein PAT1	ko03018	RNA degradation
Bm002699	K12617	PATL1, PAT1; DNA topoisomerase 2-associated protein PAT1	ko03018	RNA degradation
Bm002700	K12617	PATL1, PAT1; DNA topoisomerase 2-associated protein PAT1	ko03018	RNA degradation
Bm002703	K03259	EIF4E; translation initiation factor 4E	ko03013	Nucleocytoplasmic transport
Bm002705	K12881	THOC4, ALY; THO complex subunit 4	ko03040	Spliceosome
Bm002706	K12617	PATL1, PAT1; DNA topoisomerase 2-associated protein PAT1	ko03018	RNA degradation
Bm002711	K11099	SNRPG, SMG; small nuclear ribonucleoprotein G	ko03040	Spliceosome
Bm002729	K03679	RRP4, EXOSC2; exosome complex component RRP4	ko03018	RNA degradation
Bm002731	K02872	RP-L13Ae, RPL13A; large subunit ribosomal protein L13Ae	ko03010	Ribosome
Bm002738	K01792	E5.1.3.15; glucose-6-phosphate 1-epimerase [EC:5.1.3.15]	ko00010	Glycolysis / Gluconeogenesis
Bm002740	K00566	mnmA, trmU; tRNA-uridine 2-sulfurtransferase [EC:2.8.1.13]	ko04122	Sulfur relay system
Bm002754	K09490	HSPA5, BIP; endoplasmic reticulum chaperone BiP [EC:3.6.4.10]	ko03060	Protein export
Bm002755	K07375	TUBB; tubulin beta	ko04145	Phagosome
Bm002779	K00626	ACAT, atoB; acetyl-CoA C-acetyltransferase [EC:2.3.1.9]	ko00280	Valine, leucine and isoleucine degradation
Bm002797	K13447	RBOH; respiratory burst oxidase [EC:1.6.3.- 1.11.1.-]	ko04626	Plant-pathogen interaction
Bm002800	K00844	HK; hexokinase [EC:2.7.1.1]	ko00261	Monobactam biosynthesis
Bm002808	K13025	EIF4A3, FAL1; ATP-dependent RNA helicase [EC:3.6.4.13]	ko03040	Spliceosome
Bm002813	K11866	STAMBP, AMSH; STAM-binding protein [EC:3.4.19.12]	ko04144	Endocytosis
Bm002823	K02942	RP-LP1, RPLP1; large subunit ribosomal protein LP1	ko03010	Ribosome
Bm002825	K11866	STAMBP, AMSH; STAM-binding protein [EC:3.4.19.12]	ko04144	Endocytosis
Bm002826	K11866	STAMBP, AMSH; STAM-binding protein [EC:3.4.19.12]	ko04144	Endocytosis
Bm002861	K00026	MDH2; malate dehydrogenase [EC:1.1.1.37]	ko00270	Cysteine and methionine metabolism
Bm002865	K01599	hemE, UROD; uroporphyrinogen decarboxylase [EC:4.1.1.37]	ko00860	Porphyrin metabolism
Bm002868	K00966	GMPP; mannose-1-phosphate guanylyltransferase [EC:2.7.7.13]	ko00051	Fructose and mannose metabolism
Bm002872	K00413	CYC1, CYT1, petC; ubiquinol-cytochrome c reductase cytochrome c1 subunit	ko00190	Oxidative phosphorylation
Bm002876	K12896	SRSF7, SFRS7; serine/arginine-rich splicing factor 7	ko03040	Spliceosome
Bm002877	K12896	SRSF7, SFRS7; serine/arginine-rich splicing factor 7	ko03040	Spliceosome
Bm002881	K12896	SRSF7, SFRS7; serine/arginine-rich splicing factor 7	ko03040	Spliceosome
Bm002882	K10590	TRIP12; E3 ubiquitin-protein ligase TRIP12 [EC:2.3.2.26]	ko04120	Ubiquitin mediated proteolysis
Bm002884	K12896	SRSF7, SFRS7; serine/arginine-rich splicing factor 7	ko03040	Spliceosome
Bm002885	K12890	SRSF1, SFRS1, ASF, SF2; serine/arginine-rich splicing factor 1	ko03040	Spliceosome
Bm002891	K13667	POGLUT1, RUMI, KTELC1; EGF-domain serine glucosyl/xylosyltransferase [EC:2.4.1.376 2.4.2.63]	ko00510	N-Glycan biosynthesis
Bm002902	K01759	GLO1, gloA; lactoylglutathione lyase [EC:4.4.1.5]	ko00620	Pyruvate metabolism
Bm002903	K00511	SQLE, ERG1; squalene monooxygenase [EC:1.14.14.17]	ko00100	Steroid biosynthesis
Bm002915	K02908	RP-L30e, RPL30; large subunit ribosomal protein L30e	ko03010	Ribosome
Bm002922	K14563	NOP1, FBL; rRNA 2'-O-methyltransferase fibrillarin [EC:2.1.1.-]	ko03008	Ribosome biogenesis in eukaryotes
Bm002924	K01187	malZ; alpha-glucosidase [EC:3.2.1.20]	ko00052	Galactose metabolism
Bm002926	K03355	APC8, CDC23; anaphase-promoting complex subunit 8	ko04120	Ubiquitin mediated proteolysis
Bm002934	K08489	STX16; syntaxin 16	ko04130	SNARE interactions in vesicular transport
Bm002943	K14007	SEC24; protein transport protein SEC24	ko04141	Protein processing in endoplasmic reticulum
Bm002949	K02912	RP-L32e, RPL32; large subunit ribosomal protein L32e	ko03010	Ribosome
Bm002950	K00507	SCD, desC; stearoyl-CoA desaturase (Delta-9 desaturase) [EC:1.14.19.1]	ko01040	Biosynthesis of unsaturated fatty acids
Bm002952	K00876	udk, UCK; uridine kinase [EC:2.7.1.48]	ko00240	Pyrimidine metabolism
Bm002954	K19054	FXN; frataxin [EC:1.16.3.1]	ko00860	Porphyrin metabolism
Bm002962	K03265	ETF1, ERF1; peptide chain release factor subunit 1	ko03015	mRNA surveillance pathway
Bm002971	K07151	STT3; dolichyl-diphosphooligosaccharide---protein glycosyltransferase [EC:2.4.99.18]	ko04141	Protein processing in endoplasmic reticulum
Bm002981	K12813	DHX16; pre-mRNA-splicing factor ATP-dependent RNA helicase DHX16 [EC:3.6.4.13]	ko03040	Spliceosome
Bm002993	K14484	IAA; auxin-responsive protein IAA	ko04075	Plant hormone signal transduction
Bm003003	K02976	RP-S26e, RPS26; small subunit ribosomal protein S26e	ko03010	Ribosome
Bm003009	K00469	MIOX; inositol oxygenase [EC:1.13.99.1]	ko00053	Ascorbate and aldarate metabolism
Bm003015	K09458	fabF, OXSM, CEM1; 3-oxoacyl-[acyl-carrier-protein] synthase II [EC:2.3.1.179]	ko00061	Fatty acid biosynthesis
Bm003016	K09458	fabF, OXSM, CEM1; 3-oxoacyl-[acyl-carrier-protein] synthase II [EC:2.3.1.179]	ko00061	Fatty acid biosynthesis
Bm003019	K02707	psbE; photosystem II cytochrome b559 subunit alpha	ko00195	Photosynthesis
Bm003028	K02146	ATPeV0D, ATP6D; V-type H+-transporting ATPase subunit d	ko04145	Phagosome
Bm003041	K00253	IVD, ivd; isovaleryl-CoA dehydrogenase [EC:1.3.8.4]	ko00280	Valine, leucine and isoleucine degradation
Bm003068	K07904	RAB11A; Ras-related protein Rab-11A	ko04144	Endocytosis
Bm003071	K00549	metE; 5-methyltetrahydropteroyltriglutamate--homocysteine methyltransferase [EC:2.1.1.14]	ko00270	Cysteine and methionine metabolism
Bm003072	K00430	E1.11.1.7; peroxidase [EC:1.11.1.7]	ko00940	Phenylpropanoid biosynthesis
Bm003073	K00549	metE; 5-methyltetrahydropteroyltriglutamate--homocysteine methyltransferase [EC:2.1.1.14]	ko00270	Cysteine and methionine metabolism
Bm003075	K00549	metE; 5-methyltetrahydropteroyltriglutamate--homocysteine methyltransferase [EC:2.1.1.14]	ko00270	Cysteine and methionine metabolism
Bm003076	K00549	metE; 5-methyltetrahydropteroyltriglutamate--homocysteine methyltransferase [EC:2.1.1.14]	ko00270	Cysteine and methionine metabolism
Bm003077	K10580	UBE2N, BLU, UBC13; ubiquitin-conjugating enzyme E2 N [EC:2.3.2.23]	ko04120	Ubiquitin mediated proteolysis
Bm003084	K00286	proC; pyrroline-5-carboxylate reductase [EC:1.5.1.2]	ko00330	Arginine and proline metabolism
Bm003087	K11091	SNRPA; U1 small nuclear ribonucleoprotein A	ko03040	Spliceosome
Bm003092	K14496	PYL; abscisic acid receptor PYR/PYL family	ko04075	Plant hormone signal transduction
Bm003094	K00382	DLD, lpd, pdhD; dihydrolipoyl dehydrogenase [EC:1.8.1.4]	ko00260	Glycine, serine and threonine metabolism
Bm003099	K05857	PLCD; phosphatidylinositol phospholipase C, delta [EC:3.1.4.11]	ko04070	Phosphatidylinositol signaling system
Bm003100	K10588	UBE3B; ubiquitin-protein ligase E3 B [EC:2.3.2.26]	ko04120	Ubiquitin mediated proteolysis
Bm003133	K13126	PABPC; polyadenylate-binding protein	ko03018	RNA degradation
Bm003139	K01738	cysK; cysteine synthase [EC:2.5.1.47]	ko00270	Cysteine and methionine metabolism
Bm003140	K01557	FAHD1; acylpyruvate hydrolase [EC:3.7.1.5]	ko00350	Tyrosine metabolism
Bm003151	K02150	ATPeV1E, ATP6E; V-type H+-transporting ATPase subunit E	ko04145	Phagosome
Bm003166	K08054	CANX; calnexin	ko04145	Phagosome
Bm003169	K14303	NUP160, NUP120; nuclear pore complex protein Nup160	ko03013	Nucleocytoplasmic transport
Bm003171	K00826	E2.6.1.42, ilvE; branched-chain amino acid aminotransferase [EC:2.6.1.42]	ko00280	Valine, leucine and isoleucine degradation
Bm003172	K00826	E2.6.1.42, ilvE; branched-chain amino acid aminotransferase [EC:2.6.1.42]	ko00280	Valine, leucine and isoleucine degradation
Bm003178	K05658	ABCB1, CD243; ATP-binding cassette, subfamily B (MDR/TAP), member 1 [EC:7.6.2.2]	ko02010	ABC transporters
Bm003181	K00948	PRPS, prsA; ribose-phosphate pyrophosphokinase [EC:2.7.6.1]	ko00030	Pentose phosphate pathway
Bm003183	K11129	NHP2, NOLA2; H/ACA ribonucleoprotein complex subunit 2	ko03008	Ribosome biogenesis in eukaryotes
Bm003185	K03125	TAF1; transcription initiation factor TFIID subunit 1 [EC:2.3.1.48 2.7.11.1]	ko03022	Basal transcription factors
Bm003188	K07466	RFA1, RPA1, rpa; replication factor A1	ko03030	DNA replication
Bm003191	K00928	lysC; aspartate kinase [EC:2.7.2.4]	ko00260	Glycine, serine and threonine metabolism
Bm003192	K07178	RIOK1; RIO kinase 1 [EC:2.7.11.1]	ko03008	Ribosome biogenesis in eukaryotes
Bm003211	K13420	FLS2; LRR receptor-like serine/threonine-protein kinase FLS2 [EC:2.7.11.1]	ko04626	Plant-pathogen interaction
Bm003212	K13420	FLS2; LRR receptor-like serine/threonine-protein kinase FLS2 [EC:2.7.11.1]	ko04626	Plant-pathogen interaction
Bm003219	K04079	HSP90A, htpG; molecular chaperone HtpG	ko04141	Protein processing in endoplasmic reticulum
Bm003230	K01725	cynS; cyanate lyase [EC:4.2.1.104]	ko00910	Nitrogen metabolism
Bm003233	K10256	FAD2; omega-6 fatty acid desaturase / acyl-lipid omega-6 desaturase (Delta-12 desaturase) [EC:1.14.19.6 1.14.19.22]	ko01040	Biosynthesis of unsaturated fatty acids
Bm003234	K10256	FAD2; omega-6 fatty acid desaturase / acyl-lipid omega-6 desaturase (Delta-12 desaturase) [EC:1.14.19.6 1.14.19.22]	ko01040	Biosynthesis of unsaturated fatty acids
Bm003235	K10843	ERCC3, XPB; DNA excision repair protein ERCC-3 [EC:5.6.2.4]	ko03420	Nucleotide excision repair
Bm003258	K01783	rpe, RPE; ribulose-phosphate 3-epimerase [EC:5.1.3.1]	ko00030	Pentose phosphate pathway
Bm003260	K03120	TBP, tbp; transcription initiation factor TFIID TATA-box-binding protein	ko03022	Basal transcription factors
Bm003271	K08339	ATG5; autophagy-related protein 5	ko04140	Autophagy - animal
Bm003272	K02875	RP-L14e, RPL14; large subunit ribosomal protein L14e	ko03010	Ribosome
Bm003281	K02894	RP-L23e, RPL23; large subunit ribosomal protein L23e	ko03010	Ribosome
Bm003282	K01517	ADPRM; manganese-dependent ADP-ribose/CDP-alcohol diphosphatase [EC:3.6.1.13 3.6.1.16 3.6.1.53]	ko00564	Glycerophospholipid metabolism
Bm003293	K00863	DAK, TKFC; triose/dihydroxyacetone kinase / FAD-AMP lyase (cyclizing) [EC:2.7.1.28 2.7.1.29 4.6.1.15]	ko00561	Glycerolipid metabolism
Bm003308	K12854	SNRNP200, BRR2; pre-mRNA-splicing helicase BRR2 [EC:3.6.4.13]	ko03040	Spliceosome
Bm003309	K12854	SNRNP200, BRR2; pre-mRNA-splicing helicase BRR2 [EC:3.6.4.13]	ko03040	Spliceosome
Bm003310	K00134	GAPDH, gapA; glyceraldehyde 3-phosphate dehydrogenase (phosphorylating) [EC:1.2.1.12]	ko00010	Glycolysis / Gluconeogenesis
Bm003316	K03022	RPC8, POLR3H; DNA-directed RNA polymerase III subunit RPC8	ko03020	RNA polymerase
Bm003317	K03022	RPC8, POLR3H; DNA-directed RNA polymerase III subunit RPC8	ko03020	RNA polymerase
Bm003319	K03022	RPC8, POLR3H; DNA-directed RNA polymerase III subunit RPC8	ko03020	RNA polymerase
Bm003326	K02639	petF; ferredoxin	ko00195	Photosynthesis
Bm003327	K03257	EIF4A; translation initiation factor 4A	ko03013	Nucleocytoplasmic transport
Bm003335	K03260	EIF4G; translation initiation factor 4G	ko03013	Nucleocytoplasmic transport
Bm003375	K06689	UBE2D, UBC4, UBC5; ubiquitin-conjugating enzyme E2 D [EC:2.3.2.23]	ko04120	Ubiquitin mediated proteolysis
Bm003377	K13280	SEC11, sipW; signal peptidase I [EC:3.4.21.89]	ko03060	Protein export
Bm003378	K14326	UPF1, RENT1; regulator of nonsense transcripts 1 [EC:3.6.4.13 5.6.2.3]	ko03013	Nucleocytoplasmic transport
Bm003379	K09584	PDIA6, TXNDC7; protein disulfide-isomerase A6 [EC:5.3.4.1]	ko04141	Protein processing in endoplasmic reticulum
Bm003382	K13457	RPM1, RPS3; disease resistance protein RPM1	ko04626	Plant-pathogen interaction
Bm003383	K13457	RPM1, RPS3; disease resistance protein RPM1	ko04626	Plant-pathogen interaction
Bm003392	K14454	GOT1; aspartate aminotransferase, cytoplasmic [EC:2.6.1.1]	ko00220	Arginine biosynthesis
Bm003393	K13648	GAUT; alpha-1,4-galacturonosyltransferase [EC:2.4.1.43]	ko00500	Starch and sucrose metabolism
Bm003402	K02925	RP-L3e, RPL3; large subunit ribosomal protein L3e	ko03010	Ribosome
Bm003404	K10597	UBE4B, UFD2; ubiquitin conjugation factor E4 B [EC:2.3.2.27]	ko04120	Ubiquitin mediated proteolysis
Bm003415	K02936	RP-L7Ae, RPL7A; large subunit ribosomal protein L7Ae	ko03010	Ribosome
Bm003426	K02896	RP-L24e, RPL24; large subunit ribosomal protein L24e	ko03010	Ribosome
Bm003428	K01885	EARS, gltX; glutamyl-tRNA synthetase [EC:6.1.1.17]	ko00970	Aminoacyl-tRNA biosynthesis
Bm003434	K00294	E1.2.1.88; 1-pyrroline-5-carboxylate dehydrogenase [EC:1.2.1.88]	ko00250	Alanine, aspartate and glutamate metabolism
Bm003451	K12524	thrA; bifunctional aspartokinase / homoserine dehydrogenase 1 [EC:2.7.2.4 1.1.1.3]	ko00260	Glycine, serine and threonine metabolism
Bm003463	K13519	LPT1, ALE1; lysophospholipid acyltransferase [EC:2.3.1.51 2.3.1.23 2.3.1.-]	ko00561	Glycerolipid metabolism
Bm003474	K12828	SF3B1, SAP155; splicing factor 3B subunit 1	ko03040	Spliceosome
Bm003477	K09422	MYBP; transcription factor MYB, plant	ko04626	Plant-pathogen interaction
Bm003480	K12581	CNOT7_8, CAF1, POP2; CCR4-NOT transcription complex subunit 7/8	ko03018	RNA degradation
Bm003482	K02926	RP-L4, MRPL4, rplD; large subunit ribosomal protein L4	ko03010	Ribosome
Bm003484	K14496	PYL; abscisic acid receptor PYR/PYL family	ko04075	Plant hormone signal transduction
Bm003488	K04392	RAC1; Ras-related C3 botulinum toxin substrate 1	ko04145	Phagosome
Bm003489	K02997	RP-S9e, RPS9; small subunit ribosomal protein S9e	ko03010	Ribosome
Bm003492	K14544	UTP22, NOL6; U3 small nucleolar RNA-associated protein 22	ko03008	Ribosome biogenesis in eukaryotes
Bm003500	K00326	CYB5R; cytochrome-b5 reductase [EC:1.6.2.2]	ko00520	Amino sugar and nucleotide sugar metabolism
Bm003505	K00507	SCD, desC; stearoyl-CoA desaturase (Delta-9 desaturase) [EC:1.14.19.1]	ko01040	Biosynthesis of unsaturated fatty acids
Bm003516	K03942	NDUFV1; NADH dehydrogenase (ubiquinone) flavoprotein 1 [EC:7.1.1.2]	ko00190	Oxidative phosphorylation
Bm003539	K00507	SCD, desC; stearoyl-CoA desaturase (Delta-9 desaturase) [EC:1.14.19.1]	ko01040	Biosynthesis of unsaturated fatty acids
Bm003546	K00413	CYC1, CYT1, petC; ubiquinol-cytochrome c reductase cytochrome c1 subunit	ko00190	Oxidative phosphorylation
Bm003550	K10525	AOC; allene oxide cyclase [EC:5.3.99.6]	ko00592	alpha-Linolenic acid metabolism
Bm003572	K00016	LDH, ldh; L-lactate dehydrogenase [EC:1.1.1.27]	ko00270	Cysteine and methionine metabolism
Bm003593	K14491	ARR-B; two-component response regulator ARR-B family	ko04075	Plant hormone signal transduction
Bm003609	K00507	SCD, desC; stearoyl-CoA desaturase (Delta-9 desaturase) [EC:1.14.19.1]	ko01040	Biosynthesis of unsaturated fatty acids
Bm003610	K00507	SCD, desC; stearoyl-CoA desaturase (Delta-9 desaturase) [EC:1.14.19.1]	ko01040	Biosynthesis of unsaturated fatty acids
Bm003612	K02150	ATPeV1E, ATP6E; V-type H+-transporting ATPase subunit E	ko04145	Phagosome
Bm003613	K01634	SGPL1, DPL1; sphinganine-1-phosphate aldolase [EC:4.1.2.27]	ko00600	Sphingolipid metabolism
Bm003624	K16240	SPA1_2; protein suppressor of PHYA-105 1 and protein SPA1-related 2	ko04712	Circadian rhythm - plant
Bm003634	K00052	leuB, IMDH; 3-isopropylmalate dehydrogenase [EC:1.1.1.85]	ko00290	Valine, leucine and isoleucine biosynthesis
Bm003635	K02932	RP-L5e, RPL5; large subunit ribosomal protein L5e	ko03010	Ribosome
Bm003638	K01251	AHCY, ahcY; adenosylhomocysteinase [EC:3.13.2.1]	ko00270	Cysteine and methionine metabolism
Bm003639	K00850	pfkA, PFK; 6-phosphofructokinase 1 [EC:2.7.1.11]	ko03018	RNA degradation
Bm003642	K14568	EMG1, NEP1; rRNA small subunit pseudouridine methyltransferase Nep1 [EC:2.1.1.260]	ko03008	Ribosome biogenesis in eukaryotes
Bm003643	K12261	HACL1; 2-hydroxyacyl-CoA lyase [EC:4.1.2.63]	ko04146	Peroxisome
Bm003644	K14568	EMG1, NEP1; rRNA small subunit pseudouridine methyltransferase Nep1 [EC:2.1.1.260]	ko03008	Ribosome biogenesis in eukaryotes
Bm003646	K14432	ABF; ABA responsive element binding factor	ko04075	Plant hormone signal transduction
Bm003660	K08739	MLH3; DNA mismatch repair protein MLH3	ko03430	Mismatch repair
Bm003661	K01904	4CL; 4-coumarate--CoA ligase [EC:6.2.1.12]	ko00360	Phenylalanine metabolism
Bm003666	K04122	GA3, CYP701; ent-kaurene oxidase [EC:1.14.14.86]	ko00904	Diterpenoid biosynthesis; Including: Gibberellin biosynthesis
Bm003677	K03364	CDH1, FZR1; cell division cycle 20-like protein 1, cofactor of APC complex	ko04120	Ubiquitin mediated proteolysis
Bm003692	K07541	PIGX; GPI mannosyltransferase 1 subunit X	ko00563	Glycosylphosphatidylinositol
Bm003712	K09486	HYOU1; hypoxia up-regulated 1	ko04141	Protein processing in endoplasmic reticulum
Bm003722	K00028	E1.1.1.39; malate dehydrogenase (decarboxylating) [EC:1.1.1.39]	ko00620	Pyruvate metabolism
Bm003745	K14424	SMO2; plant 4alpha-monomethylsterol monooxygenase [EC:1.14.18.11]	ko00100	Steroid biosynthesis
Bm003747	K12833	SF3B14; pre-mRNA branch site protein p14	ko03040	Spliceosome
Bm003749	K02984	RP-S3Ae, RPS3A; small subunit ribosomal protein S3Ae	ko03010	Ribosome
Bm003750	K02984	RP-S3Ae, RPS3A; small subunit ribosomal protein S3Ae	ko03010	Ribosome
Bm003755	K02903	RP-L28e, RPL28; large subunit ribosomal protein L28e	ko03010	Ribosome
Bm003757	K00227	SC5DL, ERG3; Delta7-sterol 5-desaturase [EC:1.14.19.20]	ko00100	Steroid biosynthesis
Bm003763	K00939	adk, AK; adenylate kinase [EC:2.7.4.3]	ko00230	Purine metabolism
Bm003764	K00227	SC5DL, ERG3; Delta7-sterol 5-desaturase [EC:1.14.19.20]	ko00100	Steroid biosynthesis
Bm003771	K03354	APC7, ANAPC7; anaphase-promoting complex subunit 7	ko04120	Ubiquitin mediated proteolysis
Bm003785	K02872	RP-L13Ae, RPL13A; large subunit ribosomal protein L13Ae	ko03010	Ribosome
Bm003792	K00604	MTFMT, fmt; methionyl-tRNA formyltransferase [EC:2.1.2.9]	ko00970	Aminoacyl-tRNA biosynthesis
Bm003796	K04710	CERS1, LASS1; sphingoid base N-stearoyltransferase [EC:2.3.1.299]	ko00600	Sphingolipid metabolism
Bm003797	K02981	RP-S2e, RPS2; small subunit ribosomal protein S2e	ko03010	Ribosome
Bm003799	K02875	RP-L14e, RPL14; large subunit ribosomal protein L14e	ko03010	Ribosome
Bm003804	K03249	EIF3F; translation initiation factor 3 subunit F	ko03013	Nucleocytoplasmic transport
Bm003806	K03249	EIF3F; translation initiation factor 3 subunit F	ko03013	Nucleocytoplasmic transport
Bm003816	K07936	RAN; GTP-binding nuclear protein Ran	ko03008	Ribosome biogenesis in eukaryotes
Bm003817	K14432	ABF; ABA responsive element binding factor	ko04075	Plant hormone signal transduction
Bm003825	K13993	HSP20; HSP20 family protein	ko04141	Protein processing in endoplasmic reticulum
Bm003829	K01638	aceB, glcB; malate synthase [EC:2.3.3.9]	ko00620	Pyruvate metabolism
Bm003830	K01638	aceB, glcB; malate synthase [EC:2.3.3.9]	ko00620	Pyruvate metabolism
Bm003854	K02971	RP-S21e, RPS21; small subunit ribosomal protein S21e	ko03010	Ribosome
Bm003858	K01624	FBA, fbaA; fructose-bisphosphate aldolase, class II [EC:4.1.2.13]	ko00010	Glycolysis / Gluconeogenesis
Bm003879	K03257	EIF4A; translation initiation factor 4A	ko03013	Nucleocytoplasmic transport
Bm003882	K01068	ACOT1_2_4; acyl-coenzyme A thioesterase 1/2/4 [EC:3.1.2.2]	ko00062	Fatty acid elongation
Bm003886	K01611	speD, AMD1; S-adenosylmethionine decarboxylase [EC:4.1.1.50]	ko00270	Cysteine and methionine metabolism
Bm003889	K02938	RP-L8e, RPL8; large subunit ribosomal protein L8e	ko03010	Ribosome
Bm003922	K01890	FARSB, pheT; phenylalanyl-tRNA synthetase beta chain [EC:6.1.1.20]	ko00970	Aminoacyl-tRNA biosynthesis
Bm003927	K11001	PIGY; phosphatidylinositol N-acetylglucosaminyltransferase subunit Y	ko00563	Glycosylphosphatidylinositol
Bm003931	K01648	ACLY; ATP citrate (pro-S)-lyase [EC:2.3.3.8]	ko00020	Citrate cycle
Bm003932	K01648	ACLY; ATP citrate (pro-S)-lyase [EC:2.3.3.8]	ko00020	Citrate cycle
Bm003933	K00161	PDHA, pdhA; pyruvate dehydrogenase E1 component subunit alpha [EC:1.2.4.1]	ko00010	Glycolysis / Gluconeogenesis
Bm003935	K01648	ACLY; ATP citrate (pro-S)-lyase [EC:2.3.3.8]	ko00020	Citrate cycle
Bm003936	K01648	ACLY; ATP citrate (pro-S)-lyase [EC:2.3.3.8]	ko00020	Citrate cycle
Bm003937	K01648	ACLY; ATP citrate (pro-S)-lyase [EC:2.3.3.8]	ko00020	Citrate cycle
Bm003938	K01648	ACLY; ATP citrate (pro-S)-lyase [EC:2.3.3.8]	ko00020	Citrate cycle
Bm003945	K09490	HSPA5, BIP; endoplasmic reticulum chaperone BiP [EC:3.6.4.10]	ko03060	Protein export
Bm003948	K01749	hemC, HMBS; hydroxymethylbilane synthase [EC:2.5.1.61]	ko00860	Porphyrin metabolism
Bm003952	K01867	WARS, trpS; tryptophanyl-tRNA synthetase [EC:6.1.1.2]	ko00970	Aminoacyl-tRNA biosynthesis
Bm003960	K01049	ACHE; acetylcholinesterase [EC:3.1.1.7]	ko00564	Glycerophospholipid metabolism
Bm003967	K02910	RP-L31e, RPL31; large subunit ribosomal protein L31e	ko03010	Ribosome
Bm003974	K02905	RP-L29e, RPL29; large subunit ribosomal protein L29e	ko03010	Ribosome
Bm003976	K07904	RAB11A; Ras-related protein Rab-11A	ko04144	Endocytosis
Bm003984	K02109	ATPF0B, atpF; F-type H+-transporting ATPase subunit b	ko00190	Oxidative phosphorylation
Bm003988	K02935	RP-L7, MRPL12, rplL; large subunit ribosomal protein L7/L12	ko03010	Ribosome
Bm003993	K08504	BET1; blocked early in transport 1	ko04130	SNARE interactions in vesicular transport
Bm003994	K08504	BET1; blocked early in transport 1	ko04130	SNARE interactions in vesicular transport
Bm003995	K08504	BET1; blocked early in transport 1	ko04130	SNARE interactions in vesicular transport
Bm004000	K00815	TAT; tyrosine aminotransferase [EC:2.6.1.5]	ko00270	Cysteine and methionine metabolism
Bm004003	K05350	bglB; beta-glucosidase [EC:3.2.1.21]	ko00940	Phenylpropanoid biosynthesis
Bm004004	K02934	RP-L6e, RPL6; large subunit ribosomal protein L6e	ko03010	Ribosome
Bm004006	K12946	SPCS1; signal peptidase complex subunit 1 [EC:3.4.-.-]	ko03060	Protein export
Bm004007	K03283	HSPA1_6_8; heat shock 70kDa protein 1/6/8	ko04144	Endocytosis
Bm004013	K04079	HSP90A, htpG; molecular chaperone HtpG	ko04141	Protein processing in endoplasmic reticulum
Bm004014	K12827	SF3A3, SAP61, PRP9; splicing factor 3A subunit 3	ko03040	Spliceosome
Bm004015	K13356	FAR; alcohol-forming fatty acyl-CoA reductase [EC:1.2.1.84]	ko04146	Peroxisome
Bm004017	K01183	E3.2.1.14; chitinase [EC:3.2.1.14]	ko00520	Amino sugar and nucleotide sugar metabolism
Bm004022	K10364	CAPZA; F-actin-capping protein subunit alpha	ko04144	Endocytosis
Bm004023	K10364	CAPZA; F-actin-capping protein subunit alpha	ko04144	Endocytosis
Bm004024	K00128	ALDH; aldehyde dehydrogenase (NAD+) [EC:1.2.1.3]	ko00280	Valine, leucine and isoleucine degradation
Bm004025	K00128	ALDH; aldehyde dehydrogenase (NAD+) [EC:1.2.1.3]	ko00280	Valine, leucine and isoleucine degradation
Bm004032	K11883	NOB1; RNA-binding protein NOB1	ko03008	Ribosome biogenesis in eukaryotes
Bm004037	K00726	MGAT1; alpha-1,3-mannosyl-glycoprotein beta-1,2-N-acetylglucosaminyltransferase [EC:2.4.1.101]	ko00510	N-Glycan biosynthesis
Bm004038	K03283	HSPA1_6_8; heat shock 70kDa protein 1/6/8	ko04144	Endocytosis
Bm004039	K11883	NOB1; RNA-binding protein NOB1	ko03008	Ribosome biogenesis in eukaryotes
Bm004046	K03283	HSPA1_6_8; heat shock 70kDa protein 1/6/8	ko04144	Endocytosis
Bm004048	K13425	WRKY22; WRKY transcription factor 22	ko04626	Plant-pathogen interaction
Bm004049	K13425	WRKY22; WRKY transcription factor 22	ko04626	Plant-pathogen interaction
Bm004053	K02639	petF; ferredoxin	ko00195	Photosynthesis
Bm004068	K01900	LSC2; succinyl-CoA synthetase beta subunit [EC:6.2.1.4 6.2.1.5]	ko00020	Citrate cycle
Bm004069	K07901	RAB8A, MEL; Ras-related protein Rab-8A	ko04144	Endocytosis
Bm004080	K01070	frmB, ESD, fghA; S-formylglutathione hydrolase [EC:3.1.2.12]	ko01200	Carbon metabolism
Bm004088	K14491	ARR-B; two-component response regulator ARR-B family	ko04075	Plant hormone signal transduction
Bm004091	K03715	MGD; 1,2-diacylglycerol 3-beta-galactosyltransferase [EC:2.4.1.46]	ko00561	Glycerolipid metabolism
Bm004105	K10743	RNASEH2A; ribonuclease H2 subunit A [EC:3.1.26.4]	ko03030	DNA replication
Bm004106	K10743	RNASEH2A; ribonuclease H2 subunit A [EC:3.1.26.4]	ko03030	DNA replication
Bm004124	K10581	UBE2O; ubiquitin-conjugating enzyme E2 O [EC:2.3.2.24]	ko04120	Ubiquitin mediated proteolysis
Bm004126	K00621	GNPNAT1, GNA1; glucosamine-phosphate N-acetyltransferase [EC:2.3.1.4]	ko00520	Amino sugar and nucleotide sugar metabolism
Bm004153	K09843	CYP707A; (+)-abscisic acid 8'-hydroxylase [EC:1.14.14.137]	ko00906	Carotenoid biosynthesis
Bm004154	K09843	CYP707A; (+)-abscisic acid 8'-hydroxylase [EC:1.14.14.137]	ko00906	Carotenoid biosynthesis
Bm004155	K14376	PAP; poly(A) polymerase [EC:2.7.7.19]	ko03015	mRNA surveillance pathway
Bm004156	K14376	PAP; poly(A) polymerase [EC:2.7.7.19]	ko03015	mRNA surveillance pathway
Bm004157	K14376	PAP; poly(A) polymerase [EC:2.7.7.19]	ko03015	mRNA surveillance pathway
Bm004160	K14376	PAP; poly(A) polymerase [EC:2.7.7.19]	ko03015	mRNA surveillance pathway
Bm004168	K00026	MDH2; malate dehydrogenase [EC:1.1.1.37]	ko00270	Cysteine and methionine metabolism
Bm004169	K03283	HSPA1_6_8; heat shock 70kDa protein 1/6/8	ko04144	Endocytosis
Bm004171	K00026	MDH2; malate dehydrogenase [EC:1.1.1.37]	ko00270	Cysteine and methionine metabolism
Bm004187	K00134	GAPDH, gapA; glyceraldehyde 3-phosphate dehydrogenase (phosphorylating) [EC:1.2.1.12]	ko00010	Glycolysis / Gluconeogenesis
Bm004188	K14491	ARR-B; two-component response regulator ARR-B family	ko04075	Plant hormone signal transduction
Bm004193	K08488	STX7; syntaxin 7	ko04145	Phagosome
Bm004194	K00134	GAPDH, gapA; glyceraldehyde 3-phosphate dehydrogenase (phosphorylating) [EC:1.2.1.12]	ko00010	Glycolysis / Gluconeogenesis
Bm004209	K02875	RP-L14e, RPL14; large subunit ribosomal protein L14e	ko03010	Ribosome
Bm004218	K02941	RP-LP0, RPLP0; large subunit ribosomal protein LP0	ko03010	Ribosome
Bm004229	K02516	PRMT5, HSL7; type II protein arginine methyltransferase [EC:2.1.1.320]	ko03013	Nucleocytoplasmic transport
Bm004246	K00939	adk, AK; adenylate kinase [EC:2.7.4.3]	ko00230	Purine metabolism
Bm004247	K03260	EIF4G; translation initiation factor 4G	ko03013	Nucleocytoplasmic transport
Bm004248	K03260	EIF4G; translation initiation factor 4G	ko03013	Nucleocytoplasmic transport
Bm004255	K04649	UBE2K, HIP2, UBC1; ubiquitin-conjugating enzyme (huntingtin interacting protein 2) [EC:2.3.2.23]	ko04120	Ubiquitin mediated proteolysis
Bm004261	K01008	selD, SEPHS; selenide, water dikinase [EC:2.7.9.3]	ko00450	Selenocompound metabolism
Bm004270	K03138	TFIIF1, GTF2F1, TFG1; transcription initiation factor TFIIF subunit alpha	ko03022	Basal transcription factors
Bm004271	K02984	RP-S3Ae, RPS3A; small subunit ribosomal protein S3Ae	ko03010	Ribosome
Bm004272	K00279	CKX; cytokinin dehydrogenase [EC:1.5.99.12]	ko00908	Zeatin biosynthesis
Bm004277	K00134	GAPDH, gapA; glyceraldehyde 3-phosphate dehydrogenase (phosphorylating) [EC:1.2.1.12]	ko00010	Glycolysis / Gluconeogenesis
Bm004279	K14312	NUP155, NUP170, NUP157; nuclear pore complex protein Nup155	ko03013	Nucleocytoplasmic transport
Bm004280	K00134	GAPDH, gapA; glyceraldehyde 3-phosphate dehydrogenase (phosphorylating) [EC:1.2.1.12]	ko00010	Glycolysis / Gluconeogenesis
Bm004285	K01823	idi, IDI; isopentenyl-diphosphate Delta-isomerase [EC:5.3.3.2]	ko00900	Terpenoid backbone biosynthesis
Bm004296	K09422	MYBP; transcription factor MYB, plant	ko04626	Plant-pathogen interaction
Bm004306	K04121	E4.2.3.19; ent-kaurene synthase [EC:4.2.3.19]	ko00904	Diterpenoid biosynthesis; Including: Gibberellin biosynthesis
Bm004314	K02995	RP-S8e, RPS8; small subunit ribosomal protein S8e	ko03010	Ribosome
Bm004325	K00789	metK, MAT; S-adenosylmethionine synthetase [EC:2.5.1.6]	ko00270	Cysteine and methionine metabolism
Bm004330	K13448	CML; calcium-binding protein CML	ko04626	Plant-pathogen interaction
Bm004331	K12121	PHYB; phytochrome B	ko04712	Circadian rhythm - plant
Bm004343	K09480	DGD; digalactosyldiacylglycerol synthase [EC:2.4.1.241]	ko00561	Glycerolipid metabolism
Bm004345	K00789	metK, MAT; S-adenosylmethionine synthetase [EC:2.5.1.6]	ko00270	Cysteine and methionine metabolism
Bm004346	K01610	pckA; phosphoenolpyruvate carboxykinase (ATP) [EC:4.1.1.49]	ko00010	Glycolysis / Gluconeogenesis
Bm004348	K00889	PIP5K; 1-phosphatidylinositol-4-phosphate 5-kinase [EC:2.7.1.68]	ko04144	Endocytosis
Bm004350	K01689	ENO, eno; enolase [EC:4.2.1.11]	ko03018	RNA degradation
Bm004361	K00858	ppnK, NADK; NAD+ kinase [EC:2.7.1.23]	ko00760	Nicotinate and nicotinamide metabolism
Bm004367	K01693	hisB; imidazoleglycerol-phosphate dehydratase [EC:4.2.1.19]	ko00340	Histidine metabolism
Bm004368	K01693	hisB; imidazoleglycerol-phosphate dehydratase [EC:4.2.1.19]	ko00340	Histidine metabolism
Bm004369	K01693	hisB; imidazoleglycerol-phosphate dehydratase [EC:4.2.1.19]	ko00340	Histidine metabolism
Bm004372	K01693	hisB; imidazoleglycerol-phosphate dehydratase [EC:4.2.1.19]	ko00340	Histidine metabolism
Bm004374	K01693	hisB; imidazoleglycerol-phosphate dehydratase [EC:4.2.1.19]	ko00340	Histidine metabolism
Bm004383	K12873	BUD31, G10; bud site selection protein 31	ko03040	Spliceosome
Bm004388	K02987	RP-S4e, RPS4; small subunit ribosomal protein S4e	ko03010	Ribosome
Bm004397	K14510	CTR1; serine/threonine-protein kinase CTR1 [EC:2.7.11.1]	ko04075	Plant hormone signal transduction
Bm004398	K14510	CTR1; serine/threonine-protein kinase CTR1 [EC:2.7.11.1]	ko04075	Plant hormone signal transduction
Bm004403	K05391	CNGC; cyclic nucleotide gated channel, plant	ko04626	Plant-pathogen interaction
Bm004404	K11866	STAMBP, AMSH; STAM-binding protein [EC:3.4.19.12]	ko04144	Endocytosis
Bm004407	K00432	gpx, btuE, bsaA; glutathione peroxidase [EC:1.11.1.9]	ko00590	Arachidonic acid metabolism
Bm004418	K02976	RP-S26e, RPS26; small subunit ribosomal protein S26e	ko03010	Ribosome
Bm004425	K12815	DHX38, PRP16; pre-mRNA-splicing factor ATP-dependent RNA helicase DHX38/PRP16 [EC:3.6.4.13]	ko03040	Spliceosome
Bm004430	K09753	CCR; cinnamoyl-CoA reductase [EC:1.2.1.44]	ko00940	Phenylpropanoid biosynthesis
Bm004431	K02689	psaA; photosystem I P700 chlorophyll a apoprotein A1 [EC:1.97.1.12]	ko00195	Photosynthesis
Bm004449	K01958	PC, pyc; pyruvate carboxylase [EC:6.4.1.1]	ko00020	Citrate cycle
Bm004450	K01958	PC, pyc; pyruvate carboxylase [EC:6.4.1.1]	ko00020	Citrate cycle
Bm004451	K00863	DAK, TKFC; triose/dihydroxyacetone kinase / FAD-AMP lyase (cyclizing) [EC:2.7.1.28 2.7.1.29 4.6.1.15]	ko00561	Glycerolipid metabolism
Bm004452	K00472	P4HA; prolyl 4-hydroxylase [EC:1.14.11.2]	ko00330	Arginine and proline metabolism
Bm004462	K02910	RP-L31e, RPL31; large subunit ribosomal protein L31e	ko03010	Ribosome
Bm004472	K12823	DDX5, DBP2; ATP-dependent RNA helicase DDX5/DBP2 [EC:3.6.4.13]	ko03040	Spliceosome
Bm004477	K00430	E1.11.1.7; peroxidase [EC:1.11.1.7]	ko00940	Phenylpropanoid biosynthesis
Bm004478	K00430	E1.11.1.7; peroxidase [EC:1.11.1.7]	ko00940	Phenylpropanoid biosynthesis
Bm004480	K11827	AP2S1; AP-2 complex subunit sigma-1	ko04144	Endocytosis
Bm004484	K12826	SF3A2, SAP62; splicing factor 3A subunit 2	ko03040	Spliceosome
Bm004487	K12822	RBM25, S164; RNA-binding protein 25	ko03040	Spliceosome
Bm004488	K18592	GGT1_5, CD224; gamma-glutamyltranspeptidase / glutathione hydrolase / leukotriene-C4 hydrolase [EC:2.3.2.2 3.4.19.13 3.4.19.14]	ko00590	Arachidonic acid metabolism
Bm004495	K18592	GGT1_5, CD224; gamma-glutamyltranspeptidase / glutathione hydrolase / leukotriene-C4 hydrolase [EC:2.3.2.2 3.4.19.13 3.4.19.14]	ko00590	Arachidonic acid metabolism
Bm004498	K01115	PLD1_2; phospholipase D1/2 [EC:3.1.4.4]	ko04144	Endocytosis
Bm004502	K14514	EIN3; ethylene-insensitive protein 3	ko04075	Plant hormone signal transduction
Bm004503	K06689	UBE2D, UBC4, UBC5; ubiquitin-conjugating enzyme E2 D [EC:2.3.2.23]	ko04120	Ubiquitin mediated proteolysis
Bm004520	K13344	PEX13; peroxin-13	ko04146	Peroxisome
Bm004524	K10580	UBE2N, BLU, UBC13; ubiquitin-conjugating enzyme E2 N [EC:2.3.2.23]	ko04120	Ubiquitin mediated proteolysis
Bm004540	K02976	RP-S26e, RPS26; small subunit ribosomal protein S26e	ko03010	Ribosome
Bm004549	K09490	HSPA5, BIP; endoplasmic reticulum chaperone BiP [EC:3.6.4.10]	ko03060	Protein export
Bm004563	K02266	COX6A; cytochrome c oxidase subunit 6a	ko00190	Oxidative phosphorylation
Bm004578	K01613	psd, PISD; phosphatidylserine decarboxylase [EC:4.1.1.65]	ko00564	Glycerophospholipid metabolism
Bm004579	K01613	psd, PISD; phosphatidylserine decarboxylase [EC:4.1.1.65]	ko00564	Glycerophospholipid metabolism
Bm004581	K01613	psd, PISD; phosphatidylserine decarboxylase [EC:4.1.1.65]	ko00564	Glycerophospholipid metabolism
Bm004585	K00234	SDHA, SDH1; succinate dehydrogenase (ubiquinone) flavoprotein subunit [EC:1.3.5.1]	ko00020	Citrate cycle
Bm004604	K01889	FARSA, pheS; phenylalanyl-tRNA synthetase alpha chain [EC:6.1.1.20]	ko00970	Aminoacyl-tRNA biosynthesis
Bm004609	K13941	folKP; 2-amino-4-hydroxy-6-hydroxymethyldihydropteridine diphosphokinase / dihydropteroate synthase [EC:2.7.6.3 2.5.1.15]	ko00790	Folate biosynthesis
Bm004613	K10598	PPIL2, CYC4, CHP60; peptidyl-prolyl cis-trans isomerase-like 2 [EC:5.2.1.8]	ko04120	Ubiquitin mediated proteolysis
Bm004618	K00820	glmS, GFPT; glutamine---fructose-6-phosphate transaminase (isomerizing) [EC:2.6.1.16]	ko00250	Alanine, aspartate and glutamate metabolism
Bm004629	K03941	NDUFS8; NADH dehydrogenase (ubiquinone) Fe-S protein 8 [EC:7.1.1.2]	ko00190	Oxidative phosphorylation
Bm004632	K02951	RP-S12e, RPS12; small subunit ribosomal protein S12e	ko03010	Ribosome
Bm004639	K00507	SCD, desC; stearoyl-CoA desaturase (Delta-9 desaturase) [EC:1.14.19.1]	ko01040	Biosynthesis of unsaturated fatty acids
Bm004643	K00921	PIKFYVE, FAB1; 1-phosphatidylinositol-3-phosphate 5-kinase [EC:2.7.1.150]	ko04145	Phagosome
Bm004646	K00600	glyA, SHMT; glycine hydroxymethyltransferase [EC:2.1.2.1]	ko00260	Glycine, serine and threonine metabolism
Bm004648	K00507	SCD, desC; stearoyl-CoA desaturase (Delta-9 desaturase) [EC:1.14.19.1]	ko01040	Biosynthesis of unsaturated fatty acids
Bm004653	K12373	HEXA_B; hexosaminidase [EC:3.2.1.52]	ko00520	Amino sugar and nucleotide sugar metabolism
Bm004655	K05663	#N/A	ko02010	ABC transporters
Bm004656	K05663	#N/A	ko02010	ABC transporters
Bm004661	K07936	RAN; GTP-binding nuclear protein Ran	ko03008	Ribosome biogenesis in eukaryotes
Bm004669	K03283	HSPA1_6_8; heat shock 70kDa protein 1/6/8	ko04144	Endocytosis
Bm004692	K01647	CS, gltA; citrate synthase [EC:2.3.3.1]	ko00020	Citrate cycle
Bm004693	K01647	CS, gltA; citrate synthase [EC:2.3.3.1]	ko00020	Citrate cycle
Bm004695	K18464	RTSC, SPG8; WASH complex subunit strumpellin	ko04144	Endocytosis
Bm004707	K03252	EIF3C; translation initiation factor 3 subunit C	ko03013	Nucleocytoplasmic transport
Bm004716	K14489	AHK2_3_4; arabidopsis histidine kinase 2/3/4 (cytokinin receptor) [EC:2.7.13.3]	ko04075	Plant hormone signal transduction
Bm004717	K08730	PTDSS2; phosphatidylserine synthase 2 [EC:2.7.8.29]	ko00564	Glycerophospholipid metabolism
Bm004721	K14489	AHK2_3_4; arabidopsis histidine kinase 2/3/4 (cytokinin receptor) [EC:2.7.13.3]	ko04075	Plant hormone signal transduction
Bm004722	K14489	AHK2_3_4; arabidopsis histidine kinase 2/3/4 (cytokinin receptor) [EC:2.7.13.3]	ko04075	Plant hormone signal transduction
Bm004725	K13456	RIN4; RPM1-interacting protein 4	ko04626	Plant-pathogen interaction
Bm004726	K13456	RIN4; RPM1-interacting protein 4	ko04626	Plant-pathogen interaction
Bm004727	K00940	ndk, NME; nucleoside-diphosphate kinase [EC:2.7.4.6]	ko00230	Purine metabolism
Bm004729	K00430	E1.11.1.7; peroxidase [EC:1.11.1.7]	ko00940	Phenylpropanoid biosynthesis
Bm004731	K03066	PSMC5, RPT6; 26S proteasome regulatory subunit T6	ko03050	Proteasome
Bm004744	K10838	XPC; xeroderma pigmentosum group C-complementing protein	ko03420	Nucleotide excision repair
Bm004746	K00161	PDHA, pdhA; pyruvate dehydrogenase E1 component subunit alpha [EC:1.2.4.1]	ko00010	Glycolysis / Gluconeogenesis
Bm004749	K17108	GBA2; non-lysosomal glucosylceramidase [EC:3.2.1.45]	ko00511	Other glycan degradation
Bm004750	K14455	GOT2; aspartate aminotransferase, mitochondrial [EC:2.6.1.1]	ko00220	Arginine biosynthesis
Bm004759	K01255	CARP, pepA; leucyl aminopeptidase [EC:3.4.11.1]	ko00480	Glutathione metabolism
Bm004763	K14564	NOP56; nucleolar protein 56	ko03008	Ribosome biogenesis in eukaryotes
Bm004768	K03251	EIF3D; translation initiation factor 3 subunit D	ko03013	Nucleocytoplasmic transport
Bm004769	K02989	RP-S5e, RPS5; small subunit ribosomal protein S5e	ko03010	Ribosome
Bm004770	K00026	MDH2; malate dehydrogenase [EC:1.1.1.37]	ko00270	Cysteine and methionine metabolism
Bm004775	K04392	RAC1; Ras-related C3 botulinum toxin substrate 1	ko04145	Phagosome
Bm004784	K01681	ACO, acnA; aconitate hydratase [EC:4.2.1.3]	ko00020	Citrate cycle
Bm004785	K01681	ACO, acnA; aconitate hydratase [EC:4.2.1.3]	ko00020	Citrate cycle
Bm004801	K00262	E1.4.1.4, gdhA; glutamate dehydrogenase (NADP+) [EC:1.4.1.4]	ko00220	Arginine biosynthesis
Bm004811	K15634	gpmB; 2,3-bisphosphoglycerate-dependent phosphoglycerate mutase [EC:5.4.2.11]	ko00260	Glycine, serine and threonine metabolism
Bm004813	K12875	ACIN1, ACINUS; apoptotic chromatin condensation inducer in the nucleus	ko03040	Spliceosome
Bm004828	K01835	pgm; phosphoglucomutase [EC:5.4.2.2]	ko00010	Glycolysis / Gluconeogenesis
Bm004829	K01835	pgm; phosphoglucomutase [EC:5.4.2.2]	ko00010	Glycolysis / Gluconeogenesis
Bm004830	K01835	pgm; phosphoglucomutase [EC:5.4.2.2]	ko00010	Glycolysis / Gluconeogenesis
Bm004831	K03123	TFIIA2, GTF2A2, TOA2; transcription initiation factor TFIIA small subunit	ko03022	Basal transcription factors
Bm004853	K02976	RP-S26e, RPS26; small subunit ribosomal protein S26e	ko03010	Ribosome
Bm004871	K03246	EIF3I; translation initiation factor 3 subunit I	ko03013	Nucleocytoplasmic transport
Bm004879	K00088	IMPDH, guaB; IMP dehydrogenase [EC:1.1.1.205]	ko00230	Purine metabolism
Bm004882	K07573	CSL4, EXOSC1; exosome complex component CSL4	ko03018	RNA degradation
Bm004918	K01051	E3.1.1.11; pectinesterase [EC:3.1.1.11]	ko00040	Pentose and glucuronate interconversions
Bm004939	K09422	MYBP; transcription factor MYB, plant	ko04626	Plant-pathogen interaction
Bm004945	K12812	DDX39B, UAP56, SUB2; ATP-dependent RNA helicase UAP56/SUB2 [EC:3.6.4.13]	ko03040	Spliceosome
Bm004964	K03553	recA; recombination protein RecA	ko03440	Homologous recombination
Bm004970	K03553	recA; recombination protein RecA	ko03440	Homologous recombination
Bm004977	K08852	ERN1; serine/threonine-protein kinase/endoribonuclease IRE1 [EC:2.7.11.1 3.1.26.-]	ko04141	Protein processing in endoplasmic reticulum
Bm004981	K03955	NDUFAB1; NADH dehydrogenase (ubiquinone) 1 alpha/beta subcomplex 1, acyl-carrier protein	ko00190	Oxidative phosphorylation
Bm004991	K01597	MVD, mvaD; diphosphomevalonate decarboxylase [EC:4.1.1.33]	ko00900	Terpenoid backbone biosynthesis
Bm004997	K02971	RP-S21e, RPS21; small subunit ribosomal protein S21e	ko03010	Ribosome
Bm005001	K02261	COX2; cytochrome c oxidase subunit 2	ko00190	Oxidative phosphorylation
Bm005003	K16860	PLD3_4; phospholipase D3/4 [EC:3.1.4.4]	ko00564	Glycerophospholipid metabolism
Bm005004	K13248	PHOSPHO2; pyridoxal phosphate phosphatase PHOSPHO2 [EC:3.1.3.74]	ko00750	Vitamin B6 metabolism
Bm005024	K14496	PYL; abscisic acid receptor PYR/PYL family	ko04075	Plant hormone signal transduction
Bm005025	K10871	RAD51L3, RAD51D; RAD51-like protein 3	ko03440	Homologous recombination
Bm005041	K12815	DHX38, PRP16; pre-mRNA-splicing factor ATP-dependent RNA helicase DHX38/PRP16 [EC:3.6.4.13]	ko03040	Spliceosome
Bm005045	K00383	GSR, gor; glutathione reductase (NADPH) [EC:1.8.1.7]	ko00480	Glutathione metabolism
Bm005046	K18677	GALAK; galacturonokinase [EC:2.7.1.44]	ko00520	Amino sugar and nucleotide sugar metabolism
Bm005048	K02937	RP-L7e, RPL7; large subunit ribosomal protein L7e	ko03010	Ribosome
Bm005050	K07953	SAR1; GTP-binding protein SAR1 [EC:3.6.5.-]	ko04141	Protein processing in endoplasmic reticulum
Bm005056	K03937	NDUFS4; NADH dehydrogenase (ubiquinone) Fe-S protein 4	ko00190	Oxidative phosphorylation
Bm005063	K01188	E3.2.1.21; beta-glucosidase [EC:3.2.1.21]	ko00940	Phenylpropanoid biosynthesis
Bm005064	K01188	E3.2.1.21; beta-glucosidase [EC:3.2.1.21]	ko00940	Phenylpropanoid biosynthesis
Bm005071	K00008	SORD, gutB; L-iditol 2-dehydrogenase [EC:1.1.1.14]	ko00040	Pentose and glucuronate interconversions
Bm005082	K02739	PSMB7; 20S proteasome subunit beta 2 [EC:3.4.25.1]	ko03050	Proteasome
Bm005086	K03006	RPB1, POLR2A; DNA-directed RNA polymerase II subunit RPB1 [EC:2.7.7.6]	ko03020	RNA polymerase
Bm005093	K14566	UTP24, FCF1; U3 small nucleolar RNA-associated protein 24	ko03008	Ribosome biogenesis in eukaryotes
Bm005110	K02925	RP-L3e, RPL3; large subunit ribosomal protein L3e	ko03010	Ribosome
Bm005119	K02183	CALM; calmodulin	ko04070	Phosphatidylinositol signaling system
Bm005129	K12670	DDOST, WBP1; dolichyl-diphosphooligosaccharide---protein glycosyltransferase subunit DDOST/WBP1	ko04141	Protein processing in endoplasmic reticulum
Bm005142	K12275	SEC62; translocation protein SEC62	ko03060	Protein export
Bm005143	K02947	RP-S10e, RPS10; small subunit ribosomal protein S10e	ko03010	Ribosome
Bm005144	K12275	SEC62; translocation protein SEC62	ko03060	Protein export
Bm005145	K12275	SEC62; translocation protein SEC62	ko03060	Protein export
Bm005152	K13126	PABPC; polyadenylate-binding protein	ko03018	RNA degradation
Bm005153	K12668	DAD1, OST2; dolichyl-diphosphooligosaccharide---protein glycosyltransferase subunit DAD1/OST2	ko04141	Protein processing in endoplasmic reticulum
Bm005162	K00660	CHS; chalcone synthase [EC:2.3.1.74]	ko00941	Flavonoid biosynthesis
Bm005174	K01689	ENO, eno; enolase [EC:4.2.1.11]	ko03018	RNA degradation
Bm005183	K00419	QCR9, UCRC; ubiquinol-cytochrome c reductase subunit 9	ko00190	Oxidative phosphorylation
Bm005184	K02882	RP-L18Ae, RPL18A; large subunit ribosomal protein L18Ae	ko03010	Ribosome
Bm005185	K02962	RP-S17e, RPS17; small subunit ribosomal protein S17e	ko03010	Ribosome
Bm005191	K02924	RP-L39e, RPL39; large subunit ribosomal protein L39e	ko03010	Ribosome
Bm005196	K01892	HARS, hisS; histidyl-tRNA synthetase [EC:6.1.1.21]	ko00970	Aminoacyl-tRNA biosynthesis
Bm005207	K07513	ACAA1; acetyl-CoA acyltransferase 1 [EC:2.3.1.16]	ko04146	Peroxisome
Bm005208	K07513	ACAA1; acetyl-CoA acyltransferase 1 [EC:2.3.1.16]	ko04146	Peroxisome
Bm005209	K07513	ACAA1; acetyl-CoA acyltransferase 1 [EC:2.3.1.16]	ko04146	Peroxisome
Bm005211	K02985	RP-S3e, RPS3; small subunit ribosomal protein S3e	ko03010	Ribosome
Bm005212	K02985	RP-S3e, RPS3; small subunit ribosomal protein S3e	ko03010	Ribosome
Bm005228	K01778	dapF; diaminopimelate epimerase [EC:5.1.1.7]	ko00300	Lysine biosynthesis
Bm005230	K00232	E1.3.3.6, ACOX1, ACOX3; acyl-CoA oxidase [EC:1.3.3.6]	ko04146	Peroxisome
Bm005233	K00948	PRPS, prsA; ribose-phosphate pyrophosphokinase [EC:2.7.6.1]	ko00030	Pentose phosphate pathway
Bm005241	K09422	MYBP; transcription factor MYB, plant	ko04626	Plant-pathogen interaction
Bm005248	K06943	NOG1; nucleolar GTP-binding protein	ko03008	Ribosome biogenesis in eukaryotes
Bm005271	K01937	pyrG, CTPS; CTP synthase [EC:6.3.4.2]	ko00240	Pyrimidine metabolism
Bm005274	K01681	ACO, acnA; aconitate hydratase [EC:4.2.1.3]	ko00020	Citrate cycle
Bm005276	K10143	RFWD2, COP1; E3 ubiquitin-protein ligase RFWD2 [EC:2.3.2.27]	ko04120	Ubiquitin mediated proteolysis
Bm005277	K03935	NDUFS2; NADH dehydrogenase (ubiquinone) Fe-S protein 2 [EC:7.1.1.2]	ko00190	Oxidative phosphorylation
Bm005281	K01634	SGPL1, DPL1; sphinganine-1-phosphate aldolase [EC:4.1.2.27]	ko00600	Sphingolipid metabolism
Bm005293	K13415	BRI1; protein brassinosteroid insensitive 1 [EC:2.7.10.1 2.7.11.1]	ko04075	Plant hormone signal transduction
Bm005310	K07375	TUBB; tubulin beta	ko04145	Phagosome
Bm005318	K00869	MVK, mvaK1; mevalonate kinase [EC:2.7.1.36]	ko04146	Peroxisome
Bm005331	K11599	POMP, UMP1; proteasome maturation protein	ko03050	Proteasome
Bm005336	K07964	HPSE; heparanase [EC:3.2.1.166]	ko00531	Glycosaminoglycan degradation
Bm005354	K00121	frmA, ADH5, adhC; S-(hydroxymethyl)glutathione dehydrogenase / alcohol dehydrogenase [EC:1.1.1.284 1.1.1.1]	ko00350	Tyrosine metabolism
Bm005357	K02974	RP-S24e, RPS24; small subunit ribosomal protein S24e	ko03010	Ribosome
Bm005383	K04554	UBE2J2, NCUBE2, UBC6; ubiquitin-conjugating enzyme E2 J2 [EC:2.3.2.23]	ko04120	Ubiquitin mediated proteolysis
Bm005386	K00232	E1.3.3.6, ACOX1, ACOX3; acyl-CoA oxidase [EC:1.3.3.6]	ko04146	Peroxisome
Bm005388	K02552	menF; menaquinone-specific isochorismate synthase [EC:5.4.4.2]	ko00130	Ubiquinone and other terpenoid-quinone biosynthesis
Bm005392	K12608	CAF16; CCR4-NOT complex subunit CAF16	ko03018	RNA degradation
Bm005400	K00799	GST, gst; glutathione S-transferase [EC:2.5.1.18]	ko00480	Glutathione metabolism
Bm005401	K14502	BIN2; protein brassinosteroid insensitive 2 [EC:2.7.11.1]	ko04075	Plant hormone signal transduction
Bm005409	K13457	RPM1, RPS3; disease resistance protein RPM1	ko04626	Plant-pathogen interaction
Bm005410	K01890	FARSB, pheT; phenylalanyl-tRNA synthetase beta chain [EC:6.1.1.20]	ko00970	Aminoacyl-tRNA biosynthesis
Bm005418	K02891	RP-L22e, RPL22; large subunit ribosomal protein L22e	ko03010	Ribosome
Bm005422	K01890	FARSB, pheT; phenylalanyl-tRNA synthetase beta chain [EC:6.1.1.20]	ko00970	Aminoacyl-tRNA biosynthesis
Bm005424	K00787	FDPS; farnesyl diphosphate synthase [EC:2.5.1.1 2.5.1.10]	ko00900	Terpenoid backbone biosynthesis
Bm005432	K02973	RP-S23e, RPS23; small subunit ribosomal protein S23e	ko03010	Ribosome
Bm005452	K08739	MLH3; DNA mismatch repair protein MLH3	ko03430	Mismatch repair
Bm005453	K08739	MLH3; DNA mismatch repair protein MLH3	ko03430	Mismatch repair
Bm005454	K08739	MLH3; DNA mismatch repair protein MLH3	ko03430	Mismatch repair
Bm005455	K08739	MLH3; DNA mismatch repair protein MLH3	ko03430	Mismatch repair
Bm005456	K08739	MLH3; DNA mismatch repair protein MLH3	ko03430	Mismatch repair
Bm005457	K08739	MLH3; DNA mismatch repair protein MLH3	ko03430	Mismatch repair
Bm005461	K08739	MLH3; DNA mismatch repair protein MLH3	ko03430	Mismatch repair
Bm005467	K02865	RP-L10Ae, RPL10A; large subunit ribosomal protein L10Ae	ko03010	Ribosome
Bm005469	K07964	HPSE; heparanase [EC:3.2.1.166]	ko00531	Glycosaminoglycan degradation
Bm005488	K02870	RP-L12e, RPL12; large subunit ribosomal protein L12e	ko03010	Ribosome
Bm005491	K03267	ERF3, GSPT; peptide chain release factor subunit 3	ko03015	mRNA surveillance pathway
Bm005494	K08873	SMG1; serine/threonine-protein kinase SMG1 [EC:2.7.11.1]	ko03015	mRNA surveillance pathway
Bm005495	K08873	SMG1; serine/threonine-protein kinase SMG1 [EC:2.7.11.1]	ko03015	mRNA surveillance pathway
Bm005501	K02894	RP-L23e, RPL23; large subunit ribosomal protein L23e	ko03010	Ribosome
Bm005513	K02903	RP-L28e, RPL28; large subunit ribosomal protein L28e	ko03010	Ribosome
Bm005519	K00737	MGAT3; beta-1,4-mannosyl-glycoprotein beta-1,4-N-acetylglucosaminyltransferase [EC:2.4.1.144]	ko04075	Plant hormone signal transduction
Bm005523	K00384	trxB, TRR; thioredoxin reductase (NADPH) [EC:1.8.1.9]	ko00450	Selenocompound metabolism
Bm005549	K15634	gpmB; 2,3-bisphosphoglycerate-dependent phosphoglycerate mutase [EC:5.4.2.11]	ko00260	Glycine, serine and threonine metabolism
Bm005566	K03254	EIF3A; translation initiation factor 3 subunit A	ko03013	Nucleocytoplasmic transport
Bm005585	K00847	E2.7.1.4, scrK; fructokinase [EC:2.7.1.4]	ko00051	Fructose and mannose metabolism
Bm005586	K01873	VARS, valS; valyl-tRNA synthetase [EC:6.1.1.9]	ko00970	Aminoacyl-tRNA biosynthesis
Bm005598	K04371	ERK, MAPK1_3; mitogen-activated protein kinase 1/3 [EC:2.7.11.24]	ko04626	Plant-pathogen interaction
Bm005608	K00566	mnmA, trmU; tRNA-uridine 2-sulfurtransferase [EC:2.8.1.13]	ko04122	Sulfur relay system
Bm005622	K02891	RP-L22e, RPL22; large subunit ribosomal protein L22e	ko03010	Ribosome
Bm005625	K12858	DDX23, PRP28; ATP-dependent RNA helicase DDX23/PRP28 [EC:3.6.4.13]	ko03040	Spliceosome
Bm005627	K03781	katE, CAT, catB, srpA; catalase [EC:1.11.1.6]	ko04146	Peroxisome
Bm005631	K00876	udk, UCK; uridine kinase [EC:2.7.1.48]	ko00240	Pyrimidine metabolism
Bm005633	K10956	SEC61A; protein transport protein SEC61 subunit alpha	ko04145	Phagosome
Bm005634	K03921	FAB2, SSI2, desA1; acyl-[acyl-carrier-protein] desaturase [EC:1.14.19.2 1.14.19.11 1.14.19.26]	ko00061	Fatty acid biosynthesis
Bm005636	K02983	RP-S30e, RPS30; small subunit ribosomal protein S30e	ko03010	Ribosome
Bm005637	K07198	PRKAA, AMPK; 5'-AMP-activated protein kinase, catalytic alpha subunit [EC:2.7.11.31]	ko04140	Autophagy - animal
Bm005661	K13448	CML; calcium-binding protein CML	ko04626	Plant-pathogen interaction
Bm005681	K12820	DHX15, PRP43; pre-mRNA-splicing factor ATP-dependent RNA helicase DHX15/PRP43 [EC:3.6.4.13]	ko03040	Spliceosome
Bm005684	K00128	ALDH; aldehyde dehydrogenase (NAD+) [EC:1.2.1.3]	ko00280	Valine, leucine and isoleucine degradation
Bm005685	K14572	MDN1, REA1; midasin	ko03008	Ribosome biogenesis in eukaryotes
Bm005690	K08342	ATG4; cysteine protease ATG4 [EC:3.4.22.-]	ko04140	Autophagy - animal
Bm005692	K03935	NDUFS2; NADH dehydrogenase (ubiquinone) Fe-S protein 2 [EC:7.1.1.2]	ko00190	Oxidative phosphorylation
Bm005693	K03935	NDUFS2; NADH dehydrogenase (ubiquinone) Fe-S protein 2 [EC:7.1.1.2]	ko00190	Oxidative phosphorylation
Bm005698	K02908	RP-L30e, RPL30; large subunit ribosomal protein L30e	ko03010	Ribosome
Bm005702	K02981	RP-S2e, RPS2; small subunit ribosomal protein S2e	ko03010	Ribosome
Bm005709	K03942	NDUFV1; NADH dehydrogenase (ubiquinone) flavoprotein 1 [EC:7.1.1.2]	ko00190	Oxidative phosphorylation
Bm005710	K03942	NDUFV1; NADH dehydrogenase (ubiquinone) flavoprotein 1 [EC:7.1.1.2]	ko00190	Oxidative phosphorylation
Bm005729	K02977	RP-S27Ae, RPS27A, UBA80; ubiquitin-small subunit ribosomal protein S27Ae	ko03010	Ribosome
Bm005740	K00236	SDHC, SDH3; succinate dehydrogenase (ubiquinone) cytochrome b560 subunit	ko00020	Citrate cycle
Bm005745	K02293	PDS, crtP; 15-cis-phytoene desaturase [EC:1.3.5.5]	ko00906	Carotenoid biosynthesis
Bm005752	K13525	VCP, CDC48; transitional endoplasmic reticulum ATPase	ko04141	Protein processing in endoplasmic reticulum
Bm005753	K13525	VCP, CDC48; transitional endoplasmic reticulum ATPase	ko04141	Protein processing in endoplasmic reticulum
Bm005754	K13525	VCP, CDC48; transitional endoplasmic reticulum ATPase	ko04141	Protein processing in endoplasmic reticulum
Bm005756	K01800	maiA, GSTZ1; maleylacetoacetate isomerase [EC:5.2.1.2]	ko00350	Tyrosine metabolism
Bm005758	K01800	maiA, GSTZ1; maleylacetoacetate isomerase [EC:5.2.1.2]	ko00350	Tyrosine metabolism
Bm005759	K01800	maiA, GSTZ1; maleylacetoacetate isomerase [EC:5.2.1.2]	ko00350	Tyrosine metabolism
Bm005768	K04079	HSP90A, htpG; molecular chaperone HtpG	ko04141	Protein processing in endoplasmic reticulum
Bm005778	K07513	ACAA1; acetyl-CoA acyltransferase 1 [EC:2.3.1.16]	ko04146	Peroxisome
Bm005779	K02949	RP-S11e, RPS11; small subunit ribosomal protein S11e	ko03010	Ribosome
Bm005793	K04706	PIAS1; E3 SUMO-protein ligase PIAS1 [EC:2.3.2.-]	ko04120	Ubiquitin mediated proteolysis
Bm005794	K14500	BSK; BR-signaling kinase [EC:2.7.11.1]	ko04075	Plant hormone signal transduction
Bm005820	K02897	RP-L25, rplY; large subunit ribosomal protein L25	ko03010	Ribosome
Bm005842	K05298	GAPA; glyceraldehyde-3-phosphate dehydrogenase (NADP+) (phosphorylating) [EC:1.2.1.13]	ko00710	Carbon fixation in photosynthetic organisms
Bm005848	K01648	ACLY; ATP citrate (pro-S)-lyase [EC:2.3.3.8]	ko00020	Citrate cycle
Bm005865	K05658	ABCB1, CD243; ATP-binding cassette, subfamily B (MDR/TAP), member 1 [EC:7.6.2.2]	ko02010	ABC transporters
Bm005869	K02154	ATPeV0A, ATP6N; V-type H+-transporting ATPase subunit a	ko04145	Phagosome
Bm005879	K03248	EIF3G; translation initiation factor 3 subunit G	ko03013	Nucleocytoplasmic transport
Bm005883	K03240	EIF2B5; translation initiation factor eIF-2B subunit epsilon	ko03013	Nucleocytoplasmic transport
Bm005885	K12849	PRPF38A; pre-mRNA-splicing factor 38A	ko03040	Spliceosome
Bm005890	K10256	FAD2; omega-6 fatty acid desaturase / acyl-lipid omega-6 desaturase (Delta-12 desaturase) [EC:1.14.19.6 1.14.19.22]	ko01040	Biosynthesis of unsaturated fatty acids
Bm005894	K03002	RPA2, POLR1B; DNA-directed RNA polymerase I subunit RPA2 [EC:2.7.7.6]	ko03020	RNA polymerase
Bm005920	K13667	POGLUT1, RUMI, KTELC1; EGF-domain serine glucosyl/xylosyltransferase [EC:2.4.1.376 2.4.2.63]	ko00510	N-Glycan biosynthesis
Bm005923	K09580	PDIA1, P4HB; protein disulfide-isomerase A1 [EC:5.3.4.1]	ko04141	Protein processing in endoplasmic reticulum
Bm005924	K09580	PDIA1, P4HB; protein disulfide-isomerase A1 [EC:5.3.4.1]	ko04141	Protein processing in endoplasmic reticulum
Bm005925	K02880	RP-L17e, RPL17; large subunit ribosomal protein L17e	ko03010	Ribosome
Bm005927	K08912	LHCB1; light-harvesting complex II chlorophyll a/b binding protein 1	ko00196	Photosynthesis - antenna proteins
Bm005929	K10257	FAD3, FAD7, FAD8, desB; acyl-lipid omega-3 desaturase [EC:1.14.19.25 1.14.19.35 1.14.19.36]	ko01040	Biosynthesis of unsaturated fatty acids
Bm005947	K01653	E2.2.1.6S, ilvH, ilvN; acetolactate synthase I/III small subunit [EC:2.2.1.6]	ko00290	Valine, leucine and isoleucine biosynthesis
Bm005952	K12129	PRR7; pseudo-response regulator 7	ko04712	Circadian rhythm - plant
Bm005962	K08660	CNDP2; cytosolic nonspecific dipeptidase [EC:3.4.13.18]	ko00330	Arginine and proline metabolism
Bm005973	K13293	PDE4; cAMP-specific phosphodiesterase 4 [EC:3.1.4.53]	ko00230	Purine metabolism
Bm005974	K00949	thiN, TPK1, THI80; thiamine pyrophosphokinase [EC:2.7.6.2]	ko00730	Thiamine metabolism
Bm005979	K02267	COX6B; cytochrome c oxidase subunit 6b	ko00190	Oxidative phosphorylation
Bm005982	K13457	RPM1, RPS3; disease resistance protein RPM1	ko04626	Plant-pathogen interaction
Bm005987	K05658	ABCB1, CD243; ATP-binding cassette, subfamily B (MDR/TAP), member 1 [EC:7.6.2.2]	ko02010	ABC transporters
Bm005992	K14307	NUPL1, NUP49; nucleoporin p58/p45	ko03013	Nucleocytoplasmic transport
Bm005993	K14307	NUPL1, NUP49; nucleoporin p58/p45	ko03013	Nucleocytoplasmic transport
Bm006000	K00800	aroA; 3-phosphoshikimate 1-carboxyvinyltransferase [EC:2.5.1.19]	ko00400	Phenylalanine, tyrosine and tryptophan biosynthesis
Bm006001	K03348	APC1, ANAPC1; anaphase-promoting complex subunit 1	ko04120	Ubiquitin mediated proteolysis
Bm006006	K14500	BSK; BR-signaling kinase [EC:2.7.11.1]	ko04075	Plant hormone signal transduction
Bm006008	K05643	ABCA3; ATP-binding cassette, subfamily A (ABC1), member 3	ko02010	ABC transporters
Bm006019	K14416	HBS1; elongation factor 1 alpha-like protein	ko03015	mRNA surveillance pathway
Bm006026	K12355	REF1; coniferyl-aldehyde dehydrogenase [EC:1.2.1.68]	ko00940	Phenylpropanoid biosynthesis
Bm006033	K11131	DKC1, NOLA4, CBF5; H/ACA ribonucleoprotein complex subunit 4 [EC:5.4.99.-]	ko03008	Ribosome biogenesis in eukaryotes
Bm006034	K00703	glgA; starch synthase [EC:2.4.1.21]	ko00500	Starch and sucrose metabolism
Bm006035	K00507	SCD, desC; stearoyl-CoA desaturase (Delta-9 desaturase) [EC:1.14.19.1]	ko01040	Biosynthesis of unsaturated fatty acids
Bm006050	K02433	gatA, QRSL1; aspartyl-tRNA(Asn)/glutamyl-tRNA(Gln) amidotransferase subunit A [EC:6.3.5.6 6.3.5.7]	ko00970	Aminoacyl-tRNA biosynthesis
Bm006056	K01689	ENO, eno; enolase [EC:4.2.1.11]	ko03018	RNA degradation
Bm006065	K03267	ERF3, GSPT; peptide chain release factor subunit 3	ko03015	mRNA surveillance pathway
Bm006069	K00140	mmsA, iolA, ALDH6A1; malonate-semialdehyde dehydrogenase (acetylating) / methylmalonate-semialdehyde dehydrogenase [EC:1.2.1.18 1.2.1.27]	ko00280	Valine, leucine and isoleucine degradation
Bm006071	K01177	E3.2.1.2; beta-amylase [EC:3.2.1.2]	ko00500	Starch and sucrose metabolism
Bm006072	K01177	E3.2.1.2; beta-amylase [EC:3.2.1.2]	ko00500	Starch and sucrose metabolism
Bm006076	K01177	E3.2.1.2; beta-amylase [EC:3.2.1.2]	ko00500	Starch and sucrose metabolism
Bm006077	K02942	RP-LP1, RPLP1; large subunit ribosomal protein LP1	ko03010	Ribosome
Bm006079	K02258	COX11, ctaG; cytochrome c oxidase assembly protein subunit 11	ko00190	Oxidative phosphorylation
Bm006080	K02641	petH; ferredoxin--NADP+ reductase [EC:1.18.1.2]	ko00195	Photosynthesis
Bm006083	K02377	TSTA3, fcl; GDP-L-fucose synthase [EC:1.1.1.271]	ko00051	Fructose and mannose metabolism
Bm006091	K01904	4CL; 4-coumarate--CoA ligase [EC:6.2.1.12]	ko00360	Phenylalanine metabolism
Bm006094	K12626	LSM7; U6 snRNA-associated Sm-like protein LSm7	ko03018	RNA degradation
Bm006099	K08504	BET1; blocked early in transport 1	ko04130	SNARE interactions in vesicular transport
Bm006122	K14496	PYL; abscisic acid receptor PYR/PYL family	ko04075	Plant hormone signal transduction
Bm006125	K02900	RP-L27Ae, RPL27A; large subunit ribosomal protein L27Ae	ko03010	Ribosome
Bm006129	K05933	E1.14.17.4; aminocyclopropanecarboxylate oxidase [EC:1.14.17.4]	ko00270	Cysteine and methionine metabolism
Bm006130	K01689	ENO, eno; enolase [EC:4.2.1.11]	ko03018	RNA degradation
Bm006134	K02262	COX3; cytochrome c oxidase subunit 3	ko00190	Oxidative phosphorylation
Bm006139	K02942	RP-LP1, RPLP1; large subunit ribosomal protein LP1	ko03010	Ribosome
Bm006157	K13347	PXMP2, PMP22; peroxisomal membrane protein 2	ko04146	Peroxisome
Bm006174	K00121	frmA, ADH5, adhC; S-(hydroxymethyl)glutathione dehydrogenase / alcohol dehydrogenase [EC:1.1.1.284 1.1.1.1]	ko00350	Tyrosine metabolism
Bm006201	K10085	EDEM2; ER degradation enhancer, mannosidase alpha-like 2	ko04141	Protein processing in endoplasmic reticulum
Bm006204	K12824	TCERG1, CA150; transcription elongation regulator 1	ko03040	Spliceosome
Bm006209	K03809	wrbA; NAD(P)H dehydrogenase (quinone) [EC:1.6.5.2]	ko00130	Ubiquinone and other terpenoid-quinone biosynthesis
Bm006238	K09648	IMP2; mitochondrial inner membrane protease subunit 2 [EC:3.4.21.-]	ko03060	Protein export
Bm006239	K09648	IMP2; mitochondrial inner membrane protease subunit 2 [EC:3.4.21.-]	ko03060	Protein export
Bm006246	K04079	HSP90A, htpG; molecular chaperone HtpG	ko04141	Protein processing in endoplasmic reticulum
Bm006248	K04079	HSP90A, htpG; molecular chaperone HtpG	ko04141	Protein processing in endoplasmic reticulum
Bm006253	K02726	PSMA2; 20S proteasome subunit alpha 2 [EC:3.4.25.1]	ko03050	Proteasome
Bm006260	K00261	GLUD1_2, gdhA; glutamate dehydrogenase (NAD(P)+) [EC:1.4.1.3]	ko00220	Arginine biosynthesis
Bm006265	K00134	GAPDH, gapA; glyceraldehyde 3-phosphate dehydrogenase (phosphorylating) [EC:1.2.1.12]	ko00010	Glycolysis / Gluconeogenesis
Bm006275	K11583	PPP2R3; serine/threonine-protein phosphatase 2A regulatory subunit B''	ko03015	mRNA surveillance pathway
Bm006293	K02962	RP-S17e, RPS17; small subunit ribosomal protein S17e	ko03010	Ribosome
Bm006307	K00850	pfkA, PFK; 6-phosphofructokinase 1 [EC:2.7.1.11]	ko03018	RNA degradation
Bm006308	K00850	pfkA, PFK; 6-phosphofructokinase 1 [EC:2.7.1.11]	ko03018	RNA degradation
Bm006319	K06943	NOG1; nucleolar GTP-binding protein	ko03008	Ribosome biogenesis in eukaryotes
Bm006327	K13425	WRKY22; WRKY transcription factor 22	ko04626	Plant-pathogen interaction
Bm006332	K09834	VTE1, SXD1; tocopherol cyclase [EC:5.5.1.24]	ko00130	Ubiquinone and other terpenoid-quinone biosynthesis
Bm006336	K03131	TAF6; transcription initiation factor TFIID subunit 6	ko03022	Basal transcription factors
Bm006337	K03131	TAF6; transcription initiation factor TFIID subunit 6	ko03022	Basal transcription factors
Bm006341	K06943	NOG1; nucleolar GTP-binding protein	ko03008	Ribosome biogenesis in eukaryotes
Bm006342	K01103	PFKFB3; 6-phosphofructo-2-kinase / fructose-2,6-biphosphatase 3 [EC:2.7.1.105 3.1.3.46]	ko00051	Fructose and mannose metabolism
Bm006362	K00134	GAPDH, gapA; glyceraldehyde 3-phosphate dehydrogenase (phosphorylating) [EC:1.2.1.12]	ko00010	Glycolysis / Gluconeogenesis
Bm006367	K01115	PLD1_2; phospholipase D1/2 [EC:3.1.4.4]	ko04144	Endocytosis
Bm006369	K00134	GAPDH, gapA; glyceraldehyde 3-phosphate dehydrogenase (phosphorylating) [EC:1.2.1.12]	ko00010	Glycolysis / Gluconeogenesis
Bm006370	K00134	GAPDH, gapA; glyceraldehyde 3-phosphate dehydrogenase (phosphorylating) [EC:1.2.1.12]	ko00010	Glycolysis / Gluconeogenesis
Bm006371	K00134	GAPDH, gapA; glyceraldehyde 3-phosphate dehydrogenase (phosphorylating) [EC:1.2.1.12]	ko00010	Glycolysis / Gluconeogenesis
Bm006372	K00134	GAPDH, gapA; glyceraldehyde 3-phosphate dehydrogenase (phosphorylating) [EC:1.2.1.12]	ko00010	Glycolysis / Gluconeogenesis
Bm006377	K12837	U2AF2; splicing factor U2AF 65 kDa subunit	ko03040	Spliceosome
Bm006378	K02133	ATPeF1B, ATP5B, ATP2; F-type H+-transporting ATPase subunit beta [EC:7.1.2.2]	ko00190	Oxidative phosphorylation
Bm006380	K02144	ATPeV1H; V-type H+-transporting ATPase subunit H	ko04145	Phagosome
Bm006388	K04079	HSP90A, htpG; molecular chaperone HtpG	ko04141	Protein processing in endoplasmic reticulum
Bm006401	K01937	pyrG, CTPS; CTP synthase [EC:6.3.4.2]	ko00240	Pyrimidine metabolism
Bm006402	K03936	NDUFS3; NADH dehydrogenase (ubiquinone) Fe-S protein 3 [EC:7.1.1.2]	ko00190	Oxidative phosphorylation
Bm006407	K02891	RP-L22e, RPL22; large subunit ribosomal protein L22e	ko03010	Ribosome
Bm006412	K12741	HNRNPA1_3; heterogeneous nuclear ribonucleoprotein A1/A3	ko03040	Spliceosome
Bm006421	K05546	GANAB; mannosyl-oligosaccharide alpha-1,3-glucosidase [EC:3.2.1.207]	ko04141	Protein processing in endoplasmic reticulum
Bm006423	K14500	BSK; BR-signaling kinase [EC:2.7.11.1]	ko04075	Plant hormone signal transduction
Bm006443	K13421	UMPS; uridine monophosphate synthetase [EC:2.4.2.10 4.1.1.23]	ko00240	Pyrimidine metabolism
Bm006446	K13421	UMPS; uridine monophosphate synthetase [EC:2.4.2.10 4.1.1.23]	ko00240	Pyrimidine metabolism
Bm006453	K13447	RBOH; respiratory burst oxidase [EC:1.6.3.- 1.11.1.-]	ko04626	Plant-pathogen interaction
Bm006469	K14537	NUG2, GNL2; nuclear GTP-binding protein	ko03008	Ribosome biogenesis in eukaryotes
Bm006472	K11130	NOP10, NOLA3; H/ACA ribonucleoprotein complex subunit 3	ko03008	Ribosome biogenesis in eukaryotes
Bm006484	K03013	RPABC1, RPB5, POLR2E; DNA-directed RNA polymerases I, II, and III subunit RPABC1	ko03020	RNA polymerase
Bm006490	K14424	SMO2; plant 4alpha-monomethylsterol monooxygenase [EC:1.14.18.11]	ko00100	Steroid biosynthesis
Bm006495	K13993	HSP20; HSP20 family protein	ko04141	Protein processing in endoplasmic reticulum
Bm006509	K01679	E4.2.1.2B, fumC, FH; fumarate hydratase, class II [EC:4.2.1.2]	ko00020	Citrate cycle
Bm006516	K13993	HSP20; HSP20 family protein	ko04141	Protein processing in endoplasmic reticulum
Bm006534	K14397	NUDT21, CPSF5, CFIM25; cleavage and polyadenylation specificity factor subunit 5	ko03015	mRNA surveillance pathway
Bm006551	K03237	EIF2S1; translation initiation factor 2 subunit 1	ko04141	Protein processing in endoplasmic reticulum
Bm006554	K01875	SARS, serS; seryl-tRNA synthetase [EC:6.1.1.11]	ko00970	Aminoacyl-tRNA biosynthesis
Bm006556	K00921	PIKFYVE, FAB1; 1-phosphatidylinositol-3-phosphate 5-kinase [EC:2.7.1.150]	ko04145	Phagosome
Bm006557	K02976	RP-S26e, RPS26; small subunit ribosomal protein S26e	ko03010	Ribosome
Bm006560	K12586	RRP43, EXOSC8, OIP2; exosome complex component RRP43	ko03018	RNA degradation
Bm006565	K05643	ABCA3; ATP-binding cassette, subfamily A (ABC1), member 3	ko02010	ABC transporters
Bm006566	K00412	CYTB, petB; ubiquinol-cytochrome c reductase cytochrome b subunit	ko00190	Oxidative phosphorylation
Bm006582	K02953	RP-S13e, RPS13; small subunit ribosomal protein S13e	ko03010	Ribosome
Bm006612	K02903	RP-L28e, RPL28; large subunit ribosomal protein L28e	ko03010	Ribosome
Bm006613	K00820	glmS, GFPT; glutamine---fructose-6-phosphate transaminase (isomerizing) [EC:2.6.1.16]	ko00250	Alanine, aspartate and glutamate metabolism
Bm006615	K00895	pfp, PFP; diphosphate-dependent phosphofructokinase [EC:2.7.1.90]	ko00051	Fructose and mannose metabolism
Bm006626	K02980	RP-S29e, RPS29; small subunit ribosomal protein S29e	ko03010	Ribosome
Bm006658	K03347	CUL1, CDC53; cullin 1	ko04120	Ubiquitin mediated proteolysis
Bm006667	K09540	SEC63, DNAJC23; translocation protein SEC63	ko03060	Protein export
Bm006674	K11778	DHDDS, RER2, SRT1; ditrans,polycis-polyprenyl diphosphate synthase [EC:2.5.1.87]	ko00900	Terpenoid backbone biosynthesis
Bm006679	K14574	SDO1, SBDS; ribosome maturation protein SDO1	ko03008	Ribosome biogenesis in eukaryotes
Bm006694	K01490	AMPD; AMP deaminase [EC:3.5.4.6]	ko00230	Purine metabolism
Bm006709	K03019	RPC11, POLR3K; DNA-directed RNA polymerase III subunit RPC11	ko03020	RNA polymerase
Bm006717	K00815	TAT; tyrosine aminotransferase [EC:2.6.1.5]	ko00270	Cysteine and methionine metabolism
Bm006718	K07375	TUBB; tubulin beta	ko04145	Phagosome
Bm006723	K12862	PLRG1, PRL1, PRP46; pleiotropic regulator 1	ko03040	Spliceosome
Bm006734	K01535	PMA1, PMA2; H+-transporting ATPase [EC:7.1.2.1]	ko00190	Oxidative phosphorylation
Bm006754	K00088	IMPDH, guaB; IMP dehydrogenase [EC:1.1.1.205]	ko00230	Purine metabolism
Bm006757	K10755	RFC2_4; replication factor C subunit 2/4	ko03030	DNA replication
Bm006760	K03257	EIF4A; translation initiation factor 4A	ko03013	Nucleocytoplasmic transport
Bm006773	K00942	gmk, GUK1; guanylate kinase [EC:2.7.4.8]	ko00230	Purine metabolism
Bm006776	K01892	HARS, hisS; histidyl-tRNA synthetase [EC:6.1.1.21]	ko00970	Aminoacyl-tRNA biosynthesis
Bm006795	K03363	CDC20; cell division cycle 20, cofactor of APC complex	ko04120	Ubiquitin mediated proteolysis
Bm006804	K11584	PPP2R5; serine/threonine-protein phosphatase 2A regulatory subunit B'	ko03015	mRNA surveillance pathway
Bm006805	K00939	adk, AK; adenylate kinase [EC:2.7.4.3]	ko00230	Purine metabolism
Bm006806	K00939	adk, AK; adenylate kinase [EC:2.7.4.3]	ko00230	Purine metabolism
Bm006807	K13457	RPM1, RPS3; disease resistance protein RPM1	ko04626	Plant-pathogen interaction
Bm006816	K07936	RAN; GTP-binding nuclear protein Ran	ko03008	Ribosome biogenesis in eukaryotes
Bm006819	K02872	RP-L13Ae, RPL13A; large subunit ribosomal protein L13Ae	ko03010	Ribosome
Bm006831	K00106	XDH; xanthine dehydrogenase/oxidase [EC:1.17.1.4 1.17.3.2]	ko04146	Peroxisome
Bm006835	K02685	PRI2; DNA primase large subunit	ko03030	DNA replication
Bm006836	K02945	RP-S1, rpsA; small subunit ribosomal protein S1	ko03010	Ribosome
Bm006845	K09591	DET2; steroid 5-alpha-reductase [EC:1.3.1.22]	ko00905	Brassinosteroid biosynthesis
Bm006857	K07904	RAB11A; Ras-related protein Rab-11A	ko04144	Endocytosis
Bm006859	K01528	DNM1_3; dynamin 1/3 [EC:3.6.5.5]	ko04144	Endocytosis
Bm006871	K01079	serB, PSPH; phosphoserine phosphatase [EC:3.1.3.3]	ko00260	Glycine, serine and threonine metabolism
Bm006872	K02492	hemA; glutamyl-tRNA reductase [EC:1.2.1.70]	ko00860	Porphyrin metabolism
Bm006887	K12885	RBMX, HNRNPG; heterogeneous nuclear ribonucleoprotein G	ko03040	Spliceosome
Bm006888	K13379	RGP, UTM; reversibly glycosylated polypeptide / UDP-arabinopyranose mutase [EC:2.4.1.- 5.4.99.30]	ko00520	Amino sugar and nucleotide sugar metabolism
Bm006890	K00919	ispE; 4-diphosphocytidyl-2-C-methyl-D-erythritol kinase [EC:2.7.1.148]	ko00900	Terpenoid backbone biosynthesis
Bm006907	K08495	GOSR1, GOS1; golgi SNAP receptor complex member 1	ko04130	SNARE interactions in vesicular transport
Bm006924	K13425	WRKY22; WRKY transcription factor 22	ko04626	Plant-pathogen interaction
Bm006939	K01872	AARS, alaS; alanyl-tRNA synthetase [EC:6.1.1.7]	ko00970	Aminoacyl-tRNA biosynthesis
Bm006950	K02160	accB, bccP; acetyl-CoA carboxylase biotin carboxyl carrier protein	ko00620	Pyruvate metabolism
Bm006964	K00133	asd; aspartate-semialdehyde dehydrogenase [EC:1.2.1.11]	ko00260	Glycine, serine and threonine metabolism
Bm006965	K00133	asd; aspartate-semialdehyde dehydrogenase [EC:1.2.1.11]	ko00260	Glycine, serine and threonine metabolism
Bm006967	K12849	PRPF38A; pre-mRNA-splicing factor 38A	ko03040	Spliceosome
Bm006969	K12849	PRPF38A; pre-mRNA-splicing factor 38A	ko03040	Spliceosome
Bm006975	K02183	CALM; calmodulin	ko04070	Phosphatidylinositol signaling system
Bm006984	K01609	trpC; indole-3-glycerol phosphate synthase [EC:4.1.1.48]	ko00400	Phenylalanine, tyrosine and tryptophan biosynthesis
Bm006993	K02946	RP-S10, MRPS10, rpsJ; small subunit ribosomal protein S10	ko03010	Ribosome
Bm006997	K11128	GAR1, NOLA1; H/ACA ribonucleoprotein complex subunit 1	ko03008	Ribosome biogenesis in eukaryotes
Bm007003	K13065	E2.3.1.133, HCT; shikimate O-hydroxycinnamoyltransferase [EC:2.3.1.133]	ko00940	Phenylpropanoid biosynthesis
Bm007009	K12619	XRN2, RAT1; 5'-3' exoribonuclease 2 [EC:3.1.13.-]	ko03018	RNA degradation
Bm007012	K02871	RP-L13, MRPL13, rplM; large subunit ribosomal protein L13	ko03010	Ribosome
Bm007020	K19269	PGP, PGLP; phosphoglycolate phosphatase [EC:3.1.3.18 3.1.3.48]	ko00630	Glyoxylate and dicarboxylate metabolism
Bm007021	K00228	CPOX, hemF; coproporphyrinogen III oxidase [EC:1.3.3.3]	ko00860	Porphyrin metabolism
Bm007023	K00006	GPD1; glycerol-3-phosphate dehydrogenase (NAD+) [EC:1.1.1.8]	ko00564	Glycerophospholipid metabolism
Bm007027	K02978	RP-S27e, RPS27; small subunit ribosomal protein S27e	ko03010	Ribosome
Bm007032	K13412	CPK; calcium-dependent protein kinase [EC:2.7.11.1]	ko04626	Plant-pathogen interaction
Bm007038	K14564	NOP56; nucleolar protein 56	ko03008	Ribosome biogenesis in eukaryotes
Bm007039	K01681	ACO, acnA; aconitate hydratase [EC:4.2.1.3]	ko00020	Citrate cycle
Bm007044	K01637	E4.1.3.1, aceA; isocitrate lyase [EC:4.1.3.1]	ko00630	Glyoxylate and dicarboxylate metabolism
Bm007053	K01939	purA, ADSS; adenylosuccinate synthase [EC:6.3.4.4]	ko00250	Alanine, aspartate and glutamate metabolism
Bm007054	K03252	EIF3C; translation initiation factor 3 subunit C	ko03013	Nucleocytoplasmic transport
Bm007058	K13342	PEX5, PXR1; peroxin-5	ko04146	Peroxisome
Bm007107	K03858	PIGH, GPI15; phosphatidylinositol N-acetylglucosaminyltransferase subunit H	ko00563	Glycosylphosphatidylinositol
Bm007108	K03858	PIGH, GPI15; phosphatidylinositol N-acetylglucosaminyltransferase subunit H	ko00563	Glycosylphosphatidylinositol
Bm007113	K02955	RP-S14e, RPS14; small subunit ribosomal protein S14e	ko03010	Ribosome
Bm007131	K00549	metE; 5-methyltetrahydropteroyltriglutamate--homocysteine methyltransferase [EC:2.1.1.14]	ko00270	Cysteine and methionine metabolism
Bm007143	K01663	HIS7; imidazole glycerol-phosphate synthase [EC:4.3.2.10]	ko00340	Histidine metabolism
Bm007150	K14552	NAN1, UTP17, WDR75; NET1-associated nuclear protein 1 (U3 small nucleolar RNA-associated protein 17)	ko03008	Ribosome biogenesis in eukaryotes
Bm007158	K14299	SEH1; nucleoporin SEH1	ko03013	Nucleocytoplasmic transport
Bm007159	K14299	SEH1; nucleoporin SEH1	ko03013	Nucleocytoplasmic transport
Bm007165	K12592	C1D, LRP1; exosome complex protein LRP1	ko03018	RNA degradation
Bm007175	K10144	RCHY1, PIRH2; RING finger and CHY zinc finger domain-containing protein 1 [EC:2.3.2.27]	ko04120	Ubiquitin mediated proteolysis
Bm007177	K00799	GST, gst; glutathione S-transferase [EC:2.5.1.18]	ko00480	Glutathione metabolism
Bm007178	K10712	ADO; cysteamine dioxygenase [EC:1.13.11.19]	ko00430	Taurine and hypotaurine metabolism
Bm007179	K01535	PMA1, PMA2; H+-transporting ATPase [EC:7.1.2.1]	ko00190	Oxidative phosphorylation
Bm007184	K02905	RP-L29e, RPL29; large subunit ribosomal protein L29e	ko03010	Ribosome
Bm007216	K13338	PEX1; peroxin-1	ko04146	Peroxisome
Bm007220	K12834	PHF5A; PHD finger-like domain-containing protein 5A	ko03040	Spliceosome
Bm007235	K02884	RP-L19, MRPL19, rplS; large subunit ribosomal protein L19	ko03010	Ribosome
Bm007243	K00279	CKX; cytokinin dehydrogenase [EC:1.5.99.12]	ko00908	Zeatin biosynthesis
Bm007244	K00279	CKX; cytokinin dehydrogenase [EC:1.5.99.12]	ko00908	Zeatin biosynthesis
Bm007245	K00279	CKX; cytokinin dehydrogenase [EC:1.5.99.12]	ko00908	Zeatin biosynthesis
Bm007248	K01823	idi, IDI; isopentenyl-diphosphate Delta-isomerase [EC:5.3.3.2]	ko00900	Terpenoid backbone biosynthesis
Bm007258	K11420	EHMT; [histone H3]-lysine9 N-trimethyltransferase EHMT [EC:2.1.1.355]	ko00310	Lysine degradation
Bm007272	K02966	RP-S19e, RPS19; small subunit ribosomal protein S19e	ko03010	Ribosome
Bm007283	K02155	ATPeV0C, ATP6L; V-type H+-transporting ATPase 16kDa proteolipid subunit	ko04145	Phagosome
Bm007290	K00164	OGDH, sucA; 2-oxoglutarate dehydrogenase E1 component [EC:1.2.4.2]	ko00310	Lysine degradation
Bm007295	K03868	RBX1, ROC1; E3 ubiquitin-protein ligase RBX1 [EC:2.3.2.32]	ko04120	Ubiquitin mediated proteolysis
Bm007296	K03260	EIF4G; translation initiation factor 4G	ko03013	Nucleocytoplasmic transport
Bm007301	K00281	GLDC, gcvP; glycine cleavage system P protein (glycine dehydrogenase) [EC:1.4.4.2]	ko00260	Glycine, serine and threonine metabolism
Bm007306	K01681	ACO, acnA; aconitate hydratase [EC:4.2.1.3]	ko00020	Citrate cycle
Bm007319	K10688	UBE2W, UBC16; ubiquitin-conjugating enzyme E2 W [EC:2.3.2.25]	ko04120	Ubiquitin mediated proteolysis
Bm007327	K00008	SORD, gutB; L-iditol 2-dehydrogenase [EC:1.1.1.14]	ko00040	Pentose and glucuronate interconversions
Bm007333	K00008	SORD, gutB; L-iditol 2-dehydrogenase [EC:1.1.1.14]	ko00040	Pentose and glucuronate interconversions
Bm007336	K00565	RNMT; mRNA (guanine-N7-)-methyltransferase [EC:2.1.1.56]	ko03015	mRNA surveillance pathway
Bm007340	K13457	RPM1, RPS3; disease resistance protein RPM1	ko04626	Plant-pathogen interaction
Bm007341	K13457	RPM1, RPS3; disease resistance protein RPM1	ko04626	Plant-pathogen interaction
Bm007342	K13457	RPM1, RPS3; disease resistance protein RPM1	ko04626	Plant-pathogen interaction
Bm007349	K00036	G6PD, zwf; glucose-6-phosphate 1-dehydrogenase [EC:1.1.1.49 1.1.1.363]	ko00030	Pentose phosphate pathway
Bm007354	K03242	EIF2S3; translation initiation factor 2 subunit 3	ko03013	Nucleocytoplasmic transport
Bm007356	K04079	HSP90A, htpG; molecular chaperone HtpG	ko04141	Protein processing in endoplasmic reticulum
Bm007358	K07253	MIF; phenylpyruvate tautomerase [EC:5.3.2.1]	ko00350	Tyrosine metabolism
Bm007361	K03252	EIF3C; translation initiation factor 3 subunit C	ko03013	Nucleocytoplasmic transport
Bm007363	K03008	RPB11, POLR2J; DNA-directed RNA polymerase II subunit RPB11	ko03020	RNA polymerase
Bm007365	K14552	NAN1, UTP17, WDR75; NET1-associated nuclear protein 1 (U3 small nucleolar RNA-associated protein 17)	ko03008	Ribosome biogenesis in eukaryotes
Bm007366	K01835	pgm; phosphoglucomutase [EC:5.4.2.2]	ko00010	Glycolysis / Gluconeogenesis
Bm007373	K05658	ABCB1, CD243; ATP-binding cassette, subfamily B (MDR/TAP), member 1 [EC:7.6.2.2]	ko02010	ABC transporters
Bm007375	K00457	HPD, hppD; 4-hydroxyphenylpyruvate dioxygenase [EC:1.13.11.27]	ko00350	Tyrosine metabolism
Bm007387	K01514	PRUNE, PPX1; exopolyphosphatase [EC:3.6.1.11]	ko00230	Purine metabolism
Bm007389	K12598	MTR4, SKIV2L2; ATP-dependent RNA helicase DOB1 [EC:3.6.4.13]	ko03018	RNA degradation
Bm007408	K00816	CCBL; kynurenine---oxoglutarate transaminase / cysteine-S-conjugate beta-lyase / glutamine---phenylpyruvate transaminase [EC:2.6.1.7 4.4.1.13 2.6.1.64]	ko00380	Tryptophan metabolism
Bm007430	K01259	pip; proline iminopeptidase [EC:3.4.11.5]	ko00330	Arginine and proline metabolism
Bm007445	K10589	UBE3C; ubiquitin-protein ligase E3 C [EC:2.3.2.26]	ko04120	Ubiquitin mediated proteolysis
Bm007446	K10589	UBE3C; ubiquitin-protein ligase E3 C [EC:2.3.2.26]	ko04120	Ubiquitin mediated proteolysis
Bm007449	K10589	UBE3C; ubiquitin-protein ligase E3 C [EC:2.3.2.26]	ko04120	Ubiquitin mediated proteolysis
Bm007452	K03021	RPC2, POLR3B; DNA-directed RNA polymerase III subunit RPC2 [EC:2.7.7.6]	ko03020	RNA polymerase
Bm007454	K10589	UBE3C; ubiquitin-protein ligase E3 C [EC:2.3.2.26]	ko04120	Ubiquitin mediated proteolysis
Bm007456	K10589	UBE3C; ubiquitin-protein ligase E3 C [EC:2.3.2.26]	ko04120	Ubiquitin mediated proteolysis
Bm007457	K00059	fabG, OAR1; 3-oxoacyl-[acyl-carrier protein] reductase [EC:1.1.1.100]	ko00061	Fatty acid biosynthesis
Bm007461	K14326	UPF1, RENT1; regulator of nonsense transcripts 1 [EC:3.6.4.13 5.6.2.3]	ko03013	Nucleocytoplasmic transport
Bm007464	K11599	POMP, UMP1; proteasome maturation protein	ko03050	Proteasome
Bm007470	K07897	RAB7A; Ras-related protein Rab-7A	ko04144	Endocytosis
Bm007471	K07897	RAB7A; Ras-related protein Rab-7A	ko04144	Endocytosis
Bm007483	K00999	CDIPT; CDP-diacylglycerol--inositol 3-phosphatidyltransferase [EC:2.7.8.11]	ko04070	Phosphatidylinositol signaling system
Bm007486	K15919	HPR2_3; glyoxylate/hydroxypyruvate reductase [EC:1.1.1.79 1.1.1.81]	ko00260	Glycine, serine and threonine metabolism
Bm007488	K00999	CDIPT; CDP-diacylglycerol--inositol 3-phosphatidyltransferase [EC:2.7.8.11]	ko04070	Phosphatidylinositol signaling system
Bm007489	K00999	CDIPT; CDP-diacylglycerol--inositol 3-phosphatidyltransferase [EC:2.7.8.11]	ko04070	Phosphatidylinositol signaling system
Bm007498	K10845	TTDA, GTF2H5, TFB5; TFIIH basal transcription factor complex TTD-A subunit	ko03420	Nucleotide excision repair
Bm007507	K00549	metE; 5-methyltetrahydropteroyltriglutamate--homocysteine methyltransferase [EC:2.1.1.14]	ko00270	Cysteine and methionine metabolism
Bm007514	K00966	GMPP; mannose-1-phosphate guanylyltransferase [EC:2.7.7.13]	ko00051	Fructose and mannose metabolism
Bm007520	K02874	RP-L14, MRPL14, rplN; large subunit ribosomal protein L14	ko03010	Ribosome
Bm007533	K12819	SLU7; pre-mRNA-processing factor SLU7	ko03040	Spliceosome
Bm007538	K00627	DLAT, aceF, pdhC; pyruvate dehydrogenase E2 component (dihydrolipoyllysine-residue acetyltransferase) [EC:2.3.1.12]	ko00010	Glycolysis / Gluconeogenesis
Bm007539	K00261	GLUD1_2, gdhA; glutamate dehydrogenase (NAD(P)+) [EC:1.4.1.3]	ko00220	Arginine biosynthesis
Bm007540	K00261	GLUD1_2, gdhA; glutamate dehydrogenase (NAD(P)+) [EC:1.4.1.3]	ko00220	Arginine biosynthesis
Bm007586	K09588	CYP90A1, CPD; 3beta,22alpha-dihydroxysteroid 3-dehydrogenase [EC:1.14.19.79]	ko00905	Brassinosteroid biosynthesis
Bm007596	K03237	EIF2S1; translation initiation factor 2 subunit 1	ko04141	Protein processing in endoplasmic reticulum
Bm007603	K05917	CYP51; sterol 14alpha-demethylase [EC:1.14.14.154 1.14.15.36]	ko00100	Steroid biosynthesis
Bm007604	K10685	UBLE1B, SAE2, UBA2; ubiquitin-like 1-activating enzyme E1 B [EC:6.2.1.45]	ko04120	Ubiquitin mediated proteolysis
Bm007609	K01647	CS, gltA; citrate synthase [EC:2.3.3.1]	ko00020	Citrate cycle
Bm007615	K00413	CYC1, CYT1, petC; ubiquinol-cytochrome c reductase cytochrome c1 subunit	ko00190	Oxidative phosphorylation
Bm007626	K14297	NUP98, ADAR2, NUP116; nuclear pore complex protein Nup98-Nup96	ko03013	Nucleocytoplasmic transport
Bm007630	K12823	DDX5, DBP2; ATP-dependent RNA helicase DDX5/DBP2 [EC:3.6.4.13]	ko03040	Spliceosome
Bm007649	K12818	DHX8, PRP22; ATP-dependent RNA helicase DHX8/PRP22 [EC:3.6.4.13]	ko03040	Spliceosome
Bm007650	K02183	CALM; calmodulin	ko04070	Phosphatidylinositol signaling system
Bm007658	K00434	E1.11.1.11; L-ascorbate peroxidase [EC:1.11.1.11]	ko00053	Ascorbate and aldarate metabolism
Bm007659	K00434	E1.11.1.11; L-ascorbate peroxidase [EC:1.11.1.11]	ko00053	Ascorbate and aldarate metabolism
Bm007662	K04392	RAC1; Ras-related C3 botulinum toxin substrate 1	ko04145	Phagosome
Bm007668	K01183	E3.2.1.14; chitinase [EC:3.2.1.14]	ko00520	Amino sugar and nucleotide sugar metabolism
Bm007692	K08081	TR1; tropinone reductase I [EC:1.1.1.206]	ko00960	Tropane, piperidine and pyridine alkaloid biosynthesis
Bm007695	K08081	TR1; tropinone reductase I [EC:1.1.1.206]	ko00960	Tropane, piperidine and pyridine alkaloid biosynthesis
Bm007700	K01951	guaA, GMPS; GMP synthase (glutamine-hydrolysing) [EC:6.3.5.2]	ko00230	Purine metabolism
Bm007702	K10882	EME1, MMS4; crossover junction endonuclease EME1 [EC:3.1.22.-]	ko03440	Homologous recombination
Bm007704	K01938	fhs; formate--tetrahydrofolate ligase [EC:6.3.4.3]	ko00670	One carbon pool by folate
Bm007706	K12833	SF3B14; pre-mRNA branch site protein p14	ko03040	Spliceosome
Bm007720	K10756	RFC3_5; replication factor C subunit 3/5	ko03030	DNA replication
Bm007734	K14498	SNRK2; serine/threonine-protein kinase SRK2 [EC:2.7.11.1]	ko04075	Plant hormone signal transduction
Bm007736	K11099	SNRPG, SMG; small nuclear ribonucleoprotein G	ko03040	Spliceosome
Bm007741	K15918	GLYK; D-glycerate 3-kinase [EC:2.7.1.31]	ko00260	Glycine, serine and threonine metabolism
Bm007747	K14498	SNRK2; serine/threonine-protein kinase SRK2 [EC:2.7.11.1]	ko04075	Plant hormone signal transduction
Bm007750	K01923	purC; phosphoribosylaminoimidazole-succinocarboxamide synthase [EC:6.3.2.6]	ko00230	Purine metabolism
Bm007753	K02291	crtB; 15-cis-phytoene synthase [EC:2.5.1.32]	ko00906	Carotenoid biosynthesis
Bm007755	K02865	RP-L10Ae, RPL10A; large subunit ribosomal protein L10Ae	ko03010	Ribosome
Bm007764	K11420	EHMT; [histone H3]-lysine9 N-trimethyltransferase EHMT [EC:2.1.1.355]	ko00310	Lysine degradation
Bm007770	K01923	purC; phosphoribosylaminoimidazole-succinocarboxamide synthase [EC:6.3.2.6]	ko00230	Purine metabolism
Bm007773	K02937	RP-L7e, RPL7; large subunit ribosomal protein L7e	ko03010	Ribosome
Bm007792	K01568	PDC, pdc; pyruvate decarboxylase [EC:4.1.1.1]	ko00010	Glycolysis / Gluconeogenesis
Bm007795	K01568	PDC, pdc; pyruvate decarboxylase [EC:4.1.1.1]	ko00010	Glycolysis / Gluconeogenesis
Bm007800	K03032	PSMD1, RPN2; 26S proteasome regulatory subunit N2	ko03050	Proteasome
Bm007801	K01870	IARS, ileS; isoleucyl-tRNA synthetase [EC:6.1.1.5]	ko00970	Aminoacyl-tRNA biosynthesis
Bm007807	K02875	RP-L14e, RPL14; large subunit ribosomal protein L14e	ko03010	Ribosome
Bm007810	K19054	FXN; frataxin [EC:1.16.3.1]	ko00860	Porphyrin metabolism
Bm007812	K14492	ARR-A; two-component response regulator ARR-A family	ko04075	Plant hormone signal transduction
Bm007823	K02900	RP-L27Ae, RPL27A; large subunit ribosomal protein L27Ae	ko03010	Ribosome
Bm007837	K14560	IMP3; U3 small nucleolar ribonucleoprotein protein IMP3	ko03008	Ribosome biogenesis in eukaryotes
Bm007851	K12600	SKI3, TTC37; superkiller protein 3	ko03018	RNA degradation
Bm007868	K04567	KARS, lysS; lysyl-tRNA synthetase, class II [EC:6.1.1.6]	ko00970	Aminoacyl-tRNA biosynthesis
Bm007869	K01188	E3.2.1.21; beta-glucosidase [EC:3.2.1.21]	ko00940	Phenylpropanoid biosynthesis
Bm007891	K02150	ATPeV1E, ATP6E; V-type H+-transporting ATPase subunit E	ko04145	Phagosome
Bm007893	K10843	ERCC3, XPB; DNA excision repair protein ERCC-3 [EC:5.6.2.4]	ko03420	Nucleotide excision repair
Bm007902	K11128	GAR1, NOLA1; H/ACA ribonucleoprotein complex subunit 1	ko03008	Ribosome biogenesis in eukaryotes
Bm007909	K05749	CYFIP; cytoplasmic FMR1 interacting protein	ko03013	Nucleocytoplasmic transport
Bm007915	K01739	metB; cystathionine gamma-synthase [EC:2.5.1.48]	ko00270	Cysteine and methionine metabolism
Bm007919	K00801	FDFT1; farnesyl-diphosphate farnesyltransferase [EC:2.5.1.21]	ko00100	Steroid biosynthesis
Bm007920	K09503	DNAJA2; DnaJ homolog subfamily A member 2	ko04141	Protein processing in endoplasmic reticulum
Bm007925	K00234	SDHA, SDH1; succinate dehydrogenase (ubiquinone) flavoprotein subunit [EC:1.3.5.1]	ko00020	Citrate cycle
Bm007927	K06443	lcyB, crtL1, crtY; lycopene beta-cyclase [EC:5.5.1.19]	ko00906	Carotenoid biosynthesis
Bm007937	K02871	RP-L13, MRPL13, rplM; large subunit ribosomal protein L13	ko03010	Ribosome
Bm007938	K11262	ACACA; acetyl-CoA carboxylase / biotin carboxylase 1 [EC:6.4.1.2 6.3.4.14 2.1.3.15]	ko00261	Monobactam biosynthesis
Bm007942	K02136	ATPeF1G, ATP5C1, ATP3; F-type H+-transporting ATPase subunit gamma	ko00190	Oxidative phosphorylation
Bm007946	K07889	RAB5C; Ras-related protein Rab-5C	ko04144	Endocytosis
Bm007953	K13508	GPAT; glycerol-3-phosphate acyltransferase [EC:2.3.1.15 2.3.1.198]	ko00561	Glycerolipid metabolism
Bm007960	K14563	NOP1, FBL; rRNA 2'-O-methyltransferase fibrillarin [EC:2.1.1.-]	ko03008	Ribosome biogenesis in eukaryotes
Bm007961	K14555	UTP13, TBL3; U3 small nucleolar RNA-associated protein 13	ko03008	Ribosome biogenesis in eukaryotes
Bm007969	K12355	REF1; coniferyl-aldehyde dehydrogenase [EC:1.2.1.68]	ko00940	Phenylpropanoid biosynthesis
Bm007972	K00831	serC, PSAT1; phosphoserine aminotransferase [EC:2.6.1.52]	ko00260	Glycine, serine and threonine metabolism
Bm007979	K13366	MPAO, PAO1; polyamine oxidase [EC:1.5.3.14 1.5.3.16 1.5.3.-]	ko00330	Arginine and proline metabolism
Bm007986	K02889	RP-L21e, RPL21; large subunit ribosomal protein L21e	ko03010	Ribosome
Bm007995	K06699	PSME4; proteasome activator subunit 4	ko03050	Proteasome
Bm008010	K01507	ppa; inorganic pyrophosphatase [EC:3.6.1.1]	ko00190	Oxidative phosphorylation
Bm008024	K01648	ACLY; ATP citrate (pro-S)-lyase [EC:2.3.3.8]	ko00020	Citrate cycle
Bm008026	K01648	ACLY; ATP citrate (pro-S)-lyase [EC:2.3.3.8]	ko00020	Citrate cycle
Bm008032	K12896	SRSF7, SFRS7; serine/arginine-rich splicing factor 7	ko03040	Spliceosome
Bm008035	K13457	RPM1, RPS3; disease resistance protein RPM1	ko04626	Plant-pathogen interaction
Bm008036	K01950	E6.3.5.1, NADSYN1, QNS1, nadE; NAD+ synthase (glutamine-hydrolysing) [EC:6.3.5.1]	ko00760	Nicotinate and nicotinamide metabolism
Bm008037	K10578	UBE2J1, NCUBE1, UBC6; ubiquitin-conjugating enzyme E2 J1 [EC:2.3.2.23]	ko04120	Ubiquitin mediated proteolysis
Bm008038	K10575	UBE2G1, UBC7; ubiquitin-conjugating enzyme E2 G1 [EC:2.3.2.23]	ko04120	Ubiquitin mediated proteolysis
Bm008039	K19011	OSC6; achilleol B synthase [EC:5.4.99.48]	ko00909	Sesquiterpenoid and triterpenoid biosynthesis
Bm008047	K07901	RAB8A, MEL; Ras-related protein Rab-8A	ko04144	Endocytosis
Bm008051	K15728	LPIN; phosphatidate phosphatase LPIN [EC:3.1.3.4]	ko00561	Glycerolipid metabolism
Bm008059	K04079	HSP90A, htpG; molecular chaperone HtpG	ko04141	Protein processing in endoplasmic reticulum
Bm008063	K02910	RP-L31e, RPL31; large subunit ribosomal protein L31e	ko03010	Ribosome
Bm008064	K03009	RPABC4, RPB12, POLR2K; DNA-directed RNA polymerases I, II, and III subunit RPABC4	ko03020	RNA polymerase
Bm008076	K11086	SNRPB, SMB; small nuclear ribonucleoprotein B and B'	ko03040	Spliceosome
Bm008077	K11086	SNRPB, SMB; small nuclear ribonucleoprotein B and B'	ko03040	Spliceosome
Bm008087	K03940	NDUFS7; NADH dehydrogenase (ubiquinone) Fe-S protein 7 [EC:7.1.1.2]	ko00190	Oxidative phosphorylation
Bm008114	K06269	PPP1C; serine/threonine-protein phosphatase PP1 catalytic subunit [EC:3.1.3.16]	ko03015	mRNA surveillance pathway
Bm008126	K05349	bglX; beta-glucosidase [EC:3.2.1.21]	ko00940	Phenylpropanoid biosynthesis
Bm008129	K00030	IDH3; isocitrate dehydrogenase (NAD+) [EC:1.1.1.41]	ko00020	Citrate cycle
Bm008141	K01872	AARS, alaS; alanyl-tRNA synthetase [EC:6.1.1.7]	ko00970	Aminoacyl-tRNA biosynthesis
Bm008142	K00121	frmA, ADH5, adhC; S-(hydroxymethyl)glutathione dehydrogenase / alcohol dehydrogenase [EC:1.1.1.284 1.1.1.1]	ko00350	Tyrosine metabolism
Bm008150	K07964	HPSE; heparanase [EC:3.2.1.166]	ko00531	Glycosaminoglycan degradation
Bm008155	K00026	MDH2; malate dehydrogenase [EC:1.1.1.37]	ko00270	Cysteine and methionine metabolism
Bm008160	K02918	RP-L35e, RPL35; large subunit ribosomal protein L35e	ko03010	Ribosome
Bm008167	K02942	RP-LP1, RPLP1; large subunit ribosomal protein LP1	ko03010	Ribosome
Bm008179	K00083	CAD; cinnamyl-alcohol dehydrogenase [EC:1.1.1.195]	ko00940	Phenylpropanoid biosynthesis
Bm008187	K12837	U2AF2; splicing factor U2AF 65 kDa subunit	ko03040	Spliceosome
Bm008193	K03781	katE, CAT, catB, srpA; catalase [EC:1.11.1.6]	ko04146	Peroxisome
Bm008199	K00383	GSR, gor; glutathione reductase (NADPH) [EC:1.8.1.7]	ko00480	Glutathione metabolism
Bm008201	K01689	ENO, eno; enolase [EC:4.2.1.11]	ko03018	RNA degradation
Bm008215	K00323	NNT; proton-translocating NAD(P)+ transhydrogenase [EC:7.1.1.1]	ko00760	Nicotinate and nicotinamide metabolism
Bm008228	K10527	MFP2; enoyl-CoA hydratase/3-hydroxyacyl-CoA dehydrogenase [EC:4.2.1.17 1.1.1.35 1.1.1.211]	ko00071	Fatty acid degradation
Bm008236	K13412	CPK; calcium-dependent protein kinase [EC:2.7.11.1]	ko04626	Plant-pathogen interaction
Bm008238	K03456	PPP2R1; serine/threonine-protein phosphatase 2A regulatory subunit A	ko03015	mRNA surveillance pathway
Bm008257	K18442	ARFGEF, BIG; brefeldin A-inhibited guanine nucleotide-exchange protein	ko04144	Endocytosis
Bm008264	K13412	CPK; calcium-dependent protein kinase [EC:2.7.11.1]	ko04626	Plant-pathogen interaction
Bm008267	K04382	PPP2C; serine/threonine-protein phosphatase 2A catalytic subunit [EC:3.1.3.16]	ko03015	mRNA surveillance pathway
Bm008268	K04382	PPP2C; serine/threonine-protein phosphatase 2A catalytic subunit [EC:3.1.3.16]	ko03015	mRNA surveillance pathway
Bm008270	K14492	ARR-A; two-component response regulator ARR-A family	ko04075	Plant hormone signal transduction
Bm008272	K09490	HSPA5, BIP; endoplasmic reticulum chaperone BiP [EC:3.6.4.10]	ko03060	Protein export
Bm008274	K00499	CMO; choline monooxygenase [EC:1.14.15.7]	ko00260	Glycine, serine and threonine metabolism
Bm008279	K05658	ABCB1, CD243; ATP-binding cassette, subfamily B (MDR/TAP), member 1 [EC:7.6.2.2]	ko02010	ABC transporters
Bm008280	K00264	GLT1; glutamate synthase (NADH) [EC:1.4.1.14]	ko00250	Alanine, aspartate and glutamate metabolism
Bm008303	K06689	UBE2D, UBC4, UBC5; ubiquitin-conjugating enzyme E2 D [EC:2.3.2.23]	ko04120	Ubiquitin mediated proteolysis
Bm008304	K12572	PAN3; PAB-dependent poly(A)-specific ribonuclease subunit 3	ko03018	RNA degradation
Bm008314	K10956	SEC61A; protein transport protein SEC61 subunit alpha	ko04145	Phagosome
Bm008315	K00088	IMPDH, guaB; IMP dehydrogenase [EC:1.1.1.205]	ko00230	Purine metabolism
Bm008316	K00088	IMPDH, guaB; IMP dehydrogenase [EC:1.1.1.205]	ko00230	Purine metabolism
Bm008317	K00088	IMPDH, guaB; IMP dehydrogenase [EC:1.1.1.205]	ko00230	Purine metabolism
Bm008319	K13447	RBOH; respiratory burst oxidase [EC:1.6.3.- 1.11.1.-]	ko04626	Plant-pathogen interaction
Bm008322	K16055	TPS; trehalose 6-phosphate synthase/phosphatase [EC:2.4.1.15 3.1.3.12]	ko00500	Starch and sucrose metabolism
Bm008343	K01875	SARS, serS; seryl-tRNA synthetase [EC:6.1.1.11]	ko00970	Aminoacyl-tRNA biosynthesis
Bm008348	K03030	PSMD14, RPN11, POH1; 26S proteasome regulatory subunit N11	ko03050	Proteasome
Bm008359	K00814	GPT, ALT; alanine transaminase [EC:2.6.1.2]	ko00220	Arginine biosynthesis
Bm008376	K13342	PEX5, PXR1; peroxin-5	ko04146	Peroxisome
Bm008401	K01807	rpiA; ribose 5-phosphate isomerase A [EC:5.3.1.6]	ko00030	Pentose phosphate pathway
Bm008418	K01904	4CL; 4-coumarate--CoA ligase [EC:6.2.1.12]	ko00360	Phenylalanine metabolism
Bm008432	K01874	MARS, metG; methionyl-tRNA synthetase [EC:6.1.1.10]	ko00970	Aminoacyl-tRNA biosynthesis
Bm008433	K06269	PPP1C; serine/threonine-protein phosphatase PP1 catalytic subunit [EC:3.1.3.16]	ko03015	mRNA surveillance pathway
Bm008436	K04043	dnaK, HSPA9; molecular chaperone DnaK	ko03018	RNA degradation
Bm008437	K04043	dnaK, HSPA9; molecular chaperone DnaK	ko03018	RNA degradation
Bm008438	K13427	NOA1; nitric-oxide synthase, plant [EC:1.14.13.39]	ko00220	Arginine biosynthesis
Bm008439	K04392	RAC1; Ras-related C3 botulinum toxin substrate 1	ko04145	Phagosome
Bm008451	K10661	MARCH6, DOA10; E3 ubiquitin-protein ligase MARCH6 [EC:2.3.2.27]	ko04141	Protein processing in endoplasmic reticulum
Bm008465	K02734	PSMB2; 20S proteasome subunit beta 4 [EC:3.4.25.1]	ko03050	Proteasome
Bm008476	K00128	ALDH; aldehyde dehydrogenase (NAD+) [EC:1.2.1.3]	ko00280	Valine, leucine and isoleucine degradation
Bm008482	K14490	AHP; histidine-containing phosphotransfer peotein	ko04075	Plant hormone signal transduction
Bm008490	K11097	SNRPE, SME; small nuclear ribonucleoprotein E	ko03040	Spliceosome
Bm008494	K14327	UPF2, RENT2; regulator of nonsense transcripts 2	ko03013	Nucleocytoplasmic transport
Bm008498	K03965	NDUFB9; NADH dehydrogenase (ubiquinone) 1 beta subcomplex subunit 9	ko00190	Oxidative phosphorylation
Bm008506	K08901	psbQ; photosystem II oxygen-evolving enhancer protein 3	ko00195	Photosynthesis
Bm008512	K00889	PIP5K; 1-phosphatidylinositol-4-phosphate 5-kinase [EC:2.7.1.68]	ko04144	Endocytosis
Bm008564	K12607	CNOT10; CCR4-NOT transcription complex subunit 10	ko03018	RNA degradation
Bm008565	K01205	NAGLU; alpha-N-acetylglucosaminidase [EC:3.2.1.50]	ko00531	Glycosaminoglycan degradation
Bm008585	K00264	GLT1; glutamate synthase (NADH) [EC:1.4.1.14]	ko00250	Alanine, aspartate and glutamate metabolism
Bm008591	K00999	CDIPT; CDP-diacylglycerol--inositol 3-phosphatidyltransferase [EC:2.7.8.11]	ko04070	Phosphatidylinositol signaling system
Bm008602	K12663	ECH1; Delta3,5-Delta2,4-dienoyl-CoA isomerase [EC:5.3.3.21]	ko04146	Peroxisome
Bm008606	K14491	ARR-B; two-component response regulator ARR-B family	ko04075	Plant hormone signal transduction
Bm008610	K01919	gshA; glutamate--cysteine ligase [EC:6.3.2.2]	ko00480	Glutathione metabolism
Bm008614	K02883	RP-L18e, RPL18; large subunit ribosomal protein L18e	ko03010	Ribosome
Bm008623	K00860	cysC; adenylylsulfate kinase [EC:2.7.1.25]	ko00920	Sulfur metabolism
Bm008632	K01904	4CL; 4-coumarate--CoA ligase [EC:6.2.1.12]	ko00360	Phenylalanine metabolism
Bm008637	K02132	ATPeF1A, ATP5A1, ATP1; F-type H+-transporting ATPase subunit alpha	ko00190	Oxidative phosphorylation
Bm008638	K01087	otsB; trehalose 6-phosphate phosphatase [EC:3.1.3.12]	ko00500	Starch and sucrose metabolism
Bm008640	K12607	CNOT10; CCR4-NOT transcription complex subunit 10	ko03018	RNA degradation
Bm008641	K01103	PFKFB3; 6-phosphofructo-2-kinase / fructose-2,6-biphosphatase 3 [EC:2.7.1.105 3.1.3.46]	ko00051	Fructose and mannose metabolism
Bm008647	K08515	VAMP7; vesicle-associated membrane protein 7	ko04130	SNARE interactions in vesicular transport
Bm008648	K12831	SF3B4, SAP49; splicing factor 3B subunit 4	ko03040	Spliceosome
Bm008667	K02894	RP-L23e, RPL23; large subunit ribosomal protein L23e	ko03010	Ribosome
Bm008668	K02894	RP-L23e, RPL23; large subunit ribosomal protein L23e	ko03010	Ribosome
Bm008672	K10760	IPT; adenylate dimethylallyltransferase (cytokinin synthase) [EC:2.5.1.27 2.5.1.112]	ko00908	Zeatin biosynthesis
Bm008677	K14457	MOGAT2, MGAT2; 2-acylglycerol O-acyltransferase 2 [EC:2.3.1.22]	ko00561	Glycerolipid metabolism
Bm008679	K14457	MOGAT2, MGAT2; 2-acylglycerol O-acyltransferase 2 [EC:2.3.1.22]	ko00561	Glycerolipid metabolism
Bm008680	K14457	MOGAT2, MGAT2; 2-acylglycerol O-acyltransferase 2 [EC:2.3.1.22]	ko00561	Glycerolipid metabolism
Bm008700	K04392	RAC1; Ras-related C3 botulinum toxin substrate 1	ko04145	Phagosome
Bm008707	K00645	fabD, MCAT, MCT1; [acyl-carrier-protein] S-malonyltransferase [EC:2.3.1.39]	ko00061	Fatty acid biosynthesis
Bm008710	K04043	dnaK, HSPA9; molecular chaperone DnaK	ko03018	RNA degradation
Bm008711	K12501	HST; homogentisate solanesyltransferase [EC:2.5.1.117]	ko00130	Ubiquinone and other terpenoid-quinone biosynthesis
Bm008721	K00422	E1.10.3.1; polyphenol oxidase [EC:1.10.3.1]	ko00350	Tyrosine metabolism
Bm008726	K06215	pdxS, pdx1; pyridoxal 5'-phosphate synthase pdxS subunit [EC:4.3.3.6]	ko00750	Vitamin B6 metabolism
Bm008727	K12121	PHYB; phytochrome B	ko04712	Circadian rhythm - plant
Bm008731	K01373	CTSF; cathepsin F [EC:3.4.22.41]	ko04626	Plant-pathogen interaction
Bm008732	K12946	SPCS1; signal peptidase complex subunit 1 [EC:3.4.-.-]	ko03060	Protein export
Bm008737	K09422	MYBP; transcription factor MYB, plant	ko04626	Plant-pathogen interaction
Bm008740	K12309	GLB1, ELNR1; beta-galactosidase [EC:3.2.1.23]	ko00052	Galactose metabolism
Bm008744	K03246	EIF3I; translation initiation factor 3 subunit I	ko03013	Nucleocytoplasmic transport
Bm008757	K15639	CYP734A1, BAS1; PHYB activation tagged suppressor 1 [EC:1.14.-.-]	ko00905	Brassinosteroid biosynthesis
Bm008786	K09753	CCR; cinnamoyl-CoA reductase [EC:1.2.1.44]	ko00940	Phenylpropanoid biosynthesis
Bm008794	K10901	BLM, RECQL3, SGS1; bloom syndrome protein [EC:5.6.2.4]	ko03440	Homologous recombination
Bm008795	K00901	dgkA, DGK; diacylglycerol kinase (ATP) [EC:2.7.1.107]	ko04070	Phosphatidylinositol signaling system
Bm008806	K01490	AMPD; AMP deaminase [EC:3.5.4.6]	ko00230	Purine metabolism
Bm008807	K03934	NDUFS1; NADH dehydrogenase (ubiquinone) Fe-S protein 1 [EC:7.1.1.2]	ko00190	Oxidative phosphorylation
Bm008810	K03942	NDUFV1; NADH dehydrogenase (ubiquinone) flavoprotein 1 [EC:7.1.1.2]	ko00190	Oxidative phosphorylation
Bm008821	K02965	RP-S19, rpsS; small subunit ribosomal protein S19	ko03010	Ribosome
Bm008831	K00088	IMPDH, guaB; IMP dehydrogenase [EC:1.1.1.205]	ko00230	Purine metabolism
Bm008833	K07937	ARF1_2; ADP-ribosylation factor 1/2	ko04144	Endocytosis
Bm008846	K01051	E3.1.1.11; pectinesterase [EC:3.1.1.11]	ko00040	Pentose and glucuronate interconversions
Bm008852	K00029	maeB; malate dehydrogenase (oxaloacetate-decarboxylating)(NADP+) [EC:1.1.1.40]	ko00620	Pyruvate metabolism
Bm008854	K09523	DNAJC3; DnaJ homolog subfamily C member 3	ko04141	Protein processing in endoplasmic reticulum
Bm008860	K11131	DKC1, NOLA4, CBF5; H/ACA ribonucleoprotein complex subunit 4 [EC:5.4.99.-]	ko03008	Ribosome biogenesis in eukaryotes
Bm008862	K11129	NHP2, NOLA2; H/ACA ribonucleoprotein complex subunit 2	ko03008	Ribosome biogenesis in eukaryotes
Bm008866	K02924	RP-L39e, RPL39; large subunit ribosomal protein L39e	ko03010	Ribosome
Bm008870	K08057	CALR; calreticulin	ko04145	Phagosome
Bm008872	K01711	gmd, GMDS; GDPmannose 4,6-dehydratase [EC:4.2.1.47]	ko00051	Fructose and mannose metabolism
Bm008873	K06700	PSMF1; proteasome inhibitor subunit 1 (PI31)	ko03050	Proteasome
Bm008878	K00967	PCYT2; ethanolamine-phosphate cytidylyltransferase [EC:2.7.7.14]	ko00564	Glycerophospholipid metabolism
Bm008887	K02866	RP-L10e, RPL10; large subunit ribosomal protein L10e	ko03010	Ribosome
Bm008896	K02976	RP-S26e, RPS26; small subunit ribosomal protein S26e	ko03010	Ribosome
Bm008898	K12604	CNOT1, NOT1; CCR4-NOT transcription complex subunit 1	ko03018	RNA degradation
Bm008901	K02155	ATPeV0C, ATP6L; V-type H+-transporting ATPase 16kDa proteolipid subunit	ko04145	Phagosome
Bm008904	K07178	RIOK1; RIO kinase 1 [EC:2.7.11.1]	ko03008	Ribosome biogenesis in eukaryotes
Bm008916	K10577	UBE2I, UBC9; ubiquitin-conjugating enzyme E2 I	ko04120	Ubiquitin mediated proteolysis
Bm008917	K02995	RP-S8e, RPS8; small subunit ribosomal protein S8e	ko03010	Ribosome
Bm008920	K10781	FATB; fatty acyl-ACP thioesterase B [EC:3.1.2.14 3.1.2.21]	ko00061	Fatty acid biosynthesis
Bm008922	K02880	RP-L17e, RPL17; large subunit ribosomal protein L17e	ko03010	Ribosome
Bm008938	K01764	HCCS; cytochrome c heme-lyase [EC:4.4.1.17]	ko00860	Porphyrin metabolism
Bm008940	K02900	RP-L27Ae, RPL27A; large subunit ribosomal protein L27Ae	ko03010	Ribosome
Bm008941	K02991	RP-S6e, RPS6; small subunit ribosomal protein S6e	ko03010	Ribosome
Bm008945	K17890	ATG16L1; autophagy-related protein 16-1	ko04140	Autophagy - animal
Bm008952	K00627	DLAT, aceF, pdhC; pyruvate dehydrogenase E2 component (dihydrolipoyllysine-residue acetyltransferase) [EC:2.3.1.12]	ko00010	Glycolysis / Gluconeogenesis
Bm008965	K14411	MSI; RNA-binding protein Musashi	ko03015	mRNA surveillance pathway
Bm008966	K14411	MSI; RNA-binding protein Musashi	ko03015	mRNA surveillance pathway
Bm008967	K01507	ppa; inorganic pyrophosphatase [EC:3.6.1.1]	ko00190	Oxidative phosphorylation
Bm008968	K01514	PRUNE, PPX1; exopolyphosphatase [EC:3.6.1.11]	ko00230	Purine metabolism
Bm008979	K07765	MBTPS2; S2P endopeptidase [EC:3.4.24.85]	ko04141	Protein processing in endoplasmic reticulum
Bm008987	K02981	RP-S2e, RPS2; small subunit ribosomal protein S2e	ko03010	Ribosome
Bm008997	K02981	RP-S2e, RPS2; small subunit ribosomal protein S2e	ko03010	Ribosome
Bm009001	K02918	RP-L35e, RPL35; large subunit ribosomal protein L35e	ko03010	Ribosome
Bm009014	K14300	NUP133; nuclear pore complex protein Nup133	ko03013	Nucleocytoplasmic transport
Bm009018	K13025	EIF4A3, FAL1; ATP-dependent RNA helicase [EC:3.6.4.13]	ko03040	Spliceosome
Bm009025	K12896	SRSF7, SFRS7; serine/arginine-rich splicing factor 7	ko03040	Spliceosome
Bm009028	K07375	TUBB; tubulin beta	ko04145	Phagosome
Bm009030	K02880	RP-L17e, RPL17; large subunit ribosomal protein L17e	ko03010	Ribosome
Bm009035	K00383	GSR, gor; glutathione reductase (NADPH) [EC:1.8.1.7]	ko00480	Glutathione metabolism
Bm009039	K02920	RP-L36e, RPL36; large subunit ribosomal protein L36e	ko03010	Ribosome
Bm009043	K04713	SUR2; sphinganine C4-monooxygenase [EC:1.14.18.5]	ko00600	Sphingolipid metabolism
Bm009050	K14003	PREB, SEC12; prolactin regulatory element-binding protein	ko04141	Protein processing in endoplasmic reticulum
Bm009051	K12446	E2.7.1.46; L-arabinokinase [EC:2.7.1.46]	ko00520	Amino sugar and nucleotide sugar metabolism
Bm009056	K02993	RP-S7e, RPS7; small subunit ribosomal protein S7e	ko03010	Ribosome
Bm009059	K00049	GRHPR; glyoxylate/hydroxypyruvate reductase [EC:1.1.1.79 1.1.1.81]	ko00260	Glycine, serine and threonine metabolism
Bm009086	K10579	UBE2M, UBC12; ubiquitin-conjugating enzyme E2 M [EC:2.3.2.34]	ko04120	Ubiquitin mediated proteolysis
Bm009097	K02993	RP-S7e, RPS7; small subunit ribosomal protein S7e	ko03010	Ribosome
Bm009098	K00164	OGDH, sucA; 2-oxoglutarate dehydrogenase E1 component [EC:1.2.4.2]	ko00310	Lysine degradation
Bm009102	K01641	HMGCS; hydroxymethylglutaryl-CoA synthase [EC:2.3.3.10]	ko00280	Valine, leucine and isoleucine degradation
Bm009103	K04371	ERK, MAPK1_3; mitogen-activated protein kinase 1/3 [EC:2.7.11.24]	ko04626	Plant-pathogen interaction
Bm009106	K00759	APRT, apt; adenine phosphoribosyltransferase [EC:2.4.2.7]	ko00230	Purine metabolism
Bm009110	K02993	RP-S7e, RPS7; small subunit ribosomal protein S7e	ko03010	Ribosome
Bm009118	K06943	NOG1; nucleolar GTP-binding protein	ko03008	Ribosome biogenesis in eukaryotes
Bm009122	K03254	EIF3A; translation initiation factor 3 subunit A	ko03013	Nucleocytoplasmic transport
Bm009129	K17761	SSADH; succinate-semialdehyde dehydrogenase, mitochondrial [EC:1.2.1.24]	ko00250	Alanine, aspartate and glutamate metabolism
Bm009150	K14431	TGA; transcription factor TGA	ko04075	Plant hormone signal transduction
Bm009160	K14431	TGA; transcription factor TGA	ko04075	Plant hormone signal transduction
Bm009166	K14424	SMO2; plant 4alpha-monomethylsterol monooxygenase [EC:1.14.18.11]	ko00100	Steroid biosynthesis
Bm009170	K00140	mmsA, iolA, ALDH6A1; malonate-semialdehyde dehydrogenase (acetylating) / methylmalonate-semialdehyde dehydrogenase [EC:1.2.1.18 1.2.1.27]	ko00280	Valine, leucine and isoleucine degradation
Bm009172	K18442	ARFGEF, BIG; brefeldin A-inhibited guanine nucleotide-exchange protein	ko04144	Endocytosis
Bm009173	K18442	ARFGEF, BIG; brefeldin A-inhibited guanine nucleotide-exchange protein	ko04144	Endocytosis
Bm009206	K01687	ilvD; dihydroxy-acid dehydratase [EC:4.2.1.9]	ko00290	Valine, leucine and isoleucine biosynthesis
Bm009208	K12835	DDX42, SF3B125; ATP-dependent RNA helicase DDX42 [EC:3.6.4.13]	ko03040	Spliceosome
Bm009213	K03644	lipA, LIAS, LIP1, LIP5; lipoyl synthase [EC:2.8.1.8]	ko00785	Lipoic acid metabolism
Bm009223	K05754	ARPC5; actin related protein 2/3 complex, subunit 5	ko04144	Endocytosis
Bm009255	K02261	COX2; cytochrome c oxidase subunit 2	ko00190	Oxidative phosphorylation
Bm009257	K12867	SYF1, XAB2; pre-mRNA-splicing factor SYF1	ko03040	Spliceosome
Bm009258	K12604	CNOT1, NOT1; CCR4-NOT transcription complex subunit 1	ko03018	RNA degradation
Bm009262	K00850	pfkA, PFK; 6-phosphofructokinase 1 [EC:2.7.1.11]	ko03018	RNA degradation
Bm009271	K03018	RPC1, POLR3A; DNA-directed RNA polymerase III subunit RPC1 [EC:2.7.7.6]	ko03020	RNA polymerase
Bm009280	K12812	DDX39B, UAP56, SUB2; ATP-dependent RNA helicase UAP56/SUB2 [EC:3.6.4.13]	ko03040	Spliceosome
Bm009287	K00940	ndk, NME; nucleoside-diphosphate kinase [EC:2.7.4.6]	ko00230	Purine metabolism
Bm009289	K02960	RP-S16e, RPS16; small subunit ribosomal protein S16e	ko03010	Ribosome
Bm009290	K02979	RP-S28e, RPS28; small subunit ribosomal protein S28e	ko03010	Ribosome
Bm009293	K12874	AQR; intron-binding protein aquarius	ko03040	Spliceosome
Bm009294	K01869	LARS, leuS; leucyl-tRNA synthetase [EC:6.1.1.4]	ko00970	Aminoacyl-tRNA biosynthesis
Bm009295	K03781	katE, CAT, catB, srpA; catalase [EC:1.11.1.6]	ko04146	Peroxisome
Bm009301	K08504	BET1; blocked early in transport 1	ko04130	SNARE interactions in vesicular transport
Bm009304	K00434	E1.11.1.11; L-ascorbate peroxidase [EC:1.11.1.11]	ko00053	Ascorbate and aldarate metabolism
Bm009311	K14066	GPS; geranyl diphosphate synthase [EC:2.5.1.1]	ko00900	Terpenoid backbone biosynthesis
Bm009318	K02154	ATPeV0A, ATP6N; V-type H+-transporting ATPase subunit a	ko04145	Phagosome
Bm009321	K09523	DNAJC3; DnaJ homolog subfamily C member 3	ko04141	Protein processing in endoplasmic reticulum
Bm009338	K02988	RP-S5, MRPS5, rpsE; small subunit ribosomal protein S5	ko03010	Ribosome
Bm009339	K02947	RP-S10e, RPS10; small subunit ribosomal protein S10e	ko03010	Ribosome
Bm009341	K12124	GI; GIGANTEA	ko04712	Circadian rhythm - plant
Bm009342	K02949	RP-S11e, RPS11; small subunit ribosomal protein S11e	ko03010	Ribosome
Bm009352	K00566	mnmA, trmU; tRNA-uridine 2-sulfurtransferase [EC:2.8.1.13]	ko04122	Sulfur relay system
Bm009362	K03517	nadA; quinolinate synthase [EC:2.5.1.72]	ko00760	Nicotinate and nicotinamide metabolism
Bm009364	K00134	GAPDH, gapA; glyceraldehyde 3-phosphate dehydrogenase (phosphorylating) [EC:1.2.1.12]	ko00010	Glycolysis / Gluconeogenesis
Bm009369	K03517	nadA; quinolinate synthase [EC:2.5.1.72]	ko00760	Nicotinate and nicotinamide metabolism
Bm009370	K03517	nadA; quinolinate synthase [EC:2.5.1.72]	ko00760	Nicotinate and nicotinamide metabolism
Bm009374	K04079	HSP90A, htpG; molecular chaperone HtpG	ko04141	Protein processing in endoplasmic reticulum
Bm009379	K01736	aroC; chorismate synthase [EC:4.2.3.5]	ko00400	Phenylalanine, tyrosine and tryptophan biosynthesis
Bm009399	K00326	CYB5R; cytochrome-b5 reductase [EC:1.6.2.2]	ko00520	Amino sugar and nucleotide sugar metabolism
Bm009401	K02969	RP-S20e, RPS20; small subunit ribosomal protein S20e	ko03010	Ribosome
Bm009413	K12850	PRPF38B; pre-mRNA-splicing factor 38B	ko03040	Spliceosome
Bm009430	K00387	SUOX; sulfite oxidase [EC:1.8.3.1]	ko00920	Sulfur metabolism
Bm009434	K14498	SNRK2; serine/threonine-protein kinase SRK2 [EC:2.7.11.1]	ko04075	Plant hormone signal transduction
Bm009440	K03781	katE, CAT, catB, srpA; catalase [EC:1.11.1.6]	ko04146	Peroxisome
Bm009445	K00128	ALDH; aldehyde dehydrogenase (NAD+) [EC:1.2.1.3]	ko00280	Valine, leucine and isoleucine degradation
Bm009446	K00128	ALDH; aldehyde dehydrogenase (NAD+) [EC:1.2.1.3]	ko00280	Valine, leucine and isoleucine degradation
Bm009448	K00128	ALDH; aldehyde dehydrogenase (NAD+) [EC:1.2.1.3]	ko00280	Valine, leucine and isoleucine degradation
Bm009449	K09422	MYBP; transcription factor MYB, plant	ko04626	Plant-pathogen interaction
Bm009450	K09422	MYBP; transcription factor MYB, plant	ko04626	Plant-pathogen interaction
Bm009461	K10712	ADO; cysteamine dioxygenase [EC:1.13.11.19]	ko00430	Taurine and hypotaurine metabolism
Bm009463	K01188	E3.2.1.21; beta-glucosidase [EC:3.2.1.21]	ko00940	Phenylpropanoid biosynthesis
Bm009475	K00134	GAPDH, gapA; glyceraldehyde 3-phosphate dehydrogenase (phosphorylating) [EC:1.2.1.12]	ko00010	Glycolysis / Gluconeogenesis
Bm009478	K00134	GAPDH, gapA; glyceraldehyde 3-phosphate dehydrogenase (phosphorylating) [EC:1.2.1.12]	ko00010	Glycolysis / Gluconeogenesis
Bm009488	K03257	EIF4A; translation initiation factor 4A	ko03013	Nucleocytoplasmic transport
Bm009496	K01626	E2.5.1.54, aroF, aroG, aroH; 3-deoxy-7-phosphoheptulonate synthase [EC:2.5.1.54]	ko00400	Phenylalanine, tyrosine and tryptophan biosynthesis
Bm009500	K12604	CNOT1, NOT1; CCR4-NOT transcription complex subunit 1	ko03018	RNA degradation
Bm009509	K01889	FARSA, pheS; phenylalanyl-tRNA synthetase alpha chain [EC:6.1.1.20]	ko00970	Aminoacyl-tRNA biosynthesis
Bm009513	K03246	EIF3I; translation initiation factor 3 subunit I	ko03013	Nucleocytoplasmic transport
Bm009526	K02927	RP-L40e, RPL40, UBA52; ubiquitin-large subunit ribosomal protein L40e	ko03010	Ribosome
Bm009532	K04706	PIAS1; E3 SUMO-protein ligase PIAS1 [EC:2.3.2.-]	ko04120	Ubiquitin mediated proteolysis
Bm009551	K17761	SSADH; succinate-semialdehyde dehydrogenase, mitochondrial [EC:1.2.1.24]	ko00250	Alanine, aspartate and glutamate metabolism
Bm009554	K07936	RAN; GTP-binding nuclear protein Ran	ko03008	Ribosome biogenesis in eukaryotes
Bm009566	K00432	gpx, btuE, bsaA; glutathione peroxidase [EC:1.11.1.9]	ko00590	Arachidonic acid metabolism
Bm009567	K03021	RPC2, POLR3B; DNA-directed RNA polymerase III subunit RPC2 [EC:2.7.7.6]	ko03020	RNA polymerase
Bm009570	K00432	gpx, btuE, bsaA; glutathione peroxidase [EC:1.11.1.9]	ko00590	Arachidonic acid metabolism
Bm009598	K09658	DPM2; dolichol phosphate-mannose biosynthesis regulatory protein	ko00510	N-Glycan biosynthesis
Bm009599	K09658	DPM2; dolichol phosphate-mannose biosynthesis regulatory protein	ko00510	N-Glycan biosynthesis
Bm009609	K00012	UGDH, ugd; UDPglucose 6-dehydrogenase [EC:1.1.1.22]	ko00040	Pentose and glucuronate interconversions
Bm009611	K15634	gpmB; 2,3-bisphosphoglycerate-dependent phosphoglycerate mutase [EC:5.4.2.11]	ko00260	Glycine, serine and threonine metabolism
Bm009619	K13356	FAR; alcohol-forming fatty acyl-CoA reductase [EC:1.2.1.84]	ko04146	Peroxisome
Bm009628	K08967	mtnD, mtnZ, ADI1; 1,2-dihydroxy-3-keto-5-methylthiopentene dioxygenase [EC:1.13.11.53 1.13.11.54]	ko00270	Cysteine and methionine metabolism
Bm009633	K13667	POGLUT1, RUMI, KTELC1; EGF-domain serine glucosyl/xylosyltransferase [EC:2.4.1.376 2.4.2.63]	ko00510	N-Glycan biosynthesis
Bm009634	K14295	NUP50, NPAP60; nuclear pore complex protein Nup50	ko03013	Nucleocytoplasmic transport
Bm009648	K03035	PSMD12, RPN5; 26S proteasome regulatory subunit N5	ko03050	Proteasome
Bm009649	K03004	RPA43, POLR1F, TWISTNB; DNA-directed RNA polymerase I subunit RPA43	ko03020	RNA polymerase
Bm009659	K10879	XRCC2; DNA-repair protein XRCC2	ko03440	Homologous recombination
Bm009672	K10590	TRIP12; E3 ubiquitin-protein ligase TRIP12 [EC:2.3.2.26]	ko04120	Ubiquitin mediated proteolysis
Bm009688	K00700	GBE1, glgB; 1,4-alpha-glucan branching enzyme [EC:2.4.1.18]	ko00500	Starch and sucrose metabolism
Bm009695	K02920	RP-L36e, RPL36; large subunit ribosomal protein L36e	ko03010	Ribosome
Bm009697	K02887	RP-L20, MRPL20, rplT; large subunit ribosomal protein L20	ko03010	Ribosome
Bm009707	K02938	RP-L8e, RPL8; large subunit ribosomal protein L8e	ko03010	Ribosome
Bm009710	K03108	SRP72; signal recognition particle subunit SRP72	ko03060	Protein export
Bm009712	K01595	ppc; phosphoenolpyruvate carboxylase [EC:4.1.1.31]	ko00620	Pyruvate metabolism
Bm009714	K13412	CPK; calcium-dependent protein kinase [EC:2.7.11.1]	ko04626	Plant-pathogen interaction
Bm009718	K11131	DKC1, NOLA4, CBF5; H/ACA ribonucleoprotein complex subunit 4 [EC:5.4.99.-]	ko03008	Ribosome biogenesis in eukaryotes
Bm009719	K11131	DKC1, NOLA4, CBF5; H/ACA ribonucleoprotein complex subunit 4 [EC:5.4.99.-]	ko03008	Ribosome biogenesis in eukaryotes
Bm009720	K01785	galM, GALM; aldose 1-epimerase [EC:5.1.3.3]	ko00010	Glycolysis / Gluconeogenesis
Bm009724	K07198	PRKAA, AMPK; 5'-AMP-activated protein kinase, catalytic alpha subunit [EC:2.7.11.31]	ko04140	Autophagy - animal
Bm009730	K15893	HPR1; glycerate dehydrogenase [EC:1.1.1.29]	ko00260	Glycine, serine and threonine metabolism
Bm009731	K15893	HPR1; glycerate dehydrogenase [EC:1.1.1.29]	ko00260	Glycine, serine and threonine metabolism
Bm009736	K00940	ndk, NME; nucleoside-diphosphate kinase [EC:2.7.4.6]	ko00230	Purine metabolism
Bm009739	K08730	PTDSS2; phosphatidylserine synthase 2 [EC:2.7.8.29]	ko00564	Glycerophospholipid metabolism
Bm009754	K01897	ACSL, fadD; long-chain acyl-CoA synthetase [EC:6.2.1.3]	ko04146	Peroxisome
Bm009756	K11129	NHP2, NOLA2; H/ACA ribonucleoprotein complex subunit 2	ko03008	Ribosome biogenesis in eukaryotes
Bm009760	K11599	POMP, UMP1; proteasome maturation protein	ko03050	Proteasome
Bm009775	K02434	gatB, PET112; aspartyl-tRNA(Asn)/glutamyl-tRNA(Gln) amidotransferase subunit B [EC:6.3.5.6 6.3.5.7]	ko00970	Aminoacyl-tRNA biosynthesis
Bm009786	K07511	ECHS1; enoyl-CoA hydratase [EC:4.2.1.17]	ko00280	Valine, leucine and isoleucine degradation
Bm009787	K07374	TUBA; tubulin alpha	ko04145	Phagosome
Bm009790	K03029	PSMD4, RPN10; 26S proteasome regulatory subunit N10	ko03050	Proteasome
Bm009792	K10843	ERCC3, XPB; DNA excision repair protein ERCC-3 [EC:5.6.2.4]	ko03420	Nucleotide excision repair
Bm009797	K02938	RP-L8e, RPL8; large subunit ribosomal protein L8e	ko03010	Ribosome
Bm009799	K02998	RP-SAe, RPSA; small subunit ribosomal protein SAe	ko03010	Ribosome
Bm009804	K01760	metC; cysteine-S-conjugate beta-lyase [EC:4.4.1.13]	ko00270	Cysteine and methionine metabolism
Bm009807	K14416	HBS1; elongation factor 1 alpha-like protein	ko03015	mRNA surveillance pathway
Bm009808	K14416	HBS1; elongation factor 1 alpha-like protein	ko03015	mRNA surveillance pathway
Bm009842	K03841	FBP, fbp; fructose-1,6-bisphosphatase I [EC:3.1.3.11]	ko00010	Glycolysis / Gluconeogenesis
Bm009849	K01759	GLO1, gloA; lactoylglutathione lyase [EC:4.4.1.5]	ko00620	Pyruvate metabolism
Bm009859	K00029	maeB; malate dehydrogenase (oxaloacetate-decarboxylating)(NADP+) [EC:1.1.1.40]	ko00620	Pyruvate metabolism
Bm009861	K15746	crtZ; beta-carotene 3-hydroxylase [EC:1.14.15.24]	ko00906	Carotenoid biosynthesis
Bm009871	K02728	PSMA4; 20S proteasome subunit alpha 3 [EC:3.4.25.1]	ko03050	Proteasome
Bm009874	K02922	RP-L37e, RPL37; large subunit ribosomal protein L37e	ko03010	Ribosome
Bm009883	K12823	DDX5, DBP2; ATP-dependent RNA helicase DDX5/DBP2 [EC:3.6.4.13]	ko03040	Spliceosome
Bm009889	K10688	UBE2W, UBC16; ubiquitin-conjugating enzyme E2 W [EC:2.3.2.25]	ko04120	Ubiquitin mediated proteolysis
Bm009892	K10532	HGSNAT; heparan-alpha-glucosaminide N-acetyltransferase [EC:2.3.1.78]	ko00531	Glycosaminoglycan degradation
Bm009894	K01641	HMGCS; hydroxymethylglutaryl-CoA synthase [EC:2.3.3.10]	ko00280	Valine, leucine and isoleucine degradation
Bm009920	K02978	RP-S27e, RPS27; small subunit ribosomal protein S27e	ko03010	Ribosome
Bm009931	K12449	AXS; UDP-apiose/xylose synthase	ko00520	Amino sugar and nucleotide sugar metabolism
Bm009938	K02260	COX17; cytochrome c oxidase assembly protein subunit 17	ko00190	Oxidative phosphorylation
Bm009942	K10882	EME1, MMS4; crossover junction endonuclease EME1 [EC:3.1.22.-]	ko03440	Homologous recombination
Bm009943	K10882	EME1, MMS4; crossover junction endonuclease EME1 [EC:3.1.22.-]	ko03440	Homologous recombination
Bm009962	K02639	petF; ferredoxin	ko00195	Photosynthesis
Bm009968	K14497	PP2C; protein phosphatase 2C [EC:3.1.3.16]	ko04075	Plant hormone signal transduction
Bm009970	K12199	VTA1, LIP5; vacuolar protein sorting-associated protein VTA1	ko04144	Endocytosis
Bm009971	K02326	POLE3; DNA polymerase epsilon subunit 3 [EC:2.7.7.7]	ko03030	DNA replication
Bm009982	K04392	RAC1; Ras-related C3 botulinum toxin substrate 1	ko04145	Phagosome
Bm009990	K10364	CAPZA; F-actin-capping protein subunit alpha	ko04144	Endocytosis
Bm009991	K03260	EIF4G; translation initiation factor 4G	ko03013	Nucleocytoplasmic transport
Bm010004	K13137	STRAP, UNRIP; serine-threonine kinase receptor-associated protein	ko03013	Nucleocytoplasmic transport
Bm010005	K13137	STRAP, UNRIP; serine-threonine kinase receptor-associated protein	ko03013	Nucleocytoplasmic transport
Bm010015	K03039	PSMD13, RPN9; 26S proteasome regulatory subunit N9	ko03050	Proteasome
Bm010023	K01892	HARS, hisS; histidyl-tRNA synthetase [EC:6.1.1.21]	ko00970	Aminoacyl-tRNA biosynthesis
Bm010025	K03039	PSMD13, RPN9; 26S proteasome regulatory subunit N9	ko03050	Proteasome
Bm010026	K09843	CYP707A; (+)-abscisic acid 8'-hydroxylase [EC:1.14.14.137]	ko00906	Carotenoid biosynthesis
Bm010028	K03039	PSMD13, RPN9; 26S proteasome regulatory subunit N9	ko03050	Proteasome
Bm010040	K02936	RP-L7Ae, RPL7A; large subunit ribosomal protein L7Ae	ko03010	Ribosome
Bm010047	K08908	LHCA2; light-harvesting complex I chlorophyll a/b binding protein 2	ko00196	Photosynthesis - antenna proteins
Bm010053	K01648	ACLY; ATP citrate (pro-S)-lyase [EC:2.3.3.8]	ko00020	Citrate cycle
Bm010067	K08739	MLH3; DNA mismatch repair protein MLH3	ko03430	Mismatch repair
Bm010073	K11262	ACACA; acetyl-CoA carboxylase / biotin carboxylase 1 [EC:6.4.1.2 6.3.4.14 2.1.3.15]	ko00261	Monobactam biosynthesis
Bm010099	K07375	TUBB; tubulin beta	ko04145	Phagosome
Bm010100	K07375	TUBB; tubulin beta	ko04145	Phagosome
Bm010108	K02937	RP-L7e, RPL7; large subunit ribosomal protein L7e	ko03010	Ribosome
Bm010117	K02937	RP-L7e, RPL7; large subunit ribosomal protein L7e	ko03010	Ribosome
Bm010123	K14005	SEC31; protein transport protein SEC31	ko04141	Protein processing in endoplasmic reticulum
Bm010127	K12129	PRR7; pseudo-response regulator 7	ko04712	Circadian rhythm - plant
Bm010128	K02736	PSMB4; 20S proteasome subunit beta 7 [EC:3.4.25.1]	ko03050	Proteasome
Bm010130	K12129	PRR7; pseudo-response regulator 7	ko04712	Circadian rhythm - plant
Bm010133	K02146	ATPeV0D, ATP6D; V-type H+-transporting ATPase subunit d	ko04145	Phagosome
Bm010138	K06063	SNW1, SKIIP, SKIP; SNW domain-containing protein 1	ko03040	Spliceosome
Bm010145	K09584	PDIA6, TXNDC7; protein disulfide-isomerase A6 [EC:5.3.4.1]	ko04141	Protein processing in endoplasmic reticulum
Bm010158	K02993	RP-S7e, RPS7; small subunit ribosomal protein S7e	ko03010	Ribosome
Bm010164	K01883	CARS, cysS; cysteinyl-tRNA synthetase [EC:6.1.1.16]	ko00970	Aminoacyl-tRNA biosynthesis
Bm010171	K03002	RPA2, POLR1B; DNA-directed RNA polymerase I subunit RPA2 [EC:2.7.7.6]	ko03020	RNA polymerase
Bm010172	K00382	DLD, lpd, pdhD; dihydrolipoyl dehydrogenase [EC:1.8.1.4]	ko00260	Glycine, serine and threonine metabolism
Bm010188	K00021	HMGCR; hydroxymethylglutaryl-CoA reductase (NADPH) [EC:1.1.1.34]	ko00900	Terpenoid backbone biosynthesis
Bm010189	K00021	HMGCR; hydroxymethylglutaryl-CoA reductase (NADPH) [EC:1.1.1.34]	ko00900	Terpenoid backbone biosynthesis
Bm010192	K09478	ACADSB; short-chain 2-methylacyl-CoA dehydrogenase [EC:1.3.8.5]	ko00280	Valine, leucine and isoleucine degradation
Bm010193	K00253	IVD, ivd; isovaleryl-CoA dehydrogenase [EC:1.3.8.4]	ko00280	Valine, leucine and isoleucine degradation
Bm010194	K02995	RP-S8e, RPS8; small subunit ribosomal protein S8e	ko03010	Ribosome
Bm010195	K00253	IVD, ivd; isovaleryl-CoA dehydrogenase [EC:1.3.8.4]	ko00280	Valine, leucine and isoleucine degradation
Bm010203	K01637	E4.1.3.1, aceA; isocitrate lyase [EC:4.1.3.1]	ko00630	Glyoxylate and dicarboxylate metabolism
Bm010215	K02693	psaE; photosystem I subunit IV	ko00195	Photosynthesis
Bm010217	K02721	psbW; photosystem II PsbW protein	ko00195	Photosynthesis
Bm010236	K03841	FBP, fbp; fructose-1,6-bisphosphatase I [EC:3.1.3.11]	ko00010	Glycolysis / Gluconeogenesis
Bm010246	K01937	pyrG, CTPS; CTP synthase [EC:6.3.4.2]	ko00240	Pyrimidine metabolism
Bm010249	K12581	CNOT7_8, CAF1, POP2; CCR4-NOT transcription complex subunit 7/8	ko03018	RNA degradation
Bm010251	K03251	EIF3D; translation initiation factor 3 subunit D	ko03013	Nucleocytoplasmic transport
Bm010268	K09832	CYP710A; sterol 22-desaturase [EC:1.14.19.41]	ko00100	Steroid biosynthesis
Bm010284	K00318	PRODH, fadM, putB; proline dehydrogenase [EC:1.5.5.2]	ko00330	Arginine and proline metabolism
Bm010286	K01792	E5.1.3.15; glucose-6-phosphate 1-epimerase [EC:5.1.3.15]	ko00010	Glycolysis / Gluconeogenesis
Bm010297	K03064	PSMC6, RPT4; 26S proteasome regulatory subunit T4	ko03050	Proteasome
Bm010300	K01649	leuA, IMS; 2-isopropylmalate synthase [EC:2.3.3.13]	ko00290	Valine, leucine and isoleucine biosynthesis
Bm010301	K04487	iscS, NFS1; cysteine desulfurase [EC:2.8.1.7]	ko04122	Sulfur relay system
Bm010311	K02136	ATPeF1G, ATP5C1, ATP3; F-type H+-transporting ATPase subunit gamma	ko00190	Oxidative phosphorylation
Bm010316	K02984	RP-S3Ae, RPS3A; small subunit ribosomal protein S3Ae	ko03010	Ribosome
Bm010319	K02984	RP-S3Ae, RPS3A; small subunit ribosomal protein S3Ae	ko03010	Ribosome
Bm010322	K12741	HNRNPA1_3; heterogeneous nuclear ribonucleoprotein A1/A3	ko03040	Spliceosome
Bm010331	K00844	HK; hexokinase [EC:2.7.1.1]	ko00261	Monobactam biosynthesis
Bm010337	K05674	ABCC10; ATP-binding cassette, subfamily C (CFTR/MRP), member 10	ko02010	ABC transporters
Bm010342	K00981	E2.7.7.41, CDS1, CDS2, cdsA; phosphatidate cytidylyltransferase [EC:2.7.7.41]	ko04070	Phosphatidylinositol signaling system
Bm010347	K09487	HSP90B, TRA1; heat shock protein 90kDa beta	ko04141	Protein processing in endoplasmic reticulum
Bm010373	K13126	PABPC; polyadenylate-binding protein	ko03018	RNA degradation
Bm010374	K07342	SEC61G, SSS1, secE; protein transport protein SEC61 subunit gamma and related proteins	ko04145	Phagosome
Bm010380	K02872	RP-L13Ae, RPL13A; large subunit ribosomal protein L13Ae	ko03010	Ribosome
Bm010381	K12828	SF3B1, SAP155; splicing factor 3B subunit 1	ko03040	Spliceosome
Bm010385	K14488	SAUR; SAUR family protein	ko04075	Plant hormone signal transduction
Bm010403	K00700	GBE1, glgB; 1,4-alpha-glucan branching enzyme [EC:2.4.1.18]	ko00500	Starch and sucrose metabolism
Bm010407	K12524	thrA; bifunctional aspartokinase / homoserine dehydrogenase 1 [EC:2.7.2.4 1.1.1.3]	ko00260	Glycine, serine and threonine metabolism
Bm010420	K12617	PATL1, PAT1; DNA topoisomerase 2-associated protein PAT1	ko03018	RNA degradation
Bm010423	K10839	RAD23, HR23; UV excision repair protein RAD23	ko04141	Protein processing in endoplasmic reticulum
Bm010424	K12741	HNRNPA1_3; heterogeneous nuclear ribonucleoprotein A1/A3	ko03040	Spliceosome
Bm010425	K09422	MYBP; transcription factor MYB, plant	ko04626	Plant-pathogen interaction
Bm010426	K13427	NOA1; nitric-oxide synthase, plant [EC:1.14.13.39]	ko00220	Arginine biosynthesis
Bm010427	K12741	HNRNPA1_3; heterogeneous nuclear ribonucleoprotein A1/A3	ko03040	Spliceosome
Bm010429	K02952	RP-S13, rpsM; small subunit ribosomal protein S13	ko03010	Ribosome
Bm010435	K13024	PPIP5K, VIP; inositol-hexakisphosphate/diphosphoinositol-pentakisphosphate 1-kinase [EC:2.7.4.24]	ko04070	Phosphatidylinositol signaling system
Bm010439	K13448	CML; calcium-binding protein CML	ko04626	Plant-pathogen interaction
Bm010440	K13448	CML; calcium-binding protein CML	ko04626	Plant-pathogen interaction
Bm010445	K11131	DKC1, NOLA4, CBF5; H/ACA ribonucleoprotein complex subunit 4 [EC:5.4.99.-]	ko03008	Ribosome biogenesis in eukaryotes
Bm010447	K01951	guaA, GMPS; GMP synthase (glutamine-hydrolysing) [EC:6.3.5.2]	ko00230	Purine metabolism
Bm010464	K16196	EIF2AK4; eukaryotic translation initiation factor 2-alpha kinase 4 [EC:2.7.11.1]	ko04141	Protein processing in endoplasmic reticulum
Bm010465	K16196	EIF2AK4; eukaryotic translation initiation factor 2-alpha kinase 4 [EC:2.7.11.1]	ko04141	Protein processing in endoplasmic reticulum
Bm010471	K12896	SRSF7, SFRS7; serine/arginine-rich splicing factor 7	ko03040	Spliceosome
Bm010484	K00919	ispE; 4-diphosphocytidyl-2-C-methyl-D-erythritol kinase [EC:2.7.1.148]	ko00900	Terpenoid backbone biosynthesis
Bm010486	K12640	CYP85A2, BR6OX2; brassinosteroid 6-oxygenase / brassinolide synthase [EC:1.14.14.179 1.14.14.180]	ko00905	Brassinosteroid biosynthesis
Bm010489	K12640	CYP85A2, BR6OX2; brassinosteroid 6-oxygenase / brassinolide synthase [EC:1.14.14.179 1.14.14.180]	ko00905	Brassinosteroid biosynthesis
Bm010491	K17991	PXG; peroxygenase [EC:1.11.2.3]	ko00073	Cutin, suberine and wax biosynthesis
Bm010492	K00559	SMT1, ERG6; sterol 24-C-methyltransferase [EC:2.1.1.41]	ko00100	Steroid biosynthesis
Bm010503	K05305	FUK; fucokinase [EC:2.7.1.52]	ko00051	Fructose and mannose metabolism
Bm010506	K03364	CDH1, FZR1; cell division cycle 20-like protein 1, cofactor of APC complex	ko04120	Ubiquitin mediated proteolysis
Bm010507	K18826	CAMKMT; calmodulin-lysine N-methyltransferase [EC:2.1.1.60]	ko00310	Lysine degradation
Bm010508	K18826	CAMKMT; calmodulin-lysine N-methyltransferase [EC:2.1.1.60]	ko00310	Lysine degradation
Bm010510	K00648	fabH; 3-oxoacyl-[acyl-carrier-protein] synthase III [EC:2.3.1.180]	ko00061	Fatty acid biosynthesis
Bm010513	K16054	DEP1; methylthioribulose 1-phosphate dehydratase / enolase-phosphatase E1 [EC:4.2.1.109 3.1.3.77]	ko00270	Cysteine and methionine metabolism
Bm010514	K16054	DEP1; methylthioribulose 1-phosphate dehydratase / enolase-phosphatase E1 [EC:4.2.1.109 3.1.3.77]	ko00270	Cysteine and methionine metabolism
Bm010519	K01100	E3.1.3.37; sedoheptulose-bisphosphatase [EC:3.1.3.37]	ko00710	Carbon fixation in photosynthetic organisms
Bm010520	K01100	E3.1.3.37; sedoheptulose-bisphosphatase [EC:3.1.3.37]	ko00710	Carbon fixation in photosynthetic organisms
Bm010521	K12821	PRPF40, PRP40; pre-mRNA-processing factor 40	ko03040	Spliceosome
Bm010525	K08057	CALR; calreticulin	ko04145	Phagosome
Bm010533	K03652	MPG; DNA-3-methyladenine glycosylase [EC:3.2.2.21]	ko03410	Base excision repair
Bm010551	K02738	PSMB6; 20S proteasome subunit beta 1 [EC:3.4.25.1]	ko03050	Proteasome
Bm010554	K09490	HSPA5, BIP; endoplasmic reticulum chaperone BiP [EC:3.6.4.10]	ko03060	Protein export
Bm010563	K00033	PGD, gnd, gntZ; 6-phosphogluconate dehydrogenase [EC:1.1.1.44 1.1.1.343]	ko00030	Pentose phosphate pathway
Bm010605	K03017	RPB9, POLR2I; DNA-directed RNA polymerase II subunit RPB9	ko03020	RNA polymerase
Bm010607	K02910	RP-L31e, RPL31; large subunit ribosomal protein L31e	ko03010	Ribosome
Bm010610	K01610	pckA; phosphoenolpyruvate carboxykinase (ATP) [EC:4.1.1.49]	ko00010	Glycolysis / Gluconeogenesis
Bm010634	K01958	PC, pyc; pyruvate carboxylase [EC:6.4.1.1]	ko00020	Citrate cycle
Bm010642	K15013	ACSBG; long-chain-fatty-acid--CoA ligase ACSBG [EC:6.2.1.3]	ko00061	Fatty acid biosynthesis
Bm010646	K01961	accC; acetyl-CoA carboxylase, biotin carboxylase subunit [EC:6.4.1.2 6.3.4.14]	ko00620	Pyruvate metabolism
Bm010662	K00432	gpx, btuE, bsaA; glutathione peroxidase [EC:1.11.1.9]	ko00590	Arachidonic acid metabolism
Bm010671	K01113	phoD; alkaline phosphatase D [EC:3.1.3.1]	ko00790	Folate biosynthesis
Bm010675	K10839	RAD23, HR23; UV excision repair protein RAD23	ko04141	Protein processing in endoplasmic reticulum
Bm010679	K04710	CERS1, LASS1; sphingoid base N-stearoyltransferase [EC:2.3.1.299]	ko00600	Sphingolipid metabolism
Bm010702	K00036	G6PD, zwf; glucose-6-phosphate 1-dehydrogenase [EC:1.1.1.49 1.1.1.363]	ko00030	Pentose phosphate pathway
Bm010712	K15919	HPR2_3; glyoxylate/hydroxypyruvate reductase [EC:1.1.1.79 1.1.1.81]	ko00260	Glycine, serine and threonine metabolism
Bm010713	K12604	CNOT1, NOT1; CCR4-NOT transcription complex subunit 1	ko03018	RNA degradation
Bm010721	K00789	metK, MAT; S-adenosylmethionine synthetase [EC:2.5.1.6]	ko00270	Cysteine and methionine metabolism
Bm010723	K04079	HSP90A, htpG; molecular chaperone HtpG	ko04141	Protein processing in endoplasmic reticulum
Bm010737	K05658	ABCB1, CD243; ATP-binding cassette, subfamily B (MDR/TAP), member 1 [EC:7.6.2.2]	ko02010	ABC transporters
Bm010741	K10885	XRCC5, KU80, G22P2; ATP-dependent DNA helicase 2 subunit 2	ko03450	Non-homologous end-joining
Bm010743	K05658	ABCB1, CD243; ATP-binding cassette, subfamily B (MDR/TAP), member 1 [EC:7.6.2.2]	ko02010	ABC transporters
Bm010744	K10578	UBE2J1, NCUBE1, UBC6; ubiquitin-conjugating enzyme E2 J1 [EC:2.3.2.23]	ko04120	Ubiquitin mediated proteolysis
Bm010749	K03809	wrbA; NAD(P)H dehydrogenase (quinone) [EC:1.6.5.2]	ko00130	Ubiquinone and other terpenoid-quinone biosynthesis
Bm010761	K04506	SIAH1; E3 ubiquitin-protein ligase SIAH1 [EC:2.3.2.27]	ko04120	Ubiquitin mediated proteolysis
Bm010768	K02917	RP-L35Ae, RPL35A; large subunit ribosomal protein L35Ae	ko03010	Ribosome
Bm010772	K14016	UFD1; ubiquitin fusion degradation protein 1	ko04141	Protein processing in endoplasmic reticulum
Bm010775	K01456	E3.5.1.52, NGLY1, PNG1; peptide-N4-(N-acetyl-beta-glucosaminyl)asparagine amidase [EC:3.5.1.52]	ko04141	Protein processing in endoplasmic reticulum
Bm010778	K02945	RP-S1, rpsA; small subunit ribosomal protein S1	ko03010	Ribosome
Bm010781	K12741	HNRNPA1_3; heterogeneous nuclear ribonucleoprotein A1/A3	ko03040	Spliceosome
Bm010787	K02991	RP-S6e, RPS6; small subunit ribosomal protein S6e	ko03010	Ribosome
Bm010791	K14404	CPSF4, YTH1; cleavage and polyadenylation specificity factor subunit 4	ko03015	mRNA surveillance pathway
Bm010792	K02872	RP-L13Ae, RPL13A; large subunit ribosomal protein L13Ae	ko03010	Ribosome
Bm010797	K11752	ribD; diaminohydroxyphosphoribosylaminopyrimidine deaminase / 5-amino-6-(5-phosphoribosylamino)uracil reductase [EC:3.5.4.26 1.1.1.193]	ko00740	Riboflavin metabolism
Bm010798	K07964	HPSE; heparanase [EC:3.2.1.166]	ko00531	Glycosaminoglycan degradation
Bm010800	K00626	ACAT, atoB; acetyl-CoA C-acetyltransferase [EC:2.3.1.9]	ko00280	Valine, leucine and isoleucine degradation
Bm010807	K07375	TUBB; tubulin beta	ko04145	Phagosome
Bm010817	K00029	maeB; malate dehydrogenase (oxaloacetate-decarboxylating)(NADP+) [EC:1.1.1.40]	ko00620	Pyruvate metabolism
Bm010818	K00029	maeB; malate dehydrogenase (oxaloacetate-decarboxylating)(NADP+) [EC:1.1.1.40]	ko00620	Pyruvate metabolism
Bm010819	K00029	maeB; malate dehydrogenase (oxaloacetate-decarboxylating)(NADP+) [EC:1.1.1.40]	ko00620	Pyruvate metabolism
Bm010820	K00029	maeB; malate dehydrogenase (oxaloacetate-decarboxylating)(NADP+) [EC:1.1.1.40]	ko00620	Pyruvate metabolism
Bm010821	K00029	maeB; malate dehydrogenase (oxaloacetate-decarboxylating)(NADP+) [EC:1.1.1.40]	ko00620	Pyruvate metabolism
Bm010828	K00600	glyA, SHMT; glycine hydroxymethyltransferase [EC:2.1.2.1]	ko00260	Glycine, serine and threonine metabolism
Bm010830	K00600	glyA, SHMT; glycine hydroxymethyltransferase [EC:2.1.2.1]	ko00260	Glycine, serine and threonine metabolism
Bm010836	K12599	SKI2, SKIV2L; antiviral helicase SKI2 [EC:3.6.4.13]	ko03018	RNA degradation
Bm010837	K01251	AHCY, ahcY; adenosylhomocysteinase [EC:3.13.2.1]	ko00270	Cysteine and methionine metabolism
Bm010843	K00930	argB; acetylglutamate kinase [EC:2.7.2.8]	ko00220	Arginine biosynthesis
Bm010844	K10084	EDEM1; ER degradation enhancer, mannosidase alpha-like 1	ko04141	Protein processing in endoplasmic reticulum
Bm010845	K11826	AP2M1; AP-2 complex subunit mu-1	ko04144	Endocytosis
Bm010851	K00134	GAPDH, gapA; glyceraldehyde 3-phosphate dehydrogenase (phosphorylating) [EC:1.2.1.12]	ko00010	Glycolysis / Gluconeogenesis
Bm010858	K00232	E1.3.3.6, ACOX1, ACOX3; acyl-CoA oxidase [EC:1.3.3.6]	ko04146	Peroxisome
Bm010861	K04077	groEL, HSPD1; chaperonin GroEL [EC:5.6.1.7]	ko03018	RNA degradation
Bm010862	K04077	groEL, HSPD1; chaperonin GroEL [EC:5.6.1.7]	ko03018	RNA degradation
Bm010867	K01803	TPI, tpiA; triosephosphate isomerase (TIM) [EC:5.3.1.1]	ko00010	Glycolysis / Gluconeogenesis
Bm010874	K01899	LSC1; succinyl-CoA synthetase alpha subunit [EC:6.2.1.4 6.2.1.5]	ko00020	Citrate cycle
Bm010876	K10688	UBE2W, UBC16; ubiquitin-conjugating enzyme E2 W [EC:2.3.2.25]	ko04120	Ubiquitin mediated proteolysis
Bm010877	K12867	SYF1, XAB2; pre-mRNA-splicing factor SYF1	ko03040	Spliceosome
Bm010887	K02437	gcvH, GCSH; glycine cleavage system H protein	ko00260	Glycine, serine and threonine metabolism
Bm010893	K03231	EEF1A; elongation factor 1-alpha	ko03013	Nucleocytoplasmic transport
Bm010899	K13508	GPAT; glycerol-3-phosphate acyltransferase [EC:2.3.1.15 2.3.1.198]	ko00561	Glycerolipid metabolism
Bm010902	K12813	DHX16; pre-mRNA-splicing factor ATP-dependent RNA helicase DHX16 [EC:3.6.4.13]	ko03040	Spliceosome
Bm010904	K00975	glgC; glucose-1-phosphate adenylyltransferase [EC:2.7.7.27]	ko00500	Starch and sucrose metabolism
Bm010912	K13249	SSR1; translocon-associated protein subunit alpha	ko04141	Protein processing in endoplasmic reticulum
Bm010914	K02993	RP-S7e, RPS7; small subunit ribosomal protein S7e	ko03010	Ribosome
Bm010933	K02437	gcvH, GCSH; glycine cleavage system H protein	ko00260	Glycine, serine and threonine metabolism
Bm010937	K02938	RP-L8e, RPL8; large subunit ribosomal protein L8e	ko03010	Ribosome
Bm010954	K00819	rocD, OAT; ornithine--oxo-acid transaminase [EC:2.6.1.13]	ko00330	Arginine and proline metabolism
Bm010955	K04392	RAC1; Ras-related C3 botulinum toxin substrate 1	ko04145	Phagosome
Bm010981	K02865	RP-L10Ae, RPL10A; large subunit ribosomal protein L10Ae	ko03010	Ribosome
Bm010998	K06943	NOG1; nucleolar GTP-binding protein	ko03008	Ribosome biogenesis in eukaryotes
Bm011019	K02727	PSMA3; 20S proteasome subunit alpha 7 [EC:3.4.25.1]	ko03050	Proteasome
Bm011027	K07151	STT3; dolichyl-diphosphooligosaccharide---protein glycosyltransferase [EC:2.4.99.18]	ko04141	Protein processing in endoplasmic reticulum
Bm011074	K05665	ABCC1; ATP-binding cassette, subfamily C (CFTR/MRP), member 1 [EC:7.6.2.3]	ko02010	ABC transporters
Bm011078	K02966	RP-S19e, RPS19; small subunit ribosomal protein S19e	ko03010	Ribosome
Bm011080	K10592	HUWE1, MULE, ARF-BP1, TOM1; E3 ubiquitin-protein ligase HUWE1 [EC:2.3.2.26]	ko04120	Ubiquitin mediated proteolysis
Bm011105	K13989	DERL2_3; Derlin-2/3	ko04141	Protein processing in endoplasmic reticulum
Bm011106	K13989	DERL2_3; Derlin-2/3	ko04141	Protein processing in endoplasmic reticulum
Bm011131	K04649	UBE2K, HIP2, UBC1; ubiquitin-conjugating enzyme (huntingtin interacting protein 2) [EC:2.3.2.23]	ko04120	Ubiquitin mediated proteolysis
Bm011132	K10526	OPCL1; OPC-8:0 CoA ligase 1 [EC:6.2.1.-]	ko00592	alpha-Linolenic acid metabolism
Bm011133	K00232	E1.3.3.6, ACOX1, ACOX3; acyl-CoA oxidase [EC:1.3.3.6]	ko04146	Peroxisome
Bm011134	K04649	UBE2K, HIP2, UBC1; ubiquitin-conjugating enzyme (huntingtin interacting protein 2) [EC:2.3.2.23]	ko04120	Ubiquitin mediated proteolysis
Bm011135	K12843	PRPF3, PRP3; U4/U6 small nuclear ribonucleoprotein PRP3	ko03040	Spliceosome
Bm011158	K02183	CALM; calmodulin	ko04070	Phosphatidylinositol signaling system
Bm011164	K12309	GLB1, ELNR1; beta-galactosidase [EC:3.2.1.23]	ko00052	Galactose metabolism
Bm011170	K01510	ENTPD1_3_8, CD39; apyrase [EC:3.6.1.5]	ko00230	Purine metabolism
Bm011171	K01648	ACLY; ATP citrate (pro-S)-lyase [EC:2.3.3.8]	ko00020	Citrate cycle
Bm011172	K00815	TAT; tyrosine aminotransferase [EC:2.6.1.5]	ko00270	Cysteine and methionine metabolism
Bm011175	K02990	RP-S6, MRPS6, rpsF; small subunit ribosomal protein S6	ko03010	Ribosome
Bm011179	K03635	MOCS2B, moaE; molybdopterin synthase catalytic subunit [EC:2.8.1.12]	ko04122	Sulfur relay system
Bm011199	K07198	PRKAA, AMPK; 5'-AMP-activated protein kinase, catalytic alpha subunit [EC:2.7.11.31]	ko04140	Autophagy - animal
Bm011218	K14292	TGS1; trimethylguanosine synthase [EC:2.1.1.-]	ko03013	Nucleocytoplasmic transport
Bm011220	K14292	TGS1; trimethylguanosine synthase [EC:2.1.1.-]	ko03013	Nucleocytoplasmic transport
Bm011221	K14292	TGS1; trimethylguanosine synthase [EC:2.1.1.-]	ko03013	Nucleocytoplasmic transport
Bm011223	K14292	TGS1; trimethylguanosine synthase [EC:2.1.1.-]	ko03013	Nucleocytoplasmic transport
Bm011224	K00975	glgC; glucose-1-phosphate adenylyltransferase [EC:2.7.7.27]	ko00500	Starch and sucrose metabolism
Bm011227	K02880	RP-L17e, RPL17; large subunit ribosomal protein L17e	ko03010	Ribosome
Bm011237	K01637	E4.1.3.1, aceA; isocitrate lyase [EC:4.1.3.1]	ko00630	Glyoxylate and dicarboxylate metabolism
Bm011238	K01637	E4.1.3.1, aceA; isocitrate lyase [EC:4.1.3.1]	ko00630	Glyoxylate and dicarboxylate metabolism
Bm011240	K01637	E4.1.3.1, aceA; isocitrate lyase [EC:4.1.3.1]	ko00630	Glyoxylate and dicarboxylate metabolism
Bm011243	K14760	AAE14; o-succinylbenzoate---CoA ligase [EC:6.2.1.26]	ko00130	Ubiquinone and other terpenoid-quinone biosynthesis
Bm011244	K14760	AAE14; o-succinylbenzoate---CoA ligase [EC:6.2.1.26]	ko00130	Ubiquinone and other terpenoid-quinone biosynthesis
Bm011245	K14760	AAE14; o-succinylbenzoate---CoA ligase [EC:6.2.1.26]	ko00130	Ubiquinone and other terpenoid-quinone biosynthesis
Bm011247	K01897	ACSL, fadD; long-chain acyl-CoA synthetase [EC:6.2.1.3]	ko04146	Peroxisome
Bm011252	K03639	moaA, CNX2; GTP 3',8-cyclase [EC:4.1.99.22]	ko04122	Sulfur relay system
Bm011256	K13459	RPS2; disease resistance protein RPS2	ko04626	Plant-pathogen interaction
Bm011268	K01897	ACSL, fadD; long-chain acyl-CoA synthetase [EC:6.2.1.3]	ko04146	Peroxisome
Bm011284	K10576	UBE2H, UBC8; ubiquitin-conjugating enzyme E2 H [EC:2.3.2.23]	ko04120	Ubiquitin mediated proteolysis
Bm011289	K14156	CHK; choline/ethanolamine kinase [EC:2.7.1.32 2.7.1.82]	ko00564	Glycerophospholipid metabolism
Bm011295	K01637	E4.1.3.1, aceA; isocitrate lyase [EC:4.1.3.1]	ko00630	Glyoxylate and dicarboxylate metabolism
Bm011297	K13459	RPS2; disease resistance protein RPS2	ko04626	Plant-pathogen interaction
Bm011300	K13414	MEKK1; mitogen-activated protein kinase kinase kinase 1 [EC:2.7.11.25]	ko04626	Plant-pathogen interaction
Bm011311	K09753	CCR; cinnamoyl-CoA reductase [EC:1.2.1.44]	ko00940	Phenylpropanoid biosynthesis
Bm011323	K12830	SF3B3, SAP130, RSE1; splicing factor 3B subunit 3	ko03040	Spliceosome
Bm011324	K08679	GAE, cap1J; UDP-glucuronate 4-epimerase [EC:5.1.3.6]	ko00500	Starch and sucrose metabolism
Bm011325	K00392	sir; sulfite reductase (ferredoxin) [EC:1.8.7.1]	ko00920	Sulfur metabolism
Bm011337	K14290	XPO1, CRM1; exportin-1	ko03008	Ribosome biogenesis in eukaryotes
Bm011338	K01958	PC, pyc; pyruvate carboxylase [EC:6.4.1.1]	ko00020	Citrate cycle
Bm011342	K00145	argC; N-acetyl-gamma-glutamyl-phosphate reductase [EC:1.2.1.38]	ko00220	Arginine biosynthesis
Bm011344	K13126	PABPC; polyadenylate-binding protein	ko03018	RNA degradation
Bm011346	K01792	E5.1.3.15; glucose-6-phosphate 1-epimerase [EC:5.1.3.15]	ko00010	Glycolysis / Gluconeogenesis
Bm011367	K13448	CML; calcium-binding protein CML	ko04626	Plant-pathogen interaction
Bm011378	K02736	PSMB4; 20S proteasome subunit beta 7 [EC:3.4.25.1]	ko03050	Proteasome
Bm011386	K04646	CLTC; clathrin heavy chain	ko04144	Endocytosis
Bm011390	K13606	NOL, NYC1; chlorophyll(ide) b reductase [EC:1.1.1.294]	ko00860	Porphyrin metabolism
Bm011398	K04354	PPP2R2; serine/threonine-protein phosphatase 2A regulatory subunit B	ko03015	mRNA surveillance pathway
Bm011399	K02925	RP-L3e, RPL3; large subunit ribosomal protein L3e	ko03010	Ribosome
Bm011406	K01783	rpe, RPE; ribulose-phosphate 3-epimerase [EC:5.1.3.1]	ko00030	Pentose phosphate pathway
Bm011411	K09490	HSPA5, BIP; endoplasmic reticulum chaperone BiP [EC:3.6.4.10]	ko03060	Protein export
Bm011420	K01177	E3.2.1.2; beta-amylase [EC:3.2.1.2]	ko00500	Starch and sucrose metabolism
Bm011427	K00469	MIOX; inositol oxygenase [EC:1.13.99.1]	ko00053	Ascorbate and aldarate metabolism
Bm011429	K12188	SNF8, EAP30; ESCRT-II complex subunit VPS22	ko04144	Endocytosis
Bm011438	K13993	HSP20; HSP20 family protein	ko04141	Protein processing in endoplasmic reticulum
Bm011444	K13993	HSP20; HSP20 family protein	ko04141	Protein processing in endoplasmic reticulum
Bm011452	K02997	RP-S9e, RPS9; small subunit ribosomal protein S9e	ko03010	Ribosome
Bm011457	K03250	EIF3E, INT6; translation initiation factor 3 subunit E	ko03013	Nucleocytoplasmic transport
Bm011464	K10869	RAD51L1, RAD51B; RAD51-like protein 1	ko03440	Homologous recombination
Bm011466	K09503	DNAJA2; DnaJ homolog subfamily A member 2	ko04141	Protein processing in endoplasmic reticulum
Bm011467	K09503	DNAJA2; DnaJ homolog subfamily A member 2	ko04141	Protein processing in endoplasmic reticulum
Bm011469	K07542	PIGV; GPI mannosyltransferase 2 [EC:2.4.1.-]	ko00563	Glycosylphosphatidylinositol
Bm011474	K13064	PTAL; phenylalanine/tyrosine ammonia-lyase [EC:4.3.1.25]	ko00360	Phenylalanine metabolism
Bm011479	K13648	GAUT; alpha-1,4-galacturonosyltransferase [EC:2.4.1.43]	ko00500	Starch and sucrose metabolism
Bm011493	K00029	maeB; malate dehydrogenase (oxaloacetate-decarboxylating)(NADP+) [EC:1.1.1.40]	ko00620	Pyruvate metabolism
Bm011511	K03514	PAPD5_7, TRF4; non-canonical poly(A) RNA polymerase PAPD5/7 [EC:2.7.7.19]	ko03018	RNA degradation
Bm011517	K09587	CYP90B, DWF4; steroid 22S-hydroxylase [EC:1.14.14.178]	ko00905	Brassinosteroid biosynthesis
Bm011522	K14493	GID1; gibberellin receptor GID1 [EC:3.-.-.-]	ko04075	Plant hormone signal transduction
Bm011527	K02990	RP-S6, MRPS6, rpsF; small subunit ribosomal protein S6	ko03010	Ribosome
Bm011535	K02730	PSMA6; 20S proteasome subunit alpha 1 [EC:3.4.25.1]	ko03050	Proteasome
Bm011569	K03260	EIF4G; translation initiation factor 4G	ko03013	Nucleocytoplasmic transport
Bm011573	K12319	GUCY1B; guanylate cyclase soluble subunit beta [EC:4.6.1.2]	ko00230	Purine metabolism
Bm011588	K12580	CNOT3, NOT3; CCR4-NOT transcription complex subunit 3	ko03018	RNA degradation
Bm011602	K06689	UBE2D, UBC4, UBC5; ubiquitin-conjugating enzyme E2 D [EC:2.3.2.23]	ko04120	Ubiquitin mediated proteolysis
Bm011606	K13249	SSR1; translocon-associated protein subunit alpha	ko04141	Protein processing in endoplasmic reticulum
Bm011607	K00232	E1.3.3.6, ACOX1, ACOX3; acyl-CoA oxidase [EC:1.3.3.6]	ko04146	Peroxisome
Bm011611	K06699	PSME4; proteasome activator subunit 4	ko03050	Proteasome
Bm011613	K13126	PABPC; polyadenylate-binding protein	ko03018	RNA degradation
Bm011617	K05758	ARPC2; actin related protein 2/3 complex, subunit 2	ko04144	Endocytosis
Bm011640	K10144	RCHY1, PIRH2; RING finger and CHY zinc finger domain-containing protein 1 [EC:2.3.2.27]	ko04120	Ubiquitin mediated proteolysis
Bm011643	K13525	VCP, CDC48; transitional endoplasmic reticulum ATPase	ko04141	Protein processing in endoplasmic reticulum
Bm011644	K13525	VCP, CDC48; transitional endoplasmic reticulum ATPase	ko04141	Protein processing in endoplasmic reticulum
Bm011649	K13525	VCP, CDC48; transitional endoplasmic reticulum ATPase	ko04141	Protein processing in endoplasmic reticulum
Bm011657	K00083	CAD; cinnamyl-alcohol dehydrogenase [EC:1.1.1.195]	ko00940	Phenylpropanoid biosynthesis
Bm011658	K05933	E1.14.17.4; aminocyclopropanecarboxylate oxidase [EC:1.14.17.4]	ko00270	Cysteine and methionine metabolism
Bm011660	K12183	TSG101, STP22, VPS23; ESCRT-I complex subunit TSG101	ko04144	Endocytosis
Bm011661	K13448	CML; calcium-binding protein CML	ko04626	Plant-pathogen interaction
Bm011662	K19366	SPG20; spartin	ko04144	Endocytosis
Bm011664	K01807	rpiA; ribose 5-phosphate isomerase A [EC:5.3.1.6]	ko00030	Pentose phosphate pathway
Bm011666	K00565	RNMT; mRNA (guanine-N7-)-methyltransferase [EC:2.1.1.56]	ko03015	mRNA surveillance pathway
Bm011682	K13339	PEX6, PXAAA1; peroxin-6	ko04146	Peroxisome
Bm011685	K13984	TXNDC5, ERP46; thioredoxin domain-containing protein 5 [EC:5.3.4.1]	ko04141	Protein processing in endoplasmic reticulum
Bm011686	K02894	RP-L23e, RPL23; large subunit ribosomal protein L23e	ko03010	Ribosome
Bm011689	K09580	PDIA1, P4HB; protein disulfide-isomerase A1 [EC:5.3.4.1]	ko04141	Protein processing in endoplasmic reticulum
Bm011696	K01711	gmd, GMDS; GDPmannose 4,6-dehydratase [EC:4.2.1.47]	ko00051	Fructose and mannose metabolism
Bm011705	K01759	GLO1, gloA; lactoylglutathione lyase [EC:4.4.1.5]	ko00620	Pyruvate metabolism
Bm011707	K02911	RP-L32, MRPL32, rpmF; large subunit ribosomal protein L32	ko03010	Ribosome
Bm011712	K12501	HST; homogentisate solanesyltransferase [EC:2.5.1.117]	ko00130	Ubiquinone and other terpenoid-quinone biosynthesis
Bm011713	K03248	EIF3G; translation initiation factor 3 subunit G	ko03013	Nucleocytoplasmic transport
Bm011724	K01956	carA, CPA1; carbamoyl-phosphate synthase small subunit [EC:6.3.5.5]	ko00250	Alanine, aspartate and glutamate metabolism
Bm011730	K02870	RP-L12e, RPL12; large subunit ribosomal protein L12e	ko03010	Ribosome
Bm011753	K13412	CPK; calcium-dependent protein kinase [EC:2.7.11.1]	ko04626	Plant-pathogen interaction
Bm011754	K11096	SNRPD2, SMD2; small nuclear ribonucleoprotein D2	ko03040	Spliceosome
Bm011772	K02868	RP-L11e, RPL11; large subunit ribosomal protein L11e	ko03010	Ribosome
Bm011776	K00236	SDHC, SDH3; succinate dehydrogenase (ubiquinone) cytochrome b560 subunit	ko00020	Citrate cycle
Bm011787	K03660	OGG1; N-glycosylase/DNA lyase [EC:3.2.2.- 4.2.99.18]	ko03410	Base excision repair
Bm011793	K01652	E2.2.1.6L, ilvB, ilvG, ilvI; acetolactate synthase I/II/III large subunit [EC:2.2.1.6]	ko00290	Valine, leucine and isoleucine biosynthesis
Bm011805	K14502	BIN2; protein brassinosteroid insensitive 2 [EC:2.7.11.1]	ko04075	Plant hormone signal transduction
Bm011810	K00858	ppnK, NADK; NAD+ kinase [EC:2.7.1.23]	ko00760	Nicotinate and nicotinamide metabolism
Bm011811	K00858	ppnK, NADK; NAD+ kinase [EC:2.7.1.23]	ko00760	Nicotinate and nicotinamide metabolism
Bm011823	K02891	RP-L22e, RPL22; large subunit ribosomal protein L22e	ko03010	Ribosome
Bm011825	K00030	IDH3; isocitrate dehydrogenase (NAD+) [EC:1.1.1.41]	ko00020	Citrate cycle
Bm011834	K02891	RP-L22e, RPL22; large subunit ribosomal protein L22e	ko03010	Ribosome
Bm011835	K00128	ALDH; aldehyde dehydrogenase (NAD+) [EC:1.2.1.3]	ko00280	Valine, leucine and isoleucine degradation
Bm011836	K03130	TAF5; transcription initiation factor TFIID subunit 5	ko03022	Basal transcription factors
Bm011838	K01783	rpe, RPE; ribulose-phosphate 3-epimerase [EC:5.1.3.1]	ko00030	Pentose phosphate pathway
Bm011846	K09503	DNAJA2; DnaJ homolog subfamily A member 2	ko04141	Protein processing in endoplasmic reticulum
Bm011849	K12451	UER1; 3,5-epimerase/4-reductase [EC:5.1.3.- 1.1.1.-]	ko00520	Amino sugar and nucleotide sugar metabolism
Bm011855	K11866	STAMBP, AMSH; STAM-binding protein [EC:3.4.19.12]	ko04144	Endocytosis
Bm011857	K09837	LUT1, CYP97C1; carotenoid epsilon hydroxylase [EC:1.14.14.158]	ko00906	Carotenoid biosynthesis
Bm011859	K01702	LEU1; 3-isopropylmalate dehydratase [EC:4.2.1.33]	ko00290	Valine, leucine and isoleucine biosynthesis
Bm011862	K03283	HSPA1_6_8; heat shock 70kDa protein 1/6/8	ko04144	Endocytosis
Bm011863	K03283	HSPA1_6_8; heat shock 70kDa protein 1/6/8	ko04144	Endocytosis
Bm011864	K12198	CHMP5, VPS60; charged multivesicular body protein 5	ko04144	Endocytosis
Bm011865	K03283	HSPA1_6_8; heat shock 70kDa protein 1/6/8	ko04144	Endocytosis
Bm011868	K14404	CPSF4, YTH1; cleavage and polyadenylation specificity factor subunit 4	ko03015	mRNA surveillance pathway
Bm011871	K01904	4CL; 4-coumarate--CoA ligase [EC:6.2.1.12]	ko00360	Phenylalanine metabolism
Bm011872	K00696	E2.4.1.14; sucrose-phosphate synthase [EC:2.4.1.14]	ko00500	Starch and sucrose metabolism
Bm011874	K03283	HSPA1_6_8; heat shock 70kDa protein 1/6/8	ko04144	Endocytosis
Bm011878	K00558	DNMT1, dcm; DNA (cytosine-5)-methyltransferase 1 [EC:2.1.1.37]	ko00270	Cysteine and methionine metabolism
Bm011887	K01070	frmB, ESD, fghA; S-formylglutathione hydrolase [EC:3.1.2.12]	ko01200	Carbon metabolism
Bm011888	K02875	RP-L14e, RPL14; large subunit ribosomal protein L14e	ko03010	Ribosome
Bm011889	K01955	carB, CPA2; carbamoyl-phosphate synthase large subunit [EC:6.3.5.5]	ko00250	Alanine, aspartate and glutamate metabolism
Bm011894	K06119	SQD2; sulfoquinovosyltransferase [EC:2.4.1.-]	ko00561	Glycerolipid metabolism
Bm011895	K08501	STX8; syntaxin 8	ko04130	SNARE interactions in vesicular transport
Bm011897	K14568	EMG1, NEP1; rRNA small subunit pseudouridine methyltransferase Nep1 [EC:2.1.1.260]	ko03008	Ribosome biogenesis in eukaryotes
Bm011907	K10661	MARCH6, DOA10; E3 ubiquitin-protein ligase MARCH6 [EC:2.3.2.27]	ko04141	Protein processing in endoplasmic reticulum
Bm011920	K01528	DNM1_3; dynamin 1/3 [EC:3.6.5.5]	ko04144	Endocytosis
Bm011925	K10601	SYVN1, HRD1; E3 ubiquitin-protein ligase synoviolin [EC:2.3.2.27]	ko04120	Ubiquitin mediated proteolysis
Bm011930	K11839	USP8, UBP5; ubiquitin carboxyl-terminal hydrolase 8 [EC:3.4.19.12]	ko04144	Endocytosis
Bm011931	K03028	PSMD2, RPN1; 26S proteasome regulatory subunit N1	ko03050	Proteasome
Bm011935	K14571	RIX7, NVL; ribosome biogenesis ATPase	ko03008	Ribosome biogenesis in eukaryotes
Bm011937	K07562	NMD3; 60S ribosomal export protein NMD3	ko03008	Ribosome biogenesis in eukaryotes
Bm011939	K11839	USP8, UBP5; ubiquitin carboxyl-terminal hydrolase 8 [EC:3.4.19.12]	ko04144	Endocytosis
Bm011968	K12823	DDX5, DBP2; ATP-dependent RNA helicase DDX5/DBP2 [EC:3.6.4.13]	ko03040	Spliceosome
Bm011977	K13447	RBOH; respiratory burst oxidase [EC:1.6.3.- 1.11.1.-]	ko04626	Plant-pathogen interaction
Bm011979	K02872	RP-L13Ae, RPL13A; large subunit ribosomal protein L13Ae	ko03010	Ribosome
Bm011987	K14571	RIX7, NVL; ribosome biogenesis ATPase	ko03008	Ribosome biogenesis in eukaryotes
Bm012000	K10956	SEC61A; protein transport protein SEC61 subunit alpha	ko04145	Phagosome
Bm012006	K01689	ENO, eno; enolase [EC:4.2.1.11]	ko03018	RNA degradation
Bm012009	K02901	RP-L27e, RPL27; large subunit ribosomal protein L27e	ko03010	Ribosome
Bm012012	K13348	MPV17; protein Mpv17	ko04146	Peroxisome
Bm012023	K10956	SEC61A; protein transport protein SEC61 subunit alpha	ko04145	Phagosome
Bm012025	K03035	PSMD12, RPN5; 26S proteasome regulatory subunit N5	ko03050	Proteasome
Bm012027	K10808	RRM2; ribonucleoside-diphosphate reductase subunit M2 [EC:1.17.4.1]	ko00480	Glutathione metabolism
Bm012028	K09832	CYP710A; sterol 22-desaturase [EC:1.14.19.41]	ko00100	Steroid biosynthesis
Bm012035	K10956	SEC61A; protein transport protein SEC61 subunit alpha	ko04145	Phagosome
Bm012049	K10580	UBE2N, BLU, UBC13; ubiquitin-conjugating enzyme E2 N [EC:2.3.2.23]	ko04120	Ubiquitin mediated proteolysis
Bm012065	K02894	RP-L23e, RPL23; large subunit ribosomal protein L23e	ko03010	Ribosome
Bm012071	K14455	GOT2; aspartate aminotransferase, mitochondrial [EC:2.6.1.1]	ko00220	Arginine biosynthesis
Bm012088	K03251	EIF3D; translation initiation factor 3 subunit D	ko03013	Nucleocytoplasmic transport
Bm012090	K00549	metE; 5-methyltetrahydropteroyltriglutamate--homocysteine methyltransferase [EC:2.1.1.14]	ko00270	Cysteine and methionine metabolism
Bm012091	K03259	EIF4E; translation initiation factor 4E	ko03013	Nucleocytoplasmic transport
Bm012102	K01736	aroC; chorismate synthase [EC:4.2.3.5]	ko00400	Phenylalanine, tyrosine and tryptophan biosynthesis
Bm012108	K01938	fhs; formate--tetrahydrofolate ligase [EC:6.3.4.3]	ko00670	One carbon pool by folate
Bm012122	K10592	HUWE1, MULE, ARF-BP1, TOM1; E3 ubiquitin-protein ligase HUWE1 [EC:2.3.2.26]	ko04120	Ubiquitin mediated proteolysis
Bm012129	K02870	RP-L12e, RPL12; large subunit ribosomal protein L12e	ko03010	Ribosome
Bm012132	K10581	UBE2O; ubiquitin-conjugating enzyme E2 O [EC:2.3.2.24]	ko04120	Ubiquitin mediated proteolysis
Bm012133	K13508	GPAT; glycerol-3-phosphate acyltransferase [EC:2.3.1.15 2.3.1.198]	ko00561	Glycerolipid metabolism
Bm012135	K12948	SPCS3, SPC3; signal peptidase complex subunit 3 [EC:3.4.-.-]	ko03060	Protein export
Bm012143	K12741	HNRNPA1_3; heterogeneous nuclear ribonucleoprotein A1/A3	ko03040	Spliceosome
Bm012151	K02325	POLE2; DNA polymerase epsilon subunit 2 [EC:2.7.7.7]	ko03030	DNA replication
Bm012152	K02685	PRI2; DNA primase large subunit	ko03030	DNA replication
Bm012157	K03062	PSMC1, RPT2; 26S proteasome regulatory subunit T2	ko03050	Proteasome
Bm012158	K12822	RBM25, S164; RNA-binding protein 25	ko03040	Spliceosome
Bm012162	K01772	hemH, FECH; protoporphyrin/coproporphyrin ferrochelatase [EC:4.98.1.1 4.99.1.9]	ko00860	Porphyrin metabolism
Bm012165	K02135	ATPeF1E, ATP5E, ATP15; F-type H+-transporting ATPase subunit epsilon	ko00190	Oxidative phosphorylation
Bm012172	K13126	PABPC; polyadenylate-binding protein	ko03018	RNA degradation
Bm012175	K03283	HSPA1_6_8; heat shock 70kDa protein 1/6/8	ko04144	Endocytosis
Bm012184	K00873	PK, pyk; pyruvate kinase [EC:2.7.1.40]	ko00010	Glycolysis / Gluconeogenesis
Bm012190	K13621	BTA1; betaine lipid synthase	ko00564	Glycerophospholipid metabolism
Bm012191	K12486	SMAP; stromal membrane-associated protein	ko04144	Endocytosis
Bm012198	K00049	GRHPR; glyoxylate/hydroxypyruvate reductase [EC:1.1.1.79 1.1.1.81]	ko00260	Glycine, serine and threonine metabolism
Bm012211	K14572	MDN1, REA1; midasin	ko03008	Ribosome biogenesis in eukaryotes
Bm012212	K14572	MDN1, REA1; midasin	ko03008	Ribosome biogenesis in eukaryotes
Bm012217	K03283	HSPA1_6_8; heat shock 70kDa protein 1/6/8	ko04144	Endocytosis
Bm012225	K11541	URA2; carbamoyl-phosphate synthase / aspartate carbamoyltransferase [EC:6.3.5.5 2.1.3.2]	ko00250	Alanine, aspartate and glutamate metabolism
Bm012226	K12449	AXS; UDP-apiose/xylose synthase	ko00520	Amino sugar and nucleotide sugar metabolism
Bm012227	K02923	RP-L38e, RPL38; large subunit ribosomal protein L38e	ko03010	Ribosome
Bm012229	K12373	HEXA_B; hexosaminidase [EC:3.2.1.52]	ko00520	Amino sugar and nucleotide sugar metabolism
Bm012230	K10661	MARCH6, DOA10; E3 ubiquitin-protein ligase MARCH6 [EC:2.3.2.27]	ko04141	Protein processing in endoplasmic reticulum
Bm012254	K12860	CDC5L, CDC5, CEF1; pre-mRNA-splicing factor CDC5/CEF1	ko03040	Spliceosome
Bm012257	K08744	CRLS; cardiolipin synthase (CMP-forming) [EC:2.7.8.41]	ko00564	Glycerophospholipid metabolism
Bm012267	K12812	DDX39B, UAP56, SUB2; ATP-dependent RNA helicase UAP56/SUB2 [EC:3.6.4.13]	ko03040	Spliceosome
Bm012268	K01580	E4.1.1.15, gadB, gadA, GAD; glutamate decarboxylase [EC:4.1.1.15]	ko00250	Alanine, aspartate and glutamate metabolism
Bm012274	K02868	RP-L11e, RPL11; large subunit ribosomal protein L11e	ko03010	Ribosome
Bm012278	K07901	RAB8A, MEL; Ras-related protein Rab-8A	ko04144	Endocytosis
Bm012283	K02920	RP-L36e, RPL36; large subunit ribosomal protein L36e	ko03010	Ribosome
Bm012292	K07897	RAB7A; Ras-related protein Rab-7A	ko04144	Endocytosis
Bm012304	K01764	HCCS; cytochrome c heme-lyase [EC:4.4.1.17]	ko00860	Porphyrin metabolism
Bm012309	K12938	GT1; anthocyanidin 5,3-O-glucosyltransferase [EC:2.4.1.-]	ko00942	Anthocyanin biosynthesis
Bm012314	K09503	DNAJA2; DnaJ homolog subfamily A member 2	ko04141	Protein processing in endoplasmic reticulum
Bm012315	K01764	HCCS; cytochrome c heme-lyase [EC:4.4.1.17]	ko00860	Porphyrin metabolism
Bm012316	K12820	DHX15, PRP43; pre-mRNA-splicing factor ATP-dependent RNA helicase DHX15/PRP43 [EC:3.6.4.13]	ko03040	Spliceosome
Bm012319	K12741	HNRNPA1_3; heterogeneous nuclear ribonucleoprotein A1/A3	ko03040	Spliceosome
Bm012320	K12885	RBMX, HNRNPG; heterogeneous nuclear ribonucleoprotein G	ko03040	Spliceosome
Bm012325	K09490	HSPA5, BIP; endoplasmic reticulum chaperone BiP [EC:3.6.4.10]	ko03060	Protein export
Bm012326	K09832	CYP710A; sterol 22-desaturase [EC:1.14.19.41]	ko00100	Steroid biosynthesis
Bm012327	K12741	HNRNPA1_3; heterogeneous nuclear ribonucleoprotein A1/A3	ko03040	Spliceosome
Bm012338	K09490	HSPA5, BIP; endoplasmic reticulum chaperone BiP [EC:3.6.4.10]	ko03060	Protein export
Bm012339	K03934	NDUFS1; NADH dehydrogenase (ubiquinone) Fe-S protein 1 [EC:7.1.1.2]	ko00190	Oxidative phosphorylation
Bm012340	K02725	PSMA1; 20S proteasome subunit alpha 6 [EC:3.4.25.1]	ko03050	Proteasome
Bm012360	K12845	SNU13, NHP2L; U4/U6 small nuclear ribonucleoprotein SNU13	ko03040	Spliceosome
Bm012361	K00940	ndk, NME; nucleoside-diphosphate kinase [EC:2.7.4.6]	ko00230	Purine metabolism
Bm012364	K10747	LIG1; DNA ligase 1 [EC:6.5.1.1 6.5.1.6 6.5.1.7]	ko03030	DNA replication
Bm012375	K00318	PRODH, fadM, putB; proline dehydrogenase [EC:1.5.5.2]	ko00330	Arginine and proline metabolism
Bm012377	K01832	TBXAS1, CYP5A; thromboxane-A synthase [EC:5.3.99.5]	ko00590	Arachidonic acid metabolism
Bm012387	K01823	idi, IDI; isopentenyl-diphosphate Delta-isomerase [EC:5.3.3.2]	ko00900	Terpenoid backbone biosynthesis
Bm012388	K01764	HCCS; cytochrome c heme-lyase [EC:4.4.1.17]	ko00860	Porphyrin metabolism
Bm012389	K01832	TBXAS1, CYP5A; thromboxane-A synthase [EC:5.3.99.5]	ko00590	Arachidonic acid metabolism
Bm012416	K02901	RP-L27e, RPL27; large subunit ribosomal protein L27e	ko03010	Ribosome
Bm012419	K11420	EHMT; [histone H3]-lysine9 N-trimethyltransferase EHMT [EC:2.1.1.355]	ko00310	Lysine degradation
Bm012431	K11353	NDUFA13; NADH dehydrogenase (ubiquinone) 1 alpha subcomplex subunit 13	ko00190	Oxidative phosphorylation
Bm012438	K02980	RP-S29e, RPS29; small subunit ribosomal protein S29e	ko03010	Ribosome
Bm012445	K07375	TUBB; tubulin beta	ko04145	Phagosome
Bm012446	K07375	TUBB; tubulin beta	ko04145	Phagosome
Bm012447	K00276	AOC3, AOC2, tynA; primary-amine oxidase [EC:1.4.3.21]	ko00260	Glycine, serine and threonine metabolism
Bm012448	K07375	TUBB; tubulin beta	ko04145	Phagosome
Bm012460	K09648	IMP2; mitochondrial inner membrane protease subunit 2 [EC:3.4.21.-]	ko03060	Protein export
Bm012462	K09648	IMP2; mitochondrial inner membrane protease subunit 2 [EC:3.4.21.-]	ko03060	Protein export
Bm012463	K09648	IMP2; mitochondrial inner membrane protease subunit 2 [EC:3.4.21.-]	ko03060	Protein export
Bm012464	K14563	NOP1, FBL; rRNA 2'-O-methyltransferase fibrillarin [EC:2.1.1.-]	ko03008	Ribosome biogenesis in eukaryotes
Bm012465	K14563	NOP1, FBL; rRNA 2'-O-methyltransferase fibrillarin [EC:2.1.1.-]	ko03008	Ribosome biogenesis in eukaryotes
Bm012467	K15891	FLDH; NAD+-dependent farnesol dehydrogenase [EC:1.1.1.354]	ko00900	Terpenoid backbone biosynthesis
Bm012473	K03097	CSNK2A; casein kinase II subunit alpha [EC:2.7.11.1]	ko03008	Ribosome biogenesis in eukaryotes
Bm012477	K00981	E2.7.7.41, CDS1, CDS2, cdsA; phosphatidate cytidylyltransferase [EC:2.7.7.41]	ko04070	Phosphatidylinositol signaling system
Bm012493	K03347	CUL1, CDC53; cullin 1	ko04120	Ubiquitin mediated proteolysis
Bm012494	K03347	CUL1, CDC53; cullin 1	ko04120	Ubiquitin mediated proteolysis
Bm012500	K02132	ATPeF1A, ATP5A1, ATP1; F-type H+-transporting ATPase subunit alpha	ko00190	Oxidative phosphorylation
Bm012502	K00026	MDH2; malate dehydrogenase [EC:1.1.1.37]	ko00270	Cysteine and methionine metabolism
Bm012524	K02212	MCM4, CDC54; DNA replication licensing factor MCM4 [EC:5.6.2.3]	ko03030	DNA replication
Bm012529	K01115	PLD1_2; phospholipase D1/2 [EC:3.1.4.4]	ko04144	Endocytosis
Bm012549	K02995	RP-S8e, RPS8; small subunit ribosomal protein S8e	ko03010	Ribosome
Bm012554	K00253	IVD, ivd; isovaleryl-CoA dehydrogenase [EC:1.3.8.4]	ko00280	Valine, leucine and isoleucine degradation
Bm012556	K14545	RRP7; ribosomal RNA-processing protein 7	ko03008	Ribosome biogenesis in eukaryotes
Bm012582	K02137	ATPeF0O, ATP5O, ATP5; F-type H+-transporting ATPase subunit O	ko00190	Oxidative phosphorylation
Bm012583	K14561	IMP4; U3 small nucleolar ribonucleoprotein protein IMP4	ko03008	Ribosome biogenesis in eukaryotes
Bm012595	K02937	RP-L7e, RPL7; large subunit ribosomal protein L7e	ko03010	Ribosome
Bm012598	K01115	PLD1_2; phospholipase D1/2 [EC:3.1.4.4]	ko04144	Endocytosis
Bm012601	K00566	mnmA, trmU; tRNA-uridine 2-sulfurtransferase [EC:2.8.1.13]	ko04122	Sulfur relay system
Bm012605	K01583	E4.1.1.19; arginine decarboxylase [EC:4.1.1.19]	ko00330	Arginine and proline metabolism
Bm012611	K00814	GPT, ALT; alanine transaminase [EC:2.6.1.2]	ko00220	Arginine biosynthesis
Bm012618	K10839	RAD23, HR23; UV excision repair protein RAD23	ko04141	Protein processing in endoplasmic reticulum
Bm012628	K05933	E1.14.17.4; aminocyclopropanecarboxylate oxidase [EC:1.14.17.4]	ko00270	Cysteine and methionine metabolism
Bm012631	K10573	UBE2A, UBC2, RAD6A; ubiquitin-conjugating enzyme E2 A [EC:2.3.2.23]	ko04120	Ubiquitin mediated proteolysis
Bm012633	K00059	fabG, OAR1; 3-oxoacyl-[acyl-carrier protein] reductase [EC:1.1.1.100]	ko00061	Fatty acid biosynthesis
Bm012635	K01637	E4.1.3.1, aceA; isocitrate lyase [EC:4.1.3.1]	ko00630	Glyoxylate and dicarboxylate metabolism
Bm012644	K10756	RFC3_5; replication factor C subunit 3/5	ko03030	DNA replication
Bm012647	K02924	RP-L39e, RPL39; large subunit ribosomal protein L39e	ko03010	Ribosome
Bm012649	K03240	EIF2B5; translation initiation factor eIF-2B subunit epsilon	ko03013	Nucleocytoplasmic transport
Bm012655	K01697	CBS; cystathionine beta-synthase [EC:4.2.1.22]	ko00260	Glycine, serine and threonine metabolism
Bm012659	K00264	GLT1; glutamate synthase (NADH) [EC:1.4.1.14]	ko00250	Alanine, aspartate and glutamate metabolism
Bm012666	K00306	PIPOX; sarcosine oxidase / L-pipecolate oxidase [EC:1.5.3.1 1.5.3.7]	ko04146	Peroxisome
Bm012678	K14431	TGA; transcription factor TGA	ko04075	Plant hormone signal transduction
Bm012682	K01770	ispF; 2-C-methyl-D-erythritol 2,4-cyclodiphosphate synthase [EC:4.6.1.12]	ko00900	Terpenoid backbone biosynthesis
Bm012688	K01598	PPCDC, coaC; phosphopantothenoylcysteine decarboxylase [EC:4.1.1.36]	ko00770	Pantothenate and CoA biosynthesis
Bm012696	K04646	CLTC; clathrin heavy chain	ko04144	Endocytosis
Bm012699	K11262	ACACA; acetyl-CoA carboxylase / biotin carboxylase 1 [EC:6.4.1.2 6.3.4.14 2.1.3.15]	ko00261	Monobactam biosynthesis
Bm012722	K07889	RAB5C; Ras-related protein Rab-5C	ko04144	Endocytosis
Bm012725	K13424	WRKY33; WRKY transcription factor 33	ko04626	Plant-pathogen interaction
Bm012733	K00234	SDHA, SDH1; succinate dehydrogenase (ubiquinone) flavoprotein subunit [EC:1.3.5.1]	ko00020	Citrate cycle
Bm012751	K09562	HSPBP1, FES1; hsp70-interacting protein	ko04141	Protein processing in endoplasmic reticulum
Bm012765	K11262	ACACA; acetyl-CoA carboxylase / biotin carboxylase 1 [EC:6.4.1.2 6.3.4.14 2.1.3.15]	ko00261	Monobactam biosynthesis
Bm012770	K00006	GPD1; glycerol-3-phosphate dehydrogenase (NAD+) [EC:1.1.1.8]	ko00564	Glycerophospholipid metabolism
Bm012771	K03033	PSMD3, RPN3; 26S proteasome regulatory subunit N3	ko03050	Proteasome
Bm012784	K02134	ATPeF1D, ATP5D, ATP16; F-type H+-transporting ATPase subunit delta	ko00190	Oxidative phosphorylation
Bm012793	K02875	RP-L14e, RPL14; large subunit ribosomal protein L14e	ko03010	Ribosome
Bm012800	K13412	CPK; calcium-dependent protein kinase [EC:2.7.11.1]	ko04626	Plant-pathogen interaction
Bm012801	K00128	ALDH; aldehyde dehydrogenase (NAD+) [EC:1.2.1.3]	ko00280	Valine, leucine and isoleucine degradation
Bm012803	K00011	AKR1B; aldehyde reductase [EC:1.1.1.21]	ko00040	Pentose and glucuronate interconversions
Bm012804	K00026	MDH2; malate dehydrogenase [EC:1.1.1.37]	ko00270	Cysteine and methionine metabolism
Bm012806	K14492	ARR-A; two-component response regulator ARR-A family	ko04075	Plant hormone signal transduction
Bm012808	K02128	ATPeF0C, ATP5G, ATP9; F-type H+-transporting ATPase subunit c	ko00190	Oxidative phosphorylation
Bm012823	K04802	PCNA; proliferating cell nuclear antigen	ko03030	DNA replication
Bm012828	K03942	NDUFV1; NADH dehydrogenase (ubiquinone) flavoprotein 1 [EC:7.1.1.2]	ko00190	Oxidative phosphorylation
Bm012834	K02940	RP-L9e, RPL9; large subunit ribosomal protein L9e	ko03010	Ribosome
Bm012838	K00789	metK, MAT; S-adenosylmethionine synthetase [EC:2.5.1.6]	ko00270	Cysteine and methionine metabolism
Bm012845	K05933	E1.14.17.4; aminocyclopropanecarboxylate oxidase [EC:1.14.17.4]	ko00270	Cysteine and methionine metabolism
Bm012848	K05933	E1.14.17.4; aminocyclopropanecarboxylate oxidase [EC:1.14.17.4]	ko00270	Cysteine and methionine metabolism
Bm012856	K01920	gshB; glutathione synthase [EC:6.3.2.3]	ko00480	Glutathione metabolism
Bm012859	K00927	PGK, pgk; phosphoglycerate kinase [EC:2.7.2.3]	ko00010	Glycolysis / Gluconeogenesis
Bm012864	K00927	PGK, pgk; phosphoglycerate kinase [EC:2.7.2.3]	ko00010	Glycolysis / Gluconeogenesis
Bm012865	K00253	IVD, ivd; isovaleryl-CoA dehydrogenase [EC:1.3.8.4]	ko00280	Valine, leucine and isoleucine degradation
Bm012878	K00030	IDH3; isocitrate dehydrogenase (NAD+) [EC:1.1.1.41]	ko00020	Citrate cycle
Bm012908	K03217	yidC, spoIIIJ, OXA1, ccfA; YidC/Oxa1 family membrane protein insertase	ko03060	Protein export
Bm012927	K00819	rocD, OAT; ornithine--oxo-acid transaminase [EC:2.6.1.13]	ko00330	Arginine and proline metabolism
Bm012940	K01191	MAN2C1; alpha-mannosidase [EC:3.2.1.24]	ko00511	Other glycan degradation
Bm012952	K00799	GST, gst; glutathione S-transferase [EC:2.5.1.18]	ko00480	Glutathione metabolism
Bm012953	K02934	RP-L6e, RPL6; large subunit ribosomal protein L6e	ko03010	Ribosome
Bm012954	K02934	RP-L6e, RPL6; large subunit ribosomal protein L6e	ko03010	Ribosome
Bm012956	K03032	PSMD1, RPN2; 26S proteasome regulatory subunit N2	ko03050	Proteasome
Bm012966	K08738	CYC; cytochrome c	ko00920	Sulfur metabolism
Bm012967	K09422	MYBP; transcription factor MYB, plant	ko04626	Plant-pathogen interaction
Bm012975	K04565	SOD1; superoxide dismutase, Cu-Zn family [EC:1.15.1.1]	ko04146	Peroxisome
Bm012986	K11088	SNRPD3, SMD3; small nuclear ribonucleoprotein D3	ko03040	Spliceosome
Bm012996	K09503	DNAJA2; DnaJ homolog subfamily A member 2	ko04141	Protein processing in endoplasmic reticulum
[truncated: 51,047 more rows]
