# Supplementary material for: Variability in Leaf Color Induced by Chlorophyll Deficiency: Transcriptional Changes in Bamboo Leaves
Source: Preprints.org preprint supplement (doi:10.20944/preprints202311.0939.v2), 2023-12-27
Supplement: Supplementary file 2 [file supplementary › Table S7.tsv]

GO enrichment result													KEGG enrichment result
Class	GO_Name	GO_ID	GO_Level	P_value	EnrichmentScore	HitsGenesCountsInSelectedSet	HitsGenesCountsInBackground	AllGenesCountsInSelectedSet	AllGenesCountsInBackground	GenesOfSelectedSetInGOterm	corrected p-value(BH method)		Term Name	MainClass	GeneHitsInSelectedSet	AllGenesInSelectedSet	GeneHitsInBackground	AllGenesInBackground	p-value	enrichFactor	GeneListInSelectedSets	corrected p-value(BH method)
Biological process	amino acid transport	GO:0006865	8	1.65E-10	8.376687435	16	768	321	129068	Bm023380,Bm027516,Bm296082,Bm136170,Bm249605,Bm058336,Bm130587,Bm061425,Bm017180,Bm176081,Bm303363,Bm100162,Bm019262,Bm205025,Bm334467,Bm194558,	1.58E-07		Starch and sucrose metabolism	A09100 Metabolism	10	84	1086	52948	8.85E-06	5.80417434	[Bm037251, Bm094900, Bm199721, Bm268433, Bm260530, Bm208171, Bm238314, Bm269319, Bm057346, Bm316524]	0.002231111
Biological process	amino acid transmembrane transport	GO:0003333	9	4.13E-10	8.628347573	15	699	321	129068	Bm023380,Bm027516,Bm296082,Bm136170,Bm249605,Bm058336,Bm130587,Bm061425,Bm017180,Bm176081,Bm303363,Bm100162,Bm019262,Bm205025,Bm194558,	1.98E-07		Metabolism	A09100 Metabolism	57	84	24353	52948	4.27E-05	1.475341847	[Bm037251, Bm229166, Bm279466, Bm284014, Bm025547, Bm057346, Bm111387, Bm210262, Bm238314, Bm322255, Bm084885, Bm050578, Bm269923, Bm152924, Bm254590, Bm226426, Bm152925, Bm316524, Bm051463, Bm075533, Bm268433, Bm293404, Bm215340, Bm007668, Bm198649, Bm306496, Bm249095, Bm025595, Bm094900, Bm199721, Bm224493, Bm125170, Bm265636, Bm269319, Bm185760, Bm324050, Bm223277, Bm026459, Bm208171, Bm115440…	0.005381264
Biological process	carboxylic acid transmembrane transport	GO:1905039	8	3.84E-09	7.31056358	15	825	321	129068	Bm023380,Bm027516,Bm296082,Bm136170,Bm249605,Bm058336,Bm130587,Bm061425,Bm017180,Bm176081,Bm303363,Bm100162,Bm019262,Bm205025,Bm194558,	1.23E-06		Transcription factors	A09180 Brite Hierarchies	7	84	899	52948	5.80E-04	4.908045977	[Bm333823, Bm046722, Bm163498, Bm113342, Bm026559, Bm136381, Bm307159]	0.036524418
Biological process	organic acid transmembrane transport	GO:1903825	7	3.84E-09	7.31056358	15	825	321	129068	Bm023380,Bm027516,Bm296082,Bm136170,Bm249605,Bm058336,Bm130587,Bm061425,Bm017180,Bm176081,Bm303363,Bm100162,Bm019262,Bm205025,Bm194558,	1.23E-06		Phenylalanine, tyrosine and tryptophan biosynthesis	A09100 Metabolism	5	84	503	52948	0.001264451	6.2657389	[Bm224493, Bm293404, Bm226426, Bm084885, Bm075533]	0.053106943
Biological process	organic acid transport	GO:0015849	6	2.43E-08	5.477064861	17	1248	321	129068	Bm023380,Bm027516,Bm296082,Bm136170,Bm249605,Bm058336,Bm321404,Bm130587,Bm061425,Bm017180,Bm176081,Bm303363,Bm100162,Bm019262,Bm205025,Bm334467,Bm194558,	4.66E-06		alpha-Linolenic acid metabolism	A09100 Metabolism	5	84	542	52948	0.00175329	5.814883149	[Bm284014, Bm056329, Bm215340, Bm306496, Bm025595]	0.063118457
Biological process	carboxylic acid transport	GO:0046942	7	2.43E-08	5.477064861	17	1248	321	129068	Bm023380,Bm027516,Bm296082,Bm136170,Bm249605,Bm058336,Bm321404,Bm130587,Bm061425,Bm017180,Bm176081,Bm303363,Bm100162,Bm019262,Bm205025,Bm334467,Bm194558,	4.66E-06		Biosynthesis of other secondary metabolites	A09100 Metabolism	9	84	1886	52948	0.003028404	3.00795334	[Bm082879, Bm229166, Bm109035, Bm324050, Bm208171, Bm125170, Bm184315, Bm269923, Bm047463]	0.095394736
Biological process	organic anion transport	GO:0015711	6	4.81E-08	5.221831128	17	1309	321	129068	Bm023380,Bm027516,Bm296082,Bm136170,Bm249605,Bm058336,Bm321404,Bm130587,Bm061425,Bm017180,Bm176081,Bm303363,Bm100162,Bm019262,Bm205025,Bm334467,Bm194558,	6.58E-06		Metabolism of terpenoids and polyketides	A09100 Metabolism	7	84	1490	52948	0.009534116	2.961297539	[Bm204913, Bm210262, Bm099987, Bm169368, Bm152924, Bm254590, Bm152925]	0.266955244
Molecular function	chitinase activity	GO:0004568	6	7.96E-07	29.90740741	5	64	378	144704	Bm198649,Bm026459,Bm007668,Bm328855,Bm249095,	3.31E-04		Plant hormone signal transduction	A09130 Environmental Information Processing	6	84	1218	52948	0.013026806	3.105090312	[Bm270991, Bm108635, Bm014516, Bm271857, Bm253084, Bm286928]	0.273562928
Molecular function	amino acid transmembrane transporter activity	GO:0015171	6	1.10E-06	6.705355037	11	628	378	144704	Bm023380,Bm027516,Bm296082,Bm136170,Bm058336,Bm061425,Bm017180,Bm176081,Bm303363,Bm100162,Bm194558,	2.28E-04
Molecular function	organic acid transmembrane transporter activity	GO:0005342	4	1.39E-06	5.881917769	12	781	378	144704	Bm023380,Bm027516,Bm296082,Bm136170,Bm058336,Bm321404,Bm061425,Bm017180,Bm176081,Bm303363,Bm100162,Bm194558,	1.93E-04
Molecular function	carboxylic acid transmembrane transporter activity	GO:0046943	5	1.39E-06	5.881917769	12	781	378	144704	Bm023380,Bm027516,Bm296082,Bm136170,Bm058336,Bm321404,Bm061425,Bm017180,Bm176081,Bm303363,Bm100162,Bm194558,	1.93E-04
Biological process	cell wall macromolecule catabolic process	GO:0016998	6	1.89E-06	16.75337487	6	144	321	129068	Bm198649,Bm163277,Bm026459,Bm007668,Bm328855,Bm249095,	1.81E-04
Molecular function	NAD+ ADP-ribosyltransferase activity	GO:0003950	6	2.94E-06	15.51951952	6	148	378	144704	Bm327945,Bm119602,Bm159183,Bm121452,Bm189415,Bm300252,	2.45E-04
Biological process	cell wall macromolecule metabolic process	GO:0044036	5	3.35E-06	15.17286781	6	159	321	129068	Bm198649,Bm163277,Bm026459,Bm007668,Bm328855,Bm249095,	2.91E-04
Molecular function	organic anion transmembrane transporter activity	GO:0008514	4	3.55E-06	5.366562825	12	856	378	144704	Bm023380,Bm027516,Bm296082,Bm136170,Bm058336,Bm321404,Bm061425,Bm017180,Bm176081,Bm303363,Bm100162,Bm194558,	2.46E-04
Biological process	amino sugar metabolic process	GO:0006040	5	8.28E-06	6.892817089	9	525	321	129068	Bm075533,Bm198649,Bm084885,Bm293404,Bm026459,Bm224493,Bm007668,Bm328855,Bm249095,	5.66E-04
Biological process	glucosamine-containing compound catabolic process	GO:1901072	7	1.08E-05	17.63513144	5	114	321	129068	Bm198649,Bm026459,Bm007668,Bm328855,Bm249095,	6.93E-04
Biological process	amino sugar catabolic process	GO:0046348	6	1.08E-05	17.63513144	5	114	321	129068	Bm198649,Bm026459,Bm007668,Bm328855,Bm249095,	6.93E-04
Biological process	chitin catabolic process	GO:0006032	8	1.08E-05	17.63513144	5	114	321	129068	Bm198649,Bm026459,Bm007668,Bm328855,Bm249095,	6.93E-04
Molecular function	galactosyltransferase activity	GO:0008378	6	3.26E-05	10.16322517	6	226	378	144704	Bm036367,Bm125395,Bm243916,Bm219933,Bm248397,Bm325152,	0.001506901
Biological process	transmembrane transport	GO:0055085	5	8.50E-05	1.719991102	52	12156	321	129068	Bm096546,Bm276032,Bm059497,Bm322483,Bm023380,Bm176642,Bm283711,Bm027516,Bm296082,Bm278659,Bm137375,Bm313610,Bm136170,Bm194393,Bm245786,Bm161475,Bm085235,Bm249605,Bm192873,Bm153144,Bm153141,Bm058336,Bm313808,Bm211491,Bm270596,Bm265062,Bm321404,Bm130587,Bm135809,Bm061425,Bm314189,Bm203560,Bm034973,Bm017180,Bm176081,Bm123239,Bm189276,Bm093755,Bm086099,Bm286965,Bm331461,Bm155476,Bm142070,Bm124885,Bm3…	0.003393368
Biological process	macromolecule catabolic process	GO:0009057	5	1.12E-04	2.611763539	20	3079	321	129068	Bm028745,Bm202707,Bm202706,Bm044071,Bm044069,Bm198649,Bm199721,Bm199724,Bm022381,Bm269319,Bm059439,Bm279466,Bm163277,Bm260314,Bm026459,Bm205788,Bm007668,Bm328855,Bm249095,Bm007294,	0.004282938
Biological process	carbohydrate derivative transport	GO:1901264	6	2.34E-04	9.222041213	5	218	321	129068	Bm049752,Bm107127,Bm107118,Bm085877,Bm001533,	0.007745007
Biological process	nitrogen compound transport	GO:0071705	5	2.42E-04	1.836648381	38	8319	321	129068	Bm096546,Bm142777,Bm023380,Bm027516,Bm296082,Bm049752,Bm136170,Bm161475,Bm336268,Bm249605,Bm107127,Bm107118,Bm058336,Bm048032,Bm321404,Bm130587,Bm188447,Bm084758,Bm061425,Bm129385,Bm174271,Bm139062,Bm017180,Bm176081,Bm297661,Bm331461,Bm115837,Bm032739,Bm303363,Bm001533,Bm100162,Bm019262,Bm205025,Bm335665,Bm334467,Bm139610,Bm300249,Bm194558,	0.007715441
Cellular component	RNA-directed RNA polymerase complex	GO:0031379	7	3.04E-04	5.562401863	7	506	219	88056	Bm132841,Bm016966,Bm179494,Bm177279,Bm177278,Bm016913,Bm233743,	0.056159504
Biological process	defense response to fungus	GO:0050832	7	3.12E-04	8.665538726	5	232	321	129068	Bm205788,Bm043623,Bm043624,Bm328855,Bm136214,	0.009641953
Biological process	aminoglycan catabolic process	GO:0006026	6	4.15E-04	8.139291435	5	247	321	129068	Bm198649,Bm026459,Bm007668,Bm328855,Bm249095,	0.012052431
Molecular function	RNA-dependent RNA polymerase activity	GO:0003968	8	4.17E-04	5.295857122	7	506	378	144704	Bm132841,Bm016966,Bm179494,Bm177279,Bm177278,Bm016913,Bm233743,	0.01240294
Biological process	response to fungus	GO:0009620	6	4.47E-04	8.009581611	5	251	321	129068	Bm205788,Bm043623,Bm043624,Bm328855,Bm136214,	0.012582781
Biological process	DNA catabolic process	GO:0006308	8	4.75E-04	4.034257494	9	897	321	129068	Bm028745,Bm202707,Bm202706,Bm044071,Bm044069,Bm199724,Bm059439,Bm279466,Bm260314,	0.012998031
Biological process	viral genome replication	GO:0019079	3	5.70E-04	4.382354189	8	734	321	129068	Bm132841,Bm199726,Bm084758,Bm179494,Bm007466,Bm177279,Bm177278,Bm032739,	0.015172452
Biological process	organic substance transport	GO:0071702	5	6.40E-04	1.687896239	42	10005	321	129068	Bm142777,Bm023380,Bm027516,Bm296082,Bm049752,Bm136170,Bm161475,Bm085235,Bm336268,Bm249605,Bm107127,Bm107118,Bm058336,Bm211491,Bm048032,Bm321404,Bm130587,Bm188447,Bm084758,Bm061425,Bm085877,Bm129385,Bm174271,Bm139062,Bm017180,Bm176081,Bm297661,Bm286965,Bm331461,Bm115837,Bm032739,Bm303363,Bm001533,Bm100162,Bm249053,Bm019262,Bm205025,Bm335665,Bm334467,Bm139610,Bm300249,Bm194558,	0.015337173
Molecular function	racemase and epimerase activity	GO:0016854	4	7.75E-04	7.089163237	5	270	378	144704	Bm075533,Bm084885,Bm293404,Bm224493,Bm205788,	0.020155674
Biological process	aromatic compound catabolic process	GO:0019439	5	0.001262089	2.849953906	12	1693	321	129068	Bm028745,Bm258941,Bm202707,Bm202706,Bm044071,Bm044069,Bm199724,Bm030896,Bm059439,Bm279466,Bm260314,Bm303363,	0.027479125
Molecular function	glycosyltransferase activity	GO:0016757	4	0.001312235	2.149437478	20	3562	378	144704	Bm036367,Bm327945,Bm119602,Bm125395,Bm159183,Bm058326,Bm121452,Bm112937,Bm092014,Bm189415,Bm243916,Bm219933,Bm248397,Bm325152,Bm138664,Bm063252,Bm287523,Bm163718,Bm139610,Bm300252,	0.032111157
Molecular function	transferase activity	GO:0016740	3	0.001326771	1.33086849	98	28189	378	144704	Bm132841,Bm036367,Bm327945,Bm322255,Bm211749,Bm254590,Bm025595,Bm119602,Bm209449,Bm131783,Bm087962,Bm125395,Bm244355,Bm016966,Bm202712,Bm075533,Bm162233,Bm312769,Bm194274,Bm222223,Bm159183,Bm108635,Bm232359,Bm099987,Bm235879,Bm210262,Bm330849,Bm058326,Bm051463,Bm030893,Bm121452,Bm112937,Bm211491,Bm202441,Bm087910,Bm084885,Bm050578,Bm226426,Bm092014,Bm189415,Bm293404,Bm179838,Bm299091,Bm263934,Bm3…	0.030663158
Cellular component	transferase complex	GO:1990234	4	0.001485384	1.883628286	26	5550	219	88056	Bm132841,Bm016966,Bm312769,Bm194274,Bm099987,Bm330849,Bm030893,Bm112937,Bm211491,Bm131268,Bm307791,Bm228702,Bm271538,Bm179494,Bm295376,Bm324079,Bm177279,Bm177278,Bm138664,Bm016913,Bm097340,Bm249053,Bm097123,Bm233743,Bm244752,Bm145063,	0.137398032
Molecular function	transporter activity	GO:0005215	2	0.001489829	1.514099465	54	13653	378	144704	Bm096546,Bm059497,Bm165429,Bm322483,Bm023380,Bm176642,Bm283711,Bm027516,Bm296082,Bm278659,Bm049752,Bm313610,Bm136170,Bm194393,Bm245786,Bm085235,Bm192873,Bm153144,Bm107127,Bm153141,Bm107118,Bm058336,Bm211491,Bm270596,Bm265062,Bm321404,Bm247343,Bm135809,Bm061425,Bm085877,Bm314189,Bm203560,Bm034973,Bm332516,Bm017180,Bm176081,Bm123239,Bm189276,Bm093755,Bm086099,Bm286965,Bm331461,Bm155476,Bm142070,Bm1…	0.03261942
Biological process	aromatic compound biosynthetic process	GO:0019438	5	0.001636986	1.396380246	73	21020	321	129068	Bm335691,Bm132841,Bm142777,Bm322255,Bm189608,Bm208359,Bm131783,Bm106764,Bm321374,Bm244355,Bm016966,Bm075533,Bm085235,Bm108635,Bm298150,Bm324606,Bm099987,Bm260524,Bm238958,Bm213897,Bm243182,Bm153141,Bm051463,Bm082774,Bm146636,Bm236884,Bm131268,Bm327191,Bm084885,Bm226426,Bm163285,Bm293404,Bm316395,Bm223277,Bm062753,Bm152393,Bm044308,Bm179494,Bm044781,Bm224493,Bm295376,Bm294166,Bm176082,Bm177279,Bm1…	0.034092005
Molecular function	pentosyltransferase activity	GO:0016763	5	0.001712566	4.825396825	6	476	378	144704	Bm327945,Bm119602,Bm159183,Bm121452,Bm189415,Bm300252,	0.03562138
Biological process	viral life cycle	GO:0019058	3	0.001740849	2.741461342	12	1760	321	129068	Bm132841,Bm047373,Bm199726,Bm030896,Bm084758,Bm179494,Bm007466,Bm177279,Bm177278,Bm032739,Bm007294,Bm098253,	0.034744449
Molecular function	carbon-oxygen lyase activity	GO:0016835	4	0.001752787	3.344983819	9	1030	378	144704	Bm016966,Bm075533,Bm204913,Bm030896,Bm084885,Bm293404,Bm223277,Bm224493,Bm016913,	0.034721868
Molecular function	transmembrane transporter activity	GO:0022857	3	0.001928347	1.533637963	49	12231	378	144704	Bm096546,Bm322483,Bm023380,Bm176642,Bm283711,Bm027516,Bm296082,Bm278659,Bm049752,Bm313610,Bm136170,Bm194393,Bm245786,Bm085235,Bm192873,Bm153144,Bm107127,Bm153141,Bm107118,Bm058336,Bm211491,Bm270596,Bm265062,Bm321404,Bm061425,Bm314189,Bm203560,Bm034973,Bm332516,Bm017180,Bm176081,Bm123239,Bm189276,Bm093755,Bm086099,Bm286965,Bm331461,Bm155476,Bm142070,Bm124885,Bm303363,Bm001533,Bm100162,Bm004827,Bm0…	0.036463286
Biological process	glucosamine-containing compound metabolic process	GO:1901071	6	0.002257469	5.553604929	5	362	321	129068	Bm198649,Bm026459,Bm007668,Bm328855,Bm249095,	0.040049181
Biological process	chitin metabolic process	GO:0006030	7	0.002257469	5.553604929	5	362	321	129068	Bm198649,Bm026459,Bm007668,Bm328855,Bm249095,	0.040049181
Biological process	DNA-templated transcription	GO:0006351	9	0.002342782	1.444837007	59	16419	321	129068	Bm335691,Bm132841,Bm142777,Bm189608,Bm208359,Bm106764,Bm321374,Bm244355,Bm016966,Bm085235,Bm108635,Bm298150,Bm324606,Bm099987,Bm260524,Bm238958,Bm213897,Bm243182,Bm153141,Bm082774,Bm146636,Bm236884,Bm131268,Bm327191,Bm163285,Bm316395,Bm062753,Bm152393,Bm044308,Bm179494,Bm044781,Bm295376,Bm294166,Bm176082,Bm177279,Bm177278,Bm099049,Bm028266,Bm019882,Bm335606,Bm138664,Bm046680,Bm016913,Bm215384,Bm0…	0.040078304
Biological process	RNA biosynthetic process	GO:0032774	8	0.002434644	1.442377261	59	16447	321	129068	Bm335691,Bm132841,Bm142777,Bm189608,Bm208359,Bm106764,Bm321374,Bm244355,Bm016966,Bm085235,Bm108635,Bm298150,Bm324606,Bm099987,Bm260524,Bm238958,Bm213897,Bm243182,Bm153141,Bm082774,Bm146636,Bm236884,Bm131268,Bm327191,Bm163285,Bm316395,Bm062753,Bm152393,Bm044308,Bm179494,Bm044781,Bm295376,Bm294166,Bm176082,Bm177279,Bm177278,Bm099049,Bm028266,Bm019882,Bm335606,Bm138664,Bm046680,Bm016913,Bm215384,Bm0…	0.038873141
Biological process	tryptophan biosynthetic process	GO:0000162	10	0.002524589	4.459308653	6	541	321	129068	Bm075533,Bm084885,Bm226426,Bm293404,Bm223277,Bm224493,	0.039648468
Biological process	indolalkylamine biosynthetic process	GO:0046219	8	0.002524589	4.459308653	6	541	321	129068	Bm075533,Bm084885,Bm226426,Bm293404,Bm223277,Bm224493,	0.039648468
Biological process	tyrosine biosynthetic process	GO:0006571	11	0.00254763	4.451081146	6	542	321	129068	Bm075533,Bm084885,Bm226426,Bm293404,Bm223277,Bm224493,	0.038740145
Biological process	L-phenylalanine biosynthetic process	GO:0009094	11	0.00254763	4.451081146	6	542	321	129068	Bm075533,Bm084885,Bm226426,Bm293404,Bm223277,Bm224493,	0.038740145
Biological process	erythrose 4-phosphate/phosphoenolpyruvate family amino acid biosynthetic process	GO:1902223	10	0.00254763	4.451081146	6	542	321	129068	Bm075533,Bm084885,Bm226426,Bm293404,Bm223277,Bm224493,	0.038740145
Biological process	aromatic amino acid family biosynthetic process, prephenate pathway	GO:0009095	10	0.002594183	4.434716877	6	544	321	129068	Bm075533,Bm084885,Bm226426,Bm293404,Bm223277,Bm224493,	0.03709295
Biological process	aromatic amino acid family biosynthetic process	GO:0009073	9	0.002617698	4.426579782	6	545	321	129068	Bm075533,Bm084885,Bm226426,Bm293404,Bm223277,Bm224493,	0.036878749
Molecular function	DNA-binding transcription factor activity	GO:0003700	3	0.002913227	1.812636166	26	5491	378	144704	Bm335691,Bm189608,Bm208359,Bm106764,Bm321374,Bm324606,Bm260524,Bm153141,Bm146636,Bm236884,Bm163285,Bm316395,Bm152393,Bm044308,Bm294166,Bm099049,Bm019882,Bm335606,Bm046680,Bm083091,Bm092941,Bm310190,Bm034650,Bm076580,Bm117876,Bm098253,	0.043282224
Biological process	transport	GO:0006810	4	0.00294614	1.309804898	90	27628	321	129068	Bm096546,Bm276032,Bm142777,Bm059497,Bm165429,Bm322483,Bm023380,Bm176642,Bm283711,Bm027516,Bm276470,Bm296082,Bm278659,Bm137375,Bm049752,Bm313610,Bm136170,Bm194393,Bm245786,Bm161475,Bm208171,Bm085235,Bm312507,Bm336268,Bm249605,Bm192873,Bm153144,Bm107127,Bm153141,Bm107118,Bm058336,Bm313808,Bm211491,Bm270596,Bm048032,Bm265062,Bm321404,Bm130587,Bm327191,Bm247343,Bm135809,Bm188447,Bm084758,Bm061425,Bm0…	0.038140565
Molecular function	chitin binding	GO:0008061	4	0.0031	5.15922931	5	371	378	144704	Bm198649,Bm026459,Bm007668,Bm328855,Bm249095,	0.044468964
Biological process	cell wall organization or biogenesis	GO:0071554	3	0.003271865	3.312716761	8	971	321	129068	Bm117894,Bm198649,Bm267131,Bm163277,Bm026459,Bm007668,Bm328855,Bm249095,	0.040185214
Biological process	catabolic process	GO:0009056	3	0.003280754	1.657341106	33	8006	321	129068	Bm028745,Bm258941,Bm202707,Bm202706,Bm044071,Bm276470,Bm044069,Bm198649,Bm199721,Bm199724,Bm022381,Bm051463,Bm030896,Bm269319,Bm059439,Bm279466,Bm163277,Bm260314,Bm223277,Bm026459,Bm314189,Bm205788,Bm007668,Bm335606,Bm303363,Bm287580,Bm328855,Bm217227,Bm092941,Bm249095,Bm300249,Bm007294,Bm098253,	0.03978433
Biological process	biological process involved in interspecies interaction between organisms	GO:0044419	2	0.003284313	2.122128826	17	3221	321	129068	Bm108635,Bm298150,Bm030896,Bm067035,Bm321404,Bm174271,Bm286965,Bm237272,Bm205788,Bm237270,Bm043623,Bm043624,Bm151405,Bm328855,Bm152925,Bm136214,Bm007294,	0.039329651
Biological process	tryptophan metabolic process	GO:0006568	9	0.003505852	3.008087258	9	1203	321	129068	Bm276470,Bm075533,Bm030896,Bm084885,Bm226426,Bm293404,Bm223277,Bm224493,Bm287580,	0.041464269
Biological process	indolalkylamine metabolic process	GO:0006586	7	0.003505852	3.008087258	9	1203	321	129068	Bm276470,Bm075533,Bm030896,Bm084885,Bm226426,Bm293404,Bm223277,Bm224493,Bm287580,	0.041464269
Biological process	organic cyclic compound catabolic process	GO:1901361	5	0.003827259	2.612457747	11	1693	321	129068	Bm028745,Bm258941,Bm202707,Bm202706,Bm044071,Bm044069,Bm199724,Bm030896,Bm059439,Bm279466,Bm260314,	0.044174873
Biological process	establishment of localization	GO:0051234	3	0.003992591	1.296245647	90	27917	321	129068	Bm096546,Bm276032,Bm142777,Bm059497,Bm165429,Bm322483,Bm023380,Bm176642,Bm283711,Bm027516,Bm276470,Bm296082,Bm278659,Bm137375,Bm049752,Bm313610,Bm136170,Bm194393,Bm245786,Bm161475,Bm208171,Bm085235,Bm312507,Bm336268,Bm249605,Bm192873,Bm153144,Bm107127,Bm153141,Bm107118,Bm058336,Bm313808,Bm211491,Bm270596,Bm048032,Bm265062,Bm321404,Bm130587,Bm327191,Bm247343,Bm135809,Bm188447,Bm084758,Bm061425,Bm0…	0.045534554
Biological process	nucleobase-containing compound catabolic process	GO:0034655	6	0.004045113	2.942056075	9	1230	321	129068	Bm028745,Bm202707,Bm202706,Bm044071,Bm044069,Bm199724,Bm059439,Bm279466,Bm260314,	0.045590798
Biological process	heterocycle biosynthetic process	GO:0018130	5	0.004203263	1.349957182	72	21445	321	129068	Bm335691,Bm132841,Bm142777,Bm322255,Bm189608,Bm208359,Bm131783,Bm106764,Bm321374,Bm244355,Bm016966,Bm075533,Bm085235,Bm108635,Bm298150,Bm324606,Bm099987,Bm260524,Bm238958,Bm213897,Bm243182,Bm153141,Bm051463,Bm082774,Bm146636,Bm236884,Bm131268,Bm327191,Bm084885,Bm226426,Bm163285,Bm293404,Bm316395,Bm223277,Bm062753,Bm152393,Bm044308,Bm179494,Bm044781,Bm224493,Bm295376,Bm294166,Bm176082,Bm177279,Bm1…	0.046284209
Biological process	L-phenylalanine metabolic process	GO:0006558	10	0.004345273	3.987580134	6	605	321	129068	Bm075533,Bm084885,Bm226426,Bm293404,Bm223277,Bm224493,	0.047304219
Biological process	erythrose 4-phosphate/phosphoenolpyruvate family amino acid metabolic process	GO:1902221	9	0.004345273	3.987580134	6	605	321	129068	Bm075533,Bm084885,Bm226426,Bm293404,Bm223277,Bm224493,	0.047304219
Biological process	nucleobase-containing compound biosynthetic process	GO:0034654	6	0.004354364	1.380683754	64	18638	321	129068	Bm335691,Bm132841,Bm142777,Bm322255,Bm189608,Bm208359,Bm131783,Bm106764,Bm321374,Bm244355,Bm016966,Bm085235,Bm108635,Bm298150,Bm324606,Bm099987,Bm260524,Bm238958,Bm213897,Bm243182,Bm153141,Bm051463,Bm082774,Bm146636,Bm236884,Bm131268,Bm327191,Bm163285,Bm316395,Bm062753,Bm152393,Bm044308,Bm179494,Bm044781,Bm295376,Bm294166,Bm176082,Bm177279,Bm177278,Bm099049,Bm028266,Bm019882,Bm335606,Bm138664,Bm0…	0.046349781
Biological process	response to organic substance	GO:0010033	4	0.004552374	2.700342491	10	1489	321	129068	Bm271857,Bm199721,Bm286928,Bm269319,Bm321404,Bm014259,Bm145955,Bm145256,Bm328855,Bm251273,	0.047924993
Biological process	indole-containing compound biosynthetic process	GO:0042435	6	0.00477283	3.910025902	6	617	321	129068	Bm075533,Bm084885,Bm226426,Bm293404,Bm223277,Bm224493,	0.049699683
Biological process	regulation of DNA-templated transcription	GO:0006355	9	0.004810948	1.472021098	47	12838	321	129068	Bm335691,Bm142777,Bm189608,Bm208359,Bm106764,Bm321374,Bm085235,Bm108635,Bm298150,Bm324606,Bm099987,Bm260524,Bm238958,Bm213897,Bm243182,Bm153141,Bm082774,Bm146636,Bm236884,Bm327191,Bm163285,Bm316395,Bm062753,Bm152393,Bm044308,Bm044781,Bm294166,Bm176082,Bm099049,Bm028266,Bm019882,Bm335606,Bm046680,Bm215384,Bm083091,Bm287347,Bm092941,Bm310190,Bm163718,Bm034650,Bm076580,Bm117876,Bm300249,Bm212933,Bm1…	0.049557942
Biological process	regulation of RNA biosynthetic process	GO:2001141	8	0.004831669	1.471677194	47	12841	321	129068	Bm335691,Bm142777,Bm189608,Bm208359,Bm106764,Bm321374,Bm085235,Bm108635,Bm298150,Bm324606,Bm099987,Bm260524,Bm238958,Bm213897,Bm243182,Bm153141,Bm082774,Bm146636,Bm236884,Bm327191,Bm163285,Bm316395,Bm062753,Bm152393,Bm044308,Bm044781,Bm294166,Bm176082,Bm099049,Bm028266,Bm019882,Bm335606,Bm046680,Bm215384,Bm083091,Bm287347,Bm092941,Bm310190,Bm163718,Bm034650,Bm076580,Bm117876,Bm300249,Bm212933,Bm1…	0.049241903
Cellular component	transferase complex, transferring phosphorus-containing groups	GO:0061695	5	0.004901973	2.025302892	17	3375	219	88056	Bm132841,Bm016966,Bm194274,Bm099987,Bm330849,Bm211491,Bm131268,Bm179494,Bm295376,Bm324079,Bm177279,Bm177278,Bm138664,Bm016913,Bm249053,Bm097123,Bm233743,	0.302288327
Biological process	cellular nitrogen compound catabolic process	GO:0044270	5	0.005031527	2.66102579	10	1511	321	129068	Bm028745,Bm258941,Bm202707,Bm202706,Bm044071,Bm044069,Bm199724,Bm059439,Bm279466,Bm260314,	0.050738976
Molecular function	carboxy-lyase activity	GO:0016831	5	0.005109997	3.07481779	8	996	378	144704	Bm229166,Bm322483,Bm075533,Bm084885,Bm293404,Bm224493,Bm082879,Bm269923,	0.064416935
Biological process	localization	GO:0051179	2	0.005267583	1.283692434	90	28190	321	129068	Bm096546,Bm276032,Bm142777,Bm059497,Bm165429,Bm322483,Bm023380,Bm176642,Bm283711,Bm027516,Bm276470,Bm296082,Bm278659,Bm137375,Bm049752,Bm313610,Bm136170,Bm194393,Bm245786,Bm161475,Bm208171,Bm085235,Bm312507,Bm336268,Bm249605,Bm192873,Bm153144,Bm107127,Bm153141,Bm107118,Bm058336,Bm313808,Bm211491,Bm270596,Bm048032,Bm265062,Bm321404,Bm130587,Bm327191,Bm247343,Bm135809,Bm188447,Bm084758,Bm061425,Bm0…	0.052024169
Biological process	indole-containing compound metabolic process	GO:0042430	5	0.005343007	2.816131496	9	1285	321	129068	Bm276470,Bm075533,Bm030896,Bm084885,Bm226426,Bm293404,Bm223277,Bm224493,Bm287580,	0.05223062
Biological process	organic substance catabolic process	GO:1901575	4	0.005654738	1.696279206	27	6400	321	129068	Bm028745,Bm258941,Bm202707,Bm202706,Bm044071,Bm276470,Bm044069,Bm198649,Bm199721,Bm199724,Bm022381,Bm051463,Bm030896,Bm269319,Bm059439,Bm279466,Bm163277,Bm260314,Bm223277,Bm026459,Bm205788,Bm007668,Bm287580,Bm328855,Bm217227,Bm249095,Bm007294,	0.054719588
Biological process	response to external biotic stimulus	GO:0043207	4	0.00567203	2.361709233	12	2043	321	129068	Bm067035,Bm321404,Bm286965,Bm237272,Bm205788,Bm237270,Bm043623,Bm043624,Bm151405,Bm328855,Bm152925,Bm136214,	0.054338045
Biological process	response to other organism	GO:0051707	5	0.00567203	2.361709233	12	2043	321	129068	Bm067035,Bm321404,Bm286965,Bm237272,Bm205788,Bm237270,Bm043623,Bm043624,Bm151405,Bm328855,Bm152925,Bm136214,	0.054338045
Biological process	organic cyclic compound biosynthetic process	GO:1901362	5	0.005886791	1.324459994	74	22465	321	129068	Bm335691,Bm132841,Bm142777,Bm322255,Bm189608,Bm208359,Bm131783,Bm106764,Bm321374,Bm276470,Bm244355,Bm016966,Bm075533,Bm085235,Bm108635,Bm298150,Bm324606,Bm099987,Bm260524,Bm238958,Bm213897,Bm243182,Bm153141,Bm051463,Bm082774,Bm146636,Bm236884,Bm131268,Bm327191,Bm084885,Bm226426,Bm163285,Bm293404,Bm316395,Bm223277,Bm062753,Bm152393,Bm044308,Bm179494,Bm044781,Bm224493,Bm295376,Bm294166,Bm176082,Bm1…	0.055289666
Biological process	heterocycle catabolic process	GO:0046700	5	0.006403359	2.56756703	10	1566	321	129068	Bm028745,Bm258941,Bm202707,Bm202706,Bm044071,Bm044069,Bm199724,Bm059439,Bm279466,Bm260314,	0.057871869
Biological process	cellular catabolic process	GO:0044248	4	0.006464104	1.79536877	22	4927	321	129068	Bm028745,Bm258941,Bm202707,Bm202706,Bm044071,Bm276470,Bm044069,Bm199724,Bm051463,Bm030896,Bm059439,Bm279466,Bm260314,Bm314189,Bm335606,Bm303363,Bm287580,Bm217227,Bm092941,Bm300249,Bm007294,Bm098253,	0.056812948
Biological process	response to biotic stimulus	GO:0009607	3	0.006519391	2.228070315	13	2346	321	129068	Bm067035,Bm321404,Bm286965,Bm237272,Bm205788,Bm237270,Bm043623,Bm043624,Bm151405,Bm125245,Bm328855,Bm152925,Bm136214,	0.056777966
Biological process	carbohydrate derivative catabolic process	GO:1901136	5	0.006935734	4.250327663	5	473	321	129068	Bm198649,Bm026459,Bm007668,Bm328855,Bm249095,	0.059859761
Biological process	amine biosynthetic process	GO:0009309	6	0.00713691	3.590008901	6	672	321	129068	Bm075533,Bm084885,Bm226426,Bm293404,Bm223277,Bm224493,	0.061046066
Biological process	biogenic amine biosynthetic process	GO:0042401	7	0.00713691	3.590008901	6	672	321	129068	Bm075533,Bm084885,Bm226426,Bm293404,Bm223277,Bm224493,	0.061046066
Molecular function	transferase activity, transferring alkyl or aryl (other than methyl) groups	GO:0016765	4	0.007541132	3.550060106	6	647	378	144704	Bm075533,Bm084885,Bm226426,Bm293404,Bm224493,Bm125245,	0.082555547
Biological process	protein glycosylation	GO:0006486	7	0.008231039	3.481220752	6	693	321	129068	Bm036367,Bm125395,Bm243916,Bm219933,Bm248397,Bm325152,	0.066263319
Biological process	macromolecule glycosylation	GO:0043413	6	0.008231039	3.481220752	6	693	321	129068	Bm036367,Bm125395,Bm243916,Bm219933,Bm248397,Bm325152,	0.066263319
Biological process	regulation of RNA metabolic process	GO:0051252	7	0.008363327	1.420780908	48	13584	321	129068	Bm335691,Bm142777,Bm189608,Bm208359,Bm131783,Bm106764,Bm321374,Bm085235,Bm108635,Bm298150,Bm324606,Bm099987,Bm260524,Bm238958,Bm213897,Bm243182,Bm153141,Bm082774,Bm146636,Bm236884,Bm327191,Bm163285,Bm316395,Bm062753,Bm152393,Bm044308,Bm044781,Bm294166,Bm176082,Bm099049,Bm028266,Bm019882,Bm335606,Bm046680,Bm215384,Bm083091,Bm287347,Bm092941,Bm310190,Bm163718,Bm034650,Bm076580,Bm117876,Bm300249,Bm2…	0.066215429
Biological process	purine nucleobase metabolic process	GO:0006144	8	0.008850929	2.012417402	15	2997	321	129068	Bm132841,Bm322255,Bm211749,Bm131783,Bm244355,Bm016966,Bm179494,Bm065396,Bm177279,Bm177278,Bm138664,Bm016913,Bm233743,Bm241018,Bm217034,	0.068380566
Biological process	defense response to other organism	GO:0098542	6	0.008933696	2.441293242	10	1647	321	129068	Bm067035,Bm237272,Bm205788,Bm237270,Bm043623,Bm043624,Bm151405,Bm328855,Bm152925,Bm136214,	0.068467849
Biological process	nucleobase-containing compound transport	GO:0015931	6	0.009113775	3.97313238	5	506	321	129068	Bm049752,Bm107127,Bm107118,Bm331461,Bm001533,	0.068748007
Biological process	regulation of nucleobase-containing compound metabolic process	GO:0019219	6	0.010280657	1.404138803	48	13745	321	129068	Bm335691,Bm142777,Bm189608,Bm208359,Bm131783,Bm106764,Bm321374,Bm085235,Bm108635,Bm298150,Bm324606,Bm099987,Bm260524,Bm238958,Bm213897,Bm243182,Bm153141,Bm082774,Bm146636,Bm236884,Bm327191,Bm163285,Bm316395,Bm062753,Bm152393,Bm044308,Bm044781,Bm294166,Bm176082,Bm099049,Bm028266,Bm019882,Bm335606,Bm046680,Bm215384,Bm083091,Bm287347,Bm092941,Bm310190,Bm163718,Bm034650,Bm076580,Bm117876,Bm300249,Bm2…	0.076347828
Biological process	alpha-amino acid biosynthetic process	GO:1901607	9	0.010922482	2.366574437	10	1699	321	129068	Bm131783,Bm202712,Bm075533,Bm279466,Bm084885,Bm226426,Bm293404,Bm223277,Bm224493,Bm297661,	0.080490288
Molecular function	hexosyltransferase activity	GO:0016758	5	0.011180206	2.081385442	13	2391	378	144704	Bm036367,Bm125395,Bm058326,Bm112937,Bm092014,Bm243916,Bm219933,Bm248397,Bm325152,Bm063252,Bm287523,Bm163718,Bm139610,	0.103354789
Molecular function	transcription regulator activity	GO:0140110	2	0.01137929	1.590800655	28	6738	378	144704	Bm335691,Bm189608,Bm208359,Bm106764,Bm321374,Bm324606,Bm260524,Bm153141,Bm146636,Bm236884,Bm163285,Bm316395,Bm152393,Bm044308,Bm294166,Bm099049,Bm019882,Bm335606,Bm046680,Bm083091,Bm287347,Bm092941,Bm310190,Bm034650,Bm076580,Bm117876,Bm169368,Bm098253,	0.102908364
Cellular component	RNA polymerase complex	GO:0030880	6	0.012426285	2.445094409	9	1480	219	88056	Bm132841,Bm016966,Bm131268,Bm179494,Bm177279,Bm177278,Bm138664,Bm016913,Bm233743,	0.574715672
Molecular function	endonuclease activity	GO:0004519	6	0.012680085	2.617537195	8	1170	378	144704	Bm028745,Bm202707,Bm202706,Bm044071,Bm044069,Bm199724,Bm059439,Bm260314,	0.112232239
Biological process	glycosylation	GO:0070085	3	0.012747853	3.161842702	6	763	321	129068	Bm036367,Bm125395,Bm243916,Bm219933,Bm248397,Bm325152,	0.08979738
Biological process	sulfur compound biosynthetic process	GO:0044272	5	0.012747853	3.161842702	6	763	321	129068	Bm202712,Bm075533,Bm084885,Bm293404,Bm224493,Bm297661,	0.08979738
Biological process	aromatic amino acid metabolic process	GO:0009072	8	0.014209923	2.27036136	10	1771	321	129068	Bm047463,Bm276470,Bm075533,Bm030896,Bm084885,Bm226426,Bm293404,Bm223277,Bm224493,Bm287580,	0.097936019
Biological process	protein ubiquitination	GO:0016567	10	0.016441395	2.217766116	10	1813	321	129068	Bm312769,Bm030893,Bm307791,Bm228702,Bm271538,Bm044308,Bm294166,Bm097340,Bm244752,Bm145063,	0.112506117
Biological process	glycoprotein biosynthetic process	GO:0009101	7	0.016613013	2.978377755	6	810	321	129068	Bm036367,Bm125395,Bm243916,Bm219933,Bm248397,Bm325152,	0.112874227
Cellular component	ubiquitin ligase complex	GO:0000151	5	0.016630712	2.4800752	8	1297	219	88056	Bm312769,Bm030893,Bm307791,Bm228702,Bm271538,Bm097340,Bm244752,Bm145063,	0.615336342
Biological process	viral process	GO:0016032	2	0.016858738	1.78004608	17	3840	321	129068	Bm132841,Bm047373,Bm199726,Bm108635,Bm298150,Bm030896,Bm084758,Bm174271,Bm179494,Bm007466,Bm177279,Bm177278,Bm032739,Bm328864,Bm053580,Bm007294,Bm098253,	0.113737117
Biological process	protein modification by small protein conjugation	GO:0032446	9	0.017887417	2.187600636	10	1838	321	129068	Bm312769,Bm030893,Bm307791,Bm228702,Bm271538,Bm044308,Bm294166,Bm097340,Bm244752,Bm145063,	0.115007689
Molecular function	catalytic activity	GO:0003824	2	0.0182056	1.103500516	221	76667	378	144704	Bm229166,Bm151126,Bm132841,Bm001139,Bm036367,Bm096546,Bm047373,Bm304825,Bm327945,Bm322255,Bm106305,Bm211749,Bm254590,Bm149035,Bm322483,Bm028745,Bm025595,Bm258941,Bm270991,Bm039619,Bm119602,Bm202707,Bm202706,Bm084465,Bm255438,Bm045054,Bm078907,Bm335125,Bm209449,Bm131783,Bm044071,Bm117894,Bm047463,Bm087962,Bm276470,Bm025547,Bm125395,Bm244355,Bm106598,Bm278659,Bm044069,Bm016966,Bm202712,Bm075533,Bm2…	0.140250545
Biological process	glycoprotein metabolic process	GO:0009100	6	0.018967153	2.889204768	6	835	321	129068	Bm036367,Bm125395,Bm243916,Bm219933,Bm248397,Bm325152,	0.121136885
Molecular function	heme binding	GO:0020037	5	0.019063873	1.999903255	12	2297	378	144704	Bm335125,Bm278659,Bm121690,Bm310656,Bm056329,Bm215340,Bm324050,Bm109035,Bm329730,Bm208619,Bm184315,Bm284014,	0.144192204
Biological process	tyrosine metabolic process	GO:0006570	9	0.021031933	2.563357904	7	1098	321	129068	Bm047463,Bm075533,Bm084885,Bm226426,Bm293404,Bm223277,Bm224493,	0.131690141
Molecular function	5'-3' RNA polymerase activity	GO:0034062	7	0.021155528	2.042174085	11	2062	378	144704	Bm132841,Bm244355,Bm016966,Bm179494,Bm177279,Bm177278,Bm138664,Bm016913,Bm227484,Bm233743,Bm217034,	0.154398243
Molecular function	RNA polymerase activity	GO:0097747	6	0.021155528	2.042174085	11	2062	378	144704	Bm132841,Bm244355,Bm016966,Bm179494,Bm177279,Bm177278,Bm138664,Bm016913,Bm227484,Bm233743,Bm217034,	0.154398243
Molecular function	hydro-lyase activity	GO:0016836	5	0.021505265	2.807932627	6	818	378	144704	Bm075533,Bm030896,Bm084885,Bm293404,Bm223277,Bm224493,	0.151630342
Biological process	amino acid biosynthetic process	GO:0008652	8	0.024846607	2.071514667	10	1941	321	129068	Bm131783,Bm202712,Bm075533,Bm279466,Bm084885,Bm226426,Bm293404,Bm223277,Bm224493,Bm297661,	0.150652213
Cellular component	anaphase-promoting complex	GO:0005680	7	0.025671422	2.451720682	7	1148	219	88056	Bm312769,Bm030893,Bm307791,Bm228702,Bm097340,Bm244752,Bm145063,	0.678459003
Cellular component	nuclear ubiquitin ligase complex	GO:0000152	6	0.025987202	2.445330445	7	1151	219	88056	Bm312769,Bm030893,Bm307791,Bm228702,Bm097340,Bm244752,Bm145063,	0.600954045
Molecular function	lyase activity	GO:0016829	3	0.027055989	1.717139624	16	3567	378	144704	Bm229166,Bm322483,Bm016966,Bm075533,Bm204913,Bm030896,Bm084885,Bm293404,Bm223277,Bm224493,Bm043623,Bm043624,Bm082879,Bm146058,Bm016913,Bm269923,	0.175863927
Biological process	amine metabolic process	GO:0009308	5	0.027603514	2.034822859	10	1976	321	129068	Bm254590,Bm276470,Bm075533,Bm030896,Bm084885,Bm226426,Bm293404,Bm223277,Bm224493,Bm287580,	0.166315511
Molecular function	tetrapyrrole binding	GO:0046906	4	0.027939937	1.888888889	12	2432	378	144704	Bm335125,Bm278659,Bm121690,Bm310656,Bm056329,Bm215340,Bm324050,Bm109035,Bm329730,Bm208619,Bm184315,Bm284014,	0.176106268
Biological process	nucleobase metabolic process	GO:0009112	7	0.029571487	1.73062122	15	3485	321	129068	Bm132841,Bm322255,Bm211749,Bm131783,Bm244355,Bm016966,Bm179494,Bm065396,Bm177279,Bm177278,Bm138664,Bm016913,Bm233743,Bm241018,Bm217034,	0.174873362
Biological process	biogenic amine metabolic process	GO:0006576	6	0.030549255	2.092960655	9	1729	321	129068	Bm276470,Bm075533,Bm030896,Bm084885,Bm226426,Bm293404,Bm223277,Bm224493,Bm287580,	0.179547154
Cellular component	cullin-RING ubiquitin ligase complex	GO:0031461	6	0.031767803	2.341576824	7	1202	219	88056	Bm312769,Bm030893,Bm307791,Bm228702,Bm097340,Bm244752,Bm145063,	0.653004832
Biological process	carboxylic acid biosynthetic process	GO:0046394	7	0.032237254	1.676647368	16	3837	321	129068	Bm322255,Bm078907,Bm131783,Bm276470,Bm202712,Bm075533,Bm156434,Bm279466,Bm084885,Bm226426,Bm293404,Bm223277,Bm224493,Bm297661,Bm287347,Bm287580,	0.188312741
Molecular function	ubiquitin-protein transferase activity	GO:0004842	7	0.033050132	1.974289917	10	1939	378	144704	Bm312769,Bm030893,Bm307791,Bm228702,Bm271538,Bm044308,Bm294166,Bm097340,Bm244752,Bm145063,	0.202189045
Molecular function	ubiquitin-like protein transferase activity	GO:0019787	6	0.03314777	1.973272241	10	1940	378	144704	Bm312769,Bm030893,Bm307791,Bm228702,Bm271538,Bm044308,Bm294166,Bm097340,Bm244752,Bm145063,	0.199847425
Biological process	organic acid biosynthetic process	GO:0016053	5	0.0334829	1.668385879	16	3856	321	129068	Bm322255,Bm078907,Bm131783,Bm276470,Bm202712,Bm075533,Bm156434,Bm279466,Bm084885,Bm226426,Bm293404,Bm223277,Bm224493,Bm297661,Bm287347,Bm287580,	0.194403748
Cellular component	transcription regulator complex	GO:0005667	3	0.03448766	1.456413623	26	7178	219	88056	Bm142777,Bm189608,Bm208359,Bm106764,Bm321374,Bm324606,Bm260524,Bm153141,Bm146636,Bm236884,Bm084885,Bm163285,Bm316395,Bm152393,Bm044308,Bm294166,Bm099049,Bm019882,Bm335606,Bm046680,Bm092941,Bm310190,Bm034650,Bm076580,Bm117876,Bm098253,	0.580019734
Biological process	response to hormone	GO:0009725	5	0.035488081	2.489665615	6	969	321	129068	Bm271857,Bm199721,Bm286928,Bm145256,Bm328855,Bm251273,	0.198816267
Biological process	cell development	GO:0048468	4	0.035630411	2.780643132	5	723	321	129068	Bm145256,Bm063244,Bm102444,Bm251273,Bm334467,	0.198453103
Molecular function	carbon-carbon lyase activity	GO:0016830	4	0.036311956	2.137137836	8	1433	378	144704	Bm229166,Bm322483,Bm075533,Bm084885,Bm293404,Bm224493,Bm082879,Bm269923,	0.201410313
Molecular function	sequence-specific DNA binding	GO:0043565	6	0.036936934	1.717758784	14	3120	378	144704	Bm106764,Bm324606,Bm146636,Bm236884,Bm163285,Bm044308,Bm044781,Bm294166,Bm019882,Bm335606,Bm046680,Bm092941,Bm076580,Bm098253,	0.202181113
Biological process	response to external stimulus	GO:0009605	3	0.037632011	1.674872245	15	3601	321	129068	Bm025547,Bm067035,Bm321404,Bm145256,Bm286965,Bm237272,Bm205788,Bm237270,Bm043623,Bm043624,Bm151405,Bm328855,Bm152925,Bm136214,Bm251273,	0.2036806
Biological process	regulation of primary metabolic process	GO:0080090	5	0.038313616	1.281152745	51	16006	321	129068	Bm335691,Bm142777,Bm189608,Bm208359,Bm131783,Bm106764,Bm321374,Bm085235,Bm108635,Bm298150,Bm324606,Bm324727,Bm099987,Bm260524,Bm238958,Bm213897,Bm243182,Bm153141,Bm082774,Bm146636,Bm236884,Bm327191,Bm163285,Bm316395,Bm062753,Bm152393,Bm044308,Bm044781,Bm294166,Bm176082,Bm099049,Bm028266,Bm019882,Bm335606,Bm046680,Bm215384,Bm083091,Bm287347,Bm097123,Bm092941,Bm310190,Bm163718,Bm034650,Bm076580,Bm1…	0.206204742
Cellular component	intracellular protein-containing complex	GO:0140535	3	0.038819503	1.480847143	23	6245	219	88056	Bm132841,Bm131783,Bm016966,Bm312769,Bm194274,Bm099987,Bm030893,Bm211491,Bm131268,Bm307791,Bm228702,Bm271538,Bm179494,Bm295376,Bm177279,Bm177278,Bm138664,Bm016913,Bm097340,Bm287347,Bm233743,Bm244752,Bm145063,	0.598467332
Molecular function	enzyme inhibitor activity	GO:0004857	4	0.038871215	2.435725227	6	943	378	144704	Bm324727,Bm081594,Bm185067,Bm188447,Bm032028,Bm011896,	0.207313148
Biological process	water-soluble vitamin metabolic process	GO:0006767	5	0.040391369	1.903792599	10	2112	321	129068	Bm322255,Bm075533,Bm051463,Bm156434,Bm084885,Bm293404,Bm224493,Bm315480,Bm146058,Bm217227,	0.212609514
Biological process	vitamin metabolic process	GO:0006766	4	0.042565941	1.885933381	10	2132	321	129068	Bm322255,Bm075533,Bm051463,Bm156434,Bm084885,Bm293404,Bm224493,Bm315480,Bm146058,Bm217227,	0.220422548
Biological process	response to stress	GO:0006950	3	0.043705417	1.372729318	32	9373	321	129068	Bm026559,Bm110921,Bm119600,Bm201618,Bm232359,Bm067035,Bm271682,Bm269319,Bm081594,Bm215856,Bm321404,Bm014259,Bm145955,Bm062753,Bm064700,Bm007466,Bm237272,Bm205788,Bm237270,Bm324050,Bm043623,Bm043989,Bm043624,Bm109035,Bm151405,Bm125245,Bm328855,Bm184315,Bm092941,Bm152925,Bm136214,Bm249095,	0.221533276
Biological process	regulation of metabolic process	GO:0019222	4	0.045803871	1.258952728	53	16927	321	129068	Bm335691,Bm142777,Bm086734,Bm189608,Bm208359,Bm131783,Bm106764,Bm321374,Bm085235,Bm108635,Bm298150,Bm324606,Bm324727,Bm099987,Bm260524,Bm238958,Bm213897,Bm243182,Bm153141,Bm082774,Bm146636,Bm236884,Bm327191,Bm163285,Bm316395,Bm062753,Bm152393,Bm044308,Bm044781,Bm314189,Bm294166,Bm176082,Bm099049,Bm028266,Bm019882,Bm335606,Bm046680,Bm215384,Bm083091,Bm287347,Bm097123,Bm092941,Bm310190,Bm163718,Bm0…	0.227358072
Molecular function	protein dimerization activity	GO:0046983	4	0.048075118	1.733501048	12	2650	378	144704	Bm133937,Bm142777,Bm327930,Bm185689,Bm150000,Bm330849,Bm188447,Bm189415,Bm081031,Bm275987,Bm005155,Bm300252,	0.243893282
Biological process	response to endogenous stimulus	GO:0009719	3	0.049671895	2.28888613	6	1054	321	129068	Bm271857,Bm199721,Bm286928,Bm145256,Bm328855,Bm251273,	0.244029103
Biological process	defense response	GO:0006952	4	0.049730237	1.77270179	11	2495	321	129068	Bm067035,Bm237272,Bm205788,Bm237270,Bm043623,Bm043624,Bm151405,Bm125245,Bm328855,Bm152925,Bm136214,	0.24306922
