# Supplementary material for: Variability in Leaf Color Induced by Chlorophyll Deficiency: Transcriptional Changes in Bamboo Leaves
Source: Preprints.org preprint supplement (doi:10.20944/preprints202311.0939.v2), 2023-12-27
Supplement: Supplementary file 2 [file supplementary › Table S8.tsv]

GO enrichment result													KEGG enrichment result
Class	GO_Name	GO_ID	GO_Level	P_value	EnrichmentScore	HitsGenesCountsInSelectedSet	HitsGenesCountsInBackground	AllGenesCountsInSelectedSet	AllGenesCountsInBackground	GenesOfSelectedSetInGOterm	corrected p-value(BH method)		Term Name	MainClass	GeneHitsInSelectedSet	AllGenesInSelectedSet	GeneHitsInBackground	AllGenesInBackground	p-value	enrichFactor	GeneListInSelectedSets	corrected p-value(BH method)
Cellular component	photosystem	GO:0009521	4	5.5E-17	13.79012253	25	1004	159	88056	Bm309161,Bm001140,Bm214946,Bm127578,Bm001696,Bm257582,Bm332942,Bm317004,Bm029962,Bm119113,Bm048901,Bm098042,Bm081857,Bm181666,Bm093773,Bm102468,Bm104521,Bm047885,Bm020182,Bm306730,Bm302460,Bm261262,Bm020383,Bm334341,Bm106609,	1.4E-17		Glyoxylate and dicarboxylate metabolism	A09100 Metabolism	37	135	1682	52948	1.31E-16	8.627630246	[Bm013041, Bm315242, Bm064110, Bm036482, Bm180624, Bm180625, Bm104035, Bm167697, Bm106397, Bm112897, Bm164725, Bm214243, Bm217398, Bm099475, Bm231769, Bm014956, Bm030869, Bm197256, Bm315230, Bm080392, Bm021919, Bm013038, Bm013355, Bm162297, Bm167440, Bm162352, Bm056146, Bm057256, Bm149310, Bm192628, Bm306436, Bm306438, Bm095581, Bm080119, Bm010887, Bm045141, Bm123407]	1.10E-17
Cellular component	photosynthetic membrane	GO:0034357	4	1.3E-17	17.81380231	45	1399	159	88056	Bm309161,Bm148081,Bm001140,Bm214946,Bm127578,Bm001696,Bm104035,Bm235747,Bm329062,Bm106397,Bm257582,Bm133550,Bm057256,Bm117136,Bm332942,Bm217805,Bm021919,Bm130126,Bm317004,Bm029962,Bm119113,Bm048901,Bm098042,Bm081857,Bm043200,Bm214243,Bm275416,Bm181666,Bm093773,Bm160955,Bm102468,Bm104521,Bm047885,Bm020182,Bm306730,Bm331154,Bm302460,Bm261262,Bm295267,Bm020383,Bm334341,Bm106609,Bm006080,Bm278843,Bm1…	9E-17		Photosynthesis	A09100 Metabolism	36	135	350	52948	1.92E-15	40.34133333	[Bm309161, Bm092601, Bm214946, Bm334341, Bm048901, Bm127578, Bm127571, Bm019102, Bm317004, Bm031990, Bm098042, Bm332942, Bm133550, Bm302460, Bm081857, Bm106773, Bm297719, Bm289880, Bm102468, Bm104521, Bm043569, Bm006080, Bm145017, Bm181666, Bm182214, Bm257582, Bm216695, Bm245694, Bm047885, Bm119113, Bm026248, Bm261262, Bm001140, Bm306730, Bm020383, Bm004053]	1.86E-16
Cellular component	plastid envelope	GO:0009526	5	1.4E-17	21.98335014	26	655	159	88056	Bm148081,Bm233779,Bm104035,Bm235747,Bm329062,Bm106397,Bm056146,Bm257582,Bm133550,Bm057256,Bm117136,Bm030869,Bm217805,Bm021919,Bm130126,Bm043200,Bm275416,Bm231769,Bm331154,Bm295267,Bm334341,Bm217398,Bm099475,Bm006080,Bm278843,Bm191274,	2.15E-16		Photosynthesis - antenna proteins	A09100 Metabolism	16	135	117	52948	1.02E-15	53.63520101	[Bm202394, Bm278843, Bm126430, Bm202397, Bm077986, Bm095358, Bm115736, Bm005927, Bm118618, Bm313245, Bm273934, Bm267059, Bm324646, Bm306011, Bm326967, Bm062631]	1.54E-16
Cellular component	chloroplast thylakoid	GO:0009534	8	3.3E-17	39.96576542	21	291	159	88056	Bm148081,Bm104035,Bm235747,Bm329062,Bm106397,Bm257582,Bm133550,Bm057256,Bm117136,Bm217805,Bm021919,Bm130126,Bm043200,Bm275416,Bm306730,Bm331154,Bm295267,Bm334341,Bm006080,Bm278843,Bm191274,	3.87E-16		Photosynthesis proteins	A09180 Brite Hierarchies	52	135	467	52948	1.11E-16	43.67191688	[Bm309161, Bm214946, Bm048901, Bm127578, Bm127571, Bm019102, Bm077986, Bm031990, Bm118618, Bm098042, Bm332942, Bm081857, Bm102468, Bm104521, Bm043569, Bm202394, Bm181666, Bm202397, Bm257582, Bm115736, Bm005927, Bm273934, Bm245694, Bm047885, Bm026248, Bm306011, Bm326967, Bm306730, Bm020383, Bm092601, Bm334341, Bm095358, Bm317004, Bm313245, Bm133550, Bm302460, Bm267059, Bm106773, Bm062631, Bm297719…	4.83E-15
Cellular component	chloroplast thylakoid membrane	GO:0009535	7	4.4E-17	42.27567334	20	262	159	88056	Bm148081,Bm104035,Bm235747,Bm329062,Bm106397,Bm257582,Bm133550,Bm057256,Bm117136,Bm217805,Bm021919,Bm130126,Bm043200,Bm275416,Bm331154,Bm295267,Bm334341,Bm006080,Bm278843,Bm191274,	3.069E-15		Metabolism	A09100 Metabolism	124	135	24353	52948	1.11E-16	1.997031927	[Bm309161, Bm199942, Bm036482, Bm048901, Bm265897, Bm106397, Bm019102, Bm077986, Bm031990, Bm098042, Bm164725, Bm081857, Bm191387, Bm231769, Bm047254, Bm060996, Bm102468, Bm104521, Bm043569, Bm281912, Bm167440, Bm056146, Bm257582, Bm149310, Bm192628, Bm081723, Bm080119, Bm047885, Bm326967, Bm306730, Bm180624, Bm025605, Bm180625, Bm095358, Bm313245, Bm133550, Bm302460, Bm112897, Bm214243, Bm106773…	4.83E-15
Cellular component	plastid	GO:0009536	6	4.1E-17	8.584743174	45	2903	159	88056	Bm148081,Bm034297,Bm049777,Bm233779,Bm045141,Bm104035,Bm235747,Bm078706,Bm329062,Bm277472,Bm106397,Bm056146,Bm257582,Bm192628,Bm133550,Bm269308,Bm057256,Bm117136,Bm332942,Bm030869,Bm217805,Bm021919,Bm130126,Bm191387,Bm033644,Bm043200,Bm032427,Bm275416,Bm010887,Bm156450,Bm242833,Bm231769,Bm148348,Bm149310,Bm047885,Bm306730,Bm331154,Bm064110,Bm295267,Bm334341,Bm217398,Bm099475,Bm006080,Bm278843,Bm1…	3.601E-15		Glycine, serine and threonine metabolism	A09100 Metabolism	28	135	925	52948	1.11E-16	11.87222422	[Bm013041, Bm315242, Bm064110, Bm036482, Bm180624, Bm180625, Bm167697, Bm164725, Bm214243, Bm217398, Bm099475, Bm231769, Bm014956, Bm030869, Bm315230, Bm080392, Bm013038, Bm013355, Bm167440, Bm162352, Bm056146, Bm149310, Bm306436, Bm306438, Bm095581, Bm010887, Bm045141, Bm123407]	4.83E-15
Cellular component	thylakoid	GO:0009579	6	7.5E-17	16.9672586	50	1632	159	88056	Bm309161,Bm148081,Bm001140,Bm214946,Bm127578,Bm001696,Bm045141,Bm104035,Bm235747,Bm329062,Bm277472,Bm106397,Bm257582,Bm133550,Bm057256,Bm117136,Bm332942,Bm217805,Bm021919,Bm130126,Bm317004,Bm029962,Bm119113,Bm048901,Bm098042,Bm081857,Bm043200,Bm214243,Bm275416,Bm010887,Bm181666,Bm093773,Bm160955,Bm102468,Bm104521,Bm149310,Bm047885,Bm020182,Bm306730,Bm331154,Bm302460,Bm261262,Bm064110,Bm295267,Bm0…	7.74E-16		Energy metabolism	A09100 Metabolism	81	135	5327	52948	2.22E-16	5.963731932	[Bm309161, Bm214946, Bm048901, Bm049518, Bm127578, Bm127571, Bm106397, Bm019102, Bm077986, Bm031990, Bm118618, Bm098042, Bm272557, Bm332942, Bm164725, Bm081857, Bm047254, Bm060996, Bm030869, Bm102468, Bm217805, Bm178139, Bm104521, Bm043569, Bm202394, Bm080392, Bm021919, Bm181666, Bm202397, Bm167440, Bm162352, Bm056146, Bm257582, Bm115736, Bm005927, Bm192628, Bm273934, Bm295267, Bm245694, Bm080119…	5.52E-15
Cellular component	thylakoid membrane	GO:0042651	5	5E-17	28.37853041	33	644	159	88056	Bm148081,Bm127578,Bm104035,Bm235747,Bm329062,Bm106397,Bm257582,Bm133550,Bm057256,Bm117136,Bm217805,Bm021919,Bm130126,Bm317004,Bm029962,Bm048901,Bm081857,Bm043200,Bm214243,Bm275416,Bm181666,Bm093773,Bm160955,Bm102468,Bm331154,Bm302460,Bm295267,Bm020383,Bm334341,Bm106609,Bm006080,Bm278843,Bm191274,	3.28E-15		Protein families: metabolism	A09180 Brite Hierarchies	68	135	8118	52948	2.22E-16	3.285304718	[Bm309161, Bm214946, Bm048901, Bm127578, Bm127571, Bm265897, Bm329171, Bm019102, Bm077986, Bm031990, Bm118618, Bm098042, Bm332942, Bm164725, Bm081857, Bm191387, Bm102468, Bm104521, Bm043569, Bm202394, Bm181666, Bm202397, Bm167440, Bm257582, Bm115736, Bm005927, Bm020828, Bm273934, Bm329993, Bm245694, Bm047885, Bm026248, Bm306011, Bm326967, Bm306730, Bm020383, Bm092601, Bm334341, Bm180624, Bm180625…	5.52E-15
Cellular component	apoplast	GO:0048046	4	7E-18	33.31195914	16	266	159	88056	Bm148081,Bm233779,Bm104035,Bm106397,Bm056146,Bm057256,Bm117136,Bm030869,Bm021919,Bm130126,Bm231769,Bm331154,Bm295267,Bm217398,Bm099475,Bm006080,	2.84E-16		Amino acid metabolism	A09100 Metabolism	37	135	5546	52948	3.04E-08	2.616601889	[Bm013041, Bm315242, Bm064110, Bm036482, Bm180624, Bm180625, Bm167697, Bm071584, Bm112897, Bm164725, Bm214243, Bm217398, Bm099475, Bm231769, Bm014956, Bm030869, Bm261093, Bm315230, Bm259422, Bm080392, Bm021919, Bm078706, Bm013038, Bm013355, Bm162297, Bm167440, Bm162352, Bm056146, Bm149310, Bm306436, Bm306438, Bm095581, Bm080119, Bm010887, Bm045141, Bm064764, Bm123407]	5.88E-07
Cellular component	plastid membrane	GO:0042170	5	4E-18	31.64636119	20	350	159	88056	Bm148081,Bm104035,Bm235747,Bm329062,Bm106397,Bm257582,Bm133550,Bm057256,Bm117136,Bm217805,Bm021919,Bm130126,Bm043200,Bm275416,Bm331154,Bm295267,Bm334341,Bm006080,Bm278843,Bm191274,	2.86E-16		Carbon fixation in photosynthetic organisms	A09100 Metabolism	16	135	1165	52948	5.44E-08	5.386539501	[Bm130126, Bm049518, Bm104035, Bm167697, Bm106397, Bm167440, Bm057256, Bm192628, Bm306436, Bm272557, Bm306438, Bm295267, Bm095581, Bm080119, Bm214243, Bm117136]	9.47E-07
Cellular component	chloroplast envelope	GO:0009941	6	3.6E-17	20.0314733	17	470	159	88056	Bm148081,Bm233779,Bm104035,Bm235747,Bm329062,Bm106397,Bm057256,Bm117136,Bm021919,Bm130126,Bm231769,Bm331154,Bm295267,Bm217398,Bm099475,Bm006080,Bm191274,	2.119E-15		One carbon pool by folate	A09100 Metabolism	7	135	255	52948	4.54E-06	10.76647785	[Bm013041, Bm217398, Bm080392, Bm013038, Bm030869, Bm162352, Bm056146]	7.17E-05
Cellular component	plastid thylakoid	GO:0031976	7	7.9E-17	39.96576542	21	291	159	88056	Bm148081,Bm104035,Bm235747,Bm329062,Bm106397,Bm257582,Bm133550,Bm057256,Bm117136,Bm217805,Bm021919,Bm130126,Bm043200,Bm275416,Bm306730,Bm331154,Bm295267,Bm334341,Bm006080,Bm278843,Bm191274,	1.956E-15		Carbohydrate metabolism	A09100 Metabolism	43	135	8733	52948	8.11E-06	1.931171249	[Bm013041, Bm315242, Bm064110, Bm036482, Bm180624, Bm025605, Bm180625, Bm049518, Bm104035, Bm167697, Bm106397, Bm272557, Bm112897, Bm164725, Bm214243, Bm217398, Bm099475, Bm231769, Bm014956, Bm030869, Bm197256, Bm315230, Bm074945, Bm080392, Bm189551, Bm021919, Bm013038, Bm013355, Bm162297, Bm167440, Bm162352, Bm056146, Bm057256, Bm091446, Bm149310, Bm192628, Bm306436, Bm306438, Bm095581, Bm080119…	1.18E-04
Cellular component	plastid thylakoid membrane	GO:0055035	6	2.4E-17	42.27567334	20	262	159	88056	Bm148081,Bm104035,Bm235747,Bm329062,Bm106397,Bm257582,Bm133550,Bm057256,Bm117136,Bm217805,Bm021919,Bm130126,Bm043200,Bm275416,Bm331154,Bm295267,Bm334341,Bm006080,Bm278843,Bm191274,	1.6E-16		Alanine, aspartate and glutamate metabolism	A09100 Metabolism	12	135	1069	52948	2.06E-05	4.402702422	[Bm306436, Bm306438, Bm180624, Bm095581, Bm180625, Bm164725, Bm214243, Bm021919, Bm167697, Bm078706, Bm167440, Bm123407]	2.75E-04
Cellular component	plastid stroma	GO:0009532	3	2.22E-16	21.20448751	17	444	159	88056	Bm148081,Bm034297,Bm233779,Bm104035,Bm106397,Bm257582,Bm192628,Bm133550,Bm057256,Bm117136,Bm021919,Bm130126,Bm242833,Bm331154,Bm295267,Bm334341,Bm006080,	2.79E-15		Amino acid related enzymes	A09180 Brite Hierarchies	11	135	1209	52948	2.87E-04	3.568471035	[Bm306436, Bm306438, Bm180624, Bm095581, Bm180625, Bm164725, Bm214243, Bm167697, Bm071584, Bm167440, Bm123407]	0.003562927
Cellular component	chloroplast stroma	GO:0009570	4	3.33E-16	22.25719256	17	423	159	88056	Bm148081,Bm034297,Bm233779,Bm104035,Bm106397,Bm257582,Bm192628,Bm133550,Bm057256,Bm117136,Bm021919,Bm130126,Bm242833,Bm331154,Bm295267,Bm334341,Bm006080,	3.91E-15		Methane metabolism	A09100 Metabolism	9	135	848	52948	3.46E-04	4.162578616	[Bm180624, Bm180625, Bm164725, Bm049518, Bm080392, Bm030869, Bm162352, Bm056146, Bm123407]	0.004009199
Biological process	photosynthesis	GO:0015979	4	3.33E-16	11.32883491	32	1482	246	129068	Bm309161,Bm001140,Bm214946,Bm127578,Bm001696,Bm104035,Bm329062,Bm106397,Bm257582,Bm057256,Bm332942,Bm317004,Bm029962,Bm119113,Bm048901,Bm098042,Bm081857,Bm043200,Bm181666,Bm093773,Bm102468,Bm104521,Bm047885,Bm020182,Bm306730,Bm302460,Bm261262,Bm020383,Bm334341,Bm106609,Bm006080,Bm278843,	2.51E-13		Arginine biosynthesis	A09100 Metabolism	7	135	533	52948	4.60E-04	5.150941561	[Bm306436, Bm306438, Bm095581, Bm214243, Bm021919, Bm167697, Bm167440]	0.005006164
Cellular component	chloroplast	GO:0009507	7	4.44E-16	11.54892667	43	2062	159	88056	Bm148081,Bm034297,Bm049777,Bm233779,Bm045141,Bm104035,Bm235747,Bm078706,Bm329062,Bm277472,Bm106397,Bm056146,Bm257582,Bm192628,Bm133550,Bm269308,Bm057256,Bm117136,Bm332942,Bm030869,Bm217805,Bm021919,Bm130126,Bm191387,Bm033644,Bm043200,Bm032427,Bm275416,Bm010887,Bm242833,Bm231769,Bm148348,Bm149310,Bm306730,Bm331154,Bm064110,Bm295267,Bm334341,Bm217398,Bm099475,Bm006080,Bm278843,Bm191274,	4.88E-15		MAPK signaling pathway - plant	A09130 Environmental Information Processing	7	135	963	52948	0.012032752	2.850936502	[Bm082757, Bm112897, Bm126278, Bm329171, Bm162297, Bm290935, Bm071642]	0.116316604
Cellular component	organelle outer membrane	GO:0031968	6	1.11E-15	10.6113483	21	1096	159	88056	Bm148081,Bm104035,Bm235747,Bm329062,Bm106397,Bm257582,Bm133550,Bm057256,Bm117136,Bm217805,Bm021919,Bm130126,Bm043200,Bm275416,Bm067833,Bm331154,Bm295267,Bm334341,Bm006080,Bm278843,Bm191274,	1.15E-14
Biological process	glycine catabolic process	GO:0006546	11	2.22E-15	85.85454545	9	55	246	129068	Bm045141,Bm056146,Bm030869,Bm010887,Bm231769,Bm149310,Bm064110,Bm217398,Bm099475,	8.37E-13
Biological process	serine family amino acid catabolic process	GO:0009071	10	2.22E-15	85.85454545	9	55	246	129068	Bm045141,Bm056146,Bm030869,Bm010887,Bm231769,Bm149310,Bm064110,Bm217398,Bm099475,	8.37E-13
Cellular component	stromule	GO:0010319	3	2.66E-15	123.0691824	8	36	159	88056	Bm148081,Bm233779,Bm056146,Bm117136,Bm030869,Bm130126,Bm331154,Bm295267,	2.61E-14
Biological process	response to cold	GO:0009409	5	3.38E-14	27.85840708	12	226	246	129068	Bm148081,Bm233779,Bm104035,Bm106397,Bm056146,Bm057256,Bm117136,Bm030869,Bm130126,Bm199942,Bm331154,Bm295267,	6.36E-12
Biological process	glycine decarboxylation via glycine cleavage system	GO:0019464	12	4.16E-14	262.3333333	6	12	246	129068	Bm045141,Bm056146,Bm030869,Bm010887,Bm149310,Bm064110,	6.28E-12
Cellular component	outer membrane	GO:0019867	4	3.84E-13	6.94907822	23	1833	159	88056	Bm148081,Bm036587,Bm104035,Bm235747,Bm329062,Bm106397,Bm257582,Bm133550,Bm057256,Bm117136,Bm217805,Bm021919,Bm130126,Bm033644,Bm043200,Bm275416,Bm067833,Bm331154,Bm295267,Bm334341,Bm006080,Bm278843,Bm191274,	3.56E-12
Biological process	response to temperature stimulus	GO:0009266	4	9.98E-13	20.91694352	12	301	246	129068	Bm148081,Bm233779,Bm104035,Bm106397,Bm056146,Bm057256,Bm117136,Bm030869,Bm130126,Bm199942,Bm331154,Bm295267,	1.25E-10
Cellular component	oxidoreductase complex	GO:1990204	4	3.46E-12	10.6887589	16	829	159	88056	Bm127578,Bm045141,Bm056146,Bm030869,Bm317004,Bm029962,Bm048901,Bm081857,Bm010887,Bm093773,Bm102468,Bm149310,Bm302460,Bm064110,Bm020383,Bm106609,	3.05E-11
Cellular component	photosystem II	GO:0009523	5	7.31E-12	11.34859264	15	732	159	88056	Bm127578,Bm001696,Bm332942,Bm317004,Bm029962,Bm048901,Bm081857,Bm093773,Bm102468,Bm047885,Bm020182,Bm306730,Bm302460,Bm020383,Bm106609,	6.13E-11
Cellular component	photosystem II oxygen evolving complex	GO:0009654	5	7.51E-12	26.37196765	10	210	159	88056	Bm127578,Bm317004,Bm029962,Bm048901,Bm081857,Bm093773,Bm102468,Bm302460,Bm020383,Bm106609,	6.00E-11
Cellular component	non-membrane-bounded organelle	GO:0043228	4	2.57E-11	2.094904649	72	19034	159	88056	Bm309161,Bm148081,Bm288262,Bm036587,Bm150164,Bm001140,Bm233779,Bm214946,Bm127578,Bm127571,Bm001696,Bm045141,Bm104035,Bm235747,Bm329062,Bm277472,Bm106397,Bm031990,Bm056146,Bm257582,Bm080119,Bm133550,Bm167415,Bm222262,Bm269308,Bm057256,Bm117136,Bm013041,Bm332942,Bm030869,Bm217805,Bm021919,Bm130126,Bm317004,Bm029962,Bm111752,Bm119113,Bm048901,Bm098042,Bm081857,Bm043200,Bm214243,Bm275416,Bm010887,Bm0…	1.97E-10
Cellular component	photosystem I	GO:0009522	5	4.52E-11	21.97663971	10	252	159	88056	Bm309161,Bm001140,Bm214946,Bm257582,Bm119113,Bm098042,Bm181666,Bm104521,Bm261262,Bm334341,	3.31E-10
Cellular component	intracellular non-membrane-bounded organelle	GO:0043232	5	4.95E-11	2.085309916	71	18856	159	88056	Bm309161,Bm148081,Bm288262,Bm036587,Bm150164,Bm001140,Bm233779,Bm214946,Bm127578,Bm127571,Bm001696,Bm045141,Bm104035,Bm235747,Bm329062,Bm277472,Bm106397,Bm031990,Bm056146,Bm257582,Bm133550,Bm167415,Bm222262,Bm269308,Bm057256,Bm117136,Bm013041,Bm332942,Bm030869,Bm217805,Bm021919,Bm130126,Bm317004,Bm029962,Bm111752,Bm119113,Bm048901,Bm098042,Bm081857,Bm043200,Bm214243,Bm275416,Bm010887,Bm022837,Bm1…	3.48E-10
Cellular component	organelle envelope	GO:0031967	4	6.81E-11	4.489014008	27	3331	159	88056	Bm148081,Bm233779,Bm104035,Bm235747,Bm329062,Bm106397,Bm056146,Bm257582,Bm133550,Bm057256,Bm117136,Bm030869,Bm217805,Bm021919,Bm130126,Bm043200,Bm275416,Bm231769,Bm067833,Bm331154,Bm295267,Bm334341,Bm217398,Bm099475,Bm006080,Bm278843,Bm191274,	4.61E-10
Cellular component	envelope	GO:0031975	3	2.43E-10	4.237150938	27	3529	159	88056	Bm148081,Bm233779,Bm104035,Bm235747,Bm329062,Bm106397,Bm056146,Bm257582,Bm133550,Bm057256,Bm117136,Bm030869,Bm217805,Bm021919,Bm130126,Bm043200,Bm275416,Bm231769,Bm067833,Bm331154,Bm295267,Bm334341,Bm217398,Bm099475,Bm006080,Bm278843,Bm191274,	1.58E-09
Biological process	obsolete oxidation-reduction process	GO:0055114	0	3.35E-10	2.227229188	65	15312	246	129068	Bm057191,Bm172075,Bm049777,Bm013355,Bm005745,Bm115471,Bm233779,Bm258994,Bm013213,Bm265165,Bm222793,Bm115177,Bm064764,Bm104035,Bm126278,Bm329062,Bm026502,Bm106397,Bm328069,Bm101819,Bm080119,Bm307232,Bm297719,Bm189551,Bm198381,Bm057256,Bm117136,Bm217805,Bm021919,Bm020828,Bm130126,Bm278031,Bm197256,Bm259422,Bm162297,Bm111752,Bm111751,Bm241968,Bm081723,Bm112897,Bm032427,Bm177066,Bm315242,Bm058514,Bm1…	3.61E-08
Biological process	photorespiration	GO:0009853	5	9.96E-10	109.3055556	5	24	246	129068	Bm104035,Bm106397,Bm056146,Bm057256,Bm030869,	9.39E-08
Cellular component	thylakoid lumen	GO:0031977	3	1.18E-09	57.29082628	6	58	159	88056	Bm104035,Bm277472,Bm106397,Bm133550,Bm057256,Bm006080,	7.16E-09
Biological process	glycine metabolic process	GO:0006544	10	1.56E-09	15.38611926	10	341	246	129068	Bm045141,Bm056146,Bm030869,Bm080392,Bm010887,Bm231769,Bm149310,Bm064110,Bm217398,Bm099475,	1.30E-07
Molecular function	pyridoxal phosphate binding	GO:0030170	6	1.70E-09	8.563995688	14	935	253	144704	Bm056146,Bm167440,Bm180624,Bm180625,Bm123407,Bm030869,Bm080392,Bm071584,Bm214243,Bm306436,Bm167697,Bm164725,Bm231769,Bm099475,	6.93E-07
Molecular function	vitamin B6 binding	GO:0070279	5	1.70E-09	8.563995688	14	935	253	144704	Bm056146,Bm167440,Bm180624,Bm180625,Bm123407,Bm030869,Bm080392,Bm071584,Bm214243,Bm306436,Bm167697,Bm164725,Bm231769,Bm099475,	6.93E-07
Cellular component	photosystem I reaction center	GO:0009538	4	2.44E-09	32.85321394	7	118	159	88056	Bm309161,Bm001140,Bm257582,Bm119113,Bm104521,Bm261262,Bm334341,	1.43E-08
Biological process	response to light stimulus	GO:0009416	5	3.75E-09	14.0285205	10	374	246	129068	Bm148081,Bm104035,Bm106397,Bm133550,Bm057256,Bm117136,Bm130126,Bm199942,Bm331154,Bm295267,	2.83E-07
Cellular component	bounding membrane of organelle	GO:0098588	5	4.97E-09	4.700904501	21	2474	159	88056	Bm148081,Bm104035,Bm235747,Bm329062,Bm106397,Bm257582,Bm133550,Bm057256,Bm117136,Bm217805,Bm021919,Bm130126,Bm043200,Bm275416,Bm067833,Bm331154,Bm295267,Bm334341,Bm006080,Bm278843,Bm191274,	2.82E-08
Biological process	response to radiation	GO:0009314	4	5.06E-09	13.59240069	10	386	246	129068	Bm148081,Bm104035,Bm106397,Bm133550,Bm057256,Bm117136,Bm130126,Bm199942,Bm331154,Bm295267,	3.47E-07
Molecular function	oxidoreductase activity	GO:0016491	3	5.31E-09	2.085310579	65	17828	253	144704	Bm034297,Bm049777,Bm005745,Bm115471,Bm233779,Bm258994,Bm013213,Bm222793,Bm115177,Bm064764,Bm104035,Bm126278,Bm329062,Bm162339,Bm026502,Bm106397,Bm328069,Bm101819,Bm080119,Bm133550,Bm307232,Bm297719,Bm189551,Bm198381,Bm057256,Bm117136,Bm217805,Bm021919,Bm020828,Bm130126,Bm278031,Bm267059,Bm197256,Bm259422,Bm162297,Bm111752,Bm111751,Bm241968,Bm081723,Bm112897,Bm032427,Bm177066,Bm058514,Bm155121,Bm3…	7.22E-07
Cellular component	plastoglobule	GO:0010287	3	1.85E-08	62.93310463	5	44	159	88056	Bm148081,Bm233779,Bm257582,Bm331154,Bm334341,	1.02E-07
Biological process	response to abiotic stimulus	GO:0009628	3	8.63E-08	6.230138535	14	1179	246	129068	Bm148081,Bm233779,Bm104035,Bm106397,Bm056146,Bm133550,Bm057256,Bm117136,Bm030869,Bm021919,Bm130126,Bm199942,Bm331154,Bm295267,	5.43E-06
Biological process	cellular metabolic compound salvage	GO:0043094	4	1.02E-07	45.22988506	5	58	246	129068	Bm104035,Bm106397,Bm056146,Bm057256,Bm030869,	5.91E-06
Molecular function	vitamin binding	GO:0019842	4	1.54E-07	5.944570132	14	1347	253	144704	Bm056146,Bm167440,Bm180624,Bm180625,Bm123407,Bm030869,Bm080392,Bm071584,Bm214243,Bm306436,Bm167697,Bm164725,Bm231769,Bm099475,	1.25E-05
Cellular component	membrane	GO:0016020	3	3.06E-07	1.426897742	106	41141	159	88056	Bm309161,Bm041717,Bm013362,Bm148081,Bm051745,Bm036587,Bm029928,Bm106773,Bm049777,Bm129106,Bm257606,Bm001140,Bm233779,Bm130867,Bm214946,Bm127578,Bm127571,Bm002425,Bm001696,Bm044056,Bm104035,Bm336003,Bm235747,Bm126278,Bm329062,Bm026502,Bm044946,Bm106397,Bm031990,Bm248753,Bm056146,Bm257582,Bm080119,Bm020713,Bm133550,Bm030529,Bm222262,Bm084624,Bm297719,Bm057256,Bm117136,Bm332942,Bm030869,Bm217805,Bm0…	1.54E-06
Cellular component	membrane protein complex	GO:0098796	3	3.62E-07	2.494966692	35	7769	159	88056	Bm309161,Bm106773,Bm001140,Bm214946,Bm127578,Bm127571,Bm001696,Bm126278,Bm031990,Bm056146,Bm257582,Bm332942,Bm030869,Bm317004,Bm029962,Bm119113,Bm048901,Bm098042,Bm081857,Bm214243,Bm042463,Bm181666,Bm093773,Bm160955,Bm102468,Bm104521,Bm047885,Bm020182,Bm306730,Bm302460,Bm261262,Bm020383,Bm334341,Bm106609,Bm182214,	1.77E-06
Cellular component	cytoplasm	GO:0005737	3	7.16E-07	1.748056905	65	20593	159	88056	Bm148081,Bm034297,Bm106773,Bm049777,Bm233779,Bm045141,Bm104035,Bm336003,Bm235747,Bm078706,Bm329062,Bm277472,Bm162339,Bm106397,Bm031990,Bm056146,Bm257582,Bm192628,Bm133550,Bm030529,Bm269308,Bm057256,Bm117136,Bm013282,Bm332942,Bm083431,Bm030869,Bm217805,Bm021919,Bm130126,Bm197256,Bm111752,Bm111751,Bm191387,Bm033644,Bm043200,Bm032427,Bm042463,Bm275416,Bm010887,Bm156450,Bm253980,Bm242833,Bm199942,Bm0…	3.41E-06
Molecular function	antioxidant activity	GO:0016209	2	5.31E-06	5.133456118	12	1337	253	144704	Bm115471,Bm222793,Bm115177,Bm126278,Bm162297,Bm111752,Bm111751,Bm081723,Bm112897,Bm177066,Bm270905,Bm127500,	2.41E-04
Cellular component	organelle membrane	GO:0031090	4	7.39E-06	2.664091403	25	5197	159	88056	Bm148081,Bm104035,Bm336003,Bm235747,Bm329062,Bm106397,Bm056146,Bm257582,Bm133550,Bm057256,Bm117136,Bm030869,Bm217805,Bm021919,Bm130126,Bm043200,Bm275416,Bm077986,Bm067833,Bm331154,Bm295267,Bm334341,Bm006080,Bm278843,Bm191274,	3.42E-05
Biological process	serine family amino acid metabolic process	GO:0009069	9	7.86E-06	3.567733333	17	2500	246	129068	Bm045141,Bm056146,Bm083431,Bm030869,Bm080392,Bm278031,Bm042463,Bm010887,Bm081531,Bm231769,Bm149310,Bm035650,Bm064110,Bm217398,Bm099475,Bm263129,Bm135383,	4.23E-04
Cellular component	organelle	GO:0043226	3	8.17E-06	1.364426197	103	41807	159	88056	Bm309161,Bm148081,Bm034297,Bm288262,Bm036587,Bm106773,Bm049777,Bm150164,Bm001140,Bm233779,Bm214946,Bm127578,Bm127571,Bm001696,Bm045141,Bm064764,Bm104035,Bm336003,Bm235747,Bm078706,Bm329062,Bm277472,Bm162339,Bm106397,Bm031990,Bm056146,Bm257582,Bm192628,Bm080119,Bm133550,Bm167415,Bm030529,Bm222262,Bm145534,Bm269308,Bm057256,Bm117136,Bm013041,Bm332942,Bm083431,Bm030869,Bm217805,Bm021919,Bm130126,Bm3…	3.69E-05
Cellular component	intracellular organelle	GO:0043229	4	1.09E-05	1.36232376	102	41465	159	88056	Bm309161,Bm148081,Bm034297,Bm288262,Bm036587,Bm106773,Bm049777,Bm150164,Bm001140,Bm233779,Bm214946,Bm127578,Bm127571,Bm001696,Bm045141,Bm064764,Bm104035,Bm336003,Bm235747,Bm078706,Bm329062,Bm277472,Bm162339,Bm106397,Bm031990,Bm056146,Bm257582,Bm192628,Bm133550,Bm167415,Bm030529,Bm222262,Bm145534,Bm269308,Bm057256,Bm117136,Bm013041,Bm332942,Bm083431,Bm030869,Bm217805,Bm021919,Bm130126,Bm317004,Bm0…	4.78E-05
Molecular function	ion binding	GO:0043167	3	1.38E-05	1.401388589	113	46119	253	144704	Bm148081,Bm258849,Bm332195,Bm051745,Bm034297,Bm288262,Bm036587,Bm115471,Bm001696,Bm196583,Bm064764,Bm104035,Bm235747,Bm297062,Bm126278,Bm078706,Bm329062,Bm044946,Bm106397,Bm329171,Bm007516,Bm056146,Bm167440,Bm192628,Bm101819,Bm180624,Bm180625,Bm133550,Bm167415,Bm167416,Bm222262,Bm307232,Bm084624,Bm297719,Bm074945,Bm145534,Bm198381,Bm057256,Bm108304,Bm123407,Bm293536,Bm083431,Bm030869,Bm080392,Bm0…	5.62E-04
Biological process	alpha-amino acid catabolic process	GO:1901606	9	1.40E-05	5.093851133	11	1133	246	129068	Bm045141,Bm329062,Bm056146,Bm030869,Bm010887,Bm149566,Bm231769,Bm149310,Bm064110,Bm217398,Bm099475,	6.59E-04
Biological process	amino acid catabolic process	GO:0009063	8	1.50E-05	5.053706947	11	1142	246	129068	Bm045141,Bm329062,Bm056146,Bm030869,Bm010887,Bm149566,Bm231769,Bm149310,Bm064110,Bm217398,Bm099475,	6.67E-04
Cellular component	cytosolic ribosome	GO:0022626	7	1.72E-05	8.810634648	7	440	159	88056	Bm104035,Bm106397,Bm056146,Bm057256,Bm030869,Bm021919,Bm217398,	7.39E-05
Biological process	oxoacid metabolic process	GO:0043436	5	2.00E-05	1.942206152	43	11616	246	129068	Bm049777,Bm049518,Bm258994,Bm045141,Bm064764,Bm104035,Bm329062,Bm106397,Bm056146,Bm192628,Bm080119,Bm074945,Bm057256,Bm083431,Bm030869,Bm080392,Bm021919,Bm071584,Bm278031,Bm197256,Bm162297,Bm112897,Bm214243,Bm032427,Bm042463,Bm010887,Bm272557,Bm058514,Bm081531,Bm155121,Bm167697,Bm199942,Bm149566,Bm231769,Bm281912,Bm149310,Bm035650,Bm064110,Bm217398,Bm099475,Bm263129,Bm191274,Bm135383,	7.53E-04
Biological process	organic acid metabolic process	GO:0006082	4	2.17E-05	1.935541066	43	11656	246	129068	Bm049777,Bm049518,Bm258994,Bm045141,Bm064764,Bm104035,Bm329062,Bm106397,Bm056146,Bm192628,Bm080119,Bm074945,Bm057256,Bm083431,Bm030869,Bm080392,Bm021919,Bm071584,Bm278031,Bm197256,Bm162297,Bm112897,Bm214243,Bm032427,Bm042463,Bm010887,Bm272557,Bm058514,Bm081531,Bm155121,Bm167697,Bm199942,Bm149566,Bm231769,Bm281912,Bm149310,Bm035650,Bm064110,Bm217398,Bm099475,Bm263129,Bm191274,Bm135383,	7.78E-04
Molecular function	metal ion binding	GO:0046872	5	2.39E-05	1.647036904	65	22572	253	144704	Bm258849,Bm034297,Bm115471,Bm001696,Bm196583,Bm064764,Bm104035,Bm235747,Bm126278,Bm078706,Bm106397,Bm329171,Bm007516,Bm056146,Bm192628,Bm101819,Bm180624,Bm133550,Bm167415,Bm167416,Bm222262,Bm307232,Bm145534,Bm057256,Bm293536,Bm030869,Bm020828,Bm101735,Bm029962,Bm093491,Bm111752,Bm047261,Bm111751,Bm048901,Bm241968,Bm081857,Bm033644,Bm042463,Bm066376,Bm081531,Bm155121,Bm124876,Bm091446,Bm329993,Bm0…	8.13E-04
Biological process	carboxylic acid metabolic process	GO:0019752	6	3.72E-05	1.910194175	42	11536	246	129068	Bm049777,Bm049518,Bm045141,Bm064764,Bm104035,Bm329062,Bm106397,Bm056146,Bm192628,Bm080119,Bm074945,Bm057256,Bm083431,Bm030869,Bm080392,Bm021919,Bm071584,Bm278031,Bm197256,Bm162297,Bm112897,Bm214243,Bm032427,Bm042463,Bm010887,Bm272557,Bm058514,Bm081531,Bm155121,Bm167697,Bm199942,Bm149566,Bm231769,Bm281912,Bm149310,Bm035650,Bm064110,Bm217398,Bm099475,Bm263129,Bm191274,Bm135383,	0.001122438
Molecular function	monooxygenase activity	GO:0004497	4	4.42E-05	5.552937565	9	927	253	144704	Bm104035,Bm106397,Bm057256,Bm197256,Bm259422,Bm058514,Bm285027,Bm285029,Bm265897,	0.001289086
Biological process	L-serine metabolic process	GO:0006563	10	4.54E-05	9.568389058	6	329	246	129068	Bm056146,Bm030869,Bm080392,Bm231769,Bm217398,Bm099475,	0.001317125
Molecular function	cation binding	GO:0043169	4	4.64E-05	1.61232184	65	23058	253	144704	Bm258849,Bm034297,Bm115471,Bm001696,Bm196583,Bm064764,Bm104035,Bm235747,Bm126278,Bm078706,Bm106397,Bm329171,Bm007516,Bm056146,Bm192628,Bm101819,Bm180624,Bm133550,Bm167415,Bm167416,Bm222262,Bm307232,Bm145534,Bm057256,Bm293536,Bm030869,Bm020828,Bm101735,Bm029962,Bm093491,Bm111752,Bm047261,Bm111751,Bm048901,Bm241968,Bm081857,Bm033644,Bm042463,Bm066376,Bm081531,Bm155121,Bm124876,Bm091446,Bm329993,Bm0…	0.001262512
Biological process	carbon fixation	GO:0015977	4	4.74E-05	12.98679868	5	202	246	129068	Bm104035,Bm106397,Bm192628,Bm080119,Bm057256,	0.001324486
Biological process	response to stress	GO:0006950	3	4.95E-05	2.015149899	36	9373	246	129068	Bm148081,Bm288262,Bm106773,Bm115471,Bm233779,Bm104035,Bm126278,Bm106397,Bm031990,Bm296846,Bm056146,Bm222262,Bm057256,Bm117136,Bm013041,Bm030869,Bm021919,Bm016562,Bm130126,Bm162297,Bm111752,Bm111751,Bm294142,Bm081723,Bm112897,Bm092424,Bm124876,Bm199942,Bm231769,Bm152841,Bm331154,Bm127500,Bm295267,Bm099475,Bm006080,Bm182214,	0.001333888
Biological process	carboxylic acid catabolic process	GO:0046395	7	5.81E-05	4.349158503	11	1327	246	129068	Bm045141,Bm329062,Bm056146,Bm030869,Bm010887,Bm149566,Bm231769,Bm149310,Bm064110,Bm217398,Bm099475,	0.001511021
Biological process	organic acid catabolic process	GO:0016054	5	5.81E-05	4.349158503	11	1327	246	129068	Bm045141,Bm329062,Bm056146,Bm030869,Bm010887,Bm149566,Bm231769,Bm149310,Bm064110,Bm217398,Bm099475,	0.001511021
Molecular function	NAD binding	GO:0051287	8	8.33E-05	4.177608407	11	1506	253	144704	Bm013355,Bm080119,Bm117136,Bm130126,Bm315242,Bm315230,Bm149566,Bm281912,Bm014956,Bm295267,Bm191274,	0.001887735
Biological process	cellular response to external stimulus	GO:0071496	4	8.53E-05	8.531165312	6	369	246	129068	Bm106773,Bm031990,Bm231769,Bm331154,Bm099475,Bm182214,	0.002009839
Biological process	cellular response to extracellular stimulus	GO:0031668	5	8.53E-05	8.531165312	6	369	246	129068	Bm106773,Bm031990,Bm231769,Bm331154,Bm099475,Bm182214,	0.002009839
Biological process	response to cadmium ion	GO:0046686	6	9.73E-05	8.328042328	6	378	246	129068	Bm056146,Bm030869,Bm021919,Bm231769,Bm217398,Bm099475,	0.002157147
Biological process	obsolete peroxidase reaction	GO:0006804	0	1.00E-04	5.679747406	8	739	246	129068	Bm115471,Bm126278,Bm162297,Bm111752,Bm111751,Bm081723,Bm112897,Bm127500,	0.002155575
Biological process	small molecule catabolic process	GO:0044282	4	1.00E-04	4.087346553	11	1412	246	129068	Bm045141,Bm329062,Bm056146,Bm030869,Bm010887,Bm149566,Bm231769,Bm149310,Bm064110,Bm217398,Bm099475,	0.002098742
Cellular component	extracellular region	GO:0005576	3	1.07E-04	2.217633504	26	6493	159	88056	Bm148081,Bm106773,Bm001140,Bm233779,Bm104035,Bm106397,Bm031990,Bm056146,Bm030529,Bm057256,Bm117136,Bm030869,Bm021919,Bm130126,Bm111752,Bm111751,Bm156321,Bm305426,Bm231769,Bm331154,Bm295267,Bm217398,Bm099475,Bm006080,Bm182214,Bm021572,	4.48E-04
Biological process	response to metal ion	GO:0010038	5	1.09E-04	6.605515588	7	556	246	129068	Bm056146,Bm133550,Bm030869,Bm021919,Bm231769,Bm217398,Bm099475,	0.002212019
Cellular component	intracellular membrane-bounded organelle	GO:0043231	5	1.19E-04	1.436679778	75	28911	159	88056	Bm148081,Bm034297,Bm106773,Bm049777,Bm150164,Bm233779,Bm127571,Bm045141,Bm064764,Bm104035,Bm336003,Bm235747,Bm078706,Bm329062,Bm277472,Bm162339,Bm106397,Bm031990,Bm056146,Bm257582,Bm192628,Bm133550,Bm030529,Bm145534,Bm269308,Bm057256,Bm117136,Bm013041,Bm332942,Bm083431,Bm030869,Bm217805,Bm021919,Bm130126,Bm111752,Bm111751,Bm098042,Bm191387,Bm033644,Bm043200,Bm217605,Bm032427,Bm042463,Bm275416,Bm0…	4.89E-04
Molecular function	oxidoreductase activity, acting on peroxide as acceptor	GO:0016684	4	1.57E-04	5.320489016	8	860	253	144704	Bm115471,Bm126278,Bm162297,Bm111752,Bm111751,Bm081723,Bm112897,Bm127500,	0.00336423
Molecular function	peroxidase activity	GO:0004601	5	1.57E-04	5.320489016	8	860	253	144704	Bm115471,Bm126278,Bm162297,Bm111752,Bm111751,Bm081723,Bm112897,Bm127500,	0.00336423
Cellular component	membrane-bounded organelle	GO:0043227	4	1.85E-04	1.419010251	75	29271	159	88056	Bm148081,Bm034297,Bm106773,Bm049777,Bm150164,Bm233779,Bm127571,Bm045141,Bm064764,Bm104035,Bm336003,Bm235747,Bm078706,Bm329062,Bm277472,Bm162339,Bm106397,Bm031990,Bm056146,Bm257582,Bm192628,Bm133550,Bm030529,Bm145534,Bm269308,Bm057256,Bm117136,Bm013041,Bm332942,Bm083431,Bm030869,Bm217805,Bm021919,Bm130126,Bm111752,Bm111751,Bm098042,Bm191387,Bm033644,Bm043200,Bm217605,Bm032427,Bm042463,Bm275416,Bm0…	7.39E-04
Biological process	amino acid metabolic process	GO:0006520	7	2.22E-04	1.986888183	31	8186	246	129068	Bm045141,Bm064764,Bm329062,Bm056146,Bm074945,Bm083431,Bm030869,Bm080392,Bm021919,Bm071584,Bm278031,Bm197256,Bm162297,Bm112897,Bm214243,Bm032427,Bm042463,Bm010887,Bm058514,Bm081531,Bm167697,Bm149566,Bm231769,Bm149310,Bm035650,Bm064110,Bm217398,Bm099475,Bm263129,Bm191274,Bm135383,	0.004403803
Biological process	small molecule metabolic process	GO:0044281	3	2.24E-04	1.571655835	59	19696	246	129068	Bm106773,Bm049777,Bm049518,Bm127571,Bm258994,Bm045141,Bm064764,Bm104035,Bm329062,Bm106397,Bm031990,Bm248753,Bm056146,Bm192628,Bm080119,Bm074945,Bm057256,Bm117136,Bm083431,Bm030869,Bm217805,Bm080392,Bm021919,Bm130126,Bm071584,Bm278031,Bm197256,Bm162297,Bm191387,Bm112897,Bm214243,Bm032427,Bm042463,Bm010887,Bm022837,Bm272557,Bm058514,Bm081531,Bm155121,Bm167697,Bm280081,Bm199942,Bm149566,Bm285027,Bm2…	0.004334528
Molecular function	heme binding	GO:0020037	5	2.40E-04	3.236997562	13	2297	253	144704	Bm115471,Bm101819,Bm307232,Bm217805,Bm020828,Bm162297,Bm111752,Bm111751,Bm112897,Bm329993,Bm265897,Bm315318,Bm127500,	0.004666205
Molecular function	oxidoreductase activity, acting on the aldehyde or oxo group of donors, NAD or NADP as acceptor	GO:0016620	5	2.91E-04	6.795476069	6	505	253	144704	Bm064764,Bm080119,Bm117136,Bm130126,Bm295267,Bm191274,	0.005400073
Biological process	alpha-amino acid metabolic process	GO:1901605	8	3.19E-04	2.065315644	27	6859	246	129068	Bm045141,Bm064764,Bm329062,Bm056146,Bm083431,Bm030869,Bm080392,Bm021919,Bm278031,Bm197256,Bm162297,Bm112897,Bm042463,Bm010887,Bm058514,Bm081531,Bm167697,Bm149566,Bm231769,Bm149310,Bm035650,Bm064110,Bm217398,Bm099475,Bm263129,Bm191274,Bm135383,	0.005869607
Cellular component	extrinsic component of membrane	GO:0019898	3	3.28E-04	5.475535657	7	708	159	88056	Bm029962,Bm048901,Bm081857,Bm093773,Bm102468,Bm020383,Bm106609,	0.001282088
Molecular function	hexosyltransferase activity	GO:0016758	5	3.51E-04	3.109737934	13	2391	253	144704	Bm336006,Bm336003,Bm126278,Bm248753,Bm030529,Bm074945,Bm217805,Bm176040,Bm285027,Bm285029,Bm265769,Bm289875,Bm149586,	0.006224563
Cellular component	intracellular anatomical structure	GO:0005622	3	3.69E-04	1.247166743	108	47958	159	88056	Bm309161,Bm148081,Bm034297,Bm288262,Bm036587,Bm106773,Bm049777,Bm150164,Bm001140,Bm233779,Bm214946,Bm127578,Bm127571,Bm001696,Bm196583,Bm045141,Bm064764,Bm104035,Bm336003,Bm235747,Bm078706,Bm329062,Bm277472,Bm162339,Bm106397,Bm031990,Bm056146,Bm257582,Bm192628,Bm133550,Bm167415,Bm167416,Bm030529,Bm222262,Bm145534,Bm269308,Bm057256,Bm117136,Bm013041,Bm013282,Bm332942,Bm083431,Bm030869,Bm217805,Bm0…	0.001410929
Biological process	response to extracellular stimulus	GO:0009991	4	3.92E-04	4.134851138	9	1142	246	129068	Bm106773,Bm049518,Bm031990,Bm272557,Bm167697,Bm231769,Bm331154,Bm099475,Bm182214,	0.007045936
Molecular function	small molecule binding	GO:0036094	3	4.04E-04	1.450546746	73	28784	253	144704	Bm148081,Bm332195,Bm051745,Bm288262,Bm036587,Bm013355,Bm233779,Bm064764,Bm297062,Bm329062,Bm044946,Bm056146,Bm167440,Bm080119,Bm180624,Bm180625,Bm222262,Bm084624,Bm297719,Bm074945,Bm189551,Bm198381,Bm117136,Bm108304,Bm123407,Bm083431,Bm030869,Bm080392,Bm021919,Bm320544,Bm130126,Bm071584,Bm278031,Bm093491,Bm259422,Bm241968,Bm214243,Bm032427,Bm286893,Bm306436,Bm315242,Bm266704,Bm278097,Bm272557,Bm0…	0.006598216
Molecular function	tetrapyrrole binding	GO:0046906	4	4.11E-04	3.057312253	13	2432	253	144704	Bm115471,Bm101819,Bm307232,Bm217805,Bm020828,Bm162297,Bm111752,Bm111751,Bm112897,Bm329993,Bm265897,Bm315318,Bm127500,	0.00645511
Molecular function	glycosyltransferase activity	GO:0016757	4	6.15E-04	2.569130013	16	3562	253	144704	Bm057191,Bm172075,Bm336006,Bm336003,Bm126278,Bm248753,Bm030529,Bm074945,Bm217805,Bm176040,Bm285027,Bm285029,Bm265769,Bm289875,Bm149586,Bm011402,	0.008655868
Molecular function	calcium ion binding	GO:0005509	6	6.37E-04	2.915836627	13	2550	253	144704	Bm126278,Bm329171,Bm007516,Bm180624,Bm293536,Bm029962,Bm048901,Bm081857,Bm093773,Bm102468,Bm075488,Bm020383,Bm106609,	0.008663318
Molecular function	2 iron, 2 sulfur cluster binding	GO:0051537	5	6.89E-04	7.276750244	5	393	253	144704	Bm034297,Bm258994,Bm064764,Bm285027,Bm285029,	0.009074355
Molecular function	serine-type exopeptidase activity	GO:0070008	6	7.18E-04	5.719525692	6	600	253	144704	Bm049777,Bm040328,Bm032427,Bm076210,Bm076211,Bm193003,	0.00914898
Biological process	response to oxidative stress	GO:0006979	4	8.56E-04	4.106979778	8	1022	246	129068	Bm115471,Bm126278,Bm162297,Bm111752,Bm111751,Bm081723,Bm112897,Bm127500,	0.013449068
Molecular function	organic cyclic compound binding	GO:0097159	3	0.001058233	1.258153978	119	54097	253	144704	Bm148081,Bm332195,Bm051745,Bm288262,Bm036587,Bm200409,Bm106773,Bm129106,Bm013355,Bm144724,Bm115471,Bm150164,Bm233779,Bm127571,Bm013213,Bm064764,Bm297062,Bm329062,Bm044946,Bm031990,Bm071642,Bm056146,Bm167440,Bm101819,Bm080119,Bm180624,Bm180625,Bm222262,Bm307232,Bm297719,Bm189551,Bm198381,Bm269308,Bm050591,Bm117136,Bm108304,Bm130297,Bm123407,Bm083431,Bm030869,Bm217805,Bm080392,Bm021919,Bm016562,Bm0…	0.013083613
Biological process	beta-glucan biosynthetic process	GO:0051274	8	0.001067629	6.591289782	5	398	246	129068	Bm126278,Bm248753,Bm285027,Bm285029,Bm265769,	0.016099852
Molecular function	heterocyclic compound binding	GO:1901363	4	0.00132332	1.406424275	70	28467	253	144704	Bm148081,Bm332195,Bm051745,Bm288262,Bm036587,Bm013355,Bm233779,Bm064764,Bm297062,Bm329062,Bm044946,Bm056146,Bm167440,Bm080119,Bm180624,Bm180625,Bm222262,Bm297719,Bm189551,Bm198381,Bm117136,Bm108304,Bm123407,Bm083431,Bm030869,Bm080392,Bm021919,Bm320544,Bm130126,Bm071584,Bm278031,Bm093491,Bm259422,Bm241968,Bm214243,Bm032427,Bm286893,Bm306436,Bm315242,Bm266704,Bm278097,Bm272557,Bm081531,Bm124876,Bm3…	0.015879838
Molecular function	UDP-glucosyltransferase activity	GO:0035251	7	0.001410197	6.18996287	5	462	253	144704	Bm126278,Bm248753,Bm285027,Bm285029,Bm265769,	0.016438862
Molecular function	oxidoreductase activity, acting on the aldehyde or oxo group of donors	GO:0016903	4	0.001550277	4.916497729	6	698	253	144704	Bm064764,Bm080119,Bm117136,Bm130126,Bm295267,Bm191274,	0.017569801
Biological process	beta-glucan metabolic process	GO:0051273	7	0.001592689	6.016819572	5	436	246	129068	Bm126278,Bm248753,Bm285027,Bm285029,Bm265769,	0.023093986
Biological process	response to inorganic substance	GO:0010035	4	0.001632815	4.173484848	7	880	246	129068	Bm056146,Bm133550,Bm030869,Bm021919,Bm231769,Bm217398,Bm099475,	0.023229098
Molecular function	iron ion binding	GO:0005506	7	0.001904363	2.859762846	11	2200	253	144704	Bm001696,Bm064764,Bm235747,Bm101819,Bm307232,Bm020828,Bm155121,Bm329993,Bm280081,Bm265897,Bm315318,	0.016187086
Molecular function	catalytic activity	GO:0003824	2	0.002209049	1.171254299	157	76667	253	144704	Bm258849,Bm057191,Bm332195,Bm051745,Bm034297,Bm288262,Bm172075,Bm036587,Bm049777,Bm144724,Bm005745,Bm257606,Bm115471,Bm233779,Bm130867,Bm049518,Bm127571,Bm196115,Bm258994,Bm013213,Bm162352,Bm222793,Bm115177,Bm064764,Bm104035,Bm336006,Bm336003,Bm064531,Bm297062,Bm126278,Bm078706,Bm329062,Bm277472,Bm162339,Bm026502,Bm320126,Bm044946,Bm106397,Bm329171,Bm031990,Bm248753,Bm296846,Bm056146,Bm192628,Bm3…	0.018025842
Biological process	hormone metabolic process	GO:0042445	5	0.002620454	4.421348315	6	712	246	129068	Bm233779,Bm013213,Bm064764,Bm080119,Bm189551,Bm191274,	0.034065904
Biological process	cell redox homeostasis	GO:0045454	4	0.002999913	3.739986422	7	982	246	129068	Bm034297,Bm013210,Bm115177,Bm160955,Bm278867,Bm270905,Bm149457,	0.037698911
Biological process	polysaccharide biosynthetic process	GO:0000271	6	0.003102245	4.271370421	6	737	246	129068	Bm336003,Bm126278,Bm248753,Bm285027,Bm285029,Bm265769,	0.038345786
Biological process	cellular catabolic process	GO:0044248	4	0.003110227	2.023273121	19	4927	246	129068	Bm106773,Bm045141,Bm064764,Bm329062,Bm031990,Bm056146,Bm013041,Bm030869,Bm016562,Bm111752,Bm111751,Bm010887,Bm149566,Bm231769,Bm149310,Bm064110,Bm217398,Bm099475,Bm182214,	0.037824376
Biological process	regulation of hormone levels	GO:0010817	4	0.0031228	4.265582656	6	738	246	129068	Bm233779,Bm013213,Bm064764,Bm080119,Bm189551,Bm191274,	0.037374469
Biological process	glucan biosynthetic process	GO:0009250	7	0.003338612	5.064350064	5	518	246	129068	Bm126278,Bm248753,Bm285027,Bm285029,Bm265769,	0.039333021
Molecular function	NADP binding	GO:0050661	8	0.003881589	4.888483497	5	585	253	144704	Bm117136,Bm130126,Bm259422,Bm295267,Bm006080,	0.027784003
Biological process	glyoxylate metabolic process	GO:0046487	8	0.00407165	4.831184776	5	543	246	129068	Bm104035,Bm106397,Bm192628,Bm080119,Bm057256,	0.046515519
Cellular component	cytosol	GO:0005829	3	0.004140667	3.508307009	7	1105	159	88056	Bm104035,Bm106397,Bm056146,Bm057256,Bm030869,Bm021919,Bm217398,	0.015182445
Molecular function	oxidoreductase activity, acting on NAD(P)H	GO:0016651	4	0.004151992	4.023113031	6	853	253	144704	Bm126278,Bm162339,Bm026502,Bm217805,Bm195435,Bm006080,	0.029207114
Molecular function	3-beta-hydroxy-delta5-steroid dehydrogenase activity	GO:0003854	7	0.004167488	4.806324111	5	595	253	144704	Bm233779,Bm013213,Bm080119,Bm189551,Bm191274,	0.028819241
Molecular function	steroid dehydrogenase activity, acting on the CH-OH group of donors, NAD or NADP as acceptor	GO:0033764	6	0.004167488	4.806324111	5	595	253	144704	Bm233779,Bm013213,Bm080119,Bm189551,Bm191274,	0.028819241
Biological process	response to external stimulus	GO:0009605	3	0.004177046	2.185504027	15	3601	246	129068	Bm148081,Bm106773,Bm233779,Bm049518,Bm329061,Bm031990,Bm080119,Bm272557,Bm167697,Bm231769,Bm152841,Bm331154,Bm099475,Bm006080,Bm182214,	0.04631607
Molecular function	steroid dehydrogenase activity	GO:0016229	4	0.004226423	4.790222522	5	597	253	144704	Bm233779,Bm013213,Bm080119,Bm189551,Bm191274,	0.028268531
Molecular function	glucosyltransferase activity	GO:0046527	6	0.005014124	4.597689463	5	622	253	144704	Bm126278,Bm248753,Bm285027,Bm285029,Bm265769,	0.031473269
Molecular function	exopeptidase activity	GO:0008238	5	0.005139319	3.847214591	6	892	253	144704	Bm049777,Bm040328,Bm032427,Bm076210,Bm076211,Bm193003,	0.031770338
Biological process	C21-steroid hormone metabolic process	GO:0008207	6	0.005952942	4.408963585	5	595	246	129068	Bm233779,Bm013213,Bm080119,Bm189551,Bm191274,	0.065050991
Biological process	androgen metabolic process	GO:0008209	6	0.005952942	4.408963585	5	595	246	129068	Bm233779,Bm013213,Bm080119,Bm189551,Bm191274,	0.065050991
Biological process	estrogen metabolic process	GO:0008210	6	0.005952942	4.408963585	5	595	246	129068	Bm233779,Bm013213,Bm080119,Bm189551,Bm191274,	0.065050991
Cellular component	catalytic complex	GO:1902494	3	0.006305804	1.516022169	36	13151	159	88056	Bm288262,Bm106773,Bm150164,Bm130867,Bm127578,Bm127571,Bm045141,Bm104035,Bm126278,Bm106397,Bm262706,Bm031990,Bm056146,Bm192628,Bm222262,Bm057256,Bm030869,Bm317004,Bm029962,Bm048901,Bm098042,Bm081857,Bm043200,Bm010887,Bm124876,Bm253980,Bm093773,Bm199942,Bm102468,Bm149310,Bm302460,Bm064110,Bm020383,Bm106609,Bm182214,Bm112286,	0.02264942
Biological process	folic acid-containing compound metabolic process	GO:0006760	6	0.006548998	4.307608101	5	609	246	129068	Bm049777,Bm056146,Bm030869,Bm080392,Bm032427,	0.06858256
Molecular function	binding	GO:0005488	2	0.006628491	1.117010952	182	93191	253	144704	Bm148081,Bm258849,Bm332195,Bm051745,Bm034297,Bm288262,Bm200738,Bm036587,Bm200409,Bm106773,Bm129106,Bm013355,Bm144724,Bm115471,Bm150164,Bm001140,Bm233779,Bm127571,Bm001696,Bm196583,Bm258994,Bm013213,Bm064764,Bm104035,Bm235747,Bm297062,Bm126278,Bm078706,Bm329062,Bm044946,Bm106397,Bm329171,Bm031990,Bm071642,Bm007516,Bm056146,Bm167440,Bm192628,Bm101819,Bm080119,Bm180624,Bm180625,Bm133550,Bm167415,Bm1…	0.039770948
Biological process	response to chemical	GO:0042221	3	0.007397997	2.186812012	13	3119	246	129068	Bm200409,Bm064764,Bm056146,Bm080119,Bm133550,Bm117136,Bm030869,Bm021919,Bm130126,Bm231769,Bm295267,Bm217398,Bm099475,	0.076412185
Biological process	pteridine-containing compound metabolic process	GO:0042558	5	0.008066213	4.092563703	5	641	246	129068	Bm049777,Bm056146,Bm030869,Bm080392,Bm032427,	0.078986037
Cellular component	protein-containing complex	GO:0032991	2	0.008377109	1.285434715	67	28866	159	88056	Bm309161,Bm288262,Bm036587,Bm106773,Bm150164,Bm001140,Bm130867,Bm214946,Bm127578,Bm127571,Bm001696,Bm045141,Bm064764,Bm104035,Bm126278,Bm106397,Bm262706,Bm031990,Bm071642,Bm056146,Bm257582,Bm192628,Bm222262,Bm145534,Bm269308,Bm057256,Bm013041,Bm013282,Bm332942,Bm030869,Bm317004,Bm029962,Bm111752,Bm119113,Bm048901,Bm098042,Bm081857,Bm043200,Bm214243,Bm042463,Bm010887,Bm178139,Bm124876,Bm253980,Bm1…	0.028909239
Biological process	cellular homeostasis	GO:0019725	3	0.009691083	2.741563248	8	1531	246	129068	Bm034297,Bm013210,Bm115177,Bm093491,Bm160955,Bm278867,Bm270905,Bm149457,	0.089110692
Biological process	regulation of biological quality	GO:0065008	3	0.010851028	2.505039788	9	1885	246	129068	Bm106773,Bm233779,Bm013213,Bm064764,Bm031990,Bm080119,Bm189551,Bm182214,Bm191274,	0.094042244
Biological process	homeostatic process	GO:0042592	2	0.011485058	2.481345244	9	1903	246	129068	Bm034297,Bm013210,Bm115177,Bm133550,Bm093491,Bm160955,Bm278867,Bm270905,Bm149457,	0.098406069
Biological process	cellular aldehyde metabolic process	GO:0006081	4	0.011603577	3.73694207	5	702	246	129068	Bm104035,Bm106397,Bm192628,Bm080119,Bm057256,	0.098304462
Molecular function	UDP-glycosyltransferase activity	GO:0008194	5	0.012071471	3.19824363	6	1073	253	144704	Bm336006,Bm126278,Bm248753,Bm285027,Bm285029,Bm265769,	0.06396312
Molecular function	transition metal ion binding	GO:0046914	6	0.012268972	1.463401221	37	14461	253	144704	Bm258849,Bm001696,Bm196583,Bm064764,Bm104035,Bm235747,Bm078706,Bm106397,Bm056146,Bm101819,Bm133550,Bm167415,Bm167416,Bm222262,Bm307232,Bm145534,Bm057256,Bm030869,Bm020828,Bm093491,Bm042463,Bm081531,Bm155121,Bm124876,Bm091446,Bm329993,Bm280081,Bm155016,Bm285027,Bm285029,Bm265897,Bm180087,Bm104521,Bm315318,Bm047885,Bm306730,Bm022456,	0.064176163
Molecular function	anion binding	GO:0043168	4	0.012437447	1.325212126	59	25464	253	144704	Bm148081,Bm332195,Bm051745,Bm288262,Bm036587,Bm064764,Bm297062,Bm329062,Bm044946,Bm056146,Bm167440,Bm180624,Bm180625,Bm222262,Bm084624,Bm297719,Bm074945,Bm198381,Bm108304,Bm123407,Bm083431,Bm030869,Bm080392,Bm021919,Bm320544,Bm071584,Bm093491,Bm259422,Bm241968,Bm214243,Bm032427,Bm286893,Bm306436,Bm266704,Bm278097,Bm272557,Bm081531,Bm124876,Bm242833,Bm167697,Bm262317,Bm305426,Bm263761,Bm180087,Bm1…	0.064233904
Molecular function	iron-sulfur cluster binding	GO:0051536	4	0.012529534	2.847559021	7	1406	253	144704	Bm034297,Bm258994,Bm064764,Bm216695,Bm004053,Bm285027,Bm285029,	0.063900623
Molecular function	metal cluster binding	GO:0051540	3	0.012529534	2.847559021	7	1406	253	144704	Bm034297,Bm258994,Bm064764,Bm216695,Bm004053,Bm285027,Bm285029,	0.063900623
Cellular component	cell wall	GO:0005618	4	0.01625534	3.4185884	5	810	159	88056	Bm148081,Bm104035,Bm106397,Bm057256,Bm331154,	0.055018074
Molecular function	oxidoreductase activity, acting on paired donors, with incorporation or reduction of molecular oxygen	GO:0016705	4	0.01711694	2.318726632	9	2220	253	144704	Bm329062,Bm101819,Bm307232,Bm021919,Bm020828,Bm259422,Bm329993,Bm265897,Bm315318,	0.079360357
Molecular function	ADP binding	GO:0043531	9	0.019507814	2.601473674	7	1539	253	144704	Bm148081,Bm288262,Bm036587,Bm044946,Bm262317,Bm152841,Bm331154,	0.087463606
Biological process	lipid biosynthetic process	GO:0008610	5	0.019548898	1.868566099	14	3931	246	129068	Bm233779,Bm013213,Bm064764,Bm336006,Bm329062,Bm080119,Bm189551,Bm217805,Bm191387,Bm155121,Bm199942,Bm149566,Bm149586,Bm191274,	0.15680712
Cellular component	mitochondrion	GO:0005739	6	0.019815766	1.765135684	16	5020	159	88056	Bm045141,Bm056146,Bm030529,Bm083431,Bm030869,Bm021919,Bm010887,Bm231769,Bm067833,Bm149310,Bm035650,Bm064110,Bm052074,Bm217398,Bm099475,Bm191274,	0.065803297
Molecular function	catalytic activity, acting on a protein	GO:0140096	3	0.020442416	1.340055807	48	20487	253	144704	Bm057191,Bm332195,Bm051745,Bm034297,Bm172075,Bm049777,Bm130867,Bm196115,Bm297062,Bm277472,Bm031990,Bm080119,Bm040328,Bm222262,Bm198381,Bm108304,Bm083431,Bm278031,Bm093491,Bm259422,Bm241968,Bm032427,Bm286893,Bm042463,Bm266704,Bm272557,Bm081531,Bm124876,Bm253980,Bm091446,Bm242833,Bm305426,Bm180087,Bm231769,Bm035650,Bm114428,Bm075488,Bm076210,Bm076211,Bm193003,Bm074281,Bm099475,Bm011402,Bm263129,Bm1…	0.089682856
Biological process	carbohydrate metabolic process	GO:0005975	4	0.02171551	1.574342248	23	7665	246	129068	Bm049518,Bm336003,Bm126278,Bm320126,Bm329171,Bm248753,Bm190568,Bm074945,Bm117136,Bm217805,Bm130126,Bm043200,Bm272557,Bm156450,Bm149566,Bm285027,Bm285029,Bm281912,Bm265769,Bm149586,Bm123024,Bm265560,Bm295267,	0.172352574
Molecular function	transferase activity, transferring one-carbon groups	GO:0016741	4	0.023475563	2.003655497	11	3140	253	144704	Bm144724,Bm064531,Bm162339,Bm056146,Bm069224,Bm074945,Bm030869,Bm080392,Bm285027,Bm285029,Bm217398,	0.098742573
Molecular function	oxidoreductase activity, acting on CH-OH group of donors	GO:0016614	4	0.024893776	2.067796707	10	2766	253	144704	Bm233779,Bm013213,Bm064764,Bm329062,Bm080119,Bm189551,Bm315230,Bm149566,Bm281912,Bm191274,	0.10259253
Biological process	metabolic process	GO:0008152	2	0.026120419	1.085664533	183	88438	246	129068	Bm309161,Bm258849,Bm057191,Bm332195,Bm051745,Bm288262,Bm172075,Bm036587,Bm200409,Bm106773,Bm049777,Bm144724,Bm150164,Bm001140,Bm233779,Bm130867,Bm214946,Bm049518,Bm127578,Bm127571,Bm001696,Bm196115,Bm258994,Bm013213,Bm045141,Bm064764,Bm104035,Bm336006,Bm336003,Bm064531,Bm297062,Bm126278,Bm078706,Bm329062,Bm277472,Bm162339,Bm320126,Bm106397,Bm329171,Bm262706,Bm031990,Bm071642,Bm248753,Bm056146,Bm1…	0.205154124
Biological process	defense response to bacterium	GO:0042742	7	0.026424992	3.01532567	5	870	246	129068	Bm148081,Bm233779,Bm152841,Bm331154,Bm006080,	0.197271721
Biological process	sucrose metabolic process	GO:0005985	7	0.026929442	2.658783784	6	1184	246	129068	Bm126278,Bm248753,Bm074945,Bm285027,Bm285029,Bm265769,	0.199066661
Molecular function	serine-type peptidase activity	GO:0008236	5	0.027034514	2.137696479	9	2408	253	144704	Bm049777,Bm040328,Bm093491,Bm032427,Bm242833,Bm076210,Bm076211,Bm193003,Bm021572,	0.110300818
Molecular function	serine hydrolase activity	GO:0017171	4	0.027034514	2.137696479	9	2408	253	144704	Bm049777,Bm040328,Bm093491,Bm032427,Bm242833,Bm076210,Bm076211,Bm193003,Bm021572,	0.110300818
Biological process	cellular metabolic process	GO:0044237	3	0.027524247	1.117444219	147	69020	246	129068	Bm309161,Bm057191,Bm332195,Bm051745,Bm288262,Bm172075,Bm200409,Bm106773,Bm049777,Bm144724,Bm150164,Bm001140,Bm233779,Bm130867,Bm214946,Bm049518,Bm127578,Bm127571,Bm001696,Bm258994,Bm013213,Bm045141,Bm064764,Bm104035,Bm336006,Bm336003,Bm064531,Bm297062,Bm126278,Bm329062,Bm277472,Bm162339,Bm106397,Bm262706,Bm031990,Bm071642,Bm248753,Bm056146,Bm257582,Bm192628,Bm080119,Bm133550,Bm167415,Bm030529,Bm2…	0.201488176
Biological process	oligosaccharide metabolic process	GO:0009311	5	0.028137594	2.24456328	8	1870	246	129068	Bm126278,Bm248753,Bm074945,Bm149566,Bm285027,Bm285029,Bm281912,Bm265769,	0.203997556
Molecular function	oxidoreductase activity, acting on the CH-OH group of donors, NAD or NADP as acceptor	GO:0016616	5	0.028287109	2.120087777	9	2428	253	144704	Bm233779,Bm013213,Bm329062,Bm080119,Bm189551,Bm315230,Bm149566,Bm281912,Bm191274,	0.110972503
Biological process	starch metabolic process	GO:0005982	7	0.028685152	2.618968386	6	1202	246	129068	Bm126278,Bm248753,Bm074945,Bm285027,Bm285029,Bm265769,	0.205986711
Biological process	response to bacterium	GO:0009617	6	0.029098147	2.937663307	5	893	246	129068	Bm148081,Bm233779,Bm152841,Bm331154,Bm006080,	0.206981157
Biological process	iron ion transport	GO:0006826	9	0.029098147	2.937663307	5	893	246	129068	Bm044946,Bm278097,Bm182371,Bm075488,Bm263129,	0.206981157
Molecular function	protein kinase activity	GO:0004672	6	0.030672395	1.538634938	22	8178	253	144704	Bm332195,Bm051745,Bm130867,Bm297062,Bm198381,Bm108304,Bm083431,Bm278031,Bm241968,Bm286893,Bm042463,Bm266704,Bm272557,Bm081531,Bm305426,Bm180087,Bm035650,Bm114428,Bm075488,Bm263129,Bm112286,Bm135383,	0.116956422
Biological process	potassium ion transport	GO:0006813	8	0.03587714	2.480693459	6	1269	246	129068	Bm057191,Bm172075,Bm130867,Bm329062,Bm133434,Bm011402,	0.241530029
Biological process	monocarboxylic acid metabolic process	GO:0032787	7	0.036610035	1.756545626	13	3883	246	129068	Bm049518,Bm064764,Bm104035,Bm329062,Bm106397,Bm192628,Bm080119,Bm057256,Bm272557,Bm155121,Bm199942,Bm149566,Bm281912,	0.244282891
Biological process	polysaccharide metabolic process	GO:0005976	5	0.038317316	2.249030414	7	1633	246	129068	Bm336003,Bm126278,Bm248753,Bm074945,Bm285027,Bm285029,Bm265769,	0.253432073
Biological process	response to stimulus	GO:0050896	2	0.039651344	1.256385696	55	22968	246	129068	Bm148081,Bm332195,Bm288262,Bm200409,Bm106773,Bm129106,Bm115471,Bm233779,Bm049518,Bm064764,Bm104035,Bm126278,Bm329061,Bm106397,Bm329171,Bm031990,Bm296846,Bm056146,Bm080119,Bm133550,Bm030529,Bm222262,Bm057256,Bm117136,Bm013041,Bm030869,Bm021919,Bm016562,Bm130126,Bm162297,Bm111752,Bm111751,Bm294142,Bm043569,Bm081723,Bm112897,Bm260691,Bm092424,Bm272557,Bm081531,Bm124876,Bm253980,Bm167697,Bm262317,Bm1…	0.251236248
Molecular function	transferase activity	GO:0016740	3	0.039996538	1.237685151	61	28189	253	144704	Bm057191,Bm332195,Bm051745,Bm172075,Bm036587,Bm144724,Bm130867,Bm127571,Bm162352,Bm336006,Bm336003,Bm064531,Bm297062,Bm126278,Bm162339,Bm248753,Bm056146,Bm080119,Bm030529,Bm222262,Bm069224,Bm074945,Bm198381,Bm108304,Bm083431,Bm030869,Bm217805,Bm080392,Bm071584,Bm278031,Bm197256,Bm241968,Bm191387,Bm286893,Bm042463,Bm022837,Bm266704,Bm272557,Bm081531,Bm091446,Bm167697,Bm176040,Bm305426,Bm280081,Bm1…	0.145701675
Biological process	cellular modified amino acid metabolic process	GO:0006575	5	0.040928061	2.401220442	6	1311	246	129068	Bm049777,Bm056146,Bm030869,Bm080392,Bm032427,Bm149566,	0.257164651
Biological process	glucan metabolic process	GO:0044042	6	0.041811377	2.388467375	6	1318	246	129068	Bm126278,Bm248753,Bm074945,Bm285027,Bm285029,Bm265769,	0.260543621
Biological process	organonitrogen compound catabolic process	GO:1901565	5	0.04341449	1.811466834	11	3186	246	129068	Bm045141,Bm329062,Bm056146,Bm030869,Bm010887,Bm149566,Bm231769,Bm149310,Bm064110,Bm217398,Bm099475,	0.259797819
Biological process	disaccharide metabolic process	GO:0005984	6	0.045197185	2.342261905	6	1344	246	129068	Bm126278,Bm248753,Bm074945,Bm285027,Bm285029,Bm265769,	0.262143672
Molecular function	adenyl nucleotide binding	GO:0030554	7	0.046764233	1.269771209	48	21621	253	144704	Bm148081,Bm332195,Bm051745,Bm288262,Bm036587,Bm013355,Bm297062,Bm044946,Bm080119,Bm222262,Bm297719,Bm198381,Bm117136,Bm108304,Bm083431,Bm021919,Bm320544,Bm130126,Bm259422,Bm241968,Bm032427,Bm286893,Bm315242,Bm266704,Bm272557,Bm081531,Bm124876,Bm315230,Bm242833,Bm262317,Bm305426,Bm263761,Bm149566,Bm180087,Bm231769,Bm152841,Bm281912,Bm331154,Bm035650,Bm014956,Bm114428,Bm075488,Bm295267,Bm099475,Bm2…	0.155120382
Biological process	dicarboxylic acid metabolic process	GO:0043648	7	0.047226182	2.316409124	6	1359	246	129068	Bm049777,Bm080119,Bm197256,Bm032427,Bm167697,Bm191274,	0.267733391
