# Supplementary figures and images for: Variability in Leaf Color Induced by Chlorophyll Deficiency: Transcriptional Changes in Bamboo Leaves
Source: Preprints.org preprint supplement (doi:10.20944/preprints202311.0939.v2), 2023-12-27

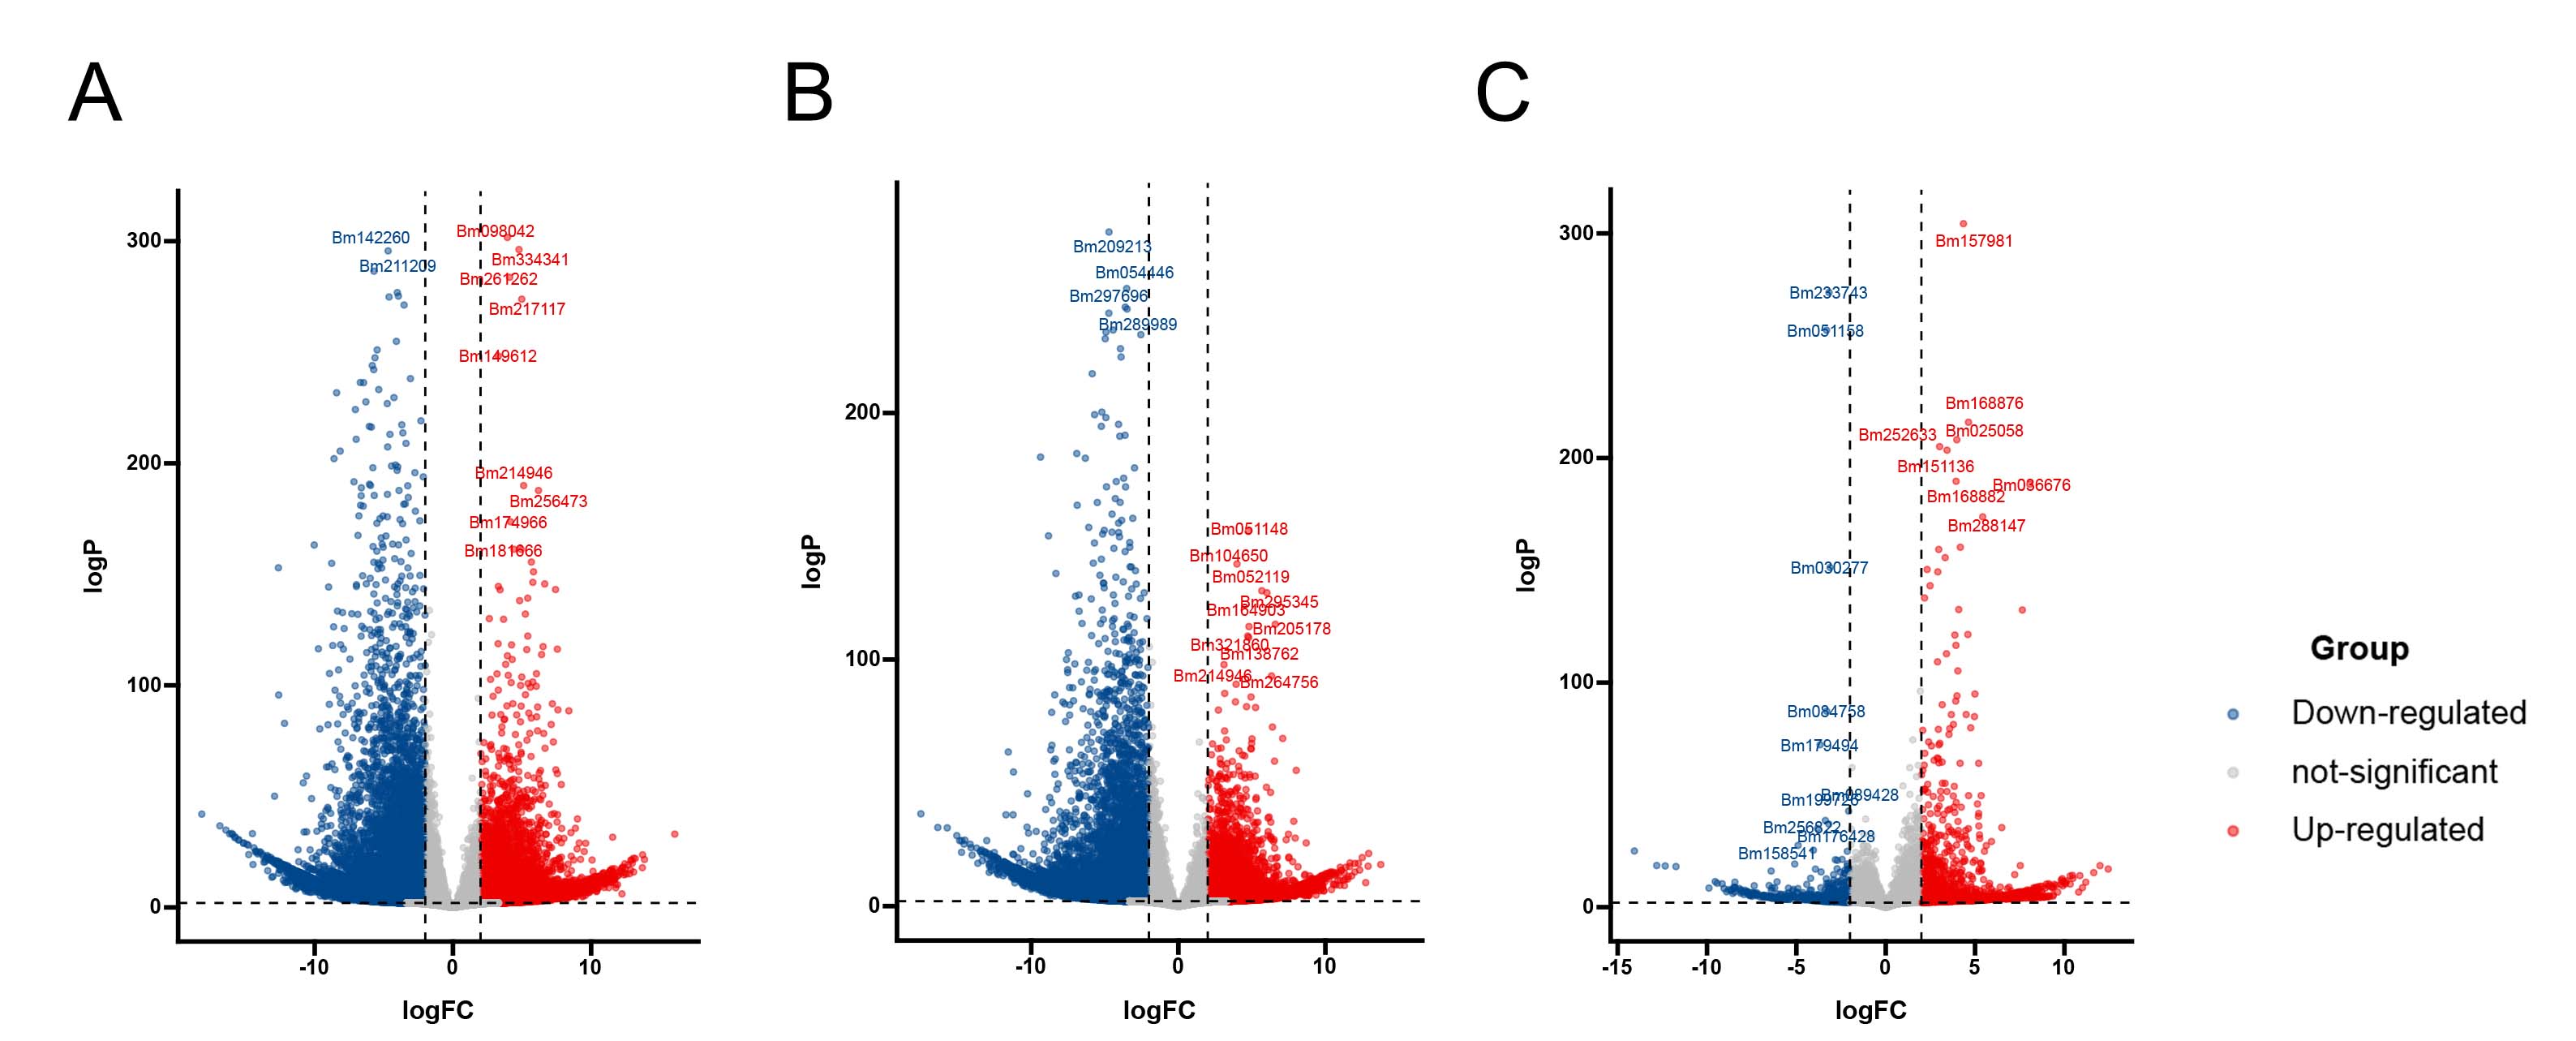

Supplement: Supplementary file 2 [file supplementary › Figure S1.jpg]

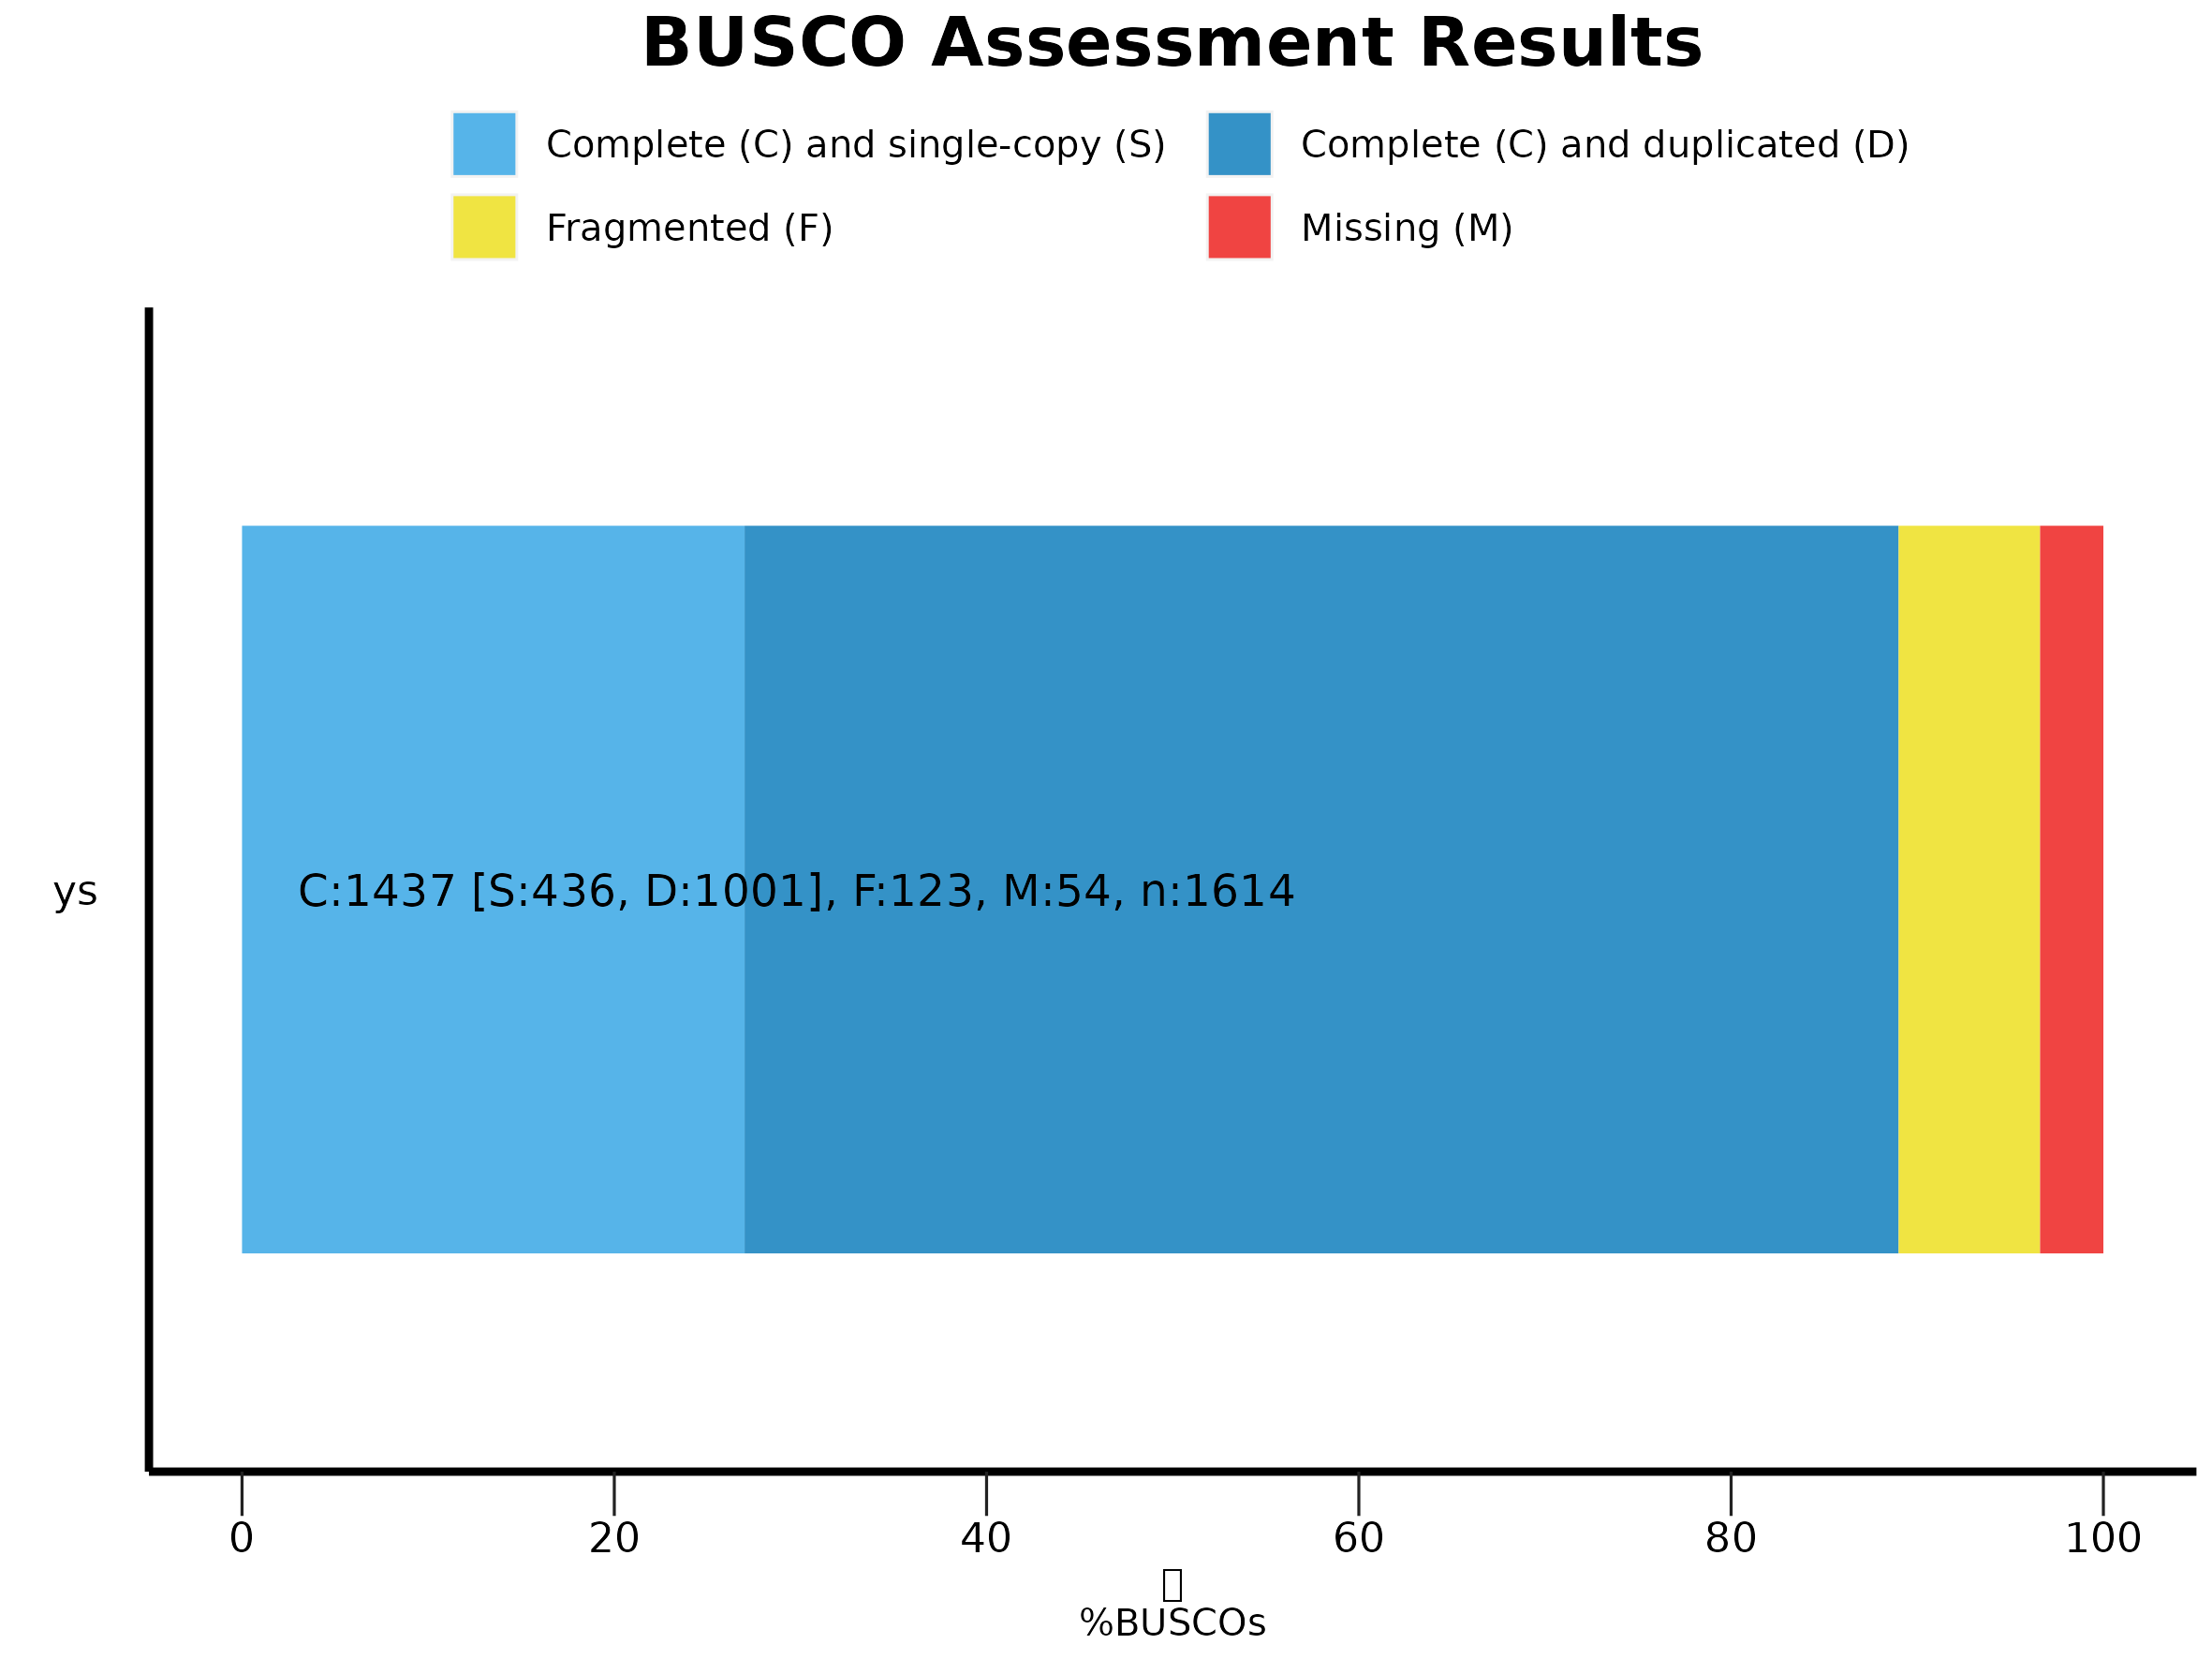

Supplement: Supplementary file 2 [file supplementary › Figure S2.png]
